# Supplementary material for: Basic Emotions in the Nencki Affective Word List (NAWL BE): New Method of Classifying Emotional Stimuli
Source: PLoS One. 2015 Jul 6;10(7):e0132305. doi: 10.1371/journal.pone.0132305 (PMC4492597; doi:10.1371/journal.pone.0132305)
Supplement: S1 Dataset — The database includes happiness, anger, sadness, fear and disgust ratings separately for the whole sample, as well as for females and males separately. The detailed description of the contents of the database can be found in the Description of the database section. (XLSX) [file pone.0132305.s004.xlsx]

## Sheet: NAWL_supplementary
No.	BAWL_word	NAWL_word	BE_N_all	hap_M_all	hap_SD_all	ang_M_all	ang_SD_all	sad_M_all	sad_SD_all	fea_M_all	fea_SD_all	dis_M_all	dis_SD_all	BE_N_women	hap_M_women	hap_SD_women	ang_M_women	ang_SD_women	sad_M_women	sad_SD_women	fea_M_women	fea_SD_women	dis_M_women	dis_SD_women	BE_N_men	hap_M_men	hap_SD_men	ang_M_men	ang_SD_men	sad_M_men	sad_SD_men	fea_M_men	fea_SD_men	dis_M_men	dis_SD_men	DENN_BAWL	Briesemeister_liberal	Briesemeister_conservative	Mikels	Mikels_blended	ED_class
8	abdanken	abdykować	26	1.69231	1.40767	1.57692	0.808608	2.23077	1.50486	1.96154	1.37057	1.38462	0.697247	12	1.58333	0.996205	1.66667	0.887625	2.58333	1.1645	1.75	0.753778	1.16667	0.389249	14	1.78571	1.71772	1.5	0.759555	1.92857	1.73046	2.14286	1.74784	1.57143	0.851631		S	none	undifferentiated		unclassified
42	absurd	absurd	26	2.15385	1.40548	3.42308	1.98339	2.19231	1.67378	2.34615	1.6957	2.42308	1.90101	11	2.72727	1.55505	3.09091	2.2563	1.63636	1.02691	1.72727	1.10371	2.27273	1.95402	15	1.73333	1.16292	3.66667	1.79947	2.6	1.95667	2.8	1.93465	2.53333	1.9223		A	none	undifferentiated		A
57	adjutant	adiutant	27	1.96296	1.37229	1.48148	0.848998	1.51852	1.15593	1.66667	1	1.33333	0.620174	14	2.14286	1.51186	1.71429	0.99449	1.78571	1.47693	1.78571	1.0509	1.35714	0.497245	13	1.76923	1.23517	1.23077	0.599145	1.23077	0.599145	1.53846	0.967418	1.30769	0.751068	1	H	none	undifferentiated		N
2661	verwaltung	administracja	26	1.73077	1.45761	3.38462	2.11805	2.19231	1.83345	2.57692	1.8149	2.65385	1.99885	15	1.26667	0.593617	3.46667	1.72654	2	1.51186	2.2	1.26491	2.33333	1.44749	11	2.36364	2.01359	3.27273	2.64919	2.45455	2.25227	3.09091	2.34327	3.09091	2.58668		A	none	undifferentiated		unclassified
59	adoption	adoptować	27	3.59259	2.15298	1.92593	1.38469	2.25926	1.7887	2.81481	1.84051	1.40741	1.11835	14	4.71429	1.54066	2.35714	1.49908	2.42857	1.65084	3.78571	1.88837	1.78571	1.47693	13	2.38462	2.10311	1.46154	1.1266	2.07692	1.97744	1.76923	1.09193	1	0	1	H	none	undifferentiated		unclassified
60	adressat	adresat	26	2.73077	1.6866	1.57692	1.02657	1.5	1.02956	1.73077	1.11562	1.38462	0.982931	15	2.8	1.85934	1.8	1.20712	1.66667	1.23443	1.8	1.20712	1.66667	1.23443	11	2.63636	1.50151	1.27273	0.64667	1.27273	0.64667	1.63636	1.02691	1	0	1	H	none	H		N
61	adria	Adriatyk	27	3.77778	2.06311	1.25926	0.712125	1.37037	0.883531	1.85185	1.2921	1.11111	0.320256	14	4.64286	1.86495	1.28571	0.61125	1.57143	1.08941	2.28571	1.32599	1.21429	0.425815	13	2.84615	1.90815	1.23077	0.83205	1.15385	0.5547	1.38462	1.1209	1	0	1	H	none	H		unclassified
62	advent	adwentowy	27	3.37037	2.23861	1.81481	1.35978	1.96296	1.19233	1.48148	0.975483	1.66667	1.4676	14	3.28571	1.9779	1.5	1.01905	1.92857	1.20667	1.35714	0.928783	1.42857	1.60357	13	3.46154	2.56955	2.15385	1.62512	2	1.22474	1.61538	1.04391	1.92308	1.32045	1	H	none	H		unclassified
149	anwalt	adwokat	26	2.30769	1.69161	2.23077	1.70429	2.23077	1.68066	3.38462	1.85638	2.07692	1.57285	11	2.63636	2.15744	2.45455	2.0181	2.81818	2.08893	3.36364	1.9633	1.81818	1.66242	15	2.06667	1.27988	2.06667	1.48645	1.8	1.20712	3.4	1.84391	2.26667	1.53375	1	F	none	undifferentiated		F
64	affekt	afekt	26	1.53846	0.904689	2.03846	1.48272	1.61538	0.897861	1.76923	1.24283	1.5	0.860233	12	2	1.12815	2.25	1.48477	1.75	0.866025	2.08333	1.50504	1.58333	0.792961	14	1.14286	0.363137	1.85714	1.51186	1.5	0.94054	1.5	0.94054	1.42857	0.937614	1	A	none	undifferentiated		N
65	agent	agent	26	1.61538	1.02282	2.57692	1.85845	1.5	0.989949	2.80769	1.85514	2.34615	1.83177	12	1.66667	1.07309	2.66667	1.72328	1.75	1.3568	2.83333	1.85047	2.75	1.95982	14	1.57143	1.01635	2.5	2.02864	1.28571	0.468807	2.78571	1.92867	2	1.7097	1	F	none	undifferentiated		F
66	aggression	agresywny	26	1.38462	0.803837	4.5	1.92354	3.73077	2.10823	4.96154	1.86506	3.76923	1.70429	14	1.14286	0.534522	4.35714	2.23975	3.92857	2.269	5.14286	1.91581	3.5	1.82925	12	1.66667	0.984732	4.66667	1.557	3.5	1.97714	4.75	1.86474	4.08333	1.56428		F	none	undifferentiated		unclassified
71	akademie	akademia	27	4.25926	1.93336	1.25926	0.525693	1.22222	0.50637	2.03704	1.19233	1.25926	0.655896	14	4.35714	1.69193	1.28571	0.61125	1.21429	0.578934	2.07143	1.26881	1	0	13	4.15385	2.23033	1.23077	0.438529	1.23077	0.438529	2	1.1547	1.53846	0.877058	1	H	H	H		unclassified
2804	wohnheim	akademik	26	3.57692	2.00346	1.42308	0.856648	1.69231	1.22537	1.73077	1.31325	2	1.67332	12	3.75	2.17945	1.5	0.797724	1.66667	1.23091	1.75	1.21543	1.58333	0.996205	14	3.42857	1.91007	1.35714	0.928783	1.71429	1.26665	1.71429	1.43734	2.35714	2.06089	1	H	none	H		unclassified
77	akzent	akcent	27	3	1.86052	1.48148	0.893152	1.11111	0.423659	1.51852	1.01414	1.22222	0.57735	14	3	1.88108	1.42857	0.851631	1.21429	0.578934	1.35714	0.841897	1.07143	0.267261	13	3	1.91485	1.53846	0.967418	1	0	1.69231	1.18213	1.38462	0.767948	1	H	none	H		N
2891	zustimmung	akceptować	26	4.76923	1.7506	1.76923	1.2746	1.65385	1.01754	2.11538	2.00653	1.92308	1.76461	12	4.41667	1.88092	2.41667	1.56428	1.66667	0.984732	2.08333	1.92865	2.41667	2.06522	14	5.07143	1.63915	1.21429	0.578934	1.64286	1.08182	2.14286	2.14322	1.5	1.40055		H	H	H		unclassified
73	aktie	akcja	26	3.84615	1.86959	1.69231	0.970329	1.5	1.02956	2.61538	1.55118	1.34615	0.845804	13	3.38462	2.06311	1.84615	0.987096	1.53846	0.967418	2.84615	1.90815	1.38462	0.960769	13	4.30769	1.60128	1.53846	0.967418	1.46154	1.1266	2.38462	1.1209	1.30769	0.751068	1	H	none	H		unclassified
1449	manege	akrobatyczny	27	3.40741	2.18842	1.40741	0.888355	1.55556	1.1209	2.2963	1.51441	1.55556	0.974022	14	3.42857	2.37663	1.57143	1.15787	1.57143	1.28388	2.35714	1.39268	1.64286	1.15073	13	3.38462	2.06311	1.23077	0.438529	1.53846	0.967418	2.23077	1.69085	1.46154	0.77625	1	H	none	undifferentiated		unclassified
76	aktivität	aktywność	26	4.92308	1.52113	1.42308	0.986836	1.30769	0.617688	1.69231	1.28901	1.11538	0.431455	12	4.91667	1.31137	1.25	0.866025	1.16667	0.57735	1.5	1	1.16667	0.57735	14	4.92857	1.73046	1.57143	1.08941	1.42857	0.646206	1.85714	1.51186	1.07143	0.267261		H	H	H		unclassified
75	aktiv	aktywny	26	4.84615	1.4613	1.92308	1.57285	1.65385	1.26309	1.88462	1.50537	1.57692	1.20576	13	4.92308	1.44115	1.92308	1.5525	1.53846	0.967418	2.15385	1.72463	1.69231	1.31559	13	4.76923	1.5359	1.92308	1.65638	1.76923	1.5359	1.61538	1.26085	1.46154	1.1266		H	H	H		unclassified
156	aquarium	akwarium	26	3.76923	2.12241	1.15385	0.367946	1.38462	0.752432	1.26923	0.603834	1.76923	1.24283	11	3.72727	1.95402	1.09091	0.301511	1.36364	0.6742	1.09091	0.301511	2	1.48324	15	3.8	2.30527	1.2	0.414039	1.4	0.828079	1.4	0.736788	1.6	1.0556	1	H	none	H		unclassified
78	alarm	alarm	26	1.42308	0.986836	3.03846	2.34061	2.26923	1.86671	4.38462	2.15549	1.88462	1.72805	12	1.33333	0.887625	3.58333	2.60971	1.91667	1.50504	5	1.90693	1.91667	1.67649	14	1.5	1.09193	2.57143	2.06488	2.57143	2.13809	3.85714	2.28228	1.85714	1.83375	1	F	none	undifferentiated		F
80	album	album	26	3.73077	1.90909	1.26923	0.874423	1.57692	0.808608	1.11538	0.431455	1.11538	0.588348	12	4.08333	1.88092	1.25	0.621582	1.66667	0.887625	1.08333	0.288675	1	0	14	3.42857	1.94992	1.28571	1.06904	1.5	0.759555	1.14286	0.534522	1.21429	0.801784	1	H	H	H		unclassified
82	allee	aleja	27	4.25926	2.24624	1.37037	0.966681	1.62963	1.41824	1.85185	1.43322	1.22222	0.697982	14	5.35714	2.09788	1.28571	0.726273	1.42857	0.755929	1.71429	1.06904	1.14286	0.534522	13	3.07692	1.801	1.46154	1.19829	1.84615	1.90815	2	1.77951	1.30769	0.85485	1	H	H	H		unclassified
81	alkohol	alkohol	27	3.40741	1.92672	2.88889	1.88788	3.03704	2.00924	3.03704	1.8909	2.88889	1.82574	14	3.28571	1.9779	3	2.0755	3	2.35339	3.21429	2.22498	3.14286	2.0702	13	3.53846	1.94145	2.76923	1.73944	3.07692	1.65638	2.84615	1.51911	2.61538	1.55662	1	H	none	undifferentiated		unclassified
2445	torkeln	alkoholik	26	1.30769	1.19228	5.38462	1.87781	5.34615	1.91713	4.84615	2.11078	5.23077	1.88271	12	1	0	6.25	1.21543	5.75	1.71226	5.58333	1.78164	6.33333	1.37069	14	1.57143	1.60357	4.64286	2.06089	5	2.0755	4.21429	2.22498	4.28571	1.77281		A	none	undifferentiated		unclassified
1279	laube	altanka	26	4.92308	1.57285	1.11538	0.431455	1.69231	1.54322	1.15385	0.784465	1.11538	0.431455	13	5	1.91485	1	0	2.07692	1.97744	1.30769	1.1094	1	0	13	4.84615	1.21423	1.23077	0.599145	1.30769	0.85485	1	0	1.23077	0.599145	1	H	H	H		unclassified
944	guttun	altruistyczny	26	3.42308	2.40288	1.65385	1.38397	1.76923	1.33589	1.69231	1.43581	1.42308	1.02657	15	3.93333	2.54858	1.4	0.910259	1.86667	1.55226	1.66667	1.39728	1.13333	0.351866	11	2.72727	2.10195	2	1.84391	1.63636	1.02691	1.72727	1.55505	1.81818	1.47093		H	none	H		unclassified
92	amateur	amatorski	26	2.11538	1.47856	1.84615	1.34736	1.5	1.02956	1.76923	1.47804	1.61538	0.852147	12	2.08333	1.24011	1.5	0.6742	1.41667	0.900337	1.5	1.16775	1.33333	0.492366	14	2.14286	1.70326	2.14286	1.70326	1.57143	1.15787	2	1.7097	1.85714	1.02711	1	H	none	undifferentiated		N
421	botschaft	ambasada	27	2.59259	1.9857	1.37037	0.791695	1.22222	0.697982	1.74074	0.984206	1.33333	0.784465	14	2.21429	1.96815	1.28571	0.726273	1.14286	0.534522	1.5	0.85485	1.14286	0.534522	13	3	2	1.46154	0.877058	1.30769	0.85485	2	1.08012	1.53846	0.967418		H	none	undifferentiated		N
543	ehrgeiz	ambicja	26	4.11538	2.14153	2	1.49666	1.53846	1.47596	2.46154	1.90223	1.53846	1.17408	12	4.83333	1.40346	1.91667	1.56428	1.33333	1.1547	2.08333	1.56428	1	0	14	3.5	2.50384	2.07143	1.49174	1.71429	1.72888	2.78571	2.15473	2	1.4676	1	H	none	H		unclassified
2336	strebsam	ambitny	26	5.07692	1.52113	1.57692	1.36156	1.65385	1.19808	1.80769	1.13205	1.07692	0.271746	12	4.75	1.65831	1.5	0.797724	1.58333	1.24011	1.91667	1.24011	1.08333	0.288675	14	5.35714	1.39268	1.64286	1.7368	1.71429	1.20439	1.71429	1.06904	1.07143	0.267261		H	H	H		unclassified
1109	kanzel	ambona	27	2.07407	1.54237	2.44444	2.08167	1.92593	1.49167	2.14815	1.74761	2.2963	2.0346	14	2.42857	1.6968	2.42857	1.91007	2.07143	1.68543	2.64286	1.98483	2.07143	1.77436	13	1.69231	1.31559	2.46154	2.3315	1.76923	1.30089	1.61538	1.3253	2.53846	2.3315	1	A	none	undifferentiated		unclassified
94	amerika	Ameryka	26	4.26923	1.99113	1.65385	0.745241	1.69231	1.19228	2.26923	1.56353	1.80769	1.54969	15	3.73333	1.83095	1.86667	0.743223	2.06667	1.43759	2.8	1.82052	1.4	1.0556	11	5	2.04939	1.36364	0.6742	1.18182	0.40452	1.54545	0.687552	2.36364	1.9633	1	H	H	H		unclassified
95	ami	Amerykanin	27	3.51852	2.17274	1.88889	1.36814	1.62963	1.14852	1.48148	1.01414	1.62963	1.07946	14	3.5	2.65301	1.5	1.09193	1.21429	0.578934	1.07143	0.267261	1.21429	0.578934	13	3.53846	1.61325	2.30769	1.54837	2.07692	1.44115	1.92308	1.32045	2.07692	1.32045		H	none	H		unclassified
97	ampulle	ampułka	26	2.34615	1.93788	1.88462	1.39505	2.19231	1.35703	3.23077	2.08437	2.38462	2.04112	11	2.09091	1.446	2.09091	1.70027	2.36364	1.36182	3.90909	2.16585	2.63636	2.4606	15	2.53333	2.26358	1.73333	1.16292	2.06667	1.38701	2.73333	1.94447	2.2	1.74028	1	F	none	undifferentiated		unclassified
100	amulett	amulet	26	3.26923	2.14584	2.30769	2.1683	2.07692	1.54721	2.57692	1.85845	2.23077	2.23263	12	3	2.17423	2.91667	2.50303	2.08333	1.83196	2.83333	1.89896	2.83333	2.65718	14	3.5	2.17503	1.78571	1.76193	2.07143	1.32806	2.35714	1.86495	1.71429	1.72888	1	H	none	undifferentiated		unclassified
1599	munition	amunicja	26	1.5	1.27279	2.34615	1.89615	1.88462	1.79615	3.76923	2.17821	2.11538	1.58308	12	1.16667	0.57735	2.33333	1.66969	1.33333	0.778499	4.08333	1.31137	2.16667	1.33712	14	1.78571	1.62569	2.35714	2.13423	2.35714	2.27384	3.5	2.73861	2.07143	1.8172	1	F	none	F		F
105	anekdote	anegdota	27	4.03704	1.99	1.33333	0.679366	1.22222	0.697982	1.33333	0.733799	1.22222	0.697982	14	4.14286	1.9945	1.21429	0.425815	1.07143	0.267261	1.14286	0.363137	1	0	13	3.92308	2.06	1.46154	0.877058	1.38462	0.960769	1.53846	0.967418	1.46154	0.967418	1	H	H	H		unclassified
592	engel	anioł	27	5.37037	1.84283	1.25926	0.525693	1.2963	0.608581	1.66667	1.1767	1.14815	0.362014	14	6.21429	1.25137	1.21429	0.578934	1.07143	0.267261	1.28571	0.61125	1.07143	0.267261	13	4.46154	1.98391	1.30769	0.480384	1.53846	0.77625	2.07692	1.49786	1.23077	0.438529	1	H	H	H		H
134	anomalie	anomalia	26	1.5	1.02956	2.61538	1.60192	2.73077	1.97094	3.61538	2.00154	2.30769	1.71509	15	1.33333	0.723747	2.4	1.72378	2.66667	1.91485	3.86667	2.03072	2.26667	1.70992	11	1.72727	1.3484	2.90909	1.446	2.81818	2.13627	3.27273	2.00454	2.36364	1.80404	1	F	none	undifferentiated		F
135	anonym	anonim	26	1.84615	1.51505	2.19231	1.69751	1.65385	1.12933	3.11538	2.16013	1.88462	1.55761	12	2.25	2.0505	1.66667	1.07309	1.5	1	2.41667	1.72986	1.25	0.621582	14	1.5	0.759555	2.64286	2.02322	1.78571	1.25137	3.71429	2.36736	2.42857	1.91007		F	none	undifferentiated		F
136	anormal	anormalny	26	2.11538	1.42343	2.15385	1.4613	2.73077	1.6866	3.57692	1.79272	2.76923	1.7276	14	1.78571	1.12171	1.71429	1.13873	2.64286	1.7368	3.71429	2.05421	2.71429	1.85757	12	2.5	1.67874	2.66667	1.66969	2.83333	1.6967	3.41667	1.50504	2.83333	1.64225		F	none	undifferentiated		unclassified
152	apathie	apatia	27	1.44444	1.05003	2.62963	1.9245	3.66667	1.96116	2.59259	1.78151	2.37037	1.77911	14	1.57143	1.2225	2.71429	1.9779	4.07143	2.30265	2.85714	2.10703	2.5	1.9115	13	1.30769	0.85485	2.53846	1.94145	3.23077	1.48064	2.30769	1.37747	2.23077	1.69085	1	S	none	undifferentiated		S
1409	lustlos	apatyczny	26	1.23077	0.992278	3	2.15407	3.96154	1.77721	2	1.6	2.84615	2.12964	13	1	0	3.23077	2.24179	4.23077	2.04751	2.38462	1.93815	2.84615	2.33973	13	1.46154	1.39137	2.76923	2.12736	3.69231	1.49358	1.61538	1.1209	2.84615	1.99358		S	none	undifferentiated		S
154	appetit	apetyt	26	4	1.5748	1.76923	1.2746	1.61538	1.16883	1.26923	0.533494	1.23077	0.58704	12	4.16667	1.52753	1.5	1	1.25	0.621582	1.25	0.452267	1.25	0.621582	14	3.85714	1.65748	2	1.4676	1.92857	1.43925	1.28571	0.61125	1.21429	0.578934	1	H	H	H		unclassified
155	applaus	aplauz	26	5.11538	1.77374	1.61538	1.20256	1.5	0.948683	1.80769	1.29674	1.61538	1.13409	15	5.13333	1.72654	1.66667	1.17514	1.6	0.985611	2.2	1.56753	1.26667	0.703732	11	5.09091	1.92117	1.54545	1.29334	1.36364	0.924416	1.27273	0.467099	2.09091	1.446	1	H	H	H		unclassified
388	billigen	aprobować	26	3.76923	2.08437	1.76923	1.45073	1.38462	0.897861	1.92308	1.59808	1.38462	0.803837	12	4.58333	2.02073	1.75	1.71226	1.25	0.621582	2.08333	1.92865	1.25	0.621582	14	3.07143	1.94004	1.78571	1.25137	1.5	1.09193	1.78571	1.3114	1.5	0.94054		H	none	H		unclassified
1665	neigen	aprobujący	26	3.88462	2.02636	1.38462	0.803837	1.23077	0.58704	1.46154	0.646886	1.30769	1.12318	11	4.90909	1.6404	1.27273	0.467099	1.09091	0.301511	1.54545	0.687552	1	0	15	3.13333	1.99523	1.46667	0.99043	1.33333	0.723747	1.4	0.632456	1.53333	1.45733		H	H	H		unclassified
160	archiv	archiwum	26	2.26923	1.66271	1.38462	1.13409	1.57692	1.02657	2.07692	1.41204	1.38462	0.897861	14	1.71429	1.63747	1.28571	0.82542	1.57143	1.08941	1.71429	1.26665	1.21429	0.578934	12	2.91667	1.50504	1.5	1.446	1.58333	0.996205	2.5	1.50756	1.58333	1.1645	1	H	none	undifferentiated		N
168	arrest	areszt	26	1.30769	0.788377	3.76923	1.96586	4.07692	1.93748	4.73077	1.90909	2.96154	2.06844	15	1.13333	0.516398	4	1.92725	4.4	1.50238	4.6	2.06328	2.86667	1.76743	11	1.54545	1.03573	3.45455	2.06706	3.63636	2.41962	4.90909	1.7581	3.09091	2.50817	1	F	none	undifferentiated		unclassified
2615	verhaften	aresztować	26	1.26923	1.00231	4.19231	1.78928	3.88462	2.02636	4.69231	1.93431	2.57692	1.72448	12	1.16667	0.389249	4.16667	1.80067	4	2.08893	5	1.59545	2.66667	1.49747	14	1.35714	1.33631	4.21429	1.84718	3.78571	2.04483	4.42857	2.20887	2.5	1.95133		F	none	blended	FAS	unclassified
1107	kanone	armata	27	2.44444	1.64862	2.22222	1.62512	2.07407	1.54237	3.22222	2.1183	2.22222	1.94804	14	2	1.35873	1.92857	1.43925	1.85714	1.35062	3.28571	2.09132	2.35714	2.16997	13	2.92308	1.84669	2.53846	1.8081	2.30769	1.75046	3.15385	2.23033	2.07692	1.75412	1	F	none	undifferentiated		unclassified
165	armee	armia	26	2.34615	1.74224	2.73077	1.73338	2.96154	1.82166	4.07692	1.64738	2.15385	1.59229	14	1.85714	1.74784	2.57143	1.82775	3	2	4.21429	1.57766	1.85714	1.23146	12	2.91667	1.62135	2.91667	1.67649	2.91667	1.67649	3.91667	1.78164	2.5	1.93061	1	F	none	undifferentiated		F
169	arroganz	arogancki	26	1.15385	0.464095	4.69231	1.69161	2.76923	1.65669	2.76923	1.55712	3.88462	1.9458	13	1.23077	0.599145	5	1.91485	2.84615	1.90815	3.38462	1.80455	4.07692	2.10006	13	1.07692	0.27735	4.38462	1.44559	2.69231	1.4367	2.15385	0.987096	3.69231	1.84321	1	A	none	undifferentiated		A
167	aroma	aromat	27	4.62963	1.59683	1.11111	0.423659	1.14815	0.533761	1.33333	1.20894	1.51852	0.848998	14	5	1.4676	1.14286	0.534522	1.14286	0.534522	1.42857	1.60357	1.35714	0.744946	13	4.23077	1.69085	1.07692	0.27735	1.15385	0.5547	1.23077	0.599145	1.69231	0.947331	1	H	H	H		unclassified
1358	lilie	aromatyczny	26	4.53846	1.63048	1.53846	1.36325	1.42308	1.10175	1.38462	1.26734	1.34615	0.79711	12	4.83333	1.74946	1.66667	1.77525	1.58333	1.50504	1.66667	1.77525	1.58333	0.996205	14	4.28571	1.54066	1.42857	0.937614	1.28571	0.61125	1.14286	0.534522	1.14286	0.534522	1	H	H	H		unclassified
171	arsen	arsen	26	1.88462	1.60815	1.76923	1.36551	1.84615	1.4613	2.73077	1.75631	1.96154	1.45549	13	1.92308	1.89128	1.76923	1.48064	1.92308	1.65638	2.61538	1.93815	1.76923	1.48064	13	1.84615	1.3445	1.76923	1.30089	1.76923	1.30089	2.84615	1.62512	2.15385	1.46322	1	F	none	undifferentiated		unclassified
172	arsenal	arsenał	27	2.22222	1.52753	1.55556	0.800641	1.77778	1.2195	2.62963	1.71303	1.81481	1.33119	14	2.35714	1.27745	1.85714	0.864438	2.28571	1.43734	3.14286	1.56191	2.14286	1.46009	13	2.07692	1.801	1.23077	0.599145	1.23077	0.599145	2.07692	1.75412	1.46154	1.1266	1	F	none	undifferentiated		F
1254	künstler	artystyczny	27	4.14815	1.87501	1.92593	1.20658	1.66667	1.03775	1.62963	1.27545	1.40741	1.15223	14	4.71429	2.09132	1.64286	1.00821	1.78571	1.3114	1.78571	1.52812	1.28571	0.82542	13	3.53846	1.45002	2.23077	1.36344	1.53846	0.660225	1.46154	0.967418	1.53846	1.45002	1	H	H	H		unclassified
178	asket	ascetyczny	26	2.5	1.60624	1.88462	1.33647	2.57692	1.96312	2.34615	1.59856	2.07692	1.32433	11	2.72727	1.90215	2.09091	1.51357	3.90909	2.0226	2.45455	1.50756	1.81818	1.16775	15	2.33333	1.39728	1.73333	1.2228	1.6	1.24212	2.26667	1.70992	2.26667	1.43759	1	S	none	undifferentiated		unclassified
177	askese	asceza	27	1.85185	1.43322	1.96296	1.55617	2.37037	1.69043	1.81481	1.41522	1.96296	1.34397	14	1.35714	0.841897	2.21429	1.84718	1.92857	1.49174	1.42857	0.755929	2	1.4676	13	2.38462	1.75777	1.69231	1.18213	2.84615	1.81871	2.23077	1.83275	1.92308	1.25576	1	S	none	undifferentiated		unclassified
2181	sicherung	asekuracyjny	27	3.25926	1.70051	1.59259	1.00992	1.62963	1.14852	2.92593	1.85899	1.66667	1.20894	14	3.35714	1.64584	1.85714	1.16732	1.92857	1.32806	3.64286	1.86495	1.78571	1.3114	13	3.15385	1.81871	1.30769	0.751068	1.30769	0.85485	2.15385	1.57301	1.53846	1.1266		H	none	blended	HF	unclassified
179	asozial	aspołeczny	27	1.62963	1.07946	2.40741	1.57527	3.22222	1.98714	2.96296	2.0844	2.14815	1.58609	14	1.85714	1.29241	3.07143	1.85904	3.92857	2.20015	4.07143	2.20015	2.64286	1.86495	13	1.38462	0.767948	1.69231	0.751068	2.46154	1.45002	1.76923	1.09193	1.61538	1.04391		S	none	undifferentiated		unclassified
119	angriff	atak	26	1.88462	1.60815	4.19231	1.98029	3.11538	1.9458	5	1.54919	2.96154	2.12567	12	2.08333	2.10878	4.16667	2.4058	3.75	1.91288	5.83333	1.19342	3.75	2.34036	14	1.71429	1.06904	4.21429	1.62569	2.57143	1.86936	4.28571	1.48989	2.28571	1.72888	1	F	none	undifferentiated		unclassified
182	atlas	atlas	27	3.25926	2.31371	1.22222	0.697982	1.07407	0.26688	1.22222	0.800641	1	0	14	2.85714	2.28228	1.21429	0.578934	1.07143	0.267261	1.14286	0.363137	1	0	13	3.69231	2.35884	1.23077	0.83205	1.07692	0.27735	1.30769	1.1094	1	0	1	H	none	H		N
184	atombombe	atomowy	27	2.33333	1.75412	2.44444	1.80455	2.2963	1.81479	3.03704	2.02829	2.2963	1.75005	14	1.92857	1.73046	2.21429	1.47693	2.42857	1.91007	3.57143	2.02729	2.42857	1.65084	13	2.76923	1.73944	2.69231	2.13638	2.15385	1.77229	2.46154	1.94145	2.15385	1.90815		F	none	undifferentiated		unclassified
1954	reiz	atrakcyjny	26	5.53846	1.24035	2.19231	1.85514	2.34615	2.03848	2.03846	1.77721	1.42308	0.902134	13	6	0.912871	2.53846	2.25889	2.76923	2.48843	2.38462	2.29269	1.15385	0.375534	13	5.07692	1.38212	1.84615	1.3445	1.92308	1.44115	1.69231	1.03155	1.69231	1.18213	1	H	H	H		unclassified
2425	tinte	atramentowy	27	2.33333	2.05688	1.51852	1.31179	1.40741	0.843949	1.25926	0.655896	1.18519	0.483341	14	3	2.48069	1.71429	1.63747	1.42857	0.755929	1.35714	0.744946	1.07143	0.267261	13	1.61538	1.19293	1.30769	0.85485	1.38462	0.960769	1.15385	0.5547	1.30769	0.630425	1	H	none	undifferentiated		N
233	autonom	autonomiczny	27	3.55556	2.04438	1.85185	1.2921	1.51852	1.05139	1.85185	1.16697	1.44444	0.9337	14	3.85714	2.0327	1.42857	0.755929	1.21429	0.578934	1.71429	0.99449	1.14286	0.363137	13	3.23077	2.08782	2.30769	1.60128	1.84615	1.3445	2	1.35401	1.76923	1.23517		H	none	H		unclassified
234	autorität	autorytet	26	4.96154	1.6366	1.84615	1.54123	1.53846	1.30325	2.53846	1.55514	1.61538	1.47179	13	5.38462	1.26085	2.07692	1.84669	1.84615	1.77229	2.69231	2.05688	1.61538	1.66024	13	4.53846	1.89804	1.61538	1.19293	1.23077	0.438529	2.38462	0.869718	1.61538	1.3253		H	H	H		unclassified
203	aufstieg	awans	26	5.5	1.52971	1.38462	0.941357	1.15385	0.367946	2.23077	1.45073	1.19231	0.800961	11	5.36364	1.74773	1.18182	0.40452	1.18182	0.40452	2.45455	1.96792	1	0	15	5.6	1.40408	1.53333	1.18723	1.13333	0.351866	2.06667	0.96115	1.33333	1.04654	1	H	H	H		unclassified
2340	streit	awantura	26	1.38462	1.23538	5.23077	1.83973	4.42308	1.87985	4.57692	2.08179	2.96154	2.00959	11	1.27273	0.64667	6.45455	0.934199	5.18182	1.66242	5.36364	1.9633	2.72727	1.95402	15	1.46667	1.55226	4.33333	1.83874	3.86667	1.88478	4	2.0354	3.13333	2.09989	1	A	none	blended	AFS	unclassified
1737	panne	awaria	26	1.30769	0.788377	5.07692	1.85306	3.19231	2.19124	3.69231	2.36253	2.42308	1.94264	12	1.25	0.621582	5.08333	2.15146	2.91667	2.02073	3.25	2.4168	2.5	2.11058	14	1.35714	0.928783	5.07143	1.63915	3.42857	2.37663	4.07143	2.33582	2.35714	1.86495	1	A	none	undifferentiated		A
235	aversion	awersja	27	1.40741	0.843949	3.2963	1.91783	2.2963	1.58878	2.2963	1.83586	2.92593	2.23479	14	1.21429	0.425815	3.85714	2.17882	2.28571	1.5898	2.28571	1.93862	3.21429	2.32639	13	1.61538	1.1209	2.69231	1.4367	2.30769	1.6525	2.30769	1.79743	2.61538	2.18092	1	A	none	undifferentiated		unclassified
180	asyl	azyl	27	4.62963	1.75736	1.44444	0.640513	1.88889	1.05003	2.03704	1.12597	1.48148	1.01414	14	4.28571	1.89852	1.5	0.650444	1.85714	1.16732	1.92857	1.14114	1.5	1.09193	13	5	1.58114	1.38462	0.650444	1.92308	0.954074	2.15385	1.14354	1.46154	0.967418	1	H	H	H		unclassified
765	forscher	badacz	26	3.07692	1.67148	1.76923	1.24283	1.38462	0.803837	1.80769	0.895287	1.26923	0.603834	15	3	1.77281	1.66667	0.816497	1.26667	0.593617	1.8	0.861892	1.2	0.414039	11	3.18182	1.60114	1.90909	1.70027	1.54545	1.03573	1.81818	0.98165	1.36364	0.80904	1	H	none	H		unclassified
766	forschung	badać	26	3.19231	2.17291	1.42308	0.757526	1.84615	1.34736	2.92308	1.64738	1.88462	1.50537	11	3.45455	2.33939	1.45455	0.934199	2.27273	1.55505	3.45455	1.75292	2.09091	1.8684	15	3	2.10442	1.4	0.632456	1.53333	1.12546	2.53333	1.50555	1.73333	1.2228		H	none	undifferentiated		unclassified
2358	sumpf	bagno	26	1.76923	1.45073	2.53846	1.85969	2.53846	1.79401	3.57692	2.02333	4.15385	1.91191	14	1.21429	0.578934	2.5	1.82925	3	2.2188	4	1.92154	4.57143	1.65084	12	2.41667	1.88092	2.58333	1.97523	2	0.953463	3.08333	2.10878	3.66667	2.14617	1	D	none	undifferentiated		unclassified
670	fabel	bajka	26	5.07692	1.59808	1.30769	1.19228	1.65385	1.29437	1.42308	1.27037	1.23077	1.1767	12	4.75	1.42223	1.08333	0.288675	1.66667	0.778499	1.33333	0.778499	1	0	14	5.35714	1.7368	1.5	1.60528	1.64286	1.64584	1.5	1.60528	1.42857	1.60357	1	H	H	H		unclassified
266	bazille	bakteria	26	1.61538	1.26734	2.57692	1.98339	2.38462	2.00154	4.30769	1.69161	4.19231	2.13578	14	1.07143	0.267261	2.35714	2.06089	2.35714	2.16997	4.28571	1.63747	4.5	2.10311	12	2.25	1.65831	2.83333	1.94625	2.41667	1.88092	4.33333	1.82574	3.83333	2.2088	1	F	none	blended	FD	unclassified
246	ballast	balast	27	1.59259	1.2788	3.22222	1.60128	2.48148	1.39698	2.74074	1.45688	2.18519	1.35978	14	1.42857	0.755929	3.35714	1.54955	2.64286	1.49908	2.85714	1.56191	1.85714	1.29241	13	1.76923	1.69085	3.07692	1.70595	2.30769	1.31559	2.61538	1.38675	2.53846	1.39137	1	A	none	undifferentiated		A
244	balkon	balkon	27	3.66667	2.13037	1.59259	1.24836	1.51852	0.975483	2.44444	1.73944	1.59259	1.11835	14	4.21429	1.88837	1.85714	1.35062	1.71429	1.13873	2.57143	1.78516	1.78571	1.12171	13	3.07692	2.28989	1.30769	1.1094	1.30769	0.751068	2.30769	1.75046	1.38462	1.1209	1	H	none	undifferentiated		unclassified
247	ballon	balon	26	4.03846	2.0294	1.19231	0.800961	1.19231	0.491466	1.19231	0.567044	1.07692	0.392232	12	4.41667	1.72986	1.08333	0.288675	1.16667	0.389249	1.25	0.621582	1	0	14	3.71429	2.26779	1.28571	1.06904	1.21429	0.578934	1.14286	0.534522	1.14286	0.534522	1	H	H	H		unclassified
248	balsam	balsam	26	4.03846	2.08769	1.42308	1.13747	1.42308	1.10175	1.34615	0.745241	1.73077	1.63848	13	5	1.63299	1	0	1.38462	1.38675	1.15385	0.5547	1.38462	1.1209	13	3.07692	2.10006	1.84615	1.51911	1.46154	0.77625	1.53846	0.877058	2.07692	2.01914	1	H	H	H		unclassified
250	banane	bananowy	26	4.46154	2.04413	1.57692	1.57919	1.23077	0.651625	1.15385	0.612686	1.46154	1.24035	13	4.61538	2.25605	1.23077	0.83205	1.15385	0.5547	1.23077	0.83205	1.07692	0.27735	13	4.30769	1.88788	1.92308	2.06	1.30769	0.751068	1.07692	0.27735	1.84615	1.67562	1	H	H	H		unclassified
251	bandit	bandyta	26	1.15385	0.612686	4.96154	1.6366	3.61538	2.04112	5.19231	1.85514	4.46154	2.26682	14	1.07143	0.267261	5	1.75412	3.35714	2.13423	5.28571	1.77281	4.35714	2.43712	12	1.25	0.866025	4.91667	1.56428	3.91667	1.97523	5.08333	2.02073	4.58333	2.15146	1	F	none	undifferentiated		unclassified
254	banner	baner	26	1.88462	1.55761	3.53846	2.15835	2.03846	1.61197	1.65385	1.44062	2.76923	1.86135	12	2	1.3484	4.33333	2.26969	1.75	1.21543	1.91667	1.88092	3	1.90693	14	1.78571	1.76193	2.85714	1.87523	2.28571	1.89852	1.42857	0.937614	2.57143	1.86936	1	A	none	undifferentiated		A
252	bank	bank	26	2.34615	1.59856	2.73077	2.08917	2.03846	1.6366	2.65385	1.87494	1.96154	1.84349	11	2.54545	1.36848	2.45455	1.86353	1.63636	1.02691	2.54545	1.57249	1.36364	0.924416	15	2.2	1.78085	2.93333	2.28244	2.33333	1.9518	2.73333	2.1202	2.4	2.22967	1	A	none	undifferentiated		unclassified
1825	pleite	bankructwo	26	1	0	4.88462	1.92514	4.80769	2.26308	5.46154	2.0829	3.30769	2.31118	15	1	0	5.2	1.52128	5.6	1.76473	6	1.73205	3.26667	2.08624	11	1	0	4.45455	2.38175	3.72727	2.49363	4.72727	2.37027	3.36364	2.69343		F	none	undifferentiated		unclassified
255	bar	bar	26	3.61538	1.83471	2.34615	2.11551	2.23077	1.7276	2.30769	1.56893	2.34615	1.74224	12	3	2.04495	3	2.5937	2.08333	1.78164	2.75	1.65831	3.08333	2.23437	14	4.14286	1.51186	1.78571	1.47693	2.35714	1.7368	1.92857	1.43925	1.71429	0.82542		H	none	undifferentiated		unclassified
256	barbar	barbarzyńca	26	1.46154	1.06699	4.19231	1.78928	3.5	1.96469	4.69231	1.76112	4.03846	2.21776	15	1.13333	0.516398	4.13333	1.84649	3.53333	2.03072	5.2	1.42428	4.46667	2.29492	11	1.90909	1.446	4.27273	1.79393	3.45455	1.96792	4	2	3.45455	2.06706	1	F	none	undifferentiated		unclassified
258	barriere	bariera	27	1.48148	0.752962	3.22222	1.9282	2.74074	1.89316	2.81481	1.64169	1.77778	1.39596	14	1.35714	0.497245	3.42857	1.98898	3.21429	2.08211	2.92857	1.8172	1.85714	1.65748	13	1.61538	0.960769	3	1.91485	2.23077	1.58923	2.69231	1.49358	1.69231	1.1094	1	A	none	undifferentiated		A
262	batterie	bateria	26	2.46154	1.88108	1.73077	1.18516	1.53846	0.859338	1.76923	1.0318	1.53846	1.06699	14	1.42857	0.755929	1.71429	1.20439	1.5	0.85485	1.57143	0.755929	1.57143	1.2225	12	3.66667	2.10339	1.75	1.21543	1.58333	0.900337	2	1.2792	1.5	0.904534	1	H	none	undifferentiated		N
2254	spielen	bawić	27	5.33333	1.64083	1.7037	1.2954	1.74074	1.3754	1.55556	1.2195	1.33333	0.83205	14	5.64286	1.27745	1.78571	1.52812	1.5	1.16024	1.85714	1.56191	1.42857	1.08941	13	5	1.95789	1.61538	1.04391	2	1.58114	1.23077	0.599145	1.23077	0.438529		H	H	H		unclassified
690	fasan	bażant	27	2.96296	1.48016	1.2963	0.775332	1.33333	0.784465	1.66667	1.1767	1.37037	1.00568	14	3.35714	1.59842	1.14286	0.534522	1.28571	0.61125	1.71429	1.32599	1.35714	1.08182	13	2.53846	1.26592	1.46154	0.967418	1.38462	0.960769	1.61538	1.04391	1.38462	0.960769	1	H	none	H		unclassified
1230	kreisel	bąk	27	2.44444	1.60128	1.77778	1.42325	1.48148	0.975483	2.74074	1.7887	3.07407	2.09259	14	1.92857	1.54244	1.85714	1.65748	1.28571	0.468807	3.28571	2.09132	3.35714	2.30742	13	3	1.52753	1.69231	1.18213	1.69231	1.31559	2.15385	1.21423	2.76923	1.87767	1	D	none	undifferentiated		unclassified
243	balken	belka	27	1.96296	1.34397	1.62963	1.11452	1.62963	1.14852	1.66667	1.1094	1.33333	0.784465	14	1.85714	1.09945	1.71429	1.32599	1.5	1.16024	1.78571	1.3688	1.42857	0.937614	13	2.07692	1.60528	1.53846	0.877058	1.76923	1.16575	1.53846	0.77625	1.23077	0.599145	1	H	none	undifferentiated		N
328	benzin	benzyna	26	2.5	1.88149	1.84615	1.25514	1.65385	1.12933	2.65385	1.44062	1.65385	1.19808	15	1.86667	1.30201	2.46667	1.35576	1.86667	1.30201	2.73333	1.43759	1.93333	1.43759	11	3.36364	2.24823	1	0	1.36364	0.80904	2.54545	1.50756	1.27273	0.64667	1	F	none	undifferentiated		F
348	bestie	bestia	26	1.88462	1.70474	3.23077	2.08437	3.03846	2.00959	4.65385	1.91713	3.42308	2.2122	13	2.15385	2.03495	3.69231	2.13638	3.53846	2.18386	5.46154	1.6641	4	2.12132	13	1.61538	1.3253	2.76923	2.0064	2.53846	1.76141	3.84615	1.86396	2.84615	2.23033	1	F	none	undifferentiated		unclassified
161	arg	bestialski	27	1.11111	0.320256	5.44444	1.60128	5	2.13037	5.11111	1.90815	5.2963	2.09054	14	1	0	5.78571	1.76193	5.21429	2.15473	5.64286	1.82323	5.57143	2.24343	13	1.23077	0.438529	5.07692	1.38212	4.76923	2.16617	4.53846	1.89804	5	1.95789		A	none	undifferentiated		unclassified
2290	stauchen	besztać	26	1.42308	1.23849	3.65385	1.83177	2.46154	1.74885	3.03846	1.84349	2.26923	1.53773	12	1.16667	0.389249	3.25	1.65831	2.5	1.62369	2.91667	1.56428	2.08333	0.900337	14	1.64286	1.64584	4	1.96116	2.42857	1.91007	3.14286	2.10703	2.42857	1.94992		A	none	undifferentiated		A
2749	wehrlos	bezbronny	27	1.44444	1.08604	3.48148	2.27647	4.2963	2.0346	5.44444	1.47631	2.14815	1.72546	14	1.21429	0.578934	3.71429	2.30146	4.57143	2.1018	5.85714	1.35062	2.14286	1.74784	13	1.69231	1.4367	3.23077	2.31495	4	2	5	1.52753	2.15385	1.77229		F	none	blended	FSA	unclassified
2863	ziellos	bezcelowy	26	1.19231	0.800961	3.73077	1.88802	4.03846	1.53573	2.92308	1.59808	2.34615	1.62339	12	1.33333	1.1547	3.08333	1.83196	3.83333	1.80067	3.16667	1.52753	1.75	0.965307	14	1.07143	0.267261	4.28571	1.81568	4.21429	1.3114	2.71429	1.68379	2.85714	1.91581		S	none	undifferentiated		unclassified
2083	schimpf	bezcześcić	26	1.15385	0.367946	4.92308	1.87453	4.23077	1.79572	3.57692	1.87985	4.5	2.14009	14	1.07143	0.267261	4.78571	1.96815	3.92857	1.77436	3.42857	1.82775	4	2.18386	12	1.25	0.452267	5.08333	1.83196	4.58333	1.83196	3.75	2.00567	5.08333	2.02073	1	A	none	undifferentiated		unclassified
410	bodenlos	bezdenny	26	2.26923	1.56353	1.57692	1.06482	1.92308	1.41204	2.5	1.30384	1.38462	0.941357	15	2.4	1.72378	1.6	1.12122	1.6	1.24212	2.66667	1.44749	1.33333	0.723747	11	2.09091	1.3751	1.54545	1.03573	2.36364	1.5667	2.27273	1.10371	1.45455	1.21356		F	none	undifferentiated		F
1002	herzlos	bezduszny	26	1.26923	0.77757	4.46154	2.02447	4.46154	2.0636	3.96154	2.19965	4.46154	2.42043	12	1.41667	0.996205	4.5	2.27636	4.58333	2.2747	4.08333	2.4293	4.75	2.66714	14	1.14286	0.534522	4.42857	1.86936	4.35714	1.94569	3.85714	2.0702	4.21429	2.25929		none	none	undifferentiated		unclassified
2441	tonlos	bezdźwięczny	26	1.80769	1.26552	1.76923	1.1767	2.57692	1.62906	2.19231	1.49718	1.42308	0.945434	15	1.6	1.12122	1.66667	0.9759	2.33333	1.39728	2.2	1.20712	1.26667	0.593617	11	2.09091	1.446	1.90909	1.446	2.90909	1.92117	2.18182	1.88776	1.63636	1.28629		S	none	undifferentiated		S
1212	kopflos	bezgłowy	27	1.48148	1.28214	1.96296	1.42725	2.37037	1.59683	3.22222	2.02548	3.92593	1.95971	14	1	0	2	1.51911	2.5	1.69842	4.07143	1.97929	4.14286	1.9945	13	2	1.73205	1.92308	1.38212	2.23077	1.5359	2.30769	1.70219	3.69231	1.97419		D	none	undifferentiated		D
1639	namenlos	bezimienny	26	1.38462	1.23538	2.03846	1.96938	3.69231	2.36253	3.30769	2.2763	1.53846	1.1395	12	1	0	1.91667	1.83196	4	2.3741	3.75	2.45412	1.66667	1.37069	14	1.71429	1.63747	2.14286	2.14322	3.42857	2.40878	2.92857	2.12908	1.42857	0.937614		S	none	undifferentiated		S
1663	neidlos	bezinteresowny	26	4.34615	1.87494	1.92308	1.59808	1.73077	1.40165	2	1.72047	1.26923	0.77757	13	4.38462	2.18092	2.38462	1.85016	2.15385	1.81871	2.38462	2.18092	1.15385	0.5547	13	4.30769	1.60128	1.46154	1.19829	1.30769	0.630425	1.61538	1.04391	1.38462	0.960769		H	H	H		unclassified
787	friede	bezkonfliktowy	26	4.46154	2.0636	1.46154	0.904689	1.65385	1.09334	1.76923	1.39449	1.34615	0.745241	15	5.13333	1.9223	1.33333	0.617213	1.4	0.736788	1.4	0.828079	1.2	0.414039	11	3.54545	1.96792	1.63636	1.20605	2	1.41421	2.27273	1.84883	1.54545	1.03573	1	H	H	H		unclassified
1568	mondlos	bezksiężycowy	27	2	1.35873	1.37037	0.791695	2.18519	1.46857	1.66667	1	1.25926	0.655896	14	2.14286	1.29241	1.42857	0.851631	2.71429	1.77281	2.14286	1.09945	1.28571	0.726273	13	1.84615	1.46322	1.30769	0.751068	1.61538	0.767948	1.15385	0.5547	1.23077	0.599145		S	none	undifferentiated		unclassified
2179	sicherheit	bezpieczny	26	5.73077	1.51149	1.11538	0.588348	1.23077	0.429669	1.80769	1.41476	1.19231	0.69393	14	6	1.30089	1	0	1.14286	0.363137	1.64286	1.00821	1	0	12	5.41667	1.72986	1.25	0.866025	1.33333	0.492366	2	1.80907	1.41667	0.996205		H	H	H		H
1009	hilflos	bezradny	26	1.11538	0.325813	4.30769	1.95488	4.69231	1.82799	4.11538	1.88312	2.38462	1.6267	14	1	0	4.42857	1.86936	4.35714	1.64584	3.92857	1.85904	1.92857	1.20667	12	1.25	0.452267	4.16667	2.12489	5.08333	2.02073	4.33333	1.96946	2.91667	1.92865		S	none	blended	SAF	unclassified
2895	zwecklos	bezsensowny	27	1.74074	1.48305	3.44444	2.25889	3.03704	2.15695	2.66667	2.27021	2.40741	1.9857	14	1.71429	1.20439	3.92857	2.30265	3.71429	1.9779	3	2.32048	2.57143	2.13809	13	1.76923	1.7867	2.92308	2.17798	2.30769	2.17503	2.30769	2.25036	2.23077	1.87767		A	none	undifferentiated		unclassified
1418	machtlos	bezsilny	27	1.14815	0.456045	4.88889	1.8674	3.96296	1.91113	3.62963	2.04089	1.92593	1.54237	14	1.14286	0.363137	5.21429	2.00686	4.42857	2.24343	4.35714	2.09788	1.85714	1.29241	13	1.15385	0.5547	4.53846	1.71345	3.46154	1.39137	2.84615	1.72463	2	1.82574		A	none	blended	ASF	unclassified
2776	wertlos	bezwartościowy	27	1.25926	0.944319	3	1.64083	3.92593	1.87956	2.7037	2.05342	2.7037	1.89767	14	1.28571	1.06904	3.42857	1.82775	3.85714	2.10703	2.92857	2.09263	2.64286	1.90575	13	1.23077	0.83205	2.53846	1.33012	4	1.68325	2.46154	2.06621	2.76923	1.96443		S	none	undifferentiated		unclassified
2492	trommel	bęben	26	3.23077	2.32048	1.69231	1.19228	1.11538	0.588348	1.42308	0.808608	1.11538	0.588348	11	3	1.84391	2.09091	1.51357	1.27273	0.904534	1.63636	1.02691	1.27273	0.904534	15	3.4	2.66726	1.4	0.828079	1	0	1.26667	0.593617	1	0	1	H	none	H		unclassified
261	bastard	bękart	26	1.11538	0.431455	3.65385	2.03848	3.53846	1.9643	2.88462	2.00653	2.80769	2.09798	13	1	0	4.07692	2.13937	3.46154	1.76141	3.23077	1.73944	2.76923	1.92154	13	1.23077	0.599145	3.23077	1.92154	3.61538	2.2188	2.53846	2.25889	2.84615	2.33973	1	A	none	undifferentiated		unclassified
852	gejammer	biadolić	27	1.51852	1.28214	4.14815	1.58609	2.22222	1.71718	1.62963	1.39085	2.66667	1.92154	14	1.42857	1.15787	4.64286	1.78054	2.07143	1.8172	1.64286	1.59842	2.5	2.02864	13	1.61538	1.44559	3.61538	1.19293	2.38462	1.66024	1.61538	1.19293	2.84615	1.86396	1	A	none	A		A
377	bibel	biblijny	26	2.23077	1.86135	1.5	0.989949	1.42308	0.757526	1.69231	0.970329	1.61538	1.0612	12	1.75	0.965307	1.58333	1.24011	1.25	0.621582	1.5	0.797724	1.33333	0.651339	14	2.64286	2.34052	1.42857	0.755929	1.57143	0.851631	1.85714	1.09945	1.85714	1.29241	1	H	none	undifferentiated		N
1773	peitsche	bicz	26	1.5	0.989949	3.19231	1.98029	2.84615	1.75937	4.46154	1.94383	3.57692	2.15728	13	1.46154	0.877058	3.76923	2.31495	3.53846	2.02548	5.46154	1.8081	4	2.38048	13	1.53846	1.1266	2.61538	1.44559	2.15385	1.14354	3.46154	1.56074	3.15385	1.90815	1	F	none	undifferentiated		unclassified
2091	schlagen	bić	26	1.38462	0.803837	4.65385	1.6957	3.88462	1.88312	4.53846	1.85969	3.65385	2.15299	12	1.16667	0.57735	4.5	1.50756	3.91667	1.56428	4.25	1.3568	3.66667	2.01509	14	1.57143	0.937614	4.78571	1.88837	3.85714	2.17882	4.78571	2.22498	3.64286	2.34052		A	none	undifferentiated		unclassified
1961	rennen	biec	27	3.55556	2.0064	1.92593	1.46566	1.48148	1.01414	2.40741	1.82418	1.48148	1.25178	14	2.78571	1.67233	1.78571	1.52812	1.42857	1.08941	2.42857	1.82775	1.71429	1.63747	13	4.38462	2.06311	2.07692	1.44115	1.53846	0.967418	2.38462	1.89466	1.23077	0.599145		H	none	undifferentiated		unclassified
166	armut	bieda	27	1.07407	0.26688	4.62963	1.90441	5.74074	1.45688	5.66667	1.68705	2.7037	2.30075	14	1.07143	0.267261	4.78571	1.96815	5.92857	1.32806	5.92857	1.8172	2.5	2.50384	13	1.07692	0.27735	4.46154	1.89804	5.53846	1.61325	5.38462	1.55662	2.92308	2.13937	1	S	none	blended	SFA	unclassified
1521	mikado	bierki	26	3.80769	1.76679	1.80769	1.44275	1.46154	0.947872	1.38462	0.752432	1.26923	0.724303	12	4.16667	1.74946	1.66667	1.07309	1.33333	0.651339	1.33333	0.778499	1.16667	0.57735	14	3.5	1.7867	1.92857	1.73046	1.57143	1.15787	1.42857	0.755929	1.35714	0.841897	1	H	H	H		unclassified
2537	umtrunk	biesiada	26	5	1.6	1.88462	1.21085	1.38462	0.897861	1.84615	1.1897	1.69231	1.22537	14	4.35714	1.78054	2.14286	1.40642	1.57143	1.15787	1.71429	1.32599	2.07143	1.54244	12	5.75	0.965307	1.58333	0.900337	1.16667	0.389249	2	1.04447	1.25	0.452267	1	H	H	H		unclassified
1281	laufbahn	bieżnia	26	3.61538	2.11805	1.84615	1.28662	1.23077	0.514408	1.69231	1.19228	1.42308	0.945434	12	2.91667	1.83196	2	1.41421	1.25	0.621582	1.5	1.24316	1.66667	1.23091	14	4.21429	2.22498	1.71429	1.20439	1.21429	0.425815	1.85714	1.16732	1.21429	0.578934	1	H	none	H		unclassified
383	bikini	bikini	26	4.42308	1.98339	1.26923	0.603834	1.73077	1.31325	1.57692	1.02657	1.53846	0.904689	14	3.42857	1.94992	1.35714	0.633324	1.92857	1.59153	1.64286	1.15073	1.71429	1.06904	12	5.58333	1.31137	1.16667	0.57735	1.5	0.904534	1.5	0.904534	1.33333	0.651339	1	H	H	H		unclassified
384	bilanz	bilans	26	2.23077	1.81786	1.57692	1.13747	1.69231	1.19228	2.07692	1.19743	1.26923	0.874423	12	2.58333	2.15146	1.16667	0.57735	1.58333	1.24011	1.83333	1.11464	1.08333	0.288675	14	1.92857	1.49174	1.92857	1.38477	1.78571	1.18831	2.28571	1.26665	1.42857	1.15787	1	H	none	undifferentiated		unclassified
392	bischof	biskup	27	2	1.49358	2.88889	2.13638	2.18519	1.77671	1.55556	1.39596	2.22222	2.0064	14	2	1.51911	2.42857	1.82775	1.64286	1.7368	1.42857	1.60357	1.85714	1.74784	13	2	1.52753	3.38462	2.39925	2.76923	1.69085	1.69231	1.18213	2.61538	2.25605	1	A	none	undifferentiated		unclassified
2086	schlacht	bitwa	27	2.37037	1.57256	3.59259	1.9857	2.92593	1.7743	3.96296	2.0844	2.40741	1.69296	14	2	1.6641	3.5	1.6525	3.07143	2.09263	4.42857	2.24343	2.64286	1.69193	13	2.76923	1.42325	3.69231	2.35884	2.76923	1.42325	3.46154	1.85362	2.15385	1.72463	1	F	none	undifferentiated		unclassified
451	büro	biurowy	26	2.23077	1.33589	1.92308	1.12865	2.11538	1.39505	2.23077	1.55712	2.38462	1.94066	15	1.86667	0.99043	2.2	1.26491	2.33333	1.39728	2.4	1.59463	2.46667	1.88478	11	2.72727	1.61808	1.54545	0.8202	1.81818	1.4013	2	1.54919	2.27273	2.10195	1	D	none	undifferentiated		unclassified
454	busen	biust	27	5.44444	2.02548	1.2963	0.724028	1.44444	1.1209	1.37037	0.92604	1.11111	0.423659	14	4.78571	2.15473	1.14286	0.363137	1.14286	0.534522	1.35714	0.928783	1	0	13	6.15385	1.67562	1.46154	0.967418	1.76923	1.48064	1.38462	0.960769	1.23077	0.599145	1	H	H	H		H
2106	schmuck	biżuteria	26	3.53846	2.35339	1.53846	1.30325	1.30769	0.679366	1.15385	0.464095	1.42308	1.06482	12	3.66667	2.34844	1.25	0.621582	1.16667	0.57735	1.16667	0.57735	1.25	0.621582	14	3.42857	2.4405	1.78571	1.67233	1.42857	0.755929	1.14286	0.363137	1.57143	1.34246	1	H	none	H		unclassified
907	glanz	blask	26	4.65385	1.46812	1.30769	0.617688	1.5	1.02956	1.53846	0.989172	1.19231	0.567044	15	4.73333	1.57963	1.4	0.736788	1.46667	1.0601	1.6	0.985611	1.2	0.560612	11	4.54545	1.36848	1.18182	0.40452	1.54545	1.03573	1.45455	1.03573	1.18182	0.603023	1	H	H	H		unclassified
1634	nah	bliski	26	5.73077	1.4299	1.19231	0.633671	2.07692	1.59808	2.57692	1.62906	1.19231	0.567044	13	6.07692	1.25576	1	0	2.30769	2.01596	2.46154	1.85362	1	0	13	5.38462	1.55662	1.38462	0.869718	1.84615	1.06819	2.69231	1.4367	1.38462	0.767948		H	H	H		unclassified
1635	nähe	bliskość	26	5.84615	1.15559	1.5	0.812404	2.07692	1.41204	2.23077	1.53121	1.26923	0.533494	14	5.85714	1.23146	1.71429	0.99449	2.57143	1.6968	2.78571	1.57766	1.35714	0.633324	12	5.83333	1.11464	1.25	0.452267	1.5	0.6742	1.58333	1.24011	1.16667	0.389249	1	H	H	H		unclassified
1641	narbe	blizna	27	1.37037	1.07946	3	1.96116	3.48148	1.88864	3.25926	1.93336	3.03704	1.91113	14	1.42857	1.08941	3.28571	2.16364	4.28571	1.77281	3.78571	1.84718	3.78571	1.88837	13	1.30769	1.1094	2.69231	1.75046	2.61538	1.66024	2.69231	1.93152	2.23077	1.64083	1	S	none	undifferentiated		unclassified
402	blondine	blondynka	26	4.15385	2.14834	1.57692	0.945434	1.46154	0.947872	1.26923	0.827415	1.30769	0.617688	12	3.5	2.35488	1.75	1.21543	1.25	0.621582	1.16667	0.389249	1.33333	0.651339	14	4.71429	1.85757	1.42857	0.646206	1.64286	1.15073	1.35714	1.08182	1.28571	0.61125	1	H	H	H		unclassified
404	bluse	bluzka	26	3.23077	2.00614	1.38462	0.697247	1.38462	0.803837	1.46154	0.989172	1.23077	0.992278	15	3.2	2.11119	1.33333	0.617213	1.33333	0.617213	1.46667	0.833809	1	0	11	3.27273	1.95402	1.45455	0.8202	1.45455	1.03573	1.45455	1.21356	1.54545	1.50756	1	H	none	H		unclassified
2790	winseln	błagalny	27	1.77778	1.28103	2.66667	1.49358	3.66667	2.0755	2.77778	1.90815	2.48148	1.74026	14	1.71429	1.13873	2.35714	1.27745	3.57143	2.31099	2.85714	2.28228	2.28571	1.77281	13	1.84615	1.46322	3	1.68325	3.76923	1.87767	2.69231	1.49358	2.69231	1.75046		S	none	undifferentiated		unclassified
1644	narr	błazen	26	2.03846	1.61197	2.5	1.72627	2.76923	1.65669	1.57692	1.13747	2.42308	1.8368	12	2.16667	1.6967	2	1.70561	2.58333	1.37895	1.58333	1.1645	2.08333	1.50504	14	1.92857	1.59153	2.92857	1.68543	2.92857	1.89997	1.57143	1.15787	2.71429	2.09132	1	S	none	undifferentiated		unclassified
700	fehler	błąd	26	1.26923	0.874423	4.69231	1.78369	4.26923	2.25491	4.11538	2.00653	2.26923	1.66271	11	1.18182	0.603023	4.81818	1.77866	4.54545	2.38175	3.90909	2.16585	1.90909	1.13618	15	1.33333	1.04654	4.6	1.84391	4.06667	2.21897	4.26667	1.94447	2.53333	1.95911	1	A	none	blended	ASF	unclassified
2155	segen	błogosławić	26	4.34615	1.95841	2	1.9799	2	1.83303	1.92308	1.76461	1.65385	1.5477	12	4.58333	2.06522	2.25	2.37888	2.33333	2.34844	2.58333	2.31432	1.75	1.86474	14	4.14286	1.91581	1.78571	1.62569	1.71429	1.26665	1.35714	0.841897	1.57143	1.28388	1	H	H	H		unclassified
2156	segnen	błogosławiony	26	4.69231	1.78369	1.30769	0.679366	1.34615	0.891843	1.42308	1.06482	1.11538	0.431455	13	5.23077	1.16575	1.07692	0.27735	1.15385	0.375534	1.15385	0.375534	1	0	13	4.15385	2.1543	1.53846	0.877058	1.53846	1.19829	1.69231	1.4367	1.23077	0.599145		H	H	H		unclassified
2268	spritzig	błyskotliwy	26	4.76923	1.60767	1.34615	0.745241	1.38462	0.803837	1.46154	0.859338	1.19231	0.633671	11	5.36364	1.43337	1.63636	1.02691	1.63636	1.02691	1.90909	1.13618	1.27273	0.904534	15	4.33333	1.63299	1.13333	0.351866	1.2	0.560612	1.13333	0.351866	1.13333	0.351866		H	H	H		unclassified
2323	storch	bocian	26	4.38462	2.04112	1.07692	0.271746	1.30769	0.788377	1.42308	1.06482	1.26923	0.666795	14	4.14286	2.14322	1.14286	0.363137	1.14286	0.534522	1.5	1.3445	1.42857	0.851631	12	4.66667	1.96946	1	0	1.5	1	1.33333	0.651339	1.08333	0.288675	1	H	H	H		unclassified
2486	trieb	bodziec	27	2.62963	1.73534	2.18519	1.79823	1.37037	0.791695	2.22222	1.69464	1.96296	1.45395	14	2.64286	1.86495	1.71429	1.48989	1.42857	0.937614	1.92857	1.49174	1.71429	1.43734	13	2.61538	1.66024	2.69231	2.01596	1.30769	0.630425	2.53846	1.89804	2.23077	1.48064	1	H	none	undifferentiated		unclassified
1943	reichtum	bogaty	27	4.59259	2.18842	2.37037	1.59683	1.7037	1.17063	1.7037	1.1373	1.92593	1.43918	14	4.85714	2.31574	2.21429	1.25137	1.71429	1.20439	1.64286	1.21574	1.78571	1.18831	13	4.30769	2.09701	2.53846	1.94145	1.69231	1.18213	1.76923	1.09193	2.07692	1.70595	1	H	H	H		unclassified
985	held	bohaterski	26	4.5	1.70294	1.61538	1.09825	1.73077	1.15092	1.57692	0.902134	1.11538	0.431455	12	4.58333	1.92865	1.41667	0.668558	1.75	0.965307	1.66667	0.984732	1	0	14	4.42857	1.55486	1.78571	1.3688	1.71429	1.32599	1.5	0.85485	1.21429	0.578934	1	H	H	H		unclassified
2825	zaghaft	bojaźliwy	27	1.48148	1.01414	2.11111	1.36814	2.88889	1.90815	3.7037	2.39896	2.03704	1.53125	14	1.5	1.09193	2.57143	1.65084	3.64286	1.94569	4.5	2.40992	2.57143	1.86936	13	1.46154	0.967418	1.61538	0.767948	2.07692	1.5525	2.84615	2.1543	1.46154	0.77625		F	none	undifferentiated		F
1306	leiden	boleć	26	1.11538	0.431455	4.07692	2.15264	4.76923	2.17821	4.69231	2.14978	2.53846	2.1951	11	1	0	4.18182	2.18258	6	1.34164	5.90909	1.446	2.36364	1.85864	15	1.2	0.560612	4	2.20389	3.86667	2.26358	3.8	2.17781	2.66667	2.46885		S	none	blended	SFA	unclassified
2853	zerrung	bolesny	27	1.40741	1.11835	3.40741	1.67008	4.55556	1.82574	4.25926	2.15893	3.2963	1.83586	14	1.42857	1.15787	3.5	1.7867	5.5	1.28602	5.07143	2.05555	4	1.92154	13	1.38462	1.1209	3.30769	1.60128	3.53846	1.8081	3.38462	1.98068	2.53846	1.45002	1	S	none	undifferentiated		unclassified
414	bombe	bomba	26	1.69231	1.4634	3.96154	2.35764	3.92308	2.52861	5.38462	2.13686	3.61538	2.68443	11	1	0	4.72727	2.3277	5.09091	1.97254	6.18182	1.07872	4.36364	2.65604	15	2.2	1.78085	3.4	2.29285	3.06667	2.60403	4.8	2.54109	3.06667	2.65832	1	F	none	undifferentiated		unclassified
415	bomber	bombowiec	26	1.69231	1.40767	3.38462	2.2817	3.26923	2.01112	4.38462	2.11805	2.96154	2.19965	11	1.27273	0.904534	4.45455	2.33939	4.09091	2.2563	5.45455	1.63485	3.45455	2.11488	15	2	1.64751	2.6	1.95667	2.66667	1.63299	3.6	2.1314	2.6	2.26148	1	F	none	undifferentiated		unclassified
463	dachs	borsuk	26	2.26923	1.61388	1.5	0.905539	1.5	0.989949	1.84615	1.28662	1.57692	1.23849	15	2.4	1.84391	1.46667	0.99043	1.4	0.828079	1.73333	1.0328	1.6	1.40408	11	2.09091	1.30035	1.54545	0.8202	1.63636	1.20605	2	1.61245	1.54545	1.03573	1	H	none	undifferentiated		N
378	biber	bóbr	27	3.92593	2.0367	1.2963	0.724028	1.2963	0.6688	1.77778	1.1547	1.48148	0.893152	14	3.57143	1.74154	1.35714	0.841897	1.21429	0.425815	2.07143	1.26881	1.35714	0.744946	13	4.30769	2.32324	1.23077	0.599145	1.38462	0.869718	1.46154	0.967418	1.61538	1.04391	1	H	H	H		unclassified
917	gott	bóg	26	4.57692	2.06249	2.15385	1.78196	2.57692	1.92194	3.15385	1.99384	1.84615	1.61722	12	5.25	2.0505	1.83333	1.85047	2.33333	2.14617	3.08333	2.2747	1.83333	1.74946	14	4	1.96116	2.42857	1.74154	2.78571	1.76193	3.21429	1.80506	1.85714	1.56191	1	H	none	H		unclassified
2104	schmerz	ból	27	1.51852	1.28214	3.96296	1.91113	4.62963	2.13304	4.62963	1.86358	3.55556	2.29269	14	1.42857	1.34246	4.28571	1.9779	5.28571	2.09132	5.21429	1.71772	4.28571	2.39963	13	1.61538	1.26085	3.61538	1.85016	3.92308	2.01914	4	1.87083	2.76923	1.96443	1	none	none	undifferentiated		unclassified
1660	nehmen	brać	26	3.15385	1.66595	2.30769	1.4634	2.11538	1.47856	2	1.38564	2.15385	1.64176	13	3.46154	1.76141	2.38462	1.50214	2.23077	1.87767	2	1.52753	2	1.87083	13	2.84615	1.57301	2.23077	1.48064	2	1	2	1.29099	2.30769	1.4367		H	none	undifferentiated		unclassified
1450	mangel	brak	27	1.25926	0.594371	4.11111	1.94804	4.7037	1.89767	4.37037	2.07824	1.96296	1.74271	14	1.35714	0.633324	4.57143	2.27746	5.14286	1.95555	4.71429	2.1989	1.92857	1.77436	13	1.15385	0.5547	3.61538	1.44559	4.23077	1.7867	4	1.95789	2	1.77951	1	S	none	blended	SFA	unclassified
699	fehlen	brakować	27	1.11111	0.320256	4.2963	1.70553	5.40741	1.69296	5.25926	1.70051	2.62963	2.18646	14	1.14286	0.363137	4.5	1.55662	5.35714	1.59842	5.28571	1.5898	2.71429	2.43148	13	1.07692	0.27735	4.07692	1.89128	5.46154	1.85362	5.23077	1.87767	2.53846	1.98391		S	none	blended	SFA	unclassified
436	bruder	brat	27	4.59259	2.30817	2.48148	1.98785	2.03704	1.698	1.7037	1.46274	1.37037	1.11452	14	4.71429	2.46291	2.35714	1.98483	1.78571	1.47693	1.42857	1.08941	1.28571	0.82542	13	4.46154	2.22169	2.61538	2.06311	2.30769	1.93152	2	1.77951	1.46154	1.39137	1	H	none	H		unclassified
433	bronze	brąz	27	3.03704	1.84977	1.77778	1.39596	1.55556	0.800641	1.33333	0.960769	1.33333	0.919866	14	3.71429	1.68379	2	1.75412	1.5	0.759555	1.57143	1.28388	1.5	1.16024	13	2.30769	1.79743	1.53846	0.877058	1.61538	0.869718	1.07692	0.27735	1.15385	0.5547	1	H	none	H		unclassified
2737	warze	brodawka	26	1.80769	1.62528	2.23077	1.7276	2.11538	1.70474	2.42308	2.00346	3.84615	2.2573	11	1.45455	1.50756	2.09091	1.7581	2	1.67332	2.72727	2.24013	4.36364	2.61812	15	2.06667	1.70992	2.33333	1.75933	2.2	1.78085	2.2	1.85934	3.46667	1.95911	1	D	none	undifferentiated		D
2748	wehren	bronić	27	4	2.05688	2.44444	1.45002	2.2963	1.63648	2.85185	1.63387	1.37037	0.687702	14	3.92857	2.09263	2.07143	1.38477	2.14286	1.35062	3.21429	1.57766	1.28571	0.61125	13	4.07692	2.10006	2.84615	1.46322	2.46154	1.94145	2.46154	1.6641	1.46154	0.77625		H	none	undifferentiated		unclassified
2712	waffe	broń	26	1.5	1.14018	2.73077	1.75631	2.03846	1.37057	3.92308	1.89574	2.65385	1.87494	12	1.66667	1.49747	2.5	1.5667	1.5	0.522233	3.58333	1.31137	2.25	1.3568	14	1.35714	0.744946	2.92857	1.94004	2.5	1.69842	4.21429	2.29309	3	2.2188	1	F	none	undifferentiated		F
2107	schmutz	brud	26	1.5	1.42127	3.88462	2.06547	3.07692	2.22572	2.84615	2.12964	4.96154	1.84349	15	1.26667	1.0328	3.53333	2.26358	2.66667	1.83874	2.73333	1.98086	4.6	1.88225	11	1.81818	1.83402	4.36364	1.74773	3.63636	2.65604	3	2.40832	5.45455	1.75292	1	D	none	undifferentiated		unclassified
2288	stau	brudny	26	1.53846	0.947872	2.69231	1.73826	2.38462	1.60192	2.38462	1.49872	4.26923	2.01112	12	1.5	0.904534	2.33333	1.23091	2.33333	1.23091	2.91667	1.24011	4	1.4771	14	1.57143	1.01635	3	2.0755	2.42857	1.91007	1.92857	1.59153	4.5	2.40992	1	D	none	D		D
439	brutal	brutalny	26	1.34615	0.891843	4.03846	1.79957	2.84615	1.99384	4.34615	1.85348	3.19231	2.03998	12	1	0	4	2	3.08333	2.02073	4.58333	1.67649	3.25	1.91288	14	1.64286	1.15073	4.07143	1.68543	2.64286	2.02322	4.14286	2.0327	3.14286	2.21384		F	none	undifferentiated		unclassified
429	brigade	brygada	26	3.11538	1.58308	1.96154	1.61197	2.07692	1.89574	2.26923	1.71015	1.34615	0.79711	13	2.23077	1.01274	2.76923	1.96443	2.76923	2.27866	3.07692	1.97744	1.38462	0.869718	13	4	1.58114	1.15385	0.375534	1.38462	1.1209	1.46154	0.877058	1.30769	0.751068	1	H	none	undifferentiated		unclassified
430	brillant	brylantowy	26	4.76923	1.86135	1.23077	0.58704	1.38462	0.803837	1.73077	1.21845	1.19231	0.567044	15	4.4	2.09762	1.33333	0.723747	1.33333	0.617213	1.8	1.32017	1.2	0.560612	11	5.27273	1.42063	1.09091	0.301511	1.45455	1.03573	1.63636	1.12006	1.18182	0.603023		H	H	H		unclassified
432	britisch	brytyjski	27	4.11111	2.20721	1.51852	1.12217	1.59259	0.930643	1.66667	1.1767	1.51852	1.12217	14	4.71429	2.46291	1.71429	1.48989	1.35714	0.928783	1.78571	1.3688	1.57143	1.28388	13	3.46154	1.76141	1.30769	0.480384	1.84615	0.898717	1.53846	0.967418	1.46154	0.967418		H	H	H		unclassified
2439	ton	brzmieć	26	2.80769	1.83345	1.65385	1.16421	1.57692	1.23849	1.42308	1.06482	1.07692	0.271746	15	3.13333	2.03072	1.73333	1.27988	1.73333	1.48645	1.6	1.35225	1.06667	0.258199	11	2.36364	1.50151	1.54545	1.03573	1.36364	0.80904	1.18182	0.40452	1.09091	0.301511		H	none	H		N
390	birke	brzoza	26	3.46154	1.72582	1.5	1.24097	1.92308	1.49461	1.15385	0.612686	1.23077	0.710363	13	3.84615	1.81871	1.07692	0.27735	2.23077	1.83275	1	0	1	0	13	3.07692	1.60528	1.92308	1.65638	1.61538	1.04391	1.30769	0.85485	1.46154	0.967418	1	H	none	H		unclassified
442	buddha	budda	27	3.18519	2.30446	1.62963	1.54791	1.40741	1.08342	1.37037	1.00568	1.22222	1.1547	14	3.07143	2.36852	1.5	1.60528	1.14286	0.363137	1.14286	0.363137	1	0	13	3.30769	2.32324	1.76923	1.5359	1.69231	1.49358	1.61538	1.38675	1.46154	1.6641	1	H	none	H		unclassified
263	bauen	budować	26	4.34615	1.57334	1.30769	0.735893	1.5	0.948683	2.11538	1.50537	1.15385	0.612686	12	4.41667	1.31137	1.33333	0.887625	1.66667	1.1547	1.66667	1.37069	1.25	0.866025	14	4.28571	1.81568	1.28571	0.61125	1.35714	0.744946	2.5	1.55662	1.07143	0.267261		H	H	H		unclassified
2741	wecken	budzić	27	2.85185	1.87501	2.62963	1.96406	2.18519	1.75493	1.88889	1.33973	1.62963	1.27545	14	3.42857	1.98898	2.78571	1.76193	2.21429	1.62569	1.92857	1.14114	1.42857	0.646206	13	2.23077	1.58923	2.46154	2.22169	2.15385	1.95133	1.84615	1.57301	1.84615	1.72463		H	none	undifferentiated		unclassified
2742	wecker	budzik	26	1.88462	1.39505	4.42308	1.8149	2.80769	1.60048	1.96154	1.42775	2.65385	2.20803	11	1.81818	1.32802	4.90909	1.51357	2.54545	1.4397	1.63636	1.02691	1.90909	1.81409	15	1.93333	1.48645	4.06667	1.98086	3	1.73205	2.2	1.65616	3.2	2.36643	1	A	none	A		A
441	buche	buk	27	3.03704	1.87045	1.51852	1.31179	1.33333	0.784465	1.37037	0.83887	1.37037	0.92604	14	3.07143	1.85904	1.28571	0.82542	1.14286	0.534522	1.35714	0.928783	1.21429	0.578934	13	3	1.95789	1.76923	1.69085	1.53846	0.967418	1.38462	0.767948	1.53846	1.19829	1	H	none	H		unclassified
2335	strauß	bukiet	26	5	1.74356	1.46154	1.1395	1.61538	1.0612	1.23077	0.514408	1.11538	0.431455	12	5.08333	1.37895	1.16667	0.57735	1.33333	0.651339	1.16667	0.57735	1.16667	0.57735	14	4.92857	2.05555	1.71429	1.43734	1.85714	1.29241	1.28571	0.468807	1.07143	0.267261	1	H	H	H		unclassified
446	bumerang	bumerang	26	2.92308	1.54721	1.34615	0.891843	1.19231	0.633671	1.53846	0.904689	1.26923	0.724303	12	3.08333	1.31137	1.33333	0.651339	1.08333	0.288675	1.5	0.797724	1.25	0.621582	14	2.78571	1.76193	1.35714	1.08182	1.28571	0.82542	1.57143	1.01635	1.28571	0.82542	1	H	none	H		N
448	bunker	bunkier	26	2.34615	1.83177	2.42308	1.98339	2.92308	2.05763	3.73077	2.20105	2.80769	2.3155	11	1.72727	1.67874	2.90909	2.2563	3.72727	2.24013	5.09091	1.8684	3.54545	2.80584	15	2.8	1.85934	2.06667	1.75119	2.33333	1.75933	2.73333	1.90738	2.26667	1.79151	1	F	none	undifferentiated		unclassified
1512	meuterei	bunt	26	1.80769	1.44275	4.42308	2.2658	3.03846	2.18139	3.30769	2.09321	2.46154	1.94383	11	1.81818	1.25045	4.72727	2.05382	3.54545	2.16165	4	2.23607	1.90909	1.57826	15	1.8	1.61245	4.2	2.45531	2.66667	2.19306	2.8	1.89737	2.86667	2.13363	1	A	none	undifferentiated		unclassified
1920	rebell	buntownik	26	2.61538	1.96116	3.73077	1.86671	1.92308	1.19743	2.88462	1.70474	1.88462	1.39505	12	3.25	2.17945	3.41667	1.88092	1.58333	0.996205	3.08333	1.92865	1.83333	1.40346	14	2.07143	1.63915	4	1.88108	2.21429	1.3114	2.71429	1.54066	1.92857	1.43925	1	A	none	undifferentiated		A
2066	schelte	bura	27	1.66667	1.1094	2.51852	1.57798	2.51852	1.84746	1.96296	1.45395	2.11111	1.50214	14	1.42857	0.851631	2.42857	1.60357	2.78571	2.29309	2.21429	1.80506	2.14286	1.65748	13	1.92308	1.32045	2.61538	1.60927	2.23077	1.23517	1.69231	0.947331	2.07692	1.38212	1	none	none	undifferentiated		unclassified
896	gewitter	burzowy	27	2.55556	1.94804	2.22222	1.88788	2.11111	1.39596	3.44444	1.80455	1.62963	1.62073	14	2.5	2.13937	2.35714	2.37316	1.71429	1.13873	3.78571	2.04483	1.5	1.60528	13	2.61538	1.80455	2.07692	1.25576	2.53846	1.56074	3.07692	1.49786	1.76923	1.69085	1	F	none	undifferentiated		F
2126	schuh	but	27	2.81481	1.88184	1.37037	0.791695	1.44444	1.01274	1.40741	0.930643	1.51852	1.01414	14	3	1.83973	1.35714	0.633324	1.35714	0.633324	1.28571	0.726273	1.28571	0.61125	13	2.61538	1.98068	1.38462	0.960769	1.53846	1.33012	1.53846	1.1266	1.76923	1.30089	1	H	none	H		N
737	flasche	butelka	26	2.73077	1.86671	1.76923	1.47804	1.69231	1.54322	1.84615	1.51505	1.65385	1.16421	11	2.72727	1.73729	2.27273	2.00454	2.45455	2.16165	2.63636	1.91169	2	1.41421	15	2.73333	2.0166	1.4	0.828079	1.13333	0.351866	1.26667	0.798809	1.4	0.910259	1	H	none	undifferentiated		unclassified
444	bulle	byczy	26	3	2.05913	2	1.64924	1.53846	1.06699	2.30769	1.34964	1.84615	1.25514	15	2.73333	2.08624	2.13333	1.84649	1.66667	1.17514	2.4	1.40408	1.93333	1.33452	11	3.36364	2.06265	1.81818	1.4013	1.36364	0.924416	2.18182	1.32802	1.72727	1.19087	1	H	none	undifferentiated		unclassified
2315	stier	byk	26	2.26923	1.61388	2.76923	1.96586	1.57692	0.856648	4.07692	1.78713	2.15385	1.4613	14	2	1.75412	2.64286	2.16997	1.42857	0.755929	4.21429	2.00686	1.78571	1.0509	12	2.58333	1.44338	2.91667	1.78164	1.75	0.965307	3.91667	1.56428	2.58333	1.78164	1	F	none	F		F
67	agil	bystry	26	4.76923	1.81786	1.46154	1.24035	1.19231	0.491466	1.65385	1.57334	1.15385	0.367946	12	5.16667	1.58592	1.66667	1.72328	1.25	0.621582	1.5	1.446	1.25	0.452267	14	4.42857	1.98898	1.28571	0.61125	1.14286	0.363137	1.78571	1.71772	1.07143	0.267261		H	H	H		unclassified
472	dasein	byt	26	2.96154	1.94896	1.69231	1.4634	1.96154	1.6366	2.34615	1.85348	1.73077	1.53773	12	2.58333	1.88092	1.41667	0.900337	1.83333	1.33712	1.75	1.13818	1.58333	1.1645	14	3.28571	2.01642	1.92857	1.8172	2.07143	1.89997	2.85714	2.21384	1.85714	1.83375	1	H	none	undifferentiated		unclassified
2565	unsinn	bzdura	27	1.55556	0.9337	3.81481	2.0388	1.88889	1.45002	2.11111	1.62512	2.55556	1.8674	14	1.42857	0.646206	4	2.41788	2.07143	1.68543	2.5	1.87083	2.92857	2.23484	13	1.69231	1.18213	3.61538	1.60927	1.69231	1.18213	1.69231	1.25064	2.15385	1.3445	1	A	none	undifferentiated		A
1260	küssen	całować	26	5.84615	1.15559	1.11538	0.325813	1.30769	0.735893	1.30769	0.788377	1.19231	0.567044	12	5.5	1.08711	1.16667	0.389249	1.33333	0.887625	1.33333	0.887625	1.08333	0.288675	14	6.14286	1.16732	1.07143	0.267261	1.28571	0.61125	1.28571	0.726273	1.28571	0.726273		H	H	H		H
2898	zwiebel	cebulowy	27	1.96296	1.31505	1.66667	1.41421	1.62963	1.30526	1.37037	0.883531	2.03704	1.48016	14	2.21429	1.52812	1.92857	1.77436	2	1.6641	1.42857	0.937614	2.35714	1.78054	13	1.69231	1.03155	1.38462	0.869718	1.23077	0.599145	1.30769	0.85485	1.69231	1.03155	1	D	none	undifferentiated		N
1506	merkmal	cecha	26	2.5	1.67929	2.07692	1.62291	1.53846	0.989172	1.76923	1.45073	1.53846	1.10384	12	2	1.20605	2.08333	1.83196	1.5	1	1.83333	1.64225	1.5	0.904534	14	2.92857	1.94004	2.07143	1.49174	1.57143	1.01635	1.71429	1.32599	1.57143	1.28388	1	H	none	undifferentiated		unclassified
2860	ziegel	ceglany	26	2.53846	1.47596	1.23077	0.58704	1.46154	0.904689	1.73077	1.18516	1.46154	1.10384	14	2.07143	1.20667	1.21429	0.578934	1.57143	1.15787	1.92857	1.43925	1.14286	0.534522	12	3.08333	1.62135	1.25	0.621582	1.33333	0.492366	1.5	0.797724	1.83333	1.4668	1	H	none	undifferentiated		N
2894	zweck	cel	26	4.84615	1.80427	1.76923	1.0318	2	1.13137	3	2.03961	1.42308	1.02657	12	4.75	1.71226	1.75	1.13818	1.75	0.965307	2.5	1.67874	1.41667	0.900337	14	4.92857	1.94004	1.78571	0.974961	2.21429	1.25137	3.42857	2.27746	1.42857	1.15787	1	H	H	H		unclassified
2848	zelle	cela	27	1.48148	1.05139	2.92593	2.0555	3.37037	1.9245	3.96296	2.02829	2.92593	2.01773	14	1.14286	0.534522	3.5	2.21012	3.21429	1.96815	4.14286	2.28228	3.35714	2.34052	13	1.84615	1.3445	2.30769	1.75046	3.53846	1.94145	3.76923	1.7867	2.46154	1.56074	1	F	none	undifferentiated		unclassified
715	festtag	celebrować	26	4.38462	2.13686	1.5	1.06771	1.34615	0.745241	1.38462	0.852147	1.42308	1.02657	12	4.08333	2.19331	1.5	1	1.58333	0.996205	1.33333	0.887625	1.25	0.866025	14	4.64286	2.13423	1.5	1.16024	1.14286	0.363137	1.42857	0.851631	1.57143	1.15787	1	H	H	H		unclassified
726	filmstar	celebryta	26	2.57692	1.8368	2.65385	1.64784	1.73077	1.31325	1.38462	0.803837	3.23077	1.5826	12	2.25	1.60255	2.25	1.21543	1.58333	0.996205	1.33333	0.651339	3.08333	1.37895	14	2.85714	2.0327	3	1.92154	1.85714	1.56191	1.42857	0.937614	3.35714	1.78054	1	D	none	undifferentiated		D
770	fracht	celnik	26	1.42308	0.808608	2.76923	2.14117	2.19231	1.91873	3.34615	2.07735	2.26923	1.90909	11	1.45455	0.687552	2.81818	2.18258	1.81818	1.83402	2.90909	1.97254	2.09091	1.81409	15	1.4	0.910259	2.73333	2.18654	2.46667	1.99523	3.66667	2.16025	2.4	2.02837	1	F	none	undifferentiated		unclassified
1852	preis	cena	26	1.80769	1.32723	3.38462	2.11805	2.88462	2.02636	2.57692	1.85845	2.84615	2.20349	12	1.75	1.54479	3.25	2.30119	2.91667	1.97523	2.66667	1.96946	3.08333	2.35327	14	1.85714	1.16732	3.5	2.02864	2.85714	2.14322	2.5	1.82925	2.64286	2.13423	1	A	none	undifferentiated		unclassified
2057	schätzen	cenić	26	4.34615	1.59856	1.30769	0.837579	1.42308	1.02657	1.65385	0.93562	1.30769	0.837579	15	4.6	1.76473	1.26667	0.798809	1.4	1.0556	1.46667	0.833809	1.13333	0.351866	11	4	1.34164	1.36364	0.924416	1.45455	1.03573	1.90909	1.04447	1.54545	1.21356		H	H	H		unclassified
2775	wert	cenny	26	4.30769	1.71509	1.19231	0.567044	1.30769	0.837579	2.30769	1.69161	1.19231	0.633671	12	4.33333	1.72328	1.16667	0.57735	1.33333	0.887625	2.33333	1.82574	1.25	0.866025	14	4.28571	1.77281	1.21429	0.578934	1.28571	0.82542	2.28571	1.63747	1.14286	0.363137	1	H	H	H		unclassified
1552	mittel	centralny	26	2.03846	1.37057	1.88462	1.60815	1.96154	1.82166	2.19231	1.95998	2.23077	1.96586	15	2.33333	1.63299	1.6	1.18322	1.66667	1.17514	1.93333	1.48645	1.86667	1.30201	11	1.63636	0.80904	2.27273	2.05382	2.36364	2.4606	2.54545	2.50454	2.72727	2.61116	1	D	none	undifferentiated		unclassified
739	flegel	cham	26	1.11538	0.431455	5.23077	1.68066	3.30769	1.82799	3.26923	1.88802	5	1.89737	14	1.14286	0.534522	5.14286	1.83375	3	1.79743	2.71429	1.68379	5.07143	1.8172	12	1.08333	0.288675	5.33333	1.557	3.66667	1.87487	3.91667	1.97523	4.91667	2.06522	1	A	none	blended	AD	unclassified
458	chaos	chaotyczny	26	1.92308	1.44009	3.84615	2.23951	2.34615	1.76505	3.11538	2.21498	2.65385	1.89615	11	2	1.18322	4.18182	2.27236	2.18182	1.25045	3.09091	2.07145	2.45455	1.69491	15	1.86667	1.64172	3.6	2.26148	2.46667	2.09989	3.13333	2.38647	2.8	2.07709	1	A	none	undifferentiated		unclassified
459	charakter	charakter	26	3.84615	1.84808	2.07692	1.26248	1.42308	0.643309	1.88462	1.45126	1.53846	1.10384	14	4.14286	1.9945	1.92857	1.14114	1.28571	0.468807	1.71429	1.20439	1.14286	0.534522	12	3.5	1.67874	2.25	1.42223	1.58333	0.792961	2.08333	1.72986	2	1.41421		H	none	H		unclassified
2808	wollen	chcieć	27	4.33333	1.7097	1.77778	1.18754	2.03704	1.45395	2.14815	1.53682	1.59259	1.04731	14	5	1.4676	2.07143	1.20667	2.07143	1.14114	2.57143	1.15787	1.57143	0.755929	13	3.61538	1.7097	1.46154	1.1266	2	1.77951	1.69231	1.79743	1.61538	1.3253		H	H	H		unclassified
945	habgier	chciwość	26	1.15385	0.464095	4.34615	1.6957	3.65385	2.22607	3.11538	1.86176	3.88462	1.88312	14	1	0	4.35714	1.7368	3.42857	2.24343	2.71429	1.85757	3.92857	2.05555	12	1.33333	0.651339	4.33333	1.72328	3.91667	2.2747	3.58333	1.83196	3.83333	1.74946	1	A	none	undifferentiated		unclassified
1514	mickrig	cherlawy	26	1.30769	0.970329	1.73077	0.91903	2.92308	1.59808	2.65385	1.71912	2.26923	1.51149	15	1.33333	1.04654	1.53333	0.915475	2.86667	1.88478	2.33333	1.87718	2.26667	1.86956	11	1.27273	0.904534	2	0.894427	3	1.18322	3.09091	1.446	2.27273	0.904534		S	none	undifferentiated		S
853	gekicher	chichot	26	4.73077	1.53773	1.92308	1.32433	1.53846	0.947872	2.11538	1.50537	1.84615	1.56697	13	4.92308	1.60528	1.61538	0.767948	1.46154	0.967418	1.92308	1.25576	1.38462	0.767948	13	4.53846	1.5064	2.23077	1.69085	1.61538	0.960769	2.30769	1.75046	2.30769	2.01596	1	H	H	H		unclassified
1141	kichern	chichotać	27	5.07407	1.95971	1.96296	1.65207	1.22222	0.57735	1.37037	0.83887	1.44444	1.08604	14	5.07143	2.01778	2.07143	1.8172	1.14286	0.534522	1.28571	0.82542	1.57143	1.39859	13	5.07692	1.97744	1.84615	1.51911	1.30769	0.630425	1.46154	0.877058	1.30769	0.630425		H	H	H		unclassified
2041	saufen	chlać	27	2.92593	2.40074	3.2963	2.16288	3.51852	2.20786	3.07407	2.21752	3.81481	2.28771	14	2.5	2.40992	3.64286	2.30742	3.85714	2.59755	3.64286	2.56026	4.5	2.06621	13	3.38462	2.39925	2.92308	2.01914	3.15385	1.72463	2.46154	1.6641	3.07692	2.36155		D	none	undifferentiated		unclassified
434	brot	chleb	26	5.07692	1.67148	1.38462	1.23538	1.69231	1.49048	1.5	1.10454	1.42308	1.50128	14	5.07143	1.8172	1.42857	1.34246	1.78571	1.62569	1.35714	1.08182	1.42857	1.60357	12	5.08333	1.56428	1.33333	1.1547	1.58333	1.37895	1.66667	1.1547	1.41667	1.44338	1	H	H	H		unclassified
452	bursche	chłopak	27	4.18519	2.18451	1.81481	1.66496	1.74074	1.45688	1.85185	1.53682	1.77778	1.5525	14	5.64286	1.27745	2.35714	2.06089	2.21429	1.76193	2.42857	1.82775	1.71429	1.68379	13	2.61538	1.85016	1.23077	0.83205	1.23077	0.83205	1.23077	0.83205	1.84615	1.46322	1	H	H	H		unclassified
1081	junge	chłopiec	26	3.69231	1.80597	1.61538	1.20256	1.92308	1.29377	1.5	0.860233	1.38462	0.852147	13	4.23077	1.5359	1.61538	0.960769	1.76923	1.42325	1.23077	0.438529	1.23077	0.438529	13	3.15385	1.95133	1.61538	1.44559	2.07692	1.18754	1.76923	1.09193	1.53846	1.1266	1	H	none	H		unclassified
1173	knabe	chłopięcy	26	3.38462	1.89899	1.61538	1.38786	2.15385	1.61722	1.57692	1.33186	1.53846	1.06699	15	3.46667	1.88478	1.73333	1.70992	2.06667	1.86956	1.8	1.65616	1.53333	0.99043	11	3.27273	2.00454	1.45455	0.8202	2.27273	1.27208	1.27273	0.64667	1.54545	1.21356	1	H	none	H		unclassified
2806	wolke	chmura	26	3.34615	1.99885	2.15385	1.9533	2.42308	2.13866	2.19231	2.11696	1.76923	1.77331	12	3.66667	1.87487	1.66667	0.887625	1.83333	1.40346	2	1.59545	1.33333	0.651339	14	3.07143	2.12908	2.57143	2.50275	2.92857	2.55597	2.35714	2.53004	2.14286	2.31574	1	H	none	undifferentiated		unclassified
2607	verflixt	cholerny	27	1.33333	0.679366	3.96296	1.7863	2.03704	1.55617	2.44444	1.82574	2.48148	1.90889	14	1.64286	0.841897	4.85714	1.56191	2.71429	1.85757	2.85714	1.91581	3.14286	1.83375	13	1	0	3	1.52753	1.30769	0.630425	2	1.68325	1.76923	1.7867		A	none	A		A
956	hamster	chomik	26	3.88462	2.14153	1.26923	0.724303	1.38462	0.982931	1.46154	0.904689	1.92308	1.44009	12	3.91667	2.10878	1.41667	0.996205	1.25	0.866025	1.83333	1.19342	1.58333	1.1645	14	3.85714	2.24832	1.14286	0.363137	1.5	1.09193	1.14286	0.363137	2.21429	1.62569	1	H	none	H		unclassified
676	fahne	chorągiew	27	2.88889	1.98714	1.22222	0.697982	1.66667	1.1094	1.59259	1.08342	1.18519	0.557262	14	2.28571	1.9779	1.21429	0.801784	1.64286	1.15073	1.5	0.94054	1.14286	0.534522	13	3.53846	1.85362	1.23077	0.599145	1.69231	1.1094	1.69231	1.25064	1.23077	0.599145	1	H	none	H		N
1222	krank	chory	26	1.19231	0.491466	2.84615	1.84808	3.38462	1.52517	3.03846	1.66086	2.26923	1.73338	12	1.16667	0.389249	2.41667	1.67649	3.41667	1.31137	2.91667	1.1645	1.66667	0.778499	14	1.21429	0.578934	3.21429	1.96815	3.35714	1.7368	3.14286	2.0327	2.78571	2.15473		S	none	undifferentiated		unclassified
2135	schützen	chronić	27	5	1.56893	1.59259	1.11835	1.48148	0.935224	3.18519	1.88184	1.37037	1.21365	14	5.35714	1.39268	1.78571	1.42389	1.57143	1.15787	2.85714	1.9945	1.5	1.60528	13	4.61538	1.7097	1.38462	0.650444	1.38462	0.650444	3.53846	1.76141	1.23077	0.599145		H	H	H		unclassified
462	christus	Chrystus	26	3.69231	2.2763	1.34615	0.845804	1.96154	1.14824	1.73077	1.45761	1.34615	1.29437	11	4.90909	2.16585	1.36364	0.924416	2.18182	1.32802	2.27273	1.95402	1.54545	1.80907	15	2.8	1.97122	1.33333	0.816497	1.8	1.01419	1.33333	0.816497	1.2	0.774597	1	H	none	H		unclassified
1086	käfer	chrząszcz	26	2.46154	1.63048	2.07692	1.62291	1.34615	0.79711	2.53846	1.81617	2.92308	1.97834	13	2.07692	1.18754	1.84615	1.51911	1.46154	0.967418	2.76923	1.83275	3.07692	2.10006	13	2.84615	1.95133	2.30769	1.75046	1.23077	0.599145	2.30769	1.84321	2.76923	1.92154	1	D	none	undifferentiated		unclassified
2397	taufe	chrzcić	26	3.53846	2.26682	1.73077	1.31325	1.53846	0.859338	1.73077	1.25085	2.03846	1.6366	11	4.81818	2.0405	1.18182	0.40452	1.45455	0.8202	1.45455	0.8202	1.81818	1.83402	15	2.6	1.99284	2.13333	1.59762	1.6	0.910259	1.93333	1.48645	2.2	1.52128	1	H	none	H		unclassified
29	abmagern	chudnąć	27	3.22222	2.04438	2.03704	1.45395	2.55556	1.76141	2.44444	1.64862	1.88889	1.62512	14	3.35714	1.98483	2.5	1.55662	3	1.6641	2.92857	1.77436	2.28571	1.77281	13	3.07692	2.17798	1.53846	1.19829	2.07692	1.801	1.92308	1.38212	1.46154	1.39137		H	none	undifferentiated		unclassified
1426	mager	chudy	26	3.15385	1.80427	1.92308	1.38342	2.26923	1.34336	2	1.38564	1.76923	1.06987	11	3.63636	2.01359	2.27273	1.67874	2.72727	1.42063	2.27273	1.48936	1.72727	0.786245	15	2.8	1.61245	1.66667	1.1127	1.93333	1.2228	1.8	1.32017	1.8	1.26491		H	none	undifferentiated		unclassified
1377	loben	chwalić	27	4.48148	2.11897	1.88889	1.5525	1.25926	0.525693	1.62963	0.966681	1.59259	1.36605	14	4.64286	2.30742	1.85714	1.74784	1.14286	0.363137	1.57143	0.937614	1.71429	1.72888	13	4.30769	1.97419	1.92308	1.38212	1.38462	0.650444	1.69231	1.03155	1.46154	0.877058		H	H	H		unclassified
1844	prahlen	chwalipięta	26	1.26923	0.724303	4.26923	1.80128	2.23077	1.92474	1.88462	1.68112	3.23077	1.83973	11	1	0	4.45455	1.69491	2.27273	1.79393	1.45455	0.934199	2.90909	1.3751	15	1.46667	0.915475	4.13333	1.9223	2.2	2.07709	2.2	2.04241	3.46667	2.13363		A	none	undifferentiated		A
2555	unkraut	chwast	26	1.15385	0.612686	2.84615	1.73649	1.88462	1.65715	1.73077	1.6866	3	1.85472	12	1.33333	0.887625	2.16667	1.4668	1.16667	0.57735	1.08333	0.288675	2.25	1.28806	14	1	0	3.42857	1.78516	2.5	2.02864	2.28571	2.16364	3.64286	2.06089	1	D	none	undifferentiated		unclassified
1263	labil	chwiejny	26	1.53846	1.06699	2.57692	1.44701	2.46154	1.63048	3.34615	1.57334	2.46154	1.74885	15	1.26667	0.593617	2.6	1.59463	2.86667	1.64172	3.66667	1.49603	2.13333	1.35576	11	1.90909	1.446	2.54545	1.29334	1.90909	1.51357	2.90909	1.6404	2.90909	2.16585		F	none	undifferentiated		F
924	greifen	chwytać	26	3.07692	2.05763	1.5	1.27279	1.34615	0.745241	1.84615	1.66595	1.42308	0.986836	12	4	2.08893	1.58333	1.50504	1.33333	0.778499	1.91667	1.88092	1.25	0.621582	14	2.28571	1.72888	1.42857	1.08941	1.35714	0.744946	1.78571	1.52812	1.57143	1.2225		H	none	undifferentiated		unclassified
1301	leib	ciało	26	3.88462	2.14153	1.5	1.14018	1.80769	1.26552	1.80769	1.3862	1.65385	1.05612	12	4.08333	2.06522	1.41667	1.1645	1.91667	1.08362	1.83333	1.4668	1.5	0.6742	14	3.71429	2.26779	1.57143	1.15787	1.71429	1.43734	1.78571	1.3688	1.78571	1.3114	1	H	none	H		unclassified
2059	schauer	ciarki	26	2.76923	2.21464	1.96154	1.68477	2.15385	2.0138	4.15385	2.07253	2.26923	1.86671	11	2.45455	2.16165	1.63636	1.02691	1.90909	1.30035	4.27273	2.10195	2.27273	1.55505	15	3	2.29907	2.2	2.04241	2.33333	2.43975	4.06667	2.1202	2.26667	2.1202	1	F	none	undifferentiated		F
1131	keks	ciastko	26	5.69231	1.40767	1.38462	0.941357	1.53846	1.1395	1.42308	1.23849	1.30769	1.19228	11	5.72727	1.10371	1.81818	1.32802	1.81818	1.53741	1.81818	1.83402	1.54545	1.80907	15	5.66667	1.63299	1.06667	0.258199	1.33333	0.723747	1.13333	0.351866	1.13333	0.351866	1	H	H	H		H
1242	kuchen	ciasto	26	5.23077	1.79572	1.46154	1.33359	1.57692	1.4191	1.5	1.2083	1.46154	1.06699	12	5.41667	1.92865	1.83333	1.85047	1.75	1.86474	1.83333	1.52753	1.58333	1.08362	14	5.07143	1.73046	1.14286	0.534522	1.42857	0.937614	1.21429	0.801784	1.35714	1.08182	1	H	H	H		unclassified
2861	ziehen	ciągnąć	26	2.53846	2.04413	2	1.52315	1.65385	1.16421	1.84615	1.37673	2.15385	1.59229	12	2.58333	1.92865	2.41667	1.72986	1.83333	1.33712	2.25	1.60255	2.58333	1.83196	14	2.5	2.21012	1.64286	1.27745	1.5	1.01905	1.5	1.09193	1.78571	1.3114		H	none	undifferentiated		unclassified
2316	still	cichy	26	2.53846	1.85969	1.5	0.761577	2.92308	1.93748	2.26923	1.5889	1.30769	0.679366	15	2.33333	1.91485	1.53333	0.63994	3.13333	2.13363	2.13333	1.64172	1.26667	0.593617	11	2.81818	1.83402	1.45455	0.934199	2.63636	1.68954	2.45455	1.57249	1.36364	0.80904		S	none	undifferentiated		S
1672	neugier	ciekawy	26	4.76923	1.47804	1.30769	0.837579	1.5	1.39284	1.80769	1.57529	1.26923	1.18516	12	4.5	1.62369	1.41667	0.900337	1.41667	1.1645	1.66667	1.61433	1.08333	0.288675	14	5	1.35873	1.21429	0.801784	1.57143	1.60357	1.92857	1.59153	1.42857	1.60357	1	H	H	H		unclassified
2055	schattig	cienisty	26	1.84615	1.31734	1.30769	0.735893	1.80769	1.29674	1.65385	0.845804	1.26923	0.603834	12	1.91667	1.31137	1.41667	0.900337	1.75	1.05529	1.58333	0.792961	1.41667	0.792961	14	1.78571	1.3688	1.21429	0.578934	1.85714	1.51186	1.71429	0.913874	1.14286	0.363137		H	none	undifferentiated		N
2054	schatten	cień	26	1.84615	1.43366	1.15385	0.612686	1.84615	1.40548	2.80769	1.60048	1.30769	0.788377	12	1.41667	0.514929	1	0	1.91667	1.78164	2.66667	1.61433	1.08333	0.288675	14	2.21429	1.84718	1.28571	0.82542	1.78571	1.0509	2.92857	1.63915	1.5	1.01905	1	F	none	undifferentiated		F
2733	warm	ciepły	26	5.5	1.42127	1.61538	1.20256	1.42308	0.902134	1.65385	1.67194	1.11538	0.325813	12	6	1.3484	1.58333	1.1645	1.5	1.16775	1.66667	1.77525	1.08333	0.288675	14	5.07143	1.38477	1.64286	1.27745	1.35714	0.633324	1.64286	1.64584	1.14286	0.363137		H	H	H		H
638	erleiden	cierpieć	26	1.19231	0.567044	4.11538	2.12277	5.69231	1.54322	5.15385	1.73649	3.23077	2.14117	15	1.13333	0.516398	4.33333	2.19306	6	1.46385	5.2	1.78085	3	2.17124	11	1.27273	0.64667	3.81818	2.08893	5.27273	1.61808	5.09091	1.7581	3.54545	2.16165		S	none	undifferentiated		unclassified
1305	leid	cierpienie	27	1.22222	0.697982	3.81481	2.2367	5.96296	1.42725	5.81481	1.49453	3.07407	2.33577	14	1	0	4.21429	2.63639	6.71429	0.61125	6.28571	1.32599	2.92857	2.58589	13	1.46154	0.967418	3.38462	1.7097	5.15385	1.62512	5.30769	1.54837	3.23077	2.12736	1	S	none	blended	SF	unclassified
830	geduld	cierpliwy	26	4.34615	1.99885	1.88462	1.58308	1.69231	1.19228	1.65385	1.35476	1.30769	0.617688	12	4.91667	1.83196	2.25	2.13733	1.91667	1.31137	1.83333	1.74946	1.25	0.621582	14	3.85714	2.0702	1.57143	0.851631	1.5	1.09193	1.5	0.94054	1.35714	0.633324	1	H	H	H		unclassified
1275	last	ciężar	26	1.57692	1.33186	3.30769	2.09321	3.03846	2.00959	3.26923	2.21915	2.11538	1.50537	12	1.25	0.621582	3.25	2.17945	2.75	2.13733	3.83333	2.55248	2.5	1.88294	14	1.85714	1.70326	3.35714	2.09788	3.28571	1.93862	2.78571	1.84718	1.78571	1.0509	1	A	none	undifferentiated		unclassified
1276	laster	ciężarówka	26	2.03846	1.61197	2	1.67332	1.65385	1.57334	2.46154	2.2491	1.61538	1.20256	11	1.81818	1.4013	2.63636	2.01359	2.27273	2.149	3.45455	2.87623	2.09091	1.51357	15	2.2	1.78085	1.53333	1.24595	1.2	0.774597	1.73333	1.33452	1.26667	0.798809	1	F	none	undifferentiated		unclassified
2090	schlag	cios	26	1.53846	1.1395	3.84615	1.80427	3.92308	2.18949	4.57692	1.79272	2.38462	1.67516	14	1.07143	0.267261	3.64286	1.59842	4.07143	2.12908	4.35714	1.78054	2	1.1767	12	2.08333	1.50504	4.08333	2.06522	3.75	2.34036	4.83333	1.85047	2.83333	2.08167	1	F	none	blended	FAS	unclassified
2381	tante	ciotka	26	2.88462	1.86176	2.07692	1.62291	1.96154	1.61197	1.73077	1.15092	1.88462	1.60815	15	2.6	1.95667	2.4	1.88225	2.13333	1.80739	1.93333	1.09978	2.26667	1.94447	11	3.27273	1.73729	1.63636	1.12006	1.72727	1.3484	1.45455	1.21356	1.36364	0.80904	1	H	none	undifferentiated		unclassified
529	druck	ciśnienie	27	1.66667	1.38675	2.25926	1.53404	1.96296	1.55617	2.74074	1.87273	1.96296	1.62863	14	1.71429	1.13873	1.92857	1.07161	1.42857	0.755929	2.14286	1.40642	1.71429	1.26665	13	1.61538	1.66024	2.61538	1.89466	2.53846	1.98391	3.38462	2.14237	2.23077	1.96443	1	F	none	undifferentiated		unclassified
2874	zoll	cło	26	1.53846	0.989172	2.30769	1.28901	1.46154	0.706018	1.84615	1.31734	1.65385	1.26309	12	1.75	1.21543	2.16667	1.11464	1.66667	0.778499	1.66667	0.984732	1.58333	1.44338	14	1.35714	0.744946	2.42857	1.45255	1.28571	0.61125	2	1.56893	1.71429	1.13873	1	A	none	undifferentiated		unclassified
789	friedhof	cmentarz	27	1.22222	0.800641	2.18519	1.64169	4.51852	2.19037	3.77778	2.3094	1.77778	1.60128	14	1.14286	0.363137	2.57143	1.55486	5.35714	2.02322	5.14286	1.95555	2.42857	2.02729	13	1.30769	1.1094	1.76923	1.69085	3.61538	2.06311	2.30769	1.70219	1.07692	0.27735	1	S	none	blended	SF	S
2504	tugend	cnota	26	4.15385	1.8263	1.73077	1.51149	1.76923	1.2746	2.07692	1.67148	1.46154	1.10384	14	3.35714	1.86495	1.71429	1.32599	1.64286	1.21574	2.14286	1.87523	1.64286	1.39268	12	5.08333	1.31137	1.75	1.76455	1.91667	1.37895	2	1.4771	1.25	0.621582	1	H	H	H		unclassified
84	alltag	codzienny	26	2.69231	1.73826	1.69231	1.12318	1.84615	1.37673	1.46154	0.811456	1.61538	1.23538	12	2.91667	2.02073	1.41667	0.900337	1.41667	1.1645	1.41667	0.996205	1.08333	0.288675	14	2.5	1.5064	1.92857	1.26881	2.21429	1.47693	1.5	0.650444	2.07143	1.54244	1	H	none	undifferentiated		unclassified
2431	tochter	córka	26	4.53846	1.92314	1.38462	0.752432	1.46154	0.859338	1.96154	1.48272	1.11538	0.431455	12	4.58333	1.88092	1.5	0.904534	1.66667	1.07309	1.58333	1.24011	1.16667	0.57735	14	4.5	2.02864	1.28571	0.61125	1.28571	0.61125	2.28571	1.63747	1.07143	0.267261	1	H	H	H		unclassified
2319	stinken	cuchnący	27	1.2963	0.868899	3.18519	2.27084	2.62963	1.86358	2.44444	1.73944	5.44444	1.88788	14	1.07143	0.267261	3.92857	2.52569	2.5	1.99036	2.71429	1.9779	6.42857	0.937614	13	1.53846	1.19829	2.38462	1.7097	2.76923	1.7867	2.15385	1.46322	4.38462	2.10311		D	D	D		D
2816	wunder	cud	26	5.65385	1.35476	1.38462	1.29852	1.38462	1.02282	1.88462	1.58308	1.26923	0.827415	12	5.83333	1.2673	1.5	1.73205	1.33333	1.1547	1.5	1.24316	1.25	0.866025	14	5.5	1.45444	1.28571	0.82542	1.42857	0.937614	2.21429	1.80506	1.28571	0.82542	1	H	H	H		H
2640	verrat	cudzołóstwo	27	2	1.6641	4.07407	1.85899	4.07407	2.25194	3.66667	2.23607	3.7037	2.16288	14	2.14286	1.95555	4.78571	1.57766	5.42857	1.65084	4.57143	2.02729	4	2.2188	13	1.84615	1.3445	3.30769	1.88788	2.61538	1.89466	2.69231	2.09701	3.38462	2.14237	1	none	none	undifferentiated		unclassified
416	bonbon	cukierek	26	4.96154	1.53573	1.23077	0.710363	1.30769	0.788377	1.92308	1.76461	1.23077	0.710363	13	5.23077	1.42325	1.38462	0.960769	1.23077	0.83205	2.23077	2.04751	1.15385	0.5547	13	4.69231	1.6525	1.07692	0.27735	1.38462	0.767948	1.61538	1.44559	1.30769	0.85485	1	H	H	H		unclassified
2095	schlau	cwany	26	2.19231	1.54969	3.84615	1.56697	2.42308	1.39063	2.96154	1.6366	3.38462	2.13686	14	2.35714	1.90575	3.85714	1.65748	2.21429	1.3688	2.92857	1.73046	3.28571	2.30146	12	2	1.04447	3.83333	1.52753	2.66667	1.43548	3	1.59545	3.5	2.0226		A	none	undifferentiated		unclassified
2866	zigarre	cygaro	27	2.18519	1.66496	2.07407	1.66239	1.51852	1.12217	1.55556	1.2195	2.66667	2.32048	14	2.07143	2.01778	1.71429	1.63747	1.14286	0.363137	1.28571	0.82542	2.71429	2.58482	13	2.30769	1.25064	2.46154	1.6641	1.92308	1.49786	1.84615	1.51911	2.61538	2.10311	1	D	none	undifferentiated		unclassified
2901	zylinder	cylinder	26	3.30769	1.76112	1.38462	1.0612	1.23077	0.514408	1.19231	0.800961	1.65385	1.46812	13	3	1.91485	1.46154	1.39137	1.23077	0.599145	1.07692	0.27735	1.69231	1.6525	13	3.61538	1.60927	1.30769	0.630425	1.23077	0.438529	1.30769	1.1094	1.61538	1.3253	1	H	none	H		unclassified
2902	zynismus	cyniczny	26	1.61538	1.0612	4.38462	1.79057	3.57692	1.94264	3.11538	2.21498	4.07692	2.26138	13	1.76923	1.16575	4.92308	1.32045	3.76923	2.0064	3.84615	2.37508	4.07692	2.62874	13	1.46154	0.967418	3.84615	2.0755	3.38462	1.93815	2.38462	1.85016	4.07692	1.93484	1	A	none	undifferentiated		unclassified
2869	zirkus	cyrkowy	26	2.92308	1.91673	2.57692	2.11987	1.92308	1.76461	2.38462	1.96116	2.26923	1.95054	12	3.5	2.11058	2.58333	2.23437	1.75	1.71226	2.66667	2.34844	2.58333	2.23437	14	2.42857	1.65084	2.57143	2.1018	2.07143	1.85904	2.14286	1.61041	2	1.7097	1	H	none	undifferentiated		unclassified
2870	zitat	cytat	26	3.15385	2.16688	1.5	0.948683	1.73077	1.48479	1.53846	1.1395	1.19231	0.633671	12	3.08333	2.10878	1.33333	0.887625	1.41667	0.900337	1.66667	1.37069	1.41667	0.900337	14	3.21429	2.29309	1.64286	1.00821	2	1.83973	1.42857	0.937614	1	0	1	H	none	H		unclassified
2871	zitrone	cytryna	27	3.81481	1.77671	1.40741	0.797074	1.33333	0.960769	1.2963	0.724028	1.33333	0.5547	14	4.78571	1.47693	1.42857	0.646206	1.35714	0.841897	1.35714	0.633324	1.5	0.650444	13	2.76923	1.48064	1.38462	0.960769	1.30769	1.1094	1.23077	0.83205	1.15385	0.375534	1	H	H	H		unclassified
1111	kappe	czapka	26	2.76923	1.63236	2.26923	2.03091	1.38462	0.982931	1.53846	1.20767	1.61538	1.52517	13	2.92308	1.801	2.61538	2.25605	1.38462	1.1209	1.76923	1.5359	1.61538	1.66024	13	2.61538	1.50214	1.92308	1.801	1.38462	0.869718	1.30769	0.751068	1.61538	1.44559	1	H	none	undifferentiated		unclassified
1947	reiher	czapla	27	3	1.81871	1.44444	0.891556	1.25926	0.712125	1.37037	0.741524	1.2963	0.6688	14	2.85714	1.51186	1.42857	0.851631	1.28571	0.61125	1.57143	0.937614	1.5	0.85485	13	3.15385	2.1543	1.46154	0.967418	1.23077	0.83205	1.15385	0.375534	1.07692	0.27735	1	H	none	H		N
2837	zauber	czar	27	5	1.68705	1.37037	0.741524	1.40741	0.888355	1.85185	1.23113	1.2963	0.823446	14	5.71429	0.99449	1.57143	0.937614	1.78571	1.12171	2.14286	0.949262	1.5	1.09193	13	4.23077	1.96443	1.15385	0.375534	1	0	1.53846	1.45002	1.07692	0.27735	1	H	H	H		unclassified
1559	mohr	czarnuch	27	1.88889	1.78311	3.77778	2.40725	2.7037	1.89767	2.44444	1.94804	2.48148	2.11897	14	1.92857	2.01778	3.71429	2.33464	3	2.0381	2.28571	2.01642	2.35714	1.7368	13	1.84615	1.57301	3.84615	2.57702	2.38462	1.75777	2.61538	1.93815	2.61538	2.53438	1	A	none	undifferentiated		unclassified
2140	schwarz	czarny	26	2	1.69706	1.88462	1.72805	2.92308	2.13397	2.5	2.08327	1.88462	1.55761	12	1.83333	1.58592	1.83333	1.80067	3	2.17423	2.16667	1.85047	1.66667	1.77525	14	2.14286	1.83375	1.92857	1.73046	2.85714	2.17882	2.78571	2.29309	2.07143	1.38477		S	none	undifferentiated		unclassified
2839	zauberer	czarodziej	27	4.33333	2.05688	1.14815	0.601518	1.2963	0.6688	1.85185	1.23113	1.25926	0.813	14	4.07143	2.1649	1.28571	0.82542	1.21429	0.425815	1.78571	1.0509	1.14286	0.363137	13	4.61538	1.98068	1	0	1.38462	0.869718	1.92308	1.44115	1.38462	1.1209	1	H	H	H		unclassified
2838	zauberei	czarodziejski	26	4.61538	1.38786	1.23077	0.710363	1.42308	0.808608	1.92308	1.23038	1.15385	0.784465	12	4.41667	1.1645	1.25	0.621582	1.41667	0.668558	2	1.04447	1	0	14	4.78571	1.57766	1.21429	0.801784	1.42857	0.937614	1.85714	1.40642	1.28571	1.06904	1	H	H	H		unclassified
2840	zaubern	czarować	26	3.46154	2.13973	1.65385	1.01754	1.5	1.06771	1.96154	1.61197	1.73077	1.48479	12	4.41667	2.02073	1.5	0.904534	1.41667	0.792961	1.83333	1.33712	1.41667	0.900337	14	2.64286	1.94569	1.78571	1.12171	1.57143	1.28388	2.07143	1.85904	2	1.83973		H	none	H		unclassified
1007	hexe	czarownica	26	2.42308	2.17574	2.03846	1.37057	2.30769	1.69161	3.07692	1.95802	2.76923	1.94541	15	2	1.88982	1.8	1.08233	2.13333	1.55226	3.26667	1.86956	2.8	1.89737	11	3	2.48998	2.36364	1.68954	2.54545	1.91644	2.81818	2.13627	2.72727	2.10195	1	F	none	undifferentiated		unclassified
1280	lauer	czaty	26	2.11538	1.60815	2.03846	1.77721	1.69231	1.49048	2.76923	2.12241	1.5	1.02956	12	2	1.95402	2.41667	2.19331	1.83333	1.52753	3.08333	2.19331	1.66667	1.1547	14	2.21429	1.3114	1.71429	1.32599	1.57143	1.50457	2.5	2.10311	1.35714	0.928783	1	F	none	undifferentiated		unclassified
2736	warterei	czekać	27	1.85185	1.43322	3.88889	1.73944	2.81481	1.77671	2.77778	2.17208	2.03704	1.67519	14	2.14286	1.51186	4.35714	1.7368	3.78571	1.67233	3.71429	2.12779	2.57143	1.94992	13	1.53846	1.33012	3.38462	1.66024	1.76923	1.23517	1.76923	1.7867	1.46154	1.1266	1	A	none	undifferentiated		A
1896	rachen	czeluść	26	1.76923	1.45073	1.92308	1.38342	3.07692	1.89574	4.07692	1.99846	2.26923	1.66271	14	1.64286	1.27745	1.57143	0.937614	3.35714	1.98483	4.28571	1.9779	1.92857	1.20667	12	1.91667	1.67649	2.33333	1.72328	2.75	1.81534	3.83333	2.08167	2.66667	2.05971	1	F	none	undifferentiated		F
966	haube	czepek	27	2.44444	1.62512	1.74074	1.3754	1.2963	0.724028	1.55556	1.1209	2.37037	2.09667	14	2.14286	1.46009	2.21429	1.71772	1.5	0.94054	1.64286	1.15073	3	2.68901	13	2.76923	1.7867	1.23077	0.599145	1.07692	0.27735	1.46154	1.1266	1.69231	0.85485	1	H	none	undifferentiated		unclassified
1438	maibaum	czeremcha	27	2.48148	1.80534	1.37037	0.883531	1.77778	1.5525	1.74074	1.50876	1.77778	1.45002	14	2.35714	1.54955	1.28571	0.82542	1.57143	1.15787	1.64286	1.49908	1.71429	1.26665	13	2.61538	2.10311	1.46154	0.967418	2	1.91485	1.84615	1.57301	1.84615	1.67562	1	H	none	undifferentiated		unclassified
2401	teil	część	26	1.80769	1.09615	1.57692	1.13747	1.61538	1.0612	1.65385	1.26309	1.23077	0.710363	12	1.83333	1.19342	1.58333	1.1645	1.58333	1.1645	1.41667	0.996205	1.25	0.866025	14	1.78571	1.0509	1.57143	1.15787	1.64286	1.00821	1.85714	1.46009	1.21429	0.578934	1	H	none	undifferentiated		N
1548	mitglied	członek	26	3.07692	1.83135	1.42308	0.757526	1.5	0.761577	1.73077	1.07917	2.30769	1.64364	14	2.78571	2.04483	1.35714	0.744946	1.35714	0.744946	1.5	0.85485	2.42857	1.78516	12	3.41667	1.56428	1.5	0.797724	1.66667	0.778499	2	1.2792	2.16667	1.52753	1	H	none	undifferentiated		unclassified
1502	mensch	człowiek	26	4.61538	1.79057	3.53846	2.1951	3.42308	2.13866	3.38462	2.17397	2.96154	2.30618	13	4.84615	1.57301	3.30769	2.28709	3.23077	2.12736	3.38462	2.18092	2.46154	2.02548	13	4.38462	2.02231	3.76923	2.16617	3.61538	2.2188	3.38462	2.25605	3.46154	2.53691	1	H	none	undifferentiated		unclassified
1740	panzer	czołg	27	2.2963	1.6128	2.74074	1.99215	2.85185	1.83353	3.77778	1.94804	2.14815	1.85439	14	1.78571	1.47693	2.85714	2.14322	2.85714	2.0702	4	1.7097	2.21429	1.96815	13	2.84615	1.62512	2.61538	1.89466	2.84615	1.62512	3.53846	2.22169	2.07692	1.801	1	F	none	undifferentiated		unclassified
2835	zäpfchen	czopek	26	1.53846	1.33359	2.53846	1.88108	2.11538	1.81828	3.34615	2.33139	4.42308	2.10092	12	1.08333	0.288675	3.33333	1.96946	2.58333	2.10878	4.5	2.27636	5.5	1.97714	14	1.92857	1.73046	1.85714	1.56191	1.71429	1.48989	2.35714	1.94569	3.5	1.7867	1	D	none	undifferentiated		D
798	fühlen	czuć	27	4.37037	1.96406	2.11111	1.62512	2.44444	1.71718	2.48148	1.86816	1.59259	1.11835	14	4.57143	1.91007	1.85714	1.29241	2.85714	1.87523	3.14286	2.14322	1.64286	1.33631	13	4.15385	2.0755	2.38462	1.93815	2	1.47196	1.76923	1.23517	1.53846	0.877058		H	none	H		unclassified
2709	wachsam	czujny	26	2.65385	1.5477	1.88462	1.33647	1.84615	1.25514	3.26923	1.95054	1.38462	0.803837	13	2.38462	1.50214	2	1.1547	2.07692	1.25576	4.07692	1.70595	1.53846	0.967418	13	2.92308	1.60528	1.76923	1.5359	1.61538	1.26085	2.46154	1.89804	1.23077	0.599145		F	none	undifferentiated		F
279	bedrohen	czyhać	26	1.34615	0.689481	2.15385	1.22286	1.80769	1.09615	4.07692	1.76461	1.80769	1.09615	12	1.66667	0.887625	2.16667	1.11464	1.91667	0.996205	4.25	1.48477	1.91667	1.31137	14	1.07143	0.267261	2.14286	1.35062	1.71429	1.20439	3.92857	2.01778	1.71429	0.913874		F	F	F		F
2390	tat	czyn	27	3.37037	2.07824	1.7037	1.10296	1.44444	0.640513	1.85185	1.06351	1.33333	0.960769	14	3.28571	1.89852	1.57143	0.851631	1.35714	0.633324	1.64286	0.928783	1	0	13	3.46154	2.3315	1.84615	1.3445	1.53846	0.660225	2.07692	1.18754	1.69231	1.31559		H	none	H		unclassified
74	aktion	czynność	26	2.92308	1.76461	1.69231	1.22537	1.42308	0.808608	1.65385	1.09334	1.42308	1.10175	14	2.85714	1.9945	1.42857	1.15787	1.07143	0.267261	1.21429	0.578934	1	0	12	3	1.53741	2	1.2792	1.83333	1.02986	2.16667	1.33712	1.91667	1.50504	1	H	none	H		unclassified
1520	mietzins	czynsz	27	1.25926	0.712125	2.85185	1.76948	3.14815	1.85439	3	2	2.66667	1.94145	14	1.5	0.94054	3.14286	1.87523	3.57143	1.86936	3.07143	2.20015	2.35714	1.59842	13	1	0	2.53846	1.6641	2.69231	1.79743	2.92308	1.84669	3	2.27303	1	S	none	undifferentiated		unclassified
2039	sauber	czysty	26	5.42308	1.62906	1.26923	0.77757	1.26923	0.603834	1.15385	0.543493	1	0	15	5.33333	1.75933	1.46667	0.99043	1.33333	0.617213	1.26667	0.703732	1	0	11	5.54545	1.50756	1	0	1.18182	0.603023	1	0	1	0		H	H	H		H
1886	putzen	czyścić	26	2.96154	2.10677	2.46154	1.63048	1.61538	1.32897	1.5	1.02956	2.53846	1.74885	11	3.18182	2.18258	2.54545	1.50756	1.63636	1.02691	1.45455	0.934199	2.72727	1.67874	15	2.8	2.11119	2.4	1.76473	1.6	1.54919	1.53333	1.12546	2.4	1.84391		H	none	undifferentiated		unclassified
1330	leser	czytać	27	5.03704	1.99	1.33333	0.733799	1.37037	0.92604	1.11111	0.57735	1.11111	0.423659	14	5.28571	1.9779	1.07143	0.267261	1.5	1.16024	1.21429	0.801784	1	0	13	4.76923	2.04751	1.61538	0.960769	1.23077	0.599145	1	0	1.23077	0.599145	1	H	H	H		unclassified
1329	lesebuch	czytanka	26	3.42308	2.043	1.57692	1.33186	1.53846	1.33359	1.34615	1.19808	1.34615	1.23101	11	3.54545	2.38175	1.18182	0.40452	1.18182	0.40452	1.09091	0.301511	1	0	15	3.33333	1.83874	1.86667	1.68466	1.8	1.69874	1.53333	1.55226	1.6	1.59463	1	H	none	H		unclassified
1331	lesesaal	czytelnia	27	3.40741	1.52566	1.74074	1.31829	1.59259	1.2788	1.40741	1.11835	1.2963	0.724028	14	4.14286	1.29241	2.07143	1.59153	1.57143	1.39859	1.57143	1.34246	1.28571	0.61125	13	2.61538	1.38675	1.38462	0.869718	1.61538	1.19293	1.23077	0.83205	1.30769	0.85485	1	H	H	H		unclassified
2516	üben	ćwiczyć	27	4.59259	2.0987	1.96296	1.15962	1.44444	0.697982	1.62963	1.14852	1.85185	1.76948	14	4.21429	2.39161	1.64286	1.00821	1.35714	0.633324	1.71429	1.32599	2.14286	2.10703	13	5	1.73205	2.30769	1.25064	1.53846	0.77625	1.53846	0.967418	1.53846	1.33012		H	H	H		unclassified
2761	weite	dal	27	2.74074	1.74516	1.7037	1.1373	2.07407	1.4122	2.03704	1.42725	1.51852	1.08735	14	3.71429	1.43734	1.71429	0.913874	2.64286	1.54955	2.42857	1.50457	1.78571	1.25137	13	1.69231	1.4367	1.69231	1.37747	1.46154	0.967418	1.61538	1.26085	1.23077	0.83205	1	H	none	undifferentiated		unclassified
2760	weit	daleki	26	2.46154	1.72582	2.69231	1.95488	3.84615	1.8263	2.42308	1.17211	1.46154	1.02882	14	2.5	1.95133	2.57143	2.1018	4	1.92154	2.07143	0.916875	1.14286	0.534522	12	2.41667	1.50504	2.83333	1.85047	3.66667	1.77525	2.83333	1.33712	1.83333	1.33712		S	none	undifferentiated		S
465	dame	dama	26	4.42308	1.8368	1.57692	1.20576	1.65385	1.12933	1.69231	1.12318	1.73077	1.56353	15	4.4	1.95667	1.6	0.985611	1.4	0.507093	1.46667	0.743223	1.66667	1.58865	11	4.45455	1.75292	1.54545	1.50756	2	1.61245	2	1.48324	1.81818	1.60114	1	H	H	H		unclassified
2534	umsonst	daremny	26	1.5	1.10454	4	1.83303	4.07692	1.80938	2.19231	1.67378	1.92308	1.64738	12	1.5	1.24316	4	1.80907	3.83333	1.85047	1.66667	1.1547	1.33333	0.887625	14	1.5	1.01905	4	1.92154	4.28571	1.81568	2.64286	1.94569	2.42857	1.98898		S	none	blended	SA	unclassified
473	datum	data	26	2.26923	1.90909	1.65385	1.35476	1.76923	1.45073	2.5	2.00499	1.5	1.24097	12	2.41667	1.97523	1.91667	1.62135	1.83333	1.85047	2.33333	1.87487	1.33333	0.887625	14	2.14286	1.91581	1.42857	1.08941	1.71429	1.06904	2.64286	2.16997	1.64286	1.49908	1	F	none	undifferentiated		unclassified
2246	spende	datek	27	3.14815	1.85439	2.18519	1.46857	2.11111	1.1209	1.59259	1.18514	2.11111	1.47631	14	3.21429	1.3688	2.64286	1.64584	2.85714	0.949262	2.07143	1.49174	2.42857	1.45255	13	3.07692	2.326	1.69231	1.1094	1.30769	0.630425	1.07692	0.27735	1.76923	1.48064	1	H	none	undifferentiated		unclassified
1546	mitgeben	dawać	27	5.62963	1.54791	1.55556	1.05003	1.44444	0.891556	1.77778	1.2195	1.18519	0.622466	14	6	1.03775	1.57143	1.28388	1.35714	0.841897	1.57143	1.15787	1.21429	0.801784	13	5.23077	1.92154	1.53846	0.77625	1.53846	0.967418	2	1.29099	1.15385	0.375534		H	H	H		H
518	dosis	dawka	27	2.37037	1.77911	2.11111	1.39596	2.03704	1.34397	2.33333	1.61722	2.25926	1.91337	14	3.14286	2.10703	2	1.1767	2	1.56893	2.57143	1.82775	1.78571	1.62569	13	1.53846	0.77625	2.23077	1.64083	2.07692	1.11516	2.07692	1.38212	2.76923	2.12736	1	H	none	undifferentiated		unclassified
546	eiche	dąb	27	3.2963	1.72793	1.37037	0.83887	1.62963	1.47148	1.59259	1.08342	1.2963	0.775332	14	4	1.6641	1.42857	0.937614	1.85714	1.74784	1.85714	1.29241	1.35714	0.744946	13	2.53846	1.5064	1.30769	0.751068	1.38462	1.1209	1.30769	0.751068	1.23077	0.83205	1	H	none	H		unclassified
2455	trachten	dążyć	26	4.03846	1.77721	1.57692	0.702742	1.61538	1.16883	2.5	1.70294	1.23077	0.514408	15	3.8	1.78085	1.66667	0.723747	1.73333	1.33452	2.73333	1.94447	1.26667	0.593617	11	4.36364	1.80404	1.45455	0.687552	1.45455	0.934199	2.18182	1.32802	1.18182	0.40452		H	none	H		unclassified
2113	schonung	dbać	26	5.07692	1.54721	1.30769	0.617688	1.57692	0.986836	1.5	0.761577	1.23077	0.514408	14	5.14286	1.91581	1.28571	0.61125	1.42857	0.851631	1.5	0.759555	1.14286	0.534522	12	5	1.04447	1.33333	0.651339	1.75	1.13818	1.5	0.797724	1.33333	0.492366	1	H	H	H		unclassified
477	debatte	debata	27	2.74074	1.76706	2.96296	1.84977	1.55556	1.36814	2.03704	1.50592	2	1.68705	14	2.57143	1.78516	3	1.75412	1.71429	1.5898	2.35714	1.94569	2	1.83973	13	2.92308	1.801	2.92308	2.01914	1.38462	1.1209	1.69231	0.751068	2	1.58114	1	A	none	undifferentiated		unclassified
298	beginn	debiutować	27	4.11111	1.47631	1.51852	1.18874	1.55556	1.28103	3.37037	2.11493	1.33333	1.03775	14	4.42857	1.45255	1.57143	1.01635	1.64286	1.39268	3.71429	2.16364	1.28571	0.61125	13	3.76923	1.48064	1.46154	1.39137	1.46154	1.19829	3	2.08167	1.38462	1.38675	1	H	none	blended	HF	unclassified
1885	puste	dech	26	2.38462	1.6267	1.46154	0.811456	2.11538	1.53172	2.46154	1.72582	1.34615	0.745241	15	2.6	1.84391	1.46667	0.833809	2.2	1.65616	2.4	1.84391	1.46667	0.915475	11	2.09091	1.30035	1.45455	0.8202	2	1.41421	2.54545	1.63485	1.18182	0.40452	1	F	none	undifferentiated		unclassified
480	defensiv	defensywny	26	1.73077	1.25085	2.38462	1.6267	1.84615	1.08415	2.61538	1.69887	1.80769	1.44275	13	1.53846	0.877058	2.53846	1.61325	1.69231	0.85485	2.92308	1.93484	1.76923	1.23517	13	1.92308	1.5525	2.23077	1.69085	2	1.29099	2.30769	1.4367	1.84615	1.67562		F	none	undifferentiated		F
481	defizit	deficyt	27	1.22222	0.50637	3.25926	1.95316	3.7037	1.91783	3.74074	1.89316	2.51852	2.0638	14	1.14286	0.363137	3	1.96116	3.78571	2.08211	3.64286	2.13423	2.21429	2.00686	13	1.30769	0.630425	3.53846	1.98391	3.61538	1.80455	3.84615	1.67562	2.84615	2.1543	1	F	none	undifferentiated		unclassified
482	dekadent	dekadencki	26	2.03846	1.37057	2.23077	1.77331	2.80769	2.17291	1.88462	1.39505	1.73077	1.45761	12	2.33333	1.66969	1.83333	1.2673	2.25	1.81534	1.33333	0.778499	1	0	14	1.78571	1.0509	2.57143	2.1018	3.28571	2.39963	2.35714	1.64584	2.35714	1.78054		S	none	undifferentiated		unclassified
2836	zart	delikatny	27	4.44444	1.9282	1.11111	0.320256	1.25926	0.655896	1.40741	0.797074	1.22222	0.800641	14	4.64286	2.16997	1.21429	0.425815	1.28571	0.726273	1.5	0.759555	1	0	13	4.23077	1.69085	1	0	1.23077	0.599145	1.30769	0.85485	1.46154	1.1266		H	H	H		unclassified
486	demokratie	demokracja	26	3.11538	1.58308	2.84615	1.75937	2.07692	1.32433	2.46154	1.74885	2.26923	1.56353	13	3.38462	1.80455	3	2.12132	1.76923	1.09193	2.69231	2.17503	2.23077	1.69085	13	2.84615	1.3445	2.69231	1.37747	2.38462	1.50214	2.23077	1.23517	2.30769	1.49358		H	none	undifferentiated		unclassified
485	demokrat	demokratyczny	26	3.15385	1.61722	2.65385	1.62339	2.23077	1.47804	2.42308	1.27037	2.03846	1.18257	13	3.30769	1.54837	2.53846	1.94145	2.07692	1.38212	2.07692	1.11516	1.76923	1.01274	13	3	1.73205	2.76923	1.30089	2.38462	1.60927	2.76923	1.36344	2.30769	1.31559	1	H	none	undifferentiated		unclassified
5	abbauen	demontować	26	2	1.91833	2.11538	1.79615	2.19231	1.744	2.11538	1.77374	1.69231	1.59422	12	1.75	1.54479	2.33333	1.77525	2.16667	1.52753	1.91667	1.72986	1.33333	0.887625	14	2.21429	2.22498	1.92857	1.85904	2.21429	1.96815	2.28571	1.85757	2	2		S	none	undifferentiated		unclassified
1654	necken	denerwować	26	1.19231	0.491466	5.03846	1.24838	2.34615	1.78756	2.11538	1.58308	2.26923	1.99113	12	1.25	0.452267	4.58333	1.1645	2.75	1.71226	2.91667	1.72986	2.16667	1.85047	14	1.14286	0.534522	5.42857	1.2225	2	1.83973	1.42857	1.08941	2.35714	2.16997		A	A	A		A
2832	zahnarzt	dentysta	27	1.7037	1.20304	2.59259	2.0987	2.55556	2.1183	4.59259	2.20592	2.74074	2.08645	14	1.42857	1.15787	3.21429	2.25929	3.07143	2.36852	5.28571	1.89852	3.14286	2.41333	13	2	1.22474	1.92308	1.75412	2	1.73205	3.84615	2.33973	2.30769	1.6525	1	F	none	F		F
490	dessert	deser	26	5.38462	1.57675	1.26923	1.00231	1.15385	0.464095	1.19231	0.491466	1	0	12	5.33333	1.96946	1.5	1.446	1.08333	0.288675	1.41667	0.668558	1	0	14	5.42857	1.2225	1.07143	0.267261	1.21429	0.578934	1	0	1	0	1	H	H	H		H
1931	regen	deszczowy	26	2.07692	1.41204	2.73077	1.88802	3.69231	1.82799	2.26923	1.6866	2.07692	1.62291	15	2	1.19523	2.73333	2.05171	3.86667	1.88478	2.13333	1.68466	1.8	1.26491	11	2.18182	1.72152	2.72727	1.73729	3.45455	1.80907	2.45455	1.75292	2.45455	2.0181	1	S	none	undifferentiated		S
2415	teufel	diabeł	26	1.88462	1.42343	3	1.9799	2.88462	1.75104	3.88462	1.88312	3.07692	1.97834	14	1.64286	1.00821	2.28571	1.89852	2.57143	1.55486	3.71429	1.81568	2.5	1.69842	12	2.16667	1.80067	3.83333	1.80067	3.25	1.95982	4.08333	2.02073	3.75	2.13733	1	F	none	undifferentiated		unclassified
493	diagnose	diagnozować	26	2.65385	1.95841	1.42308	0.856648	2.26923	1.56353	4	1.81108	1.69231	1.04954	12	2.75	2.0505	1.25	0.621582	2	1.53741	4	1.65145	1.33333	0.778499	14	2.57143	1.94992	1.57143	1.01635	2.5	1.60528	4	2	2	1.1767	1	F	none	F		F
494	dialekt	dialekt	26	3.11538	1.96625	1.46154	1.17408	1.15385	0.367946	1.5	0.948683	1.15385	0.464095	11	3.45455	1.86353	1.36364	0.6742	1	0	1.27273	0.64667	1	0	15	2.86667	2.06559	1.53333	1.45733	1.26667	0.457738	1.66667	1.1127	1.26667	0.593617	1	H	none	H		N
495	diamant	diamentowy	26	4.80769	1.83345	1.15385	0.784465	1.26923	0.874423	1.34615	1.05612	1	0	11	5.09091	1.97254	1.36364	1.20605	1.63636	1.28629	1.54545	1.50756	1	0	15	4.6	1.76473	1	0	1	0	1.2	0.560612	1	0	1	H	H	H		unclassified
1525	mild	dobroduszny	26	5.26923	1.40165	1.53846	0.947872	1.5	0.860233	1.30769	0.617688	1.19231	0.491466	14	4.85714	1.61041	1.64286	1.15073	1.5	0.94054	1.28571	0.61125	1.21429	0.578934	12	5.75	0.965307	1.41667	0.668558	1.5	0.797724	1.33333	0.651339	1.16667	0.389249		H	H	H		H
2802	wohltat	dobrodziejstwo	26	5.30769	1.51708	1.19231	0.401918	1.30769	0.617688	1.15385	0.464095	1.23077	0.58704	15	5.53333	1.35576	1.2	0.414039	1.26667	0.593617	1.13333	0.351866	1.2	0.560612	11	5	1.73205	1.18182	0.40452	1.36364	0.6742	1.18182	0.603023	1.27273	0.64667	1	H	H	H		H
2820	würdigen	doceniać	26	4.92308	2.01838	1.34615	1.01754	1.42308	1.06482	1.38462	1.0612	1.42308	1.17211	11	5.90909	1.446	1.54545	1.50756	1.63636	1.50151	1.90909	1.51357	1.45455	1.50756	15	4.2	2.11119	1.2	0.414039	1.26667	0.593617	1	0	1.4	0.910259		H	H	H		unclassified
566	einnahme	dochód	27	4.62963	1.88411	1.88889	1.25064	1.92593	1.35663	2.25926	1.50876	1.59259	1.44806	14	5.21429	1.67233	1.64286	1.33631	2	1.6641	1.71429	1.13873	1.5	1.60528	13	4	1.95789	2.15385	1.14354	1.84615	0.987096	2.84615	1.67562	1.69231	1.31559	1	H	H	H		unclassified
2880	zugabe	dodatek	26	4.34615	1.74224	1.34615	0.628796	1.38462	0.897861	1.42308	0.902134	1.38462	0.897861	14	3.92857	1.97929	1.21429	0.578934	1.21429	0.425815	1.28571	0.61125	1.21429	0.578934	12	4.83333	1.33712	1.5	0.6742	1.58333	1.24011	1.58333	1.1645	1.58333	1.1645	1	H	H	H		unclassified
1944	reife	dojrzały	26	4.34615	1.59856	1.65385	1.44062	1.80769	1.44275	2	1.35647	1.42308	0.643309	14	4	1.96116	1.71429	1.48989	1.92857	1.20667	2.14286	1.35062	1.5	0.650444	12	4.75	0.965307	1.58333	1.44338	1.66667	1.72328	1.83333	1.40346	1.33333	0.651339	1	H	H	H		unclassified
72	akribie	dokładność	26	5.07692	1.49461	1.30769	0.470679	1.34615	0.745241	1.65385	1.16421	1.19231	0.567044	14	4.78571	1.71772	1.35714	0.497245	1.14286	0.363137	1.57143	1.15787	1	0	12	5.41667	1.1645	1.25	0.452267	1.58333	0.996205	1.75	1.21543	1.41667	0.792961	1	H	H	H		unclassified
1311	leisten	dokonywać	27	4.11111	1.98714	1.55556	1.05003	1.40741	0.971092	2.03704	1.12597	1.2963	0.6688	14	4.78571	1.71772	1.85714	1.29241	1.5	0.85485	2.42857	1.2225	1.28571	0.468807	13	3.38462	2.06311	1.23077	0.599145	1.30769	1.1094	1.61538	0.869718	1.30769	0.85485		H	H	H		unclassified
512	doktor	doktor	26	2.5	1.47648	2.5	1.772	2.19231	1.62528	3.26923	1.82335	2.07692	1.52113	13	2.53846	1.26592	2.46154	1.8081	2.30769	1.6525	3.69231	1.75046	2.07692	1.44115	13	2.46154	1.71345	2.53846	1.8081	2.07692	1.65638	2.84615	1.86396	2.07692	1.65638	1	F	none	undifferentiated		unclassified
2313	sticheln	dokuczliwy	26	1.30769	1.01071	4.19231	2.00038	3.34615	2.01876	3.07692	2.11515	2.96154	2.10677	15	1.13333	0.351866	4.53333	1.72654	3.66667	2.02367	3.06667	2.15362	2.73333	2.1202	11	1.54545	1.50756	3.72727	2.3277	2.90909	2.0226	3.09091	2.16585	3.27273	2.149		A	none	undifferentiated		unclassified
513	dokument	dokument	26	2.5	1.88149	1.80769	1.29674	1.46154	0.706018	2.34615	1.59856	1.5	1.02956	14	1.85714	1.65748	1.78571	1.62569	1.21429	0.578934	2.35714	1.69193	1.07143	0.267261	12	3.25	1.91288	1.83333	0.834847	1.75	0.753778	2.33333	1.557	2	1.3484	1	H	none	undifferentiated		unclassified
2882	zuhause	dom	27	6.11111	1.18754	1.96296	1.40004	2.22222	1.62512	2	1.68705	1.44444	1.18754	14	6.21429	1.25137	1.57143	1.08941	2.07143	1.54244	1.78571	1.52812	1.28571	1.06904	13	6	1.1547	2.38462	1.60927	2.38462	1.75777	2.23077	1.87767	1.61538	1.3253	1	H	H	H		unclassified
515	dominanz	dominacja	26	2.26923	1.4299	3.11538	1.81828	2.42308	1.65343	3.11538	2.02636	2.30769	1.93431	11	1.90909	0.700649	3.45455	1.86353	2.90909	1.81409	3.63636	2.06265	2.45455	2.06706	15	2.53333	1.76743	2.86667	1.80739	2.06667	1.48645	2.73333	1.98086	2.2	1.89737	1	none	none	undifferentiated		unclassified
967	haus	domostwo	26	4.96154	1.79957	1.38462	0.697247	1.61538	1.09825	1.65385	1.29437	1.34615	1.23101	15	5.26667	1.70992	1.6	0.828079	1.73333	1.16292	1.4	0.632456	1.2	0.560612	11	4.54545	1.91644	1.09091	0.301511	1.45455	1.03573	2	1.84391	1.54545	1.80907	1	H	H	H		unclassified
2260	spitzel	donosić	27	1.33333	1.07417	4.74074	1.91337	3.37037	2.30631	3.55556	2.13638	4.59259	2.15298	14	1.64286	1.44686	5	1.61722	3.85714	2.17882	4.35714	1.94569	4.92857	1.8172	13	1	0	4.46154	2.22169	2.84615	2.40992	2.69231	2.05688	4.23077	2.48843	1	A	none	undifferentiated		unclassified
199	aufpreis	dopłata	26	2.46154	2.13973	3.88462	2.25081	3.15385	1.97367	3.23077	2.15977	2.5	2.02485	13	1.84615	1.90815	4.61538	2.14237	3.23077	2.27866	3.53846	2.14536	3.07692	2.326	13	3.07692	2.2532	3.15385	2.19265	3.07692	1.70595	2.92308	2.21591	1.92308	1.5525	1	A	none	undifferentiated		unclassified
316	beitragen	dopomóc	26	4.5	1.92354	2	1.69706	1.92308	1.49461	2.07692	1.52113	1.5	1.02956	12	4.75	1.71226	2.16667	1.80067	1.66667	0.887625	2.33333	1.66969	1.33333	0.651339	14	4.28571	2.12779	1.85714	1.65748	2.14286	1.87523	1.85714	1.40642	1.64286	1.27745		H	H	H		unclassified
330	beraten	doradzać	26	4.11538	1.68112	1.73077	1.11562	1.42308	0.702742	1.92308	1.16355	1.34615	0.745241	14	3.71429	1.9779	1.92857	1.32806	1.5	0.759555	1.92857	1.32806	1.42857	0.851631	12	4.58333	1.1645	1.5	0.797724	1.33333	0.651339	1.91667	0.996205	1.25	0.621582		H	H	H		unclassified
331	beratung	doradztwo	26	2.30769	1.82799	2.23077	1.94541	1.46154	1.02882	2.11538	1.50537	2.15385	1.68979	12	1.75	0.965307	2.83333	2.4433	1.41667	0.900337	2.25	1.76455	2.41667	1.83196	14	2.78571	2.25929	1.71429	1.26665	1.5	1.16024	2	1.30089	1.92857	1.59153	1	H	none	undifferentiated		unclassified
1354	liefern	dostarczać	27	3.74074	1.8312	1.66667	1.07417	1.48148	0.935224	2	1.30089	1.55556	1.18754	14	3.78571	1.62569	1.78571	1.18831	1.64286	1.08182	2.14286	1.29241	1.57143	1.08941	13	3.69231	2.09701	1.53846	0.967418	1.30769	0.751068	1.84615	1.3445	1.53846	1.33012		H	none	H		unclassified
1233	kriegen	dostawać	27	4.96296	1.76464	1.48148	0.848998	1.62963	1.07946	2.14815	1.45981	1.44444	0.9337	14	5.57143	1.28388	1.57143	0.851631	1.85714	1.02711	2.35714	1.08182	1.57143	1.01635	13	4.30769	2.01596	1.38462	0.869718	1.38462	1.1209	1.92308	1.801	1.30769	0.85485		H	H	H		unclassified
614	erfahren	doświadczać	27	3.88889	1.62512	2.07407	1.26873	2.48148	1.74026	2.59259	1.50024	1.81481	1.2721	14	4.35714	1.21574	2.5	1.3445	2.64286	1.21574	3.07143	1.38477	2.07143	1.38477	13	3.38462	1.89466	1.61538	1.04391	2.30769	2.21302	2.07692	1.49786	1.53846	1.1266		H	none	H		unclassified
615	erfahrung	doświadczony	26	4.38462	1.52517	2.03846	1.70835	1.65385	0.891843	2.07692	1.4676	1.53846	1.06699	13	4.30769	1.93152	2.53846	2.02548	1.69231	0.947331	2.30769	1.60128	1.46154	0.77625	13	4.46154	1.05003	1.53846	1.19829	1.61538	0.869718	1.84615	1.3445	1.61538	1.3253		H	H	H		unclassified
360	betreffen	dotyczyć	26	2.26923	1.40165	1.53846	0.989172	1.38462	0.803837	1.57692	0.986836	1.19231	0.491466	14	2.14286	1.61041	1.42857	0.937614	1.21429	0.578934	1.42857	0.937614	1	0	12	2.41667	1.1645	1.66667	1.07309	1.58333	0.996205	1.75	1.05529	1.41667	0.668558		H	none	undifferentiated		N
372	beweisen	dowodzić	27	3.81481	2.14901	1.66667	1.27098	1.40741	0.888355	3	1.83973	1.40741	0.693889	14	3.92857	2.269	1.42857	1.34246	1.5	1.09193	3.35714	2.27384	1.42857	0.755929	13	3.69231	2.09701	1.92308	1.18754	1.30769	0.630425	2.61538	1.19293	1.38462	0.650444		H	none	blended	HF	unclassified
371	beweis	dowód	27	3.48148	2.08235	1.59259	0.930643	1.44444	0.800641	2.07407	1.035	1.22222	0.50637	14	3.64286	1.98483	1.57143	0.937614	1.42857	0.755929	1.64286	0.633324	1.21429	0.425815	13	3.30769	2.25036	1.61538	0.960769	1.46154	0.877058	2.53846	1.19829	1.23077	0.599145	1	H	none	H		unclassified
2274	spüren	doznawać	27	4.62963	1.69043	1.66667	1.33012	1.92593	1.51723	2.22222	1.52753	1.62963	1.24493	14	4.35714	1.7368	2.07143	1.68543	2.35714	1.7368	2.57143	1.86936	2	1.56893	13	4.92308	1.65638	1.23077	0.599145	1.46154	1.1266	1.84615	0.987096	1.23077	0.599145		H	H	H		unclassified
1244	kuhle	dół	26	1.26923	0.724303	1.80769	1.54969	3.73077	1.71015	3.07692	2.09615	1.80769	1.54969	12	1	0	2	2	4.41667	1.44338	3.16667	2.03753	1.66667	1.72328	14	1.5	0.94054	1.64286	1.08182	3.14286	1.74784	3	2.2188	1.92857	1.43925	1	S	none	blended	SF	S
521	drama	dramat	27	1.59259	1.21716	3.25926	1.87273	4.33333	1.96116	4.07407	1.93998	2.51852	2.0638	14	1.64286	1.39268	3.64286	1.98483	5.42857	1.45255	5.21429	1.52812	3.14286	2.34872	13	1.53846	1.05003	2.84615	1.72463	3.15385	1.77229	2.84615	1.57301	1.84615	1.51911	1	S	none	undifferentiated		unclassified
2124	schuft	drań	27	1.66667	1.59326	4.59259	2.04299	3.48148	2.17274	3.22222	2.18972	3.33333	2.52678	14	1.5	1.28602	5.35714	1.69193	4.07143	2.269	4.28571	2.26779	4.21429	2.75062	13	1.84615	1.90815	3.76923	2.12736	2.84615	1.95133	2.07692	1.44115	2.38462	1.93815	1	A	none	undifferentiated		unclassified
1912	raubtier	drapieżny	26	2.11538	1.53172	1.84615	0.967153	1.42308	0.757526	3.53846	1.77157	1.53846	0.904689	12	2.16667	1.40346	2.08333	0.996205	1.58333	0.792961	3.41667	1.37895	1.83333	0.937437	14	2.07143	1.68543	1.64286	0.928783	1.28571	0.726273	3.64286	2.09788	1.28571	0.82542	1	F	none	F		F
1955	reizen	drażnić	27	1.66667	1.14354	4.88889	1.98714	2.62963	2.07824	2.59259	1.9857	2.74074	1.95316	14	1.42857	1.08941	5.71429	1.5898	3	2.51151	2.78571	2.35922	3.07143	2.30265	13	1.92308	1.18754	4	2.04124	2.23077	1.48064	2.38462	1.55662	2.38462	1.50214		A	A	A		A
2058	schauder	dreszcz	26	2.42308	1.50128	1.69231	1.01071	1.96154	1.24838	3.38462	1.67516	1.88462	1.21085	12	2.58333	1.31137	1.75	1.05529	2	1.3484	3.58333	1.62135	1.75	1.05529	14	2.28571	1.68379	1.64286	1.00821	1.92857	1.20667	3.21429	1.76193	2	1.35873	1	F	none	undifferentiated		F
1771	peiniger	dręczyciel	26	1.15385	0.612686	5.23077	1.88271	4.38462	2.3165	5.11538	2.00653	4.5	2.30217	11	1	0	5.54545	1.75292	5.36364	1.80404	6.18182	1.07872	4.72727	2.3277	15	1.26667	0.798809	5	2	3.66667	2.43975	4.33333	2.19306	4.33333	2.35028	1	A	none	undifferentiated		unclassified
1811	plagen	dręczyć	26	1.23077	0.514408	5.03846	1.58697	4.38462	2.04112	4.38462	2.09908	4.07692	2.36513	14	1.14286	0.534522	5.07143	1.26881	4.07143	2.09263	3.92857	2.1649	3.35714	2.40535	12	1.33333	0.492366	5	1.95402	4.75	2.00567	4.91667	1.97523	4.91667	2.10878		A	none	undifferentiated		unclassified
991	henne	drobiowy	26	2.80769	1.78928	1.19231	0.491466	1.30769	0.735893	1.34615	0.689481	1.34615	0.93562	12	3.33333	2.14617	1.08333	0.288675	1.25	0.866025	1.08333	0.288675	1	0	14	2.35714	1.33631	1.28571	0.61125	1.35714	0.633324	1.57143	0.851631	1.64286	1.21574	1	H	none	H		N
241	bakterie	drobnoustrój	26	1.61538	1.47179	2.61538	2.29916	2.34615	2.15299	3.34615	2.18984	3.96154	2.10677	12	1.16667	0.389249	2.58333	2.50303	2	2.13201	3.33333	2.26969	4.33333	2.38683	14	2	1.92154	2.64286	2.20514	2.64286	2.20514	3.35714	2.20514	3.64286	1.86495	1	D	none	undifferentiated		unclassified
2864	zierlich	drobny	26	3.15385	1.75937	1.42308	0.702742	1.76923	0.951113	1.69231	1.22537	1.34615	0.977438	15	3.33333	1.87718	1.4	0.632456	1.4	0.632456	1.73333	1.33452	1.13333	0.351866	11	2.90909	1.6404	1.45455	0.8202	2.27273	1.10371	1.63636	1.12006	1.63636	1.43337		H	none	H		unclassified
2743	weg	droga	27	3.96296	1.93115	1.77778	1.1547	2.11111	1.45002	2.55556	1.71718	1.48148	1.12217	14	4.5	2.17503	1.85714	1.29241	2.14286	1.56191	2.78571	1.88837	1.64286	1.33631	13	3.38462	1.50214	1.69231	1.03155	2.07692	1.38212	2.30769	1.54837	1.30769	0.85485		H	none	H		unclassified
2414	teuer	drogi	26	2.57692	1.90101	2.80769	1.85514	2.88462	1.79615	2.26923	1.86671	1.80769	1.64971	12	1.83333	1.11464	2.83333	1.52753	2.66667	1.37069	1.5	0.797724	1.25	0.452267	14	3.21429	2.22498	2.78571	2.15473	3.07143	2.12908	2.92857	2.269	2.28571	2.12779		S	none	undifferentiated		unclassified
973	hefe	drożdżowy	27	3.51852	1.90889	1.2963	0.6688	1.2963	0.608581	1.37037	0.791695	1.48148	1.01414	14	3.71429	1.54066	1.5	0.85485	1.42857	0.646206	1.42857	0.755929	1.64286	0.928783	13	3.30769	2.28709	1.07692	0.27735	1.15385	0.5547	1.30769	0.85485	1.30769	1.1094	1	H	H	H		unclassified
1455	mannschaft	drużynowy	27	3.37037	1.82184	2	1.56893	1.85185	1.51159	1.96296	1.53125	1.62963	1.30526	14	3.07143	1.59153	2.14286	1.23146	1.92857	1.07161	1.92857	1.38477	1.71429	0.913874	13	3.69231	2.05688	1.84615	1.90815	1.76923	1.92154	2	1.73205	1.53846	1.6641		H	none	H		unclassified
1952	reißen	drzeć	26	1.11538	0.325813	4.07692	2.0381	2.26923	1.92993	2.57692	2.10092	2.30769	1.97523	12	1.08333	0.288675	4.41667	2.02073	2.25	2.0505	2.58333	2.23437	2	1.85864	14	1.14286	0.363137	3.78571	2.08211	2.28571	1.89852	2.57143	2.06488	2.57143	2.1018		A	none	A		A
265	baum	drzewo	26	4.80769	1.64971	1.11538	0.431455	2.23077	1.79572	1.57692	1.30148	1.11538	0.431455	13	4.92308	1.801	1.23077	0.599145	2.30769	2.17503	1.92308	1.70595	1.23077	0.599145	13	4.69231	1.54837	1	0	2.15385	1.40512	1.23077	0.599145	1	0	1	H	H	H		unclassified
850	geist	duch	26	1.92308	1.32433	1.80769	1.35703	2.84615	1.73649	3.84615	1.86959	1.80769	1.41476	14	1.28571	0.82542	1.57143	0.851631	2.57143	1.74154	3.92857	1.68543	1.64286	1.39268	12	2.66667	1.43548	2.08333	1.78164	3.16667	1.74946	3.75	2.13733	2	1.4771	1	F	none	undifferentiated		F
1763	pater	duchowny	26	2.46154	1.74885	2.46154	1.88108	2.07692	1.76461	2.15385	1.78196	2.34615	1.85348	15	2.46667	1.88478	2.26667	1.79151	2	1.19523	1.53333	0.743223	1.86667	1.0601	11	2.45455	1.63485	2.72727	2.05382	2.18182	2.40076	3	2.40832	3	2.48998	1	none	none	undifferentiated		unclassified
2322	stolz	dumny	26	4.73077	1.48479	1.88462	1.60815	1.88462	1.70474	1.69231	1.51708	1.5	1.10454	13	5	1.68325	1.76923	1.69085	2.30769	2.17503	2	2.04124	1.15385	0.375534	13	4.46154	1.26592	2	1.58114	1.46154	0.967418	1.38462	0.650444	1.84615	1.46322	1	H	H	H		unclassified
170	arsch	dupa	26	2.69231	1.8925	2.07692	1.41204	1.30769	0.679366	1.38462	0.803837	2.53846	1.65483	12	2.08333	1.50504	1.91667	0.996205	1.5	0.797724	1.75	1.05529	2.83333	1.85047	14	3.21429	2.08211	2.21429	1.71772	1.14286	0.534522	1.07143	0.267261	2.28571	1.48989	1	H	none	undifferentiated		unclassified
2444	torheit	durnowaty	27	1.74074	1.05948	3.44444	2.10006	2.2963	1.79347	2.07407	1.61545	2.88889	2.02548	14	2.14286	1.09945	3.92857	1.97929	2.64286	1.90575	2.64286	1.90575	3.57143	2.24343	13	1.30769	0.85485	2.92308	2.17798	1.92308	1.65638	1.46154	0.967418	2.15385	1.51911	1	A	none	undifferentiated		unclassified
181	atemnot	dusić	26	1.03846	0.196116	4.5	2.26716	3.46154	2.31915	5.07692	1.76461	3.92308	2.22572	12	1	0	4.25	2.22077	3.66667	2.38683	5.41667	1.97523	4.66667	2.05971	14	1.07143	0.267261	4.71429	2.36736	3.28571	2.33464	4.78571	1.57766	3.28571	2.23361	1	F	none	undifferentiated		unclassified
2149	seele	dusza	26	4.30769	1.78369	1.57692	1.02657	2.96154	1.75455	3.15385	1.73649	1.5	1.2083	13	4.92308	1.38212	1.76923	1.16575	3.46154	1.71345	3.30769	1.70219	1.69231	1.54837	13	3.69231	1.97419	1.38462	0.869718	2.46154	1.71345	3	1.82574	1.30769	0.751068	1	H	none	blended	HFS	unclassified
2872	zittern	dygotać	26	1.42308	1.23849	2.46154	1.83806	2.92308	1.76461	3.42308	2.00346	2	1.89737	12	1.5	1.73205	2.25	1.65831	3.08333	1.97523	2.75	1.91288	1.58333	1.72986	14	1.35714	0.633324	2.64286	2.02322	2.78571	1.62569	4	1.96116	2.35714	2.02322		F	none	undifferentiated		unclassified
503	diktatur	dyktatura	27	1.55556	1.28103	3.92593	1.83818	3.07407	2.0367	3.66667	1.81871	3.62963	1.90441	14	1.85714	1.56191	4.5	1.69842	3.92857	1.94004	4.28571	1.68379	4.14286	1.87523	13	1.23077	0.83205	3.30769	1.84321	2.15385	1.77229	3	1.77951	3.07692	1.84669	1	A	none	undifferentiated		unclassified
504	dilemma	dylemat	26	1.53846	0.989172	2.5	1.36382	2.34615	1.46812	3.5	1.52971	1.46154	0.646886	12	1.58333	1.1645	2.16667	1.11464	2.58333	1.50504	3.58333	1.31137	1.33333	0.492366	14	1.5	0.85485	2.78571	1.52812	2.14286	1.46009	3.42857	1.74154	1.57143	0.755929	1	F	none	F		F
1257	kürbis	dynia	27	2.96296	1.7863	1.48148	0.935224	1.40741	0.930643	1.62963	1.21365	1.37037	0.83887	14	3.28571	1.5898	1.71429	1.13873	1.64286	1.15073	1.5	0.94054	1.57143	1.01635	13	2.61538	1.98068	1.23077	0.599145	1.15385	0.5547	1.76923	1.48064	1.15385	0.5547	1	H	none	H		N
506	diplom	dyplom	27	5.81481	1.11068	1.55556	1.08604	1.44444	0.891556	2.2963	1.65981	1.14815	0.601518	14	6.14286	0.949262	1.57143	1.34246	1.42857	0.646206	1.92857	1.49174	1.07143	0.267261	13	5.46154	1.19829	1.53846	0.77625	1.46154	1.1266	2.69231	1.79743	1.23077	0.83205	1	H	H	H		H
507	diplomat	dyplomatyczny	26	3.07692	1.76461	2.34615	1.62339	1.76923	1.1767	2.11538	1.63284	1.69231	1.37896	13	3.38462	1.66024	2.30769	1.49358	1.61538	1.04391	2.69231	2.01596	1.46154	0.877058	13	2.76923	1.87767	2.38462	1.80455	1.92308	1.32045	1.53846	0.877058	1.92308	1.75412	1	H	none	undifferentiated		unclassified
509	diskussion	dyskutować	26	3.92308	1.59808	2.42308	1.50128	1.5	1.02956	2	1.38564	1.38462	1.23538	14	3.64286	1.82323	2.14286	1.35062	1.21429	0.425815	1.71429	1.20439	1.14286	0.534522	12	4.25	1.28806	2.75	1.65831	1.83333	1.40346	2.33333	1.557	1.66667	1.72328		H	none	H		unclassified
2609	verfügen	dysponować	26	3.88462	2.02636	1.30769	0.679366	1.19231	0.491466	1.5	0.860233	1.15385	0.464095	12	4.08333	1.72986	1.25	0.452267	1.16667	0.389249	1.5	0.6742	1.08333	0.288675	14	3.71429	2.30146	1.35714	0.841897	1.21429	0.578934	1.5	1.01905	1.21429	0.578934		H	H	H		unclassified
2610	verfügung	dyspozycyjny	27	3.77778	1.94804	1.96296	1.55617	1.2963	0.724028	1.7037	1.10296	1.74074	1.34715	14	4.5	1.7867	1.5	1.16024	1.21429	0.801784	1.57143	0.937614	1.57143	1.28388	13	3	1.87083	2.46154	1.8081	1.38462	0.650444	1.84615	1.28103	1.92308	1.44115		H	none	H		unclassified
2410	teppich	dywan	26	2.42308	1.30148	1.15385	0.612686	1.11538	0.431455	1.11538	0.588348	1.23077	0.651625	12	2.33333	1.30268	1.08333	0.288675	1.08333	0.288675	1	0	1.08333	0.288675	14	2.5	1.3445	1.21429	0.801784	1.14286	0.534522	1.21429	0.801784	1.35714	0.841897	1	H	none	H		N
1105	kanne	dzbanek	26	2.61538	1.81278	1.34615	0.891843	1.34615	0.891843	1.30769	0.837579	1.26923	0.77757	12	2.33333	1.61433	1.16667	0.57735	1.08333	0.288675	1.08333	0.288675	1.16667	0.57735	14	2.85714	1.9945	1.5	1.09193	1.57143	1.15787	1.5	1.09193	1.35714	0.928783	1	H	none	H		N
1416	macher	działacz	27	3.07407	2.0367	2.11111	1.52753	1.48148	1.08735	1.66667	1.1767	1.59259	1.2788	14	3.21429	2.11873	1.64286	1.08182	1.14286	0.363137	1.35714	0.744946	1.21429	0.578934	13	2.92308	2.01914	2.61538	1.80455	1.84615	1.46322	2	1.47196	2	1.68325	1	H	none	undifferentiated		unclassified
2793	wirken	działać	26	4.42308	1.67745	1.53846	0.947872	1.53846	1.42073	2.03846	1.37057	1.34615	0.845804	12	4.33333	1.77525	1.5	0.6742	1.41667	1.1645	2.16667	1.2673	1.41667	0.900337	14	4.5	1.6525	1.57143	1.15787	1.64286	1.64584	1.92857	1.49174	1.28571	0.82542		H	H	H		unclassified
2391	tätigkeit	działalność	26	3.57692	1.67745	1.84615	1.08415	1.73077	1.11562	2.57692	1.52769	1.38462	1.26734	15	3.13333	1.45733	1.86667	0.99043	1.86667	0.99043	2.46667	1.40746	1.26667	0.703732	11	4.18182	1.83402	1.81818	1.25045	1.54545	1.29334	2.72727	1.73729	1.54545	1.80907		H	none	undifferentiated		unclassified
2794	wirkung	działanie	27	5	1.59326	1.59259	0.971092	1.18519	0.68146	2.74074	1.48305	1.33333	0.877058	14	5.21429	1.42389	1.42857	0.851631	1.21429	0.801784	2.92857	1.68543	1.35714	0.928783	13	4.76923	1.7867	1.76923	1.09193	1.15385	0.5547	2.53846	1.26592	1.30769	0.85485	1	H	H	H		unclassified
933	grundstück	działka	26	4.30769	1.87124	2.03846	1.45549	2.15385	1.40548	1.84615	1.15559	1.34615	0.79711	14	4.35714	1.86495	2	1.7097	2	1.24035	1.92857	1.20667	1	0	12	4.25	1.95982	2.08333	1.1645	2.33333	1.61433	1.75	1.13818	1.75	1.05529		H	H	H		unclassified
764	forsch	dziarski	26	3.80769	1.87658	1.73077	1.11562	1.19231	0.567044	1.42308	0.986836	1.23077	0.58704	14	3.57143	1.94992	1.71429	1.13873	1	0	1.35714	0.841897	1.21429	0.578934	12	4.08333	1.83196	1.75	1.13818	1.41667	0.792961	1.5	1.16775	1.25	0.621582		H	H	H		unclassified
1145	kind	dziecko	27	4.59259	2.02407	2.18519	1.52005	2	1.38675	2.44444	1.90815	1.85185	1.65724	14	4.92857	1.85904	2.85714	1.65748	2.35714	1.59842	3.07143	2.20015	1.85714	1.61041	13	4.23077	2.20431	1.46154	0.967418	1.61538	1.04391	1.76923	1.30089	1.84615	1.77229	1	H	H	H		unclassified
608	erbin	dziedziczyć	27	4.66667	2.05688	1.96296	1.55617	2.18519	1.44214	2.51852	1.55342	1.55556	1.31071	14	4.92857	2.12908	1.71429	1.38278	1.92857	1.49174	2.21429	1.0509	1.14286	0.363137	13	4.38462	2.02231	2.23077	1.73944	2.46154	1.39137	2.84615	1.95133	2	1.77951	1	H	H	H		unclassified
333	bereich	dziedzina	26	2.19231	1.83345	1.5	1.33417	1.61538	1.35873	1.73077	1.51149	1.38462	0.803837	12	2	1.53741	1.33333	0.887625	1.5	1	1.75	1.05529	1.33333	0.887625	14	2.35714	2.09788	1.64286	1.64584	1.71429	1.63747	1.71429	1.85757	1.42857	0.755929	1	H	none	undifferentiated		N
2402	teilen	dzielić	26	3.57692	2.043	1.80769	1.54969	1.96154	1.24838	1.53846	1.1395	1.15385	0.367946	12	2.83333	1.99241	1.33333	0.651339	1.75	0.753778	1.41667	0.792961	1.08333	0.288675	14	4.21429	1.92867	2.21429	1.96815	2.14286	1.56191	1.64286	1.39268	1.21429	0.425815		H	none	H		unclassified
2383	tapfer	dzielny	27	4.74074	1.55891	1.44444	0.751068	1.62963	1.24493	2.11111	1.2195	1.2963	1.10296	14	5.07143	1.43925	1.5	0.759555	1.64286	1.33631	2.21429	1.18831	1	0	13	4.38462	1.66024	1.38462	0.767948	1.61538	1.19293	2	1.29099	1.61538	1.55662		H	H	H		unclassified
2774	werk	dzieło	26	4.53846	2.00461	1.34615	0.891843	1.19231	0.491466	1.46154	0.859338	1.34615	1.23101	14	4.35714	2.23975	1.21429	0.578934	1.21429	0.425815	1.42857	0.937614	1.14286	0.534522	12	4.75	1.76455	1.5	1.16775	1.16667	0.57735	1.5	0.797724	1.58333	1.72986	1	H	H	H		unclassified
2371	tag	dzień	26	4.11538	2.35503	1.69231	1.22537	1.69231	1.15825	2	1.38564	1.38462	0.897861	11	4.36364	2.57964	1.90909	1.57826	1.90909	1.30035	2.18182	1.83402	1.27273	0.904534	15	3.93333	2.25093	1.53333	0.915475	1.53333	1.0601	1.86667	0.99043	1.46667	0.915475		H	none	H		unclassified
1518	mieten	dzierżawić	27	2.77778	1.90815	1.96296	1.45395	1.55556	1.01274	1.74074	1.22765	1.62963	1.41824	14	3	2.11224	1.78571	1.18831	1.64286	1.21574	1.85714	1.16732	1.57143	1.60357	13	2.53846	1.71345	2.15385	1.72463	1.46154	0.77625	1.61538	1.3253	1.69231	1.25064		H	none	undifferentiated		unclassified
1419	mädchen	dziewczyna	27	5.14815	2.07	1.62963	1.11452	1.59259	1.18514	1.7037	1.1373	1.25926	0.764229	14	4.42857	2.53329	1.85714	1.40642	1.42857	1.08941	1.57143	1.28388	1.35714	0.928783	13	5.92308	1.03775	1.38462	0.650444	1.76923	1.30089	1.84615	0.987096	1.15385	0.5547	1	H	H	H		unclassified
1082	jungfrau	dziewica	26	3.88462	1.88312	1.61538	1.29852	1.69231	1.19228	2.38462	1.87781	1.23077	0.815239	12	3.58333	2.02073	1.66667	1.37069	1.91667	1.31137	2.25	1.91288	1.41667	1.1645	14	4.14286	1.79131	1.57143	1.28388	1.5	1.09193	2.5	1.9115	1.07143	0.267261	1	H	none	H		unclassified
468	danken	dziękować	27	5.37037	1.69043	1.25926	0.764229	1.2963	0.868899	1.37037	0.791695	1.2963	0.775332	14	5.5	1.74312	1.35714	0.928783	1.57143	1.15787	1.5	1.01905	1.42857	0.937614	13	5.23077	1.69085	1.15385	0.5547	1	0	1.23077	0.438529	1.15385	0.5547		H	H	H		H
1379	loch	dziura	27	2.22222	1.98714	1.92593	1.54237	1.81481	1.59415	2.37037	1.52286	1.81481	1.59415	14	2.28571	1.72888	2	1.41421	2.14286	1.51186	2.35714	1.15073	1.85714	1.29241	13	2.15385	2.30384	1.84615	1.72463	1.46154	1.6641	2.38462	1.89466	1.76923	1.92154	1	F	none	undifferentiated		unclassified
1380	locher	dziurawy	26	1.42308	1.10175	3.69231	1.80597	3.46154	1.72582	2.5	1.88149	2.88462	2.06547	15	1.6	1.35225	3.73333	2.05171	3.13333	1.9223	2.6	1.95667	2.33333	1.83874	11	1.18182	0.603023	3.63636	1.50151	3.90909	1.3751	2.36364	1.85864	3.63636	2.2033	1	A	none	undifferentiated		unclassified
777	freier	dziwkarz	26	1.11538	0.431455	4.65385	2.54468	3.80769	2.54589	2.61538	2.35078	4.69231	2.34554	13	1	0	5.30769	2.32324	4.46154	2.90446	3.38462	2.72453	5.92308	1.49786	13	1.23077	0.599145	4	2.67706	3.15385	2.03495	1.84615	1.67562	3.46154	2.43637	1	D	none	undifferentiated		unclassified
2167	seltsam	dziwny	26	2.11538	1.53172	2.07692	1.52113	2.11538	1.39505	3.19231	1.62528	2.69231	1.76112	12	1.75	1.05529	2	1.7581	1.83333	1.02986	3.5	1.446	3.16667	1.6967	14	2.42857	1.82775	2.14286	1.35062	2.35714	1.64584	2.92857	1.77436	2.28571	1.77281		F	none	undifferentiated		unclassified
912	glocke	dzwon	26	2.96154	1.92833	1.42308	0.945434	1.61538	1.23538	1.88462	1.63284	1.30769	1.04954	13	3.07692	1.97744	1.53846	1.19829	2	1.47196	2.23077	1.87767	1.23077	0.599145	13	2.84615	1.95133	1.30769	0.630425	1.23077	0.83205	1.53846	1.33012	1.38462	1.38675	1	H	none	undifferentiated		unclassified
1166	klingel	dzwonek	26	3.30769	2.01533	2.30769	1.71509	1.76923	1.21021	2.26923	1.66271	1.73077	1.18516	11	3.54545	2.16165	2.54545	2.0181	1.63636	1.20605	1.90909	1.6404	1.45455	0.934199	15	3.13333	1.95911	2.13333	1.50555	1.86667	1.24595	2.53333	1.68466	1.93333	1.33452	1	H	none	undifferentiated		unclassified
141	anrufen	dzwonić	27	3.59259	1.90665	2.25926	1.70051	1.81481	1.33119	2.33333	1.86052	1.48148	1.22067	14	3.92857	1.63915	2.5	1.60528	1.92857	0.916875	2.5	1.7867	1.5	0.650444	13	3.23077	2.16617	2	1.82574	1.69231	1.70219	2.15385	1.99358	1.46154	1.6641		H	none	H		unclassified
2278	stachlig	dźgać	27	1.2963	0.724028	4	2.18386	3.07407	2.2001	4.44444	2.3094	3.62963	2.43608	14	1.35714	0.841897	5.14286	1.83375	3.64286	2.43712	5	2.35339	4.28571	2.58482	13	1.23077	0.599145	2.76923	1.87767	2.46154	1.8081	3.84615	2.19265	2.92308	2.13937		F	none	undifferentiated		unclassified
1153	klang	dźwięk	26	5	1.67332	2.34615	1.09334	1.92308	1.05539	1.84615	1.15559	1.38462	0.803837	14	4.5	1.95133	2.21429	1.12171	1.64286	0.841897	1.85714	1.35062	1.21429	0.578934	12	5.58333	1.08362	2.5	1.08711	2.25	1.21543	1.83333	0.937437	1.58333	0.996205	1	H	H	H		unclassified
972	heben	dźwigać	26	1.38462	0.803837	2.42308	1.70113	2.11538	1.45126	1.46154	0.706018	1.61538	0.897861	12	1.25	0.621582	2.41667	1.31137	2.66667	1.77525	1.83333	0.834847	1.5	0.797724	14	1.5	0.94054	2.42857	2.02729	1.64286	0.928783	1.14286	0.363137	1.71429	0.99449		A	none	undifferentiated		A
971	hebel	dźwignia	27	2.40741	1.80297	1.48148	1.05139	1.37037	1.00568	1.85185	1.35032	1.11111	0.320256	14	2	1.7097	1.28571	1.06904	1.14286	0.534522	1.85714	1.70326	1	0	13	2.84615	1.86396	1.69231	1.03155	1.61538	1.3253	1.84615	0.898717	1.23077	0.438529	1	H	none	undifferentiated		N
1782	pest	dżuma	26	1	0	2.5	1.72627	3.65385	2.07735	4.57692	2.11987	4.23077	2.33765	12	1	0	2.58333	0.900337	3.25	1.54479	4.16667	1.85047	4.08333	2.06522	14	1	0	2.42857	2.24343	4	2.44949	4.92857	2.33582	4.35714	2.61966	1	F	none	undifferentiated		unclassified
1328	lernen	edukować	26	4	1.74356	1.46154	0.904689	1.53846	1.02882	1.88462	1.47856	1.26923	0.533494	12	4.5	1.31426	1.33333	0.651339	1.58333	1.24011	2.16667	1.6967	1.33333	0.651339	14	3.57143	1.98898	1.57143	1.08941	1.5	0.85485	1.64286	1.27745	1.21429	0.425815		H	H	H		unclassified
538	effekt	efekt	27	4.74074	1.91337	1.22222	0.50637	1.14815	0.456045	1.96296	1.34397	1.03704	0.19245	14	4.78571	1.88837	1.14286	0.363137	1	0	1.85714	1.46009	1	0	13	4.69231	2.01596	1.30769	0.630425	1.30769	0.630425	2.07692	1.25576	1.07692	0.27735	1	H	H	H		unclassified
539	egoismus	egoistyczny	26	1.34615	1.23101	4.92308	1.49461	3.30769	1.95488	2.46154	2.12096	4.15385	2.57204	12	1	0	5.58333	1.37895	4	2.17423	3.25	2.52713	5.66667	2.14617	14	1.64286	1.64584	4.35714	1.39268	2.71429	1.5898	1.78571	1.47693	2.85714	2.21384	1	A	none	undifferentiated		unclassified
669	existenz	egzystencjalny	27	3	1.77591	1.77778	1.45002	2.2963	1.4362	2.14815	1.53682	1.33333	1.07417	14	3.28571	1.85757	2	1.24035	2.42857	1.45255	2.85714	1.79131	1.28571	0.726273	13	2.69231	1.70219	1.53846	1.6641	2.15385	1.46322	1.38462	0.650444	1.38462	1.38675	1	H	none	undifferentiated		unclassified
1310	leinwand	ekran	26	3.03846	1.96938	1.57692	1.4191	1.69231	1.40767	1.5	1.24097	1.30769	1.19228	13	2.76923	2.20431	1.76923	1.69085	1.84615	1.72463	1.69231	1.6525	1.53846	1.6641	13	3.30769	1.75046	1.38462	1.1209	1.53846	1.05003	1.30769	0.630425	1.07692	0.27735	1	H	none	H		unclassified
579	ekstase	ekstaza	27	5.40741	1.50024	1.66667	1.51911	1.18519	0.622466	2.11111	1.76141	1.25926	0.655896	14	5.71429	1.5898	1.21429	0.578934	1	0	1.42857	1.34246	1.07143	0.267261	13	5.07692	1.38212	2.15385	2.03495	1.38462	0.869718	2.84615	1.90815	1.46154	0.877058	1	H	H	H		unclassified
741	flexibel	elastyczny	27	4.03704	1.82886	1.40741	1.24836	1.44444	1.31071	1.51852	1.31179	1.48148	1.25178	14	3.5	1.99036	1.64286	1.64584	1.64286	1.64584	1.57143	1.60357	1.57143	1.60357	13	4.61538	1.50214	1.15385	0.5547	1.23077	0.83205	1.46154	0.967418	1.38462	0.767948		H	H	H		unclassified
721	fibel	elementarz	26	2.88462	1.88312	1.46154	1.17408	1.61538	1.13409	1.34615	0.79711	1.26923	0.827415	12	3.16667	2.03753	1.41667	0.900337	1.83333	1.33712	1.41667	0.996205	1.25	0.866025	14	2.64286	1.78054	1.5	1.40055	1.42857	0.937614	1.28571	0.61125	1.28571	0.82542	1	H	none	H		N
583	embargo	embargo	26	1.46154	0.947872	2.84615	1.9533	2.46154	1.77157	2.92308	2.20768	2	1.81108	11	2.09091	1.22103	2.72727	1.95402	2.18182	1.16775	2.72727	1.67874	2.27273	2.00454	15	1	0	2.93333	2.0166	2.66667	2.12692	3.06667	2.57645	1.8	1.69874	1	F	none	undifferentiated		unclassified
1963	rente	emerytalny	26	1.92308	1.41204	1.84615	1.43366	2.53846	1.72582	2.76923	1.81786	1.61538	1.23538	12	2.33333	1.61433	1.16667	0.389249	2.5	1.73205	2.16667	1.64225	1.33333	0.778499	14	1.57143	1.15787	2.42857	1.74154	2.57143	1.78516	3.28571	1.85757	1.85714	1.51186	1	F	none	undifferentiated		unclassified
584	emotion	emocja	26	3.26923	2.03091	2	1.54919	2.26923	1.80128	2.46154	2.02447	1.53846	0.947872	12	3.25	1.95982	2.16667	1.4668	2.08333	1.62135	2.58333	2.2747	1.66667	0.984732	14	3.28571	2.16364	1.85714	1.65748	2.42857	1.98898	2.35714	1.86495	1.42857	0.937614	1	H	none	undifferentiated		unclassified
591	energie	energiczny	26	5	1.69706	2	1.74356	1.34615	0.891843	1.65385	1.09334	1.30769	0.735893	15	5.2	1.85934	2.4	2.06328	1.53333	1.12546	1.66667	1.1127	1.33333	0.617213	11	4.72727	1.48936	1.45455	1.03573	1.09091	0.301511	1.63636	1.12006	1.27273	0.904534	1	H	H	H		unclassified
641	erotik	erotyczny	26	4.57692	2.08179	1.73077	1.04145	2	1.67332	2.26923	1.61388	1.65385	1.05612	15	4.53333	2.06559	1.86667	1.0601	1.86667	1.50555	2.26667	1.53375	1.4	0.828079	11	4.63636	2.2033	1.54545	1.03573	2.18182	1.94001	2.27273	1.79393	2	1.26491	1	H	H	H		unclassified
664	ethik	etyczny	26	4.5	1.98494	1.5	0.905539	1.46154	0.811456	1.69231	1.19228	1.15385	0.464095	11	5.81818	0.873863	1.27273	0.467099	1.54545	0.687552	1.81818	1.25045	1	0	15	3.53333	2.03072	1.66667	1.1127	1.4	0.910259	1.6	1.18322	1.26667	0.593617	1	H	H	H		unclassified
666	euphorie	euforyczny	26	4.69231	1.73826	1.34615	0.745241	1.30769	0.735893	1.42308	0.902134	1.15385	0.464095	12	4.83333	1.40346	1.33333	0.887625	1.41667	0.996205	1.41667	0.996205	1.16667	0.57735	14	4.57143	2.02729	1.35714	0.633324	1.21429	0.425815	1.42857	0.851631	1.14286	0.363137	1	H	H	H		unclassified
2662	verwandeln	ewoluować	27	4	1.68705	1.59259	0.930643	1.48148	0.802418	1.88889	1.18754	1.55556	0.974022	14	4	1.6641	1.78571	0.974961	1.57143	0.755929	2.14286	1.35062	1.71429	1.06904	13	4	1.77951	1.38462	0.869718	1.38462	0.869718	1.61538	0.960769	1.38462	0.869718		H	H	H		unclassified
671	fabrik	fabryka	26	2.07692	1.71868	2.46154	1.9643	2.46154	1.70249	2.73077	2.2371	2.53846	2.00461	12	1.5	1.24316	2.91667	2.23437	2.41667	1.83196	2.75	2.34036	3.33333	2.34844	14	2.57143	1.94992	2.07143	1.68543	2.5	1.6525	2.71429	2.23361	1.85714	1.40642	1	F	none	undifferentiated		unclassified
1787	pfeife	fajka	26	3	2	1.69231	1.34964	1.88462	1.47856	1.96154	1.61197	2.30769	1.78369	15	2.93333	1.94447	1.66667	0.9759	1.4	0.632456	1.8	1.42428	1.8	1.14642	11	3.09091	2.16585	1.72727	1.79393	2.54545	2.0181	2.18182	1.88776	3	2.28035	1	H	none	undifferentiated		unclassified
2462	trampel	fajtłapa	26	1.88462	1.10732	3.61538	1.94066	3.26923	1.88802	2.38462	2.04112	2.69231	2.03508	13	1.76923	1.23517	4.15385	2.03495	3.53846	2.14536	2.92308	2.4311	2.84615	2.30384	13	2	1	3.07692	1.75412	3	1.63299	1.84615	1.46322	2.53846	1.8081	1	A	none	undifferentiated		unclassified
2393	tatsache	fakt	26	2.65385	1.85348	2.42308	1.44701	2.11538	1.36607	2.34615	1.76505	1.84615	1.12044	12	3.16667	2.08167	2.83333	1.52753	2.33333	1.557	2.5	1.93061	2.16667	1.2673	14	2.21429	1.57766	2.07143	1.32806	1.92857	1.20667	2.21429	1.67233	1.57143	0.937614	1	H	none	undifferentiated		unclassified
2763	welle	fala	26	3.53846	1.9643	1.61538	0.852147	1.57692	1.10175	2.80769	1.60048	1.26923	0.874423	12	3.58333	2.02073	1.5	0.797724	1.75	1.05529	2.91667	1.50504	1.16667	0.57735	14	3.5	1.99036	1.71429	0.913874	1.42857	1.15787	2.71429	1.72888	1.35714	1.08182	1	H	none	blended	HF	unclassified
688	fantasie	fantazja	26	5.03846	1.88639	1.69231	1.43581	2	1.49666	2.23077	1.77331	1.73077	1.63848	12	4.66667	2.14617	1.83333	1.74946	1.66667	1.07309	2.08333	1.50504	1.58333	1.44338	14	5.35714	1.64584	1.57143	1.15787	2.28571	1.77281	2.35714	2.02322	1.85714	1.83375	1	H	H	H		unclassified
2131	schürze	fartuch	27	2.37037	1.52286	1.62963	1.00568	1.66667	1.14354	1.62963	1.21365	1.81481	1.46857	14	2.57143	1.78516	1.71429	1.20439	1.28571	0.468807	1.42857	1.08941	1.5	1.16024	13	2.15385	1.21423	1.53846	0.77625	2.07692	1.49786	1.84615	1.3445	2.15385	1.72463	1	H	none	undifferentiated		unclassified
693	fassade	fasada	26	2.38462	1.79057	1.42308	0.986836	1.46154	1.10384	1.57692	1.27037	1.5	1.24097	12	2.25	1.42223	1.58333	1.1645	1.58333	1.1645	1.75	1.21543	1.58333	1.1645	14	2.5	2.10311	1.28571	0.82542	1.35714	1.08182	1.42857	1.34246	1.42857	1.34246	1	H	none	undifferentiated		N
412	bohne	fasola	26	2.23077	1.45073	1.65385	1.23101	1.46154	0.947872	1.26923	0.603834	2.07692	1.64738	15	2	1.46385	1.53333	1.18723	1.26667	0.703732	1.13333	0.516398	1.93333	1.66762	11	2.54545	1.4397	1.81818	1.32802	1.72727	1.19087	1.45455	0.687552	2.27273	1.67874	1	H	none	undifferentiated		N
692	faschismus	faszyzm	26	1	0	5.34615	1.59856	4.23077	2.06509	4.84615	1.84808	5.38462	2.07994	12	1	0	5.75	1.3568	3.91667	2.35327	5.41667	1.56428	5.83333	1.74946	14	1	0	5	1.75412	4.5	1.82925	4.35714	1.98483	5	2.32048		D	none	undifferentiated		unclassified
2100	schlimm	fatalny	27	1.07407	0.26688	4.2963	1.97708	4.44444	1.78311	4.22222	1.73944	2.48148	2.0638	14	1	0	4.57143	1.94992	4.92857	1.73046	4.07143	1.68543	2.14286	1.9945	13	1.15385	0.375534	4	2.04124	3.92308	1.75412	4.38462	1.85016	2.84615	2.1543		S	none	blended	SFA	unclassified
1796	phase	faza	27	3.81481	2.09463	1.55556	0.891556	1.55556	0.974022	1.7037	1.20304	1.44444	0.800641	14	3.85714	2.0327	1.85714	1.09945	2	1.1767	2.07143	1.38477	1.71429	0.99449	13	3.76923	2.24179	1.23077	0.438529	1.07692	0.27735	1.30769	0.85485	1.15385	0.375534	1	H	H	H		unclassified
724	figur	figura	27	4.11111	1.88788	1.88889	1.31071	1.88889	1.28103	1.77778	1.36814	1.44444	0.891556	14	4.21429	1.80506	2.07143	1.26881	2.28571	1.32599	2.14286	1.61041	1.57143	0.937614	13	4	2.04124	1.69231	1.37747	1.46154	1.1266	1.38462	0.960769	1.30769	0.85485	1	H	H	H		unclassified
2388	tasse	filiżanka	27	3.55556	1.88788	1.33333	0.620174	1.37037	0.629294	1.25926	0.944319	1.66667	1.38675	14	4.71429	1.38278	1.35714	0.633324	1.5	0.650444	1	0	1.5	1.01905	13	2.30769	1.54837	1.30769	0.630425	1.23077	0.599145	1.53846	1.33012	1.84615	1.72463	1	H	H	H		unclassified
725	film	film	26	4.84615	1.73649	1.5	0.948683	1.80769	1.44275	1.65385	1.38397	1.19231	0.800961	11	4.54545	1.80907	1.54545	1.21356	2	1.61245	1.63636	1.20605	1.36364	1.20605	15	5.06667	1.70992	1.46667	0.743223	1.66667	1.34519	1.66667	1.54303	1.06667	0.258199	1	H	H	H		unclassified
727	filter	filtr	27	2.14815	1.63387	1.51852	1.22067	1.25926	0.594371	1.44444	0.800641	1.37037	0.741524	14	2.57143	2.02729	1.35714	0.928783	1.21429	0.578934	1.42857	0.755929	1.35714	0.744946	13	1.69231	0.947331	1.69231	1.49358	1.30769	0.630425	1.46154	0.877058	1.38462	0.767948	1	H	none	undifferentiated		N
728	finale	finał	26	4.38462	1.76809	1.23077	0.651625	1.65385	1.26309	2.03846	1.50946	1	0	12	4	1.4771	1.16667	0.389249	1.58333	1.1645	2	1.20605	1	0	14	4.71429	1.9779	1.28571	0.82542	1.71429	1.38278	2.07143	1.77436	1	0	1	H	H	H		unclassified
2583	veilchen	fiołkowy	27	4.11111	2.1543	1.07407	0.3849	1.40741	0.971092	1.14815	0.7698	1.25926	0.944319	14	5	2.14834	1	0	1.35714	1.08182	1	0	1	0	13	3.15385	1.77229	1.15385	0.5547	1.46154	0.877058	1.30769	1.1094	1.53846	1.33012	1	H	H	H		unclassified
732	firma	firmowy	27	3.48148	1.86816	1.44444	0.800641	1.25926	0.594371	1.51852	0.802418	1.40741	1.00992	14	3.57143	1.91007	1.64286	0.928783	1.28571	0.61125	1.57143	0.937614	1.07143	0.267261	13	3.38462	1.89466	1.23077	0.599145	1.23077	0.599145	1.46154	0.660225	1.76923	1.36344	1	H	H	H		unclassified
734	flagge	flaga	26	3.84615	2.23951	1.23077	0.710363	1.69231	1.34964	1.26923	1.00231	1.15385	0.543493	12	3.58333	2.15146	1.08333	0.288675	1.33333	0.651339	1.16667	0.389249	1	0	14	4.07143	2.36852	1.35714	0.928783	2	1.7097	1.35714	1.33631	1.28571	0.726273	1	H	none	H		unclassified
735	flamingo	flaming	27	3.03704	2.13904	1.2963	0.724028	1.2963	0.992852	1.2963	1.20304	1.03704	0.19245	14	3	2.35339	1.42857	0.937614	1.42857	1.34246	1.42857	1.60357	1.07143	0.267261	13	3.07692	1.97744	1.15385	0.375534	1.15385	0.375534	1.15385	0.5547	1	0	1	H	none	H		N
747	flöte	flet	26	3.11538	1.96625	1.73077	1.37281	1.84615	1.43366	1.26923	0.961569	1.34615	0.745241	14	3.07143	2.20015	1.28571	0.61125	1.85714	1.65748	1	0	1.14286	0.363137	12	3.16667	1.74946	2.25	1.81534	1.83333	1.19342	1.58333	1.37895	1.58333	0.996205	1	H	none	H		unclassified
745	flirt	flirt	26	4.46154	1.85969	2.03846	1.75455	1.96154	1.75455	2.92308	1.83135	1.84615	1.64176	12	4.83333	1.6967	2.08333	1.78164	2	1.7581	2.75	2.00567	1.66667	1.49747	14	4.14286	1.9945	2	1.79743	1.92857	1.8172	3.07143	1.73046	2	1.79743	1	H	none	H		unclassified
1982	robbe	foka	26	3.76923	1.88271	1.23077	0.58704	1.5	1.06771	1.38462	0.803837	1.5	0.948683	11	3.63636	2.11058	1.09091	0.301511	1.18182	0.603023	1.36364	0.6742	1.81818	1.25045	15	3.86667	1.76743	1.33333	0.723747	1.73333	1.27988	1.4	0.910259	1.26667	0.593617	1	H	H	H		unclassified
763	form	forma	26	2.76923	2.14117	1.80769	1.20064	1.57692	0.986836	1.88462	1.63284	1.42308	1.02657	12	2.66667	2.05971	1.66667	1.07309	1.5	1	1.58333	1.08362	1.33333	0.887625	14	2.85714	2.28228	1.92857	1.32806	1.64286	1.00821	2.14286	1.9945	1.5	1.16024	1	H	none	undifferentiated		unclassified
884	gestaltung	formować	26	2.23077	1.65669	1.88462	1.27521	1.69231	1.22537	2.15385	1.54123	1.65385	1.12933	11	2	1.61245	2	1.41421	2	1.61245	2.18182	1.72152	1.54545	1.21356	15	2.4	1.72378	1.8	1.20712	1.46667	0.833809	2.13333	1.45733	1.73333	1.09978		H	none	undifferentiated		unclassified
1160	klavier	fortepian	27	3.85185	2.14303	1.2963	0.6688	2.14815	1.65724	1.2963	0.724028	1.25926	0.655896	14	5.28571	1.77281	1.42857	0.755929	2.5	1.9115	1.35714	0.633324	1.28571	0.468807	13	2.30769	1.25064	1.15385	0.5547	1.76923	1.30089	1.23077	0.83205	1.23077	0.83205	1	H	none	H		unclassified
768	fortuna	fortuna	26	5	1.9799	1.65385	1.29437	1.53846	1.02882	2.11538	1.81828	1.26923	0.827415	11	4.90909	1.92117	1.90909	1.6404	1.72727	1.27208	2.90909	2.34327	1.45455	1.21356	15	5.06667	2.08624	1.46667	0.99043	1.4	0.828079	1.53333	1.0601	1.13333	0.351866	1	H	H	H		unclassified
2173	sessel	fotel	26	4.26923	2.01112	1.38462	1.29852	1.5	1.17473	1.61538	1.49872	1.19231	0.633671	12	4.41667	2.02073	1.33333	0.887625	1.33333	0.887625	1.83333	1.85047	1.33333	0.887625	14	4.14286	2.0702	1.42857	1.60357	1.64286	1.39268	1.42857	1.15787	1.07143	0.267261	1	H	H	H		unclassified
769	foto	fotografować	27	4.92593	1.97924	1.37037	0.83887	1.22222	0.50637	1.37037	0.687702	1.14815	0.362014	14	5	1.83973	1.07143	0.267261	1.21429	0.578934	1.42857	0.851631	1	0	13	4.84615	2.19265	1.69231	1.1094	1.23077	0.438529	1.30769	0.480384	1.30769	0.480384	1	H	H	H		H
773	fraktion	frakcja	27	1.77778	1.08604	1.81481	1.35978	1.44444	0.847319	1.88889	1.25064	1.88889	1.62512	14	1.78571	1.25137	1.64286	1.15073	1.21429	0.578934	1.57143	1.01635	1.57143	1.28388	13	1.76923	0.926809	2	1.58114	1.69231	1.03155	2.23077	1.42325	2.23077	1.92154	1	none	none	undifferentiated		N
794	front	front	27	1.96296	1.53125	2.7037	1.89767	2.81481	2.18451	3.55556	2.40725	2.25926	2.1048	14	1.71429	1.13873	2.71429	2.05421	2.71429	2.39963	3.64286	2.67775	2.57143	2.47182	13	2.23077	1.87767	2.69231	1.79743	2.92308	2.01914	3.46154	2.18386	1.92308	1.65638	1	F	none	undifferentiated		unclassified
791	frisur	fryzura	27	3.59259	1.92672	1.88889	1.01274	1.37037	0.629294	1.59259	0.843949	1.48148	0.752962	14	4.21429	1.84718	2.07143	0.916875	1.57143	0.755929	2	0.877058	1.5	0.759555	13	2.92308	1.84669	1.69231	1.1094	1.15385	0.375534	1.15385	0.5547	1.46154	0.77625	1	H	none	H		unclassified
805	funktionär	funkcjonariusz	27	2.14815	1.40613	2.7037	1.6128	1.62963	1.14852	3.48148	1.67264	2.33333	1.61722	14	2	1.6641	2.71429	1.89852	1.78571	1.47693	3.57143	1.74154	2.42857	1.91007	13	2.30769	1.1094	2.69231	1.31559	1.46154	0.660225	3.38462	1.66024	2.23077	1.30089		F	none	undifferentiated		F
1774	pelz	futro	26	2.15385	1.48842	1.84615	1.61722	2.07692	1.44009	1.61538	1.41639	2.30769	1.84974	12	2.41667	1.78164	2.25	1.91288	2.25	1.65831	1.83333	1.74946	2.58333	2.2747	14	1.92857	1.20667	1.5	1.28602	1.92857	1.26881	1.42857	1.08941	2.07143	1.43925	1	D	none	undifferentiated		unclassified
808	fusion	fuzja	27	2.59259	1.75979	1.74074	1.22765	1.55556	0.891556	2.33333	1.81871	1.44444	0.9337	14	2.5	1.6525	1.5	1.09193	1.35714	0.744946	2.5	2.10311	1.5	1.16024	13	2.69231	1.93152	2	1.35401	1.76923	1.01274	2.15385	1.51911	1.38462	0.650444	1	H	none	undifferentiated		unclassified
2887	zunge	gadać	26	3.42308	1.87985	3.42308	1.87985	2.03846	1.37057	2.19231	1.62528	2.26923	1.56353	12	3.41667	2.06522	4	1.90693	2.08333	1.44338	2.25	1.71226	2.75	2.00567	14	3.42857	1.78516	2.92857	1.77436	2	1.35873	2.14286	1.61041	1.85714	0.949262	1	none	none	blended	HA	unclassified
871	gerede	gadanina	26	1.88462	1.47856	3.53846	1.60576	2.11538	1.75104	1.80769	1.64971	2.57692	2.02333	11	2.45455	1.91644	3.81818	1.60114	2	1.41421	1.63636	1.20605	2.63636	1.85864	15	1.46667	0.915475	3.33333	1.63299	2.2	2.00713	1.93333	1.94447	2.53333	2.19957	1	A	none	undifferentiated		A
537	echse	gadzi	26	1.92308	1.38342	1.84615	1.31734	1.65385	1.19808	2.61538	1.96116	2.96154	2.00959	14	1.57143	1.15787	1.92857	1.54244	1.64286	1.49908	2.57143	2.47182	3	2.41788	12	2.33333	1.557	1.75	1.05529	1.66667	0.778499	2.66667	1.23091	2.91667	1.50504	1	D	none	undifferentiated		unclassified
2369	tadeln	ganić	26	1.65385	1.09334	3.57692	1.87985	3.23077	1.83973	3.53846	2.00461	2.19231	1.3862	14	1.35714	0.928783	3.5	1.99036	2.85714	2.0702	3.42857	2.20887	2	1.4676	12	2	1.20605	3.66667	1.82574	3.66667	1.49747	3.66667	1.82574	2.41667	1.31137		A	none	undifferentiated		unclassified
1129	kehle	gardło	26	1.5	1.27279	2	1.89737	1.84615	1.73649	2.46154	2.02447	1.96154	1.24838	12	1.41667	0.996205	1.83333	1.33712	2	1.70561	2.5	1.93061	2.08333	1.37895	14	1.57143	1.50457	2.14286	2.31574	1.71429	1.81568	2.42857	2.17377	1.85714	1.16732	1	F	none	undifferentiated		unclassified
939	gurgel	gardziel	26	1.23077	0.710363	1.96154	1.34107	1.53846	0.811456	2.46154	1.72582	3.19231	2.3155	13	1.23077	0.83205	1.76923	1.30089	1.38462	0.50637	2.84615	2.1543	3.30769	2.56205	13	1.23077	0.599145	2.15385	1.40512	1.69231	1.03155	2.07692	1.11516	3.07692	2.13937	1	D	none	undifferentiated		D
1824	plaudern	gawędzić	26	4.11538	1.79615	1.30769	0.617688	1.23077	0.58704	1.23077	0.651625	1.23077	0.58704	12	3.66667	1.557	1.41667	0.668558	1.33333	0.651339	1.33333	0.778499	1.41667	0.792961	14	4.5	1.95133	1.21429	0.578934	1.14286	0.534522	1.14286	0.534522	1.07143	0.267261		H	H	H		unclassified
817	gas	gaz	26	1.92308	1.87453	2.30769	1.78369	2.26923	1.56353	3.92308	1.67148	2.73077	2.08917	14	1	0	1.85714	1.74784	2.28571	1.81568	4	1.61722	2.42857	2.06488	12	3	2.3741	2.83333	1.74946	2.25	1.28806	3.83333	1.80067	3.08333	2.15146		F	none	undifferentiated		F
2847	zeitung	gazeta	26	2.61538	1.85638	1.92308	1.52113	1.30769	0.788377	1.38462	0.803837	1.30769	0.679366	12	2.83333	2.12489	1.16667	0.57735	1	0	1.08333	0.288675	1	0	14	2.42857	1.65084	2.57143	1.78516	1.57143	1.01635	1.64286	1.00821	1.57143	0.851631	1	H	none	undifferentiated		N
2138	schwamm	gąbka	26	2.5	1.58114	1.03846	0.196116	1.03846	0.196116	1	0	1.23077	0.514408	12	2.08333	1.31137	1.08333	0.288675	1	0	1	0	1.33333	0.651339	14	2.85714	1.74784	1	0	1.07143	0.267261	1	0	1.14286	0.363137	1	H	none	H		N
1916	raupe	gąsienica	27	2.74074	1.89316	1.74074	1.28879	1.88889	1.60128	2.03704	1.48016	2.2963	1.68283	14	3.5	2.13937	2.07143	1.38477	2.28571	1.89852	2.64286	1.64584	2.85714	1.9945	13	1.92308	1.18754	1.38462	1.1209	1.46154	1.1266	1.38462	0.960769	1.69231	1.03155	1	H	none	undifferentiated		unclassified
866	general	generał	27	2.25926	1.45688	1.85185	1.02671	1.77778	1.25064	2.59259	1.69296	1.74074	1.12976	14	2.64286	1.49908	2.14286	1.02711	2.21429	1.42389	2.85714	1.40642	2	1.1094	13	1.84615	1.3445	1.53846	0.967418	1.30769	0.85485	2.30769	1.97419	1.46154	1.1266	1	F	none	undifferentiated		unclassified
867	genial	genialny	26	5.42308	1.62906	1.65385	1.52164	1.42308	0.986836	1.57692	1.13747	1.19231	0.567044	13	5.46154	1.71345	1.53846	1.6641	1.30769	1.1094	1.76923	1.42325	1.23077	0.599145	13	5.38462	1.60927	1.76923	1.42325	1.53846	0.877058	1.38462	0.767948	1.15385	0.5547		H	H	H		H
868	genie	geniusz	26	5.15385	1.40548	1.92308	1.67148	1.92308	1.59808	2	1.74356	1.42308	1.27037	11	5.54545	1.36848	1.54545	1.29334	1.54545	0.8202	1.81818	1.77866	1.09091	0.301511	15	4.86667	1.40746	2.2	1.89737	2.2	1.97122	2.13333	1.76743	1.66667	1.63299	1	H	H	H		unclassified
886	geste	gest	26	4.07692	1.52113	1.61538	1.29852	1.34615	0.79711	1.76923	1.39449	1.61538	1.29852	14	4.14286	1.61041	1.28571	0.61125	1.07143	0.267261	1.71429	1.13873	1.42857	1.08941	12	4	1.4771	2	1.7581	1.66667	1.07309	1.83333	1.6967	1.83333	1.52753	1	H	H	H		unclassified
897	ghetto	getto	26	1.15385	0.784465	5.19231	2.00038	5.61538	1.81278	5.23077	1.86135	5	2.29783	12	1	0	5.16667	1.85047	5.5	1.88294	5.16667	1.6967	5	2.5937	14	1.28571	1.06904	5.21429	2.19014	5.71429	1.81568	5.28571	2.05421	5	2.11224	1	S	none	undifferentiated		unclassified
814	gans	gęś	26	2.03846	1.66086	1.07692	0.271746	1.23077	0.815239	1.61538	1.0612	1.5	0.948683	12	1.91667	1.37895	1.16667	0.389249	1.16667	0.389249	1.91667	1.37895	1.66667	1.07309	14	2.14286	1.91581	1	0	1.28571	1.06904	1.35714	0.633324	1.35714	0.841897	1	H	none	undifferentiated		N
418	börse	giełda	26	3.15385	1.84808	2.61538	1.81278	1.84615	1.34736	3	2.17256	1.88462	1.47856	11	2.90909	1.7581	3	2.23607	2.27273	1.61808	3.45455	2.38175	1.54545	0.934199	15	3.33333	1.9518	2.33333	1.44749	1.53333	1.0601	2.66667	2.02367	2.13333	1.76743	1	H	none	undifferentiated		unclassified
902	gigant	gigantyczny	26	2.61538	1.79057	1.69231	1.49048	1.30769	0.735893	2.23077	1.21021	1.42308	0.945434	12	2.83333	1.6967	1.5	1	1.33333	0.651339	2.16667	0.937437	1.41667	0.996205	14	2.42857	1.91007	1.85714	1.83375	1.28571	0.82542	2.28571	1.43734	1.42857	0.937614	1	H	none	undifferentiated		unclassified
904	girlande	girlanda	26	2.73077	1.61388	1.34615	0.891843	1.42308	0.945434	1.42308	1.02657	1.38462	0.982931	12	3.33333	1.87487	1.08333	0.288675	1.25	0.621582	1.08333	0.288675	1.08333	0.288675	14	2.21429	1.18831	1.57143	1.15787	1.57143	1.15787	1.71429	1.32599	1.64286	1.27745	1	H	none	H		N
905	gitarre	gitara	26	5.19231	1.83345	1.76923	1.47804	2.03846	1.86506	1.73077	1.51149	1.30769	1.19228	13	5.30769	1.88788	1.61538	1.66024	2.61538	2.36426	1.53846	1.6641	1.53846	1.6641	13	5.07692	1.84669	1.92308	1.32045	1.46154	0.967418	1.92308	1.38212	1.07692	0.27735	1	H	H	H		unclassified
409	boden	gleba	26	1.73077	1.45761	1.88462	1.39505	1.5	0.948683	1.92308	1.52113	1.57692	1.23849	12	1.66667	1.49747	1.66667	1.37069	1.33333	0.887625	1.58333	1.37895	1.33333	0.887625	14	1.78571	1.47693	2.07143	1.43925	1.64286	1.00821	2.21429	1.62569	1.78571	1.47693	1	F	none	undifferentiated		N
911	globus	globus	27	3.22222	2.25889	1.14815	0.456045	1.07407	0.26688	1.44444	1.01274	1.03704	0.19245	14	2.42857	2.13809	1.14286	0.363137	1.07143	0.267261	1.64286	1.15073	1	0	13	4.07692	2.13937	1.15385	0.5547	1.07692	0.27735	1.23077	0.83205	1.07692	0.27735	1	H	none	H		unclassified
1143	kiesel	głaz	26	1.92308	1.52113	1.53846	1.1395	1.96154	1.53573	2.23077	1.42289	1.30769	0.617688	14	1.35714	0.744946	1.28571	0.61125	1.85714	1.61041	2.35714	1.59842	1.14286	0.363137	12	2.58333	1.92865	1.83333	1.52753	2.08333	1.50504	2.08333	1.24011	1.5	0.797724	1	F	none	undifferentiated		unclassified
2422	tiefe	głęboki	26	3.15385	1.80427	1.61538	1.23538	1.76923	1.06987	3.11538	1.88312	1.53846	1.06699	14	2.5	1.74312	1.64286	1.39268	1.5	0.85485	3.92857	1.89997	1.5	1.16024	12	3.91667	1.62135	1.58333	1.08362	2.08333	1.24011	2.16667	1.40346	1.58333	0.996205	1	H	none	blended	HF	F
1041	hunger	głodny	27	1.2963	0.541708	4.25926	1.95316	3.77778	2.06311	2.88889	1.9282	1.85185	1.72546	14	1.21429	0.425815	4.35714	2.02322	3.57143	2.31099	2.92857	1.85904	1.92857	1.85904	13	1.38462	0.650444	4.15385	1.95133	4	1.82574	2.84615	2.0755	1.76923	1.64083	1	A	none	undifferentiated		A
1286	laut	głośny	27	3.11111	1.5525	3.77778	1.50214	1.51852	0.975483	2.25926	2.0304	1.96296	1.67519	14	2.85714	1.51186	3.78571	1.62569	1.57143	1.01635	2.42857	2.24343	2.14286	2.10703	13	3.38462	1.60927	3.76923	1.42325	1.46154	0.967418	2.07692	1.84669	1.76923	1.09193		A	none	undifferentiated		A
2394	taub	głuchy	27	1.37037	0.83887	2.62963	1.82184	3.59259	1.78151	3.33333	1.86052	2.25926	1.85208	14	1.42857	0.851631	2.92857	1.97929	3.78571	1.80506	3.28571	1.89852	2.42857	2.24343	13	1.30769	0.85485	2.30769	1.6525	3.38462	1.80455	3.38462	1.89466	2.07692	1.38212		S	none	undifferentiated		unclassified
79	albern	głupi	26	1.80769	1.76679	3.57692	1.77027	3.30769	1.80597	2.73077	1.73338	2.65385	1.71912	15	1.4	1.12122	4.06667	1.75119	3.66667	1.83874	2.93333	1.57963	3.06667	1.86956	11	2.36364	2.3355	2.90909	1.6404	2.81818	1.72152	2.45455	1.96792	2.09091	1.3751		A	none	undifferentiated		unclassified
534	dummheit	głupota	26	1.80769	1.54969	4.03846	1.84349	2.69231	1.31967	2.42308	1.4744	3.19231	1.69751	12	1.58333	1.1645	3.66667	1.30268	2.91667	1.37895	2.83333	1.64225	2.58333	1.37895	14	2	1.83973	4.35714	2.20514	2.5	1.28602	2.07143	1.26881	3.71429	1.81568	1	A	none	undifferentiated		A
1413	lynchen	gnębić	27	1.14815	0.601518	5.37037	1.96406	4.33333	2.11224	4.48148	2.0638	4.55556	2.17208	14	1.07143	0.267261	5.78571	1.71772	5	2	5.64286	1.44686	5.14286	2.10703	13	1.23077	0.83205	4.92308	2.17798	3.61538	2.06311	3.23077	1.92154	3.92308	2.13937		A	none	undifferentiated		unclassified
2669	verwesen	gnić	27	1.22222	0.697982	2.62963	1.59683	2.88889	1.42325	3.33333	1.61722	4.62963	1.71303	14	1.21429	0.801784	2.64286	1.39268	3	1.61722	3.21429	1.76193	4.5	1.95133	13	1.23077	0.599145	2.61538	1.85016	2.76923	1.23517	3.46154	1.5064	4.76923	1.48064		D	none	D		D
2876	zorn	gniew	26	1.5	1.17473	4.92308	2.11515	3.38462	2.2641	3.42308	1.92194	2.5	2.0445	12	1.41667	0.900337	4.33333	2.05971	3.16667	1.99241	3.25	1.71226	2.08333	1.67649	14	1.57143	1.39859	5.42857	2.1018	3.57143	2.53329	3.57143	2.13809	2.85714	2.31574	1	A	none	A		unclassified
2877	zornig	gniewny	26	1.23077	1.1767	4.65385	2.13433	2.69231	1.97523	3.80769	2.09798	2.69231	1.84974	12	1	0	4.58333	2.4293	2.33333	2.14617	4.08333	2.31432	2.5	1.73205	14	1.42857	1.60357	4.71429	1.93862	3	1.83973	3.57143	1.94992	2.85714	1.9945		A	none	undifferentiated		unclassified
1075	jauche	gnojówka	27	1.40741	0.971092	1.7037	1.10296	1.40741	0.888355	1.44444	0.751068	4.25926	2.22905	14	1	0	1.71429	0.913874	1.07143	0.267261	1.21429	0.578934	4.35714	2.20514	13	1.84615	1.28103	1.69231	1.31559	1.76923	1.16575	1.69231	0.85485	4.15385	2.33973	1	D	D	D		D
2348	stunde	godzina	26	2.23077	1.45073	2.15385	1.48842	1.92308	1.54721	2.73077	1.95054	1.38462	0.697247	15	1.8	1.26491	2.33333	1.63299	2.2	1.82052	2.86667	2.09989	1.46667	0.743223	11	2.81818	1.53741	1.90909	1.30035	1.54545	1.03573	2.54545	1.80907	1.27273	0.64667	1	F	none	undifferentiated		unclassified
2474	treffer	gol	27	5.25926	1.93336	1.7037	1.03086	1.96296	1.58069	1.40741	0.747265	1.25926	0.984206	14	5.21429	1.71772	1.85714	1.02711	2.21429	1.47693	1.42857	0.646206	1.07143	0.267261	13	5.30769	2.21302	1.53846	1.05003	1.69231	1.70219	1.38462	0.869718	1.46154	1.39137	1	H	H	H		unclassified
1904	rasierer	golarka	26	1.73077	1.25085	2.07692	1.64738	1.61538	1.20256	1.69231	1.04954	2.11538	1.81828	12	1.58333	1.37895	1.83333	1.64225	1.25	0.621582	1.66667	1.07309	2.25	1.95982	14	1.85714	1.16732	2.28571	1.68379	1.92857	1.49174	1.71429	1.06904	2	1.75412	1	D	none	undifferentiated		N
2395	taube	gołąb	26	2.61538	1.85638	1.73077	1.04145	1.26923	0.533494	1.46154	0.904689	2.42308	1.77027	12	2.83333	2.03753	1.58333	0.792961	1.33333	0.492366	1.75	1.13818	2.16667	1.6967	14	2.42857	1.74154	1.85714	1.23146	1.21429	0.578934	1.21429	0.578934	2.64286	1.86495	1	H	none	undifferentiated		D
723	fieber	gorączka	27	1.25926	0.859006	3.44444	2.18972	3.62963	1.90441	2.74074	1.89316	2.44444	1.8674	14	1	0	3.57143	2.17377	3.85714	1.65748	3.07143	1.97929	2.35714	1.33631	13	1.53846	1.19829	3.30769	2.28709	3.38462	2.18092	2.38462	1.80455	2.53846	2.36697	1	S	none	undifferentiated		unclassified
395	bitter	gorzki	26	1.57692	1.10175	2.19231	1.35703	3.07692	1.83135	2.26923	1.66271	3.38462	1.98145	15	1.53333	0.833809	2.13333	1.0601	3.06667	1.70992	2.06667	1.57963	3.53333	2.03072	11	1.63636	1.43337	2.27273	1.73729	3.09091	2.07145	2.54545	1.80907	3.18182	1.99089		D	none	undifferentiated		D
969	haushalt	gospodarstwo	26	2.96154	1.84349	1.84615	1.64176	1.84615	1.7133	2.15385	1.86959	1.92308	1.59808	12	2.83333	1.80067	1.83333	1.58592	1.75	1.86474	2.08333	2.06522	2.08333	1.92865	14	3.07143	1.94004	1.85714	1.74784	1.92857	1.63915	2.21429	1.76193	1.78571	1.3114	1	H	none	undifferentiated		unclassified
968	hausfrau	gosposia	27	3.11111	1.47631	1.92593	1.43918	1.77778	1.28103	1.66667	1.20894	1.59259	1.21716	14	3.5	1.45444	2.35714	1.69193	2.21429	1.47693	2.07143	1.54244	1.85714	1.51186	13	2.69231	1.4367	1.46154	0.967418	1.30769	0.85485	1.23077	0.438529	1.30769	0.751068	1	H	none	H		unclassified
818	gast	gość	26	4.38462	1.60192	1.76923	1.24283	1.5	0.989949	2.30769	1.4634	1.65385	1.16421	13	4.84615	1.3445	1.69231	0.947331	1.61538	1.1209	2.69231	1.79743	1.84615	1.3445	13	3.92308	1.75412	1.84615	1.51911	1.38462	0.869718	1.92308	0.954074	1.46154	0.967418	1	H	H	H		unclassified
257	bargeld	gotówka	27	5.2963	1.95753	1.48148	0.975483	1.59259	1.04731	1.85185	1.32153	1.22222	0.640513	14	4.71429	2.36736	1.71429	1.20439	1.85714	1.29241	2.21429	1.57766	1.35714	0.841897	13	5.92308	1.18754	1.23077	0.599145	1.30769	0.630425	1.46154	0.877058	1.07692	0.27735	1	H	H	H		unclassified
1668	nelke	goździk	26	3.69231	1.95488	1.15385	0.612686	1.5	0.860233	1.19231	0.633671	1.15385	0.612686	12	3.83333	1.94625	1.08333	0.288675	1.58333	0.792961	1.16667	0.389249	1.08333	0.288675	14	3.57143	2.02729	1.21429	0.801784	1.42857	0.937614	1.21429	0.801784	1.21429	0.801784	1	H	H	H		unclassified
1545	mist	gówno	27	1.48148	0.975483	3.33333	2.18386	2.11111	2.02548	1.96296	1.95097	5.33333	2.0755	14	1	0	3.28571	2.36736	2.28571	2.1989	2	2.18386	5.21429	2.39161	13	2	1.22474	3.38462	2.06311	1.92308	1.89128	1.92308	1.75412	5.46154	1.76141	1	D	none	D		D
2253	spiel	gra	26	4.57692	1.79272	2.23077	1.53121	1.42308	0.808608	2.26923	1.56353	1.34615	0.845804	11	3.90909	1.70027	2.72727	1.73729	1.36364	0.6742	2.72727	1.79393	1.36364	0.924416	15	5.06667	1.75119	1.86667	1.30201	1.46667	0.915475	1.93333	1.33452	1.33333	0.816497	1	H	H	H		unclassified
1921	rechen	grabie	26	1.88462	1.45126	1.26923	0.724303	1.30769	0.735893	1.46154	0.760567	1.30769	0.679366	12	2.08333	1.67649	1.33333	0.887625	1.25	0.452267	1.33333	0.651339	1.25	0.621582	14	1.71429	1.26665	1.21429	0.578934	1.35714	0.928783	1.57143	0.851631	1.35714	0.744946	1	H	none	undifferentiated		N
205	auftreten	grać	27	4.51852	1.80534	2.03704	1.34397	1.44444	0.9337	1.81481	1.21012	1.48148	1.12217	14	4.28571	1.81568	1.78571	1.18831	1.21429	0.801784	1.64286	1.00821	1.21429	0.578934	13	4.76923	1.83275	2.30769	1.49358	1.69231	1.03155	2	1.41421	1.76923	1.48064		H	H	H		unclassified
949	hagel	grad	27	1.81481	1.2721	2.11111	1.62512	2.22222	1.84669	2.59259	1.84514	1.55556	1.50214	14	2.14286	1.56191	2.71429	1.9779	2.78571	2.22498	3	2	1.85714	1.9945	13	1.46154	0.77625	1.46154	0.77625	1.61538	1.1209	2.15385	1.62512	1.23077	0.599145	1	F	none	undifferentiated		unclassified
1607	musikbox	gramofon	27	4.18519	1.88184	1.25926	0.984206	1.37037	0.687702	1.03704	0.19245	1	0	14	4.07143	1.94004	1.14286	0.363137	1.35714	0.633324	1	0	1	0	13	4.30769	1.88788	1.38462	1.38675	1.38462	0.767948	1.07692	0.27735	1	0	1	H	H	H		unclassified
919	granate	granat	26	1.69231	1.59422	3.03846	1.77721	2.65385	2.22607	4.30769	2.14978	2.61538	2.11805	12	1.75	1.76455	3.75	1.54479	2.75	2.00567	4.5	1.73205	2.5	2.0226	14	1.64286	1.49908	2.42857	1.78516	2.57143	2.47182	4.14286	2.50713	2.71429	2.26779	1	F	none	undifferentiated		unclassified
925	grenze	granica	26	2.46154	1.58065	2.69231	1.69161	3.19231	2.09798	3.53846	1.88108	2.11538	1.72805	15	2.33333	1.34519	2.46667	1.40746	2.6	1.59463	3.86667	1.72654	1.8	1.47358	11	2.63636	1.91169	3	2.04939	4	2.48998	3.09091	2.07145	2.54545	2.0181	1	F	none	undifferentiated		unclassified
922	gratis	gratisowy	26	4.46154	1.92314	1.80769	1.20064	1.30769	0.735893	1.61538	0.897861	1.61538	1.32897	14	3.85714	2.0327	1.71429	1.06904	1.14286	0.363137	1.5	0.85485	1.57143	1.39859	12	5.16667	1.58592	1.91667	1.37895	1.5	1	1.75	0.965307	1.66667	1.30268		H	H	H		unclassified
610	erbse	groch	27	1.62963	1.00568	1.7037	1.58878	1.51852	1.01414	1.62963	1.14852	1.92593	1.73041	14	1.92857	1.26881	1.78571	1.67233	1.57143	1.08941	1.64286	1.15073	2.5	2.13937	13	1.30769	0.480384	1.61538	1.55662	1.46154	0.967418	1.61538	1.19293	1.30769	0.85485	1	D	none	undifferentiated		N
1996	rudel	gromadny	27	3	1.61722	1.37037	0.741524	1.18519	0.483341	1.55556	0.847319	1.2963	0.608581	14	3.21429	1.96815	1.35714	0.633324	1.14286	0.363137	1.64286	1.00821	1.07143	0.267261	13	2.76923	1.16575	1.38462	0.869718	1.23077	0.599145	1.46154	0.660225	1.53846	0.77625	1	H	none	H		N
2281	stapeln	gromadzić	26	3.34615	1.87494	1.84615	1.28662	2.03846	1.50946	1.61538	1.38786	1.65385	1.49512	14	2.71429	1.93862	1.92857	1.54244	2.28571	1.85757	1.85714	1.83375	1.92857	1.97929	12	4.08333	1.56428	1.75	0.965307	1.75	0.965307	1.33333	0.492366	1.33333	0.492366		H	none	H		unclassified
527	drohen	grozić	26	1.11538	0.431455	4.65385	1.59856	3.15385	2.12964	4.76923	1.7276	3.65385	2.41565	12	1	0	5.25	1.60255	3.33333	2.46183	5.08333	1.72986	3.58333	2.39159	14	1.21429	0.578934	4.14286	1.46009	3	1.88108	4.5	1.74312	3.71429	2.5246		F	none	undifferentiated		unclassified
528	drohung	groźba	26	1.15385	0.464095	4.30769	2.05464	3.65385	2.27934	5.23077	2.00614	3.26923	2.49091	11	1	0	4.90909	2.11918	4.36364	2.24823	6.45455	0.934199	3.63636	2.61812	15	1.26667	0.593617	3.86667	1.95911	3.13333	2.2318	4.33333	2.12692	3	2.44949	1	F	none	undifferentiated		unclassified
918	grab	grób	26	1.23077	0.651625	3.11538	2.23297	5.61538	1.55118	4.65385	1.97873	2.80769	1.85514	14	1.42857	0.851631	2.92857	2.1649	5.92857	1.49174	4.71429	2.12779	2.14286	1.56191	12	1	0	3.33333	2.38683	5.25	1.60255	4.58333	1.88092	3.58333	1.92865	1	S	none	blended	SF	unclassified
450	burg	gród	26	3.11538	2.08474	1.26923	0.874423	1.5	1.17473	1.65385	1.23101	1.19231	0.633671	14	2.57143	2.06488	1.07143	0.267261	1.21429	0.578934	1.5	1.09193	1.07143	0.267261	12	3.75	2.00567	1.5	1.24316	1.83333	1.58592	1.83333	1.40346	1.33333	0.887625	1	H	none	H		unclassified
935	gruppe	grupowy	27	3.2963	1.5396	1.85185	1.48593	1.77778	1.52753	2.2963	1.63648	1.85185	1.45981	14	3.14286	1.09945	2.35714	1.64584	2.21429	1.76193	2.85714	1.87523	2.35714	1.7368	13	3.46154	1.94145	1.30769	1.1094	1.30769	1.1094	1.69231	1.1094	1.30769	0.85485	1	H	none	undifferentiated		unclassified
391	birne	gruszkowy	26	3.88462	2.16013	1.34615	0.977438	1.23077	0.710363	1.23077	0.710363	1.30769	0.788377	12	4.5	2.27636	1.16667	0.389249	1.08333	0.288675	1.33333	0.887625	1.08333	0.288675	14	3.35714	1.98483	1.5	1.28602	1.35714	0.928783	1.14286	0.534522	1.5	1.01905	1	H	H	H		unclassified
2132	schutt	gruz	27	1.74074	1.48305	2.07407	1.59147	2.44444	2.02548	2	1.73205	1.96296	1.698	14	2.14286	1.91581	2.57143	1.78516	3.21429	2.42356	2.57143	2.17377	2.21429	1.71772	13	1.30769	0.630425	1.53846	1.19829	1.61538	1.04391	1.38462	0.767948	1.69231	1.70219	1	S	none	undifferentiated		unclassified
1097	kamm	grzebień	26	2.30769	1.84974	1.65385	1.38397	1.38462	1.23538	1.42308	1.23849	1.73077	1.45761	12	2.25	1.71226	1.5	1	1.16667	0.389249	1.33333	0.651339	1.5	1	14	2.35714	2.02322	1.78571	1.67233	1.57143	1.65084	1.5	1.60528	1.92857	1.77436	1	H	none	undifferentiated		N
516	donner	grzmot	26	2.46154	1.94383	1.73077	1.00231	1.53846	1.02882	3.15385	1.75937	1.53846	1.20767	12	2.16667	1.80067	1.75	1.05529	1.5	1.24316	3.58333	2.02073	1.66667	1.37069	14	2.71429	2.09132	1.71429	0.99449	1.57143	0.851631	2.78571	1.47693	1.42857	1.08941	1	F	none	undifferentiated		F
1802	pilz	grzybowy	26	3.73077	1.71015	1.5	1.17473	1.19231	0.567044	1.53846	1.1395	1.76923	1.42289	13	3.61538	1.85016	1.46154	1.39137	1.07692	0.27735	1.61538	1.19293	1.76923	1.64083	13	3.84615	1.62512	1.53846	0.967418	1.30769	0.751068	1.46154	1.1266	1.76923	1.23517	1	H	H	H		unclassified
938	gummi	gumowy	27	2.03704	1.42725	1.44444	1.05003	1.33333	0.784465	1.51852	1.12217	1.59259	1.00992	14	2.5	1.69842	1.57143	1.01635	1.42857	0.755929	1.71429	1.13873	1.71429	1.06904	13	1.53846	0.877058	1.30769	1.1094	1.23077	0.83205	1.30769	1.1094	1.46154	0.967418	1	H	none	undifferentiated		N
365	beule	guz	27	1.14815	0.456045	3.66667	2.11224	4.7037	1.68283	4.66667	2.14834	3.7037	2.23288	14	1.28571	0.61125	4.42857	2.20887	5.42857	1.39859	5.35714	1.86495	4.71429	1.9779	13	1	0	2.84615	1.72463	3.92308	1.65638	3.92308	2.2532	2.61538	2.02231	1	S	none	undifferentiated		unclassified
2582	vehemenz	gwałtowny	27	1.66667	0.960769	3.11111	1.73944	2.25926	1.72298	3.33333	1.96116	2.37037	2.05965	14	2	1.03775	4.07143	1.32806	3.21429	1.92867	4.42857	1.60357	3.42857	2.37663	13	1.30769	0.751068	2.07692	1.5525	1.23077	0.438529	2.15385	1.62512	1.23077	0.599145	1	F	none	undifferentiated		unclassified
2310	stern	gwiazda	26	4.69231	1.93431	1.53846	1.24035	1.61538	1.26734	1.61538	1.09825	1.26923	0.603834	12	5.08333	1.62135	1	0	1.66667	1.23091	1.08333	0.288675	1	0	14	4.35714	2.16997	2	1.56893	1.57143	1.34246	2.07143	1.32806	1.5	0.759555	1	H	H	H		unclassified
953	halle	hala	26	2.76923	2.10348	1.19231	0.491466	1.30769	0.549125	2.07692	1.3542	1.46154	1.1395	12	2.33333	2.18812	1.16667	0.57735	1.25	0.621582	2.16667	1.33712	1.33333	0.778499	14	3.14286	2.0327	1.21429	0.425815	1.35714	0.497245	2	1.41421	1.57143	1.39859	1	H	none	undifferentiated		unclassified
2003	ruhmlos	haniebny	26	1.26923	0.724303	3.65385	1.8098	2.92308	1.71868	2.23077	1.70429	4.19231	1.98029	12	1.33333	0.887625	3.5	1.5667	2.66667	1.30268	2.08333	1.1645	3.83333	1.64225	14	1.21429	0.578934	3.78571	2.04483	3.14286	2.0327	2.35714	2.09788	4.5	2.24465		D	none	undifferentiated		unclassified
2052	schande	hańbić	27	1.33333	0.960769	4.33333	1.86052	3.55556	2.04438	3.25926	2.08645	3.81481	2.09463	14	1.35714	1.08182	5.14286	1.61041	4.5	1.9115	4.14286	2.28228	4.64286	2.09788	13	1.30769	0.85485	3.46154	1.76141	2.53846	1.71345	2.30769	1.37747	2.92308	1.75412	1	A	none	undifferentiated		unclassified
962	harfe	harfa	27	4.22222	2.17208	1.14815	0.456045	1.62963	1.24493	1.07407	0.3849	1.07407	0.3849	14	4.57143	2.50275	1.14286	0.363137	1.57143	1.39859	1	0	1	0	13	3.84615	1.77229	1.15385	0.5547	1.69231	1.1094	1.15385	0.5547	1.15385	0.5547	1	H	H	H		unclassified
963	harmonie	harmonia	26	5.65385	1.44062	1.42308	1.06482	1.38462	0.803837	1.23077	0.710363	1.26923	1.00231	14	5.71429	1.72888	1.14286	0.363137	1.14286	0.363137	1	0	1.07143	0.267261	12	5.58333	1.08362	1.75	1.48477	1.66667	1.07309	1.5	1	1.5	1.446	1	H	H	H		H
2125	schuften	harować	26	1.88462	1.58308	4.26923	2.06993	3.30769	2.36253	3.46154	2.31915	3.11538	2.30351	11	1.54545	1.21356	4.36364	2.01359	3.45455	2.29624	3.36364	2.41962	3.27273	2.53341	15	2.13333	1.80739	4.2	2.17781	3.2	2.48424	3.53333	2.32584	3	2.20389		A	none	undifferentiated		unclassified
1390	losung	hasło	27	2.40741	1.5995	2	1.49358	1.22222	0.640513	2.22222	1.33973	1.40741	1.21716	14	2.57143	1.55486	1.42857	0.937614	1.14286	0.363137	1.71429	1.13873	1.07143	0.267261	13	2.23077	1.69085	2.61538	1.75777	1.30769	0.85485	2.76923	1.36344	1.76923	1.69085	1	H	none	undifferentiated		unclassified
2210	skat	hazard	27	2.2963	1.70553	3.81481	2.13104	3.11111	2.08167	4.55556	2.04438	3.51852	2.22521	14	2.21429	1.62569	4	2.2532	3.5	2.02864	4.71429	2.05421	3.42857	2.50275	13	2.38462	1.85016	3.61538	2.06311	2.69231	2.13638	4.38462	2.10311	3.61538	1.98068	1	F	none	undifferentiated		unclassified
1018	hobel	hebel	27	1.7037	1.40917	1.74074	1.31829	1.44444	1.08604	1.48148	1.25178	1.33333	0.620174	14	1.92857	1.73046	2	1.4676	1.21429	0.801784	1.85714	1.65748	1.28571	0.61125	13	1.46154	0.967418	1.46154	1.1266	1.69231	1.31559	1.07692	0.27735	1.38462	0.650444	1	A	none	undifferentiated		N
1139	ketzer	heretyk	26	1.80769	1.67378	2.84615	2.09174	2.38462	1.81278	2.69231	2.22296	2.42308	1.94264	11	1.36364	1.20605	2.72727	2.24013	2.72727	2.05382	3	2.48998	2.18182	1.53741	15	2.13333	1.9223	2.93333	2.05171	2.13333	1.64172	2.46667	2.06559	2.6	2.22967	1	A	none	undifferentiated		unclassified
1069	irrlehre	herezja	26	1.23077	0.992278	4.03846	1.94896	3.57692	1.92194	3.30769	2.09321	3.53846	2.10201	12	1.08333	0.288675	4.41667	1.62135	2.91667	1.72986	3.66667	2.18812	4.58333	1.88092	14	1.35714	1.33631	3.71429	2.1989	4.14286	1.95555	3	2.0381	2.64286	1.90575	1	A	none	undifferentiated		unclassified
996	heroisch	heroiczny	26	3.80769	1.91873	1.42308	0.757526	2.11538	1.63284	2.19231	1.23351	1.46154	1.27219	12	3.83333	2.03753	1.66667	0.984732	1.91667	1.08362	2.41667	1.08362	1.25	0.621582	14	3.78571	1.88837	1.21429	0.425815	2.28571	2.01642	2	1.35873	1.64286	1.64584		H	none	H		unclassified
1542	mischehe	heteroseksualny	26	3.57692	2.2122	1.53846	1.27219	1.26923	0.827415	1.5	1.2083	1.61538	1.60192	14	3	1.79743	1.64286	1.49908	1.28571	1.06904	1.5	1.28602	1.78571	2.00686	12	4.25	2.52713	1.41667	0.996205	1.25	0.452267	1.5	1.16775	1.41667	0.996205	1	H	none	H		unclassified
1044	hypnose	hipnotyczny	27	2.96296	1.87045	1.48148	0.935224	1.40741	0.930643	2.92593	1.7743	1.2963	0.608581	14	3	1.75412	1.64286	1.15073	1.5	1.16024	2.78571	1.88837	1.28571	0.61125	13	2.92308	2.06	1.30769	0.630425	1.30769	0.630425	3.07692	1.70595	1.30769	0.630425	1	H	none	blended	HF	F
1045	hypothek	hipoteczny	27	1.51852	0.70002	2.25926	1.76706	2.25926	1.7887	2.62963	1.77911	1.96296	1.34397	14	1.5	0.759555	2.57143	2.06488	2.57143	2.02729	3.28571	1.89852	2.21429	1.57766	13	1.53846	0.660225	1.92308	1.38212	1.92308	1.49786	1.92308	1.38212	1.69231	1.03155	1	F	none	undifferentiated		unclassified
877	geschichte	historia	26	3	2.07846	2	1.54919	2.69231	1.80597	2.30769	1.87124	2.15385	1.68979	12	2.91667	2.2747	2.5	1.97714	2.41667	1.83196	2.5	2.23607	2.08333	1.88092	14	3.07143	1.97929	1.57143	0.937614	2.92857	1.8172	2.14286	1.56191	2.21429	1.57766		H	none	undifferentiated		unclassified
1962	renner	hit	26	3.42308	2.17574	1.80769	1.47022	1.53846	1.27219	1.34615	0.977438	1.76923	1.50486	12	3.41667	2.2747	2.16667	1.99241	1.75	1.60255	1.5	1.16775	1.83333	1.85047	14	3.42857	2.17377	1.5	0.759555	1.35714	0.928783	1.21429	0.801784	1.71429	1.20439	1	H	none	H		unclassified
1017	hobby	hobby	27	6.25926	0.984206	1.25926	0.984206	1.14815	0.362014	1.07407	0.26688	1.03704	0.19245	14	6.57143	0.755929	1.07143	0.267261	1.14286	0.363137	1.14286	0.363137	1	0	13	5.92308	1.11516	1.46154	1.39137	1.15385	0.375534	1	0	1.07692	0.27735	1	H	H	H		H
207	aufzucht	hodowla	27	2.48148	1.86816	1.62963	1.21365	1.77778	1.52753	1.74074	1.6075	1.62963	1.41824	14	2.28571	1.81568	1.71429	1.38278	1.78571	1.42389	2	1.92154	1.78571	1.67233	13	2.69231	1.97419	1.53846	1.05003	1.76923	1.69085	1.46154	1.19829	1.46154	1.1266	1	H	none	undifferentiated		unclassified
2247	spenden	hojny	26	4.92308	1.52113	1.34615	0.628796	1.26923	0.603834	1.5	0.761577	1.15385	0.367946	12	4.83333	1.85047	1.41667	0.514929	1.25	0.452267	1.58333	0.792961	1.25	0.452267	14	5	1.24035	1.28571	0.726273	1.28571	0.726273	1.42857	0.755929	1.07143	0.267261		H	H	H		unclassified
1651	nazizeit	holocaust	26	1	0	5.88462	1.65715	5.80769	1.87658	5.76923	1.83973	5.92308	1.64738	12	1	0	6.16667	1.2673	5.83333	1.80067	6.08333	1.72986	6.5	1	14	1	0	5.64286	1.94569	5.78571	2.00686	5.5	1.95133	5.42857	1.94992	1	D	none	undifferentiated		unclassified
1038	hummer	homar	26	2.57692	1.79272	1.38462	1.23538	1.57692	1.50128	2.07692	1.87453	2.61538	2.02142	12	2.66667	1.92275	1.16667	0.389249	1.58333	1.44338	2.16667	2.08167	2.66667	2.18812	14	2.5	1.74312	1.57143	1.65084	1.57143	1.60357	2	1.75412	2.57143	1.94992	1	D	none	undifferentiated		unclassified
542	ehre	honor	27	4.96296	1.8909	1.66667	1.27098	1.96296	1.42725	1.85185	1.32153	1.2963	0.868899	14	5.07143	1.97929	1.57143	1.15787	1.78571	1.3114	1.85714	1.35062	1.14286	0.363137	13	4.84615	1.86396	1.76923	1.42325	2.15385	1.57301	1.84615	1.3445	1.46154	1.19829	1	H	H	H		unclassified
1029	horde	horda	26	1.46154	0.947872	2.76923	1.94541	2	1.74356	3.88462	2.32081	2.88462	2.21498	12	1.16667	0.57735	1.91667	1.24011	1.41667	0.900337	3.33333	1.82574	2	1.7581	14	1.71429	1.13873	3.5	2.17503	2.5	2.13937	4.35714	2.64886	3.64286	2.34052	1	F	none	undifferentiated		unclassified
1030	hormon	hormonalny	26	2.07692	1.74179	2.07692	1.78713	2.19231	1.78928	2.96154	1.92833	2.34615	1.78756	11	1.81818	1.4013	2.63636	2.2033	3.18182	2.35874	3.90909	2.2563	2.72727	2.3277	15	2.26667	1.98086	1.66667	1.34519	1.46667	0.63994	2.26667	1.33452	2.06667	1.27988	1	F	none	undifferentiated		unclassified
1032	horoskop	horoskop	26	1.65385	1.49512	2.69231	1.80597	2.23077	1.63236	2.11538	1.79615	2.73077	1.95054	14	2	1.83973	2.21429	1.62569	1.85714	1.74784	1.78571	1.71772	2.21429	1.3688	12	1.25	0.866025	3.25	1.91288	2.66667	1.43548	2.5	1.88294	3.33333	2.38683	1	D	none	undifferentiated		unclassified
1033	horror	horror	26	2.5	2.00499	2.07692	1.64738	2.34615	1.62339	4.5	1.90263	2.53846	1.79401	14	2.07143	2.01778	1.92857	1.32806	2.71429	1.81568	4.78571	1.92867	2.64286	1.82323	12	3	1.95402	2.25	2.00567	1.91667	1.31137	4.16667	1.89896	2.41667	1.83196	1	F	F	F		F
1035	hotel	hotelowy	26	3.73077	2.32478	1.42308	0.808608	1.53846	1.17408	1.53846	0.904689	1.5	0.761577	15	3.73333	2.34419	1.4	0.736788	1.6	1.18322	1.73333	1.0328	1.46667	0.743223	11	3.72727	2.41209	1.45455	0.934199	1.45455	1.21356	1.27273	0.64667	1.54545	0.8202	1	H	none	H		unclassified
1037	human	humanitarny	26	4.11538	1.75104	1.30769	0.928191	1.96154	1.48272	1.61538	1.35873	1.42308	0.902134	12	4.33333	1.82574	1	0	1.83333	1.33712	1.41667	0.900337	1.08333	0.288675	14	3.92857	1.73046	1.57143	1.2225	2.07143	1.63915	1.78571	1.67233	1.71429	1.13873		H	H	H		unclassified
1039	humor	humor	26	5.61538	1.49872	1.23077	0.514408	1.5	1.10454	1.46154	1.10384	1.07692	0.271746	12	5.66667	1.30268	1.08333	0.288675	1.66667	1.49747	1.08333	0.288675	1	0	14	5.57143	1.6968	1.35714	0.633324	1.35714	0.633324	1.78571	1.42389	1.14286	0.363137	1	H	H	H		H
1285	launisch	humorzasty	26	1.5	1.27279	3.30769	1.80597	2.38462	1.6267	2.23077	1.36551	2.26923	1.61388	12	1.33333	0.651339	3.41667	1.62135	2.41667	1.83196	2.25	1.48477	2.75	2.09436	14	1.64286	1.64584	3.21429	2.00686	2.35714	1.49908	2.21429	1.3114	1.85714	0.949262		A	none	undifferentiated		A
1723	orkan	huragan	26	1.11538	0.325813	3.26923	1.92993	3.84615	2.23951	4.65385	2.07735	2.57692	1.90101	14	1.07143	0.267261	2.92857	1.63915	3.92857	2.49505	4.92857	2.12908	1.92857	1.20667	12	1.16667	0.389249	3.66667	2.22928	3.75	2.00567	4.33333	2.05971	3.33333	2.3094	1	F	none	undifferentiated		unclassified
2060	schaukel	huśtawka	26	4.80769	1.64971	1.57692	1.39063	1.73077	1.28243	2.07692	1.41204	1.38462	1.13409	13	4.92308	2.01914	1.76923	1.7867	2	1.52753	2.46154	1.6641	1.53846	1.39137	13	4.69231	1.25064	1.38462	0.869718	1.46154	0.967418	1.69231	1.03155	1.23077	0.83205	1	H	H	H		unclassified
1378	loblied	hymn	26	4.73077	2.14584	1.30769	0.970329	1.73077	1.07917	1.46154	1.02882	1.26923	0.827415	12	4.91667	2.06522	1.25	0.866025	1.41667	0.900337	1.5	1.16775	1.25	0.866025	14	4.57143	2.27746	1.35714	1.08182	2	1.1767	1.42857	0.937614	1.28571	0.82542	1	H	H	H		unclassified
1313	leitbild	idealny	26	4.96154	2.06844	1.88462	1.42343	1.61538	0.897861	2.23077	1.86135	1.61538	1.35873	12	5.16667	2.24958	1.91667	1.78164	1.41667	0.668558	1.91667	1.72986	1.75	1.71226	14	4.78571	1.96815	1.85714	1.09945	1.78571	1.0509	2.5	1.99036	1.5	1.01905	1	H	H	H		unclassified
1046	ideell	ideowy	26	2.69231	1.82799	2.15385	1.54123	1.73077	1.21845	2.19231	1.64971	2.46154	1.88108	12	2.83333	1.99241	2.08333	1.31137	1.25	0.621582	1.83333	1.02986	1.58333	0.996205	14	2.57143	1.74154	2.21429	1.76193	2.14286	1.46009	2.5	2.02864	3.21429	2.15473		H	none	undifferentiated		unclassified
1047	idiot	idiota	26	1.30769	0.837579	4.26923	1.99113	3.07692	1.80938	2.92308	1.85306	3.42308	2.17574	13	1.46154	1.1266	4.46154	1.5064	3.23077	2.08782	3.15385	1.77229	3.07692	1.89128	13	1.15385	0.375534	4.07692	2.4311	2.92308	1.5525	2.69231	1.97419	3.76923	2.45472	1	A	none	undifferentiated		unclassified
1048	idylle	idylla	26	5.11538	2.16013	1.23077	0.58704	1.5	1.02956	1.42308	0.757526	1.23077	0.710363	15	5.66667	1.91485	1.26667	0.593617	1.33333	0.617213	1.33333	0.617213	1.06667	0.258199	11	4.36364	2.3355	1.18182	0.603023	1.72727	1.42063	1.54545	0.934199	1.45455	1.03573	1	H	H	H		unclassified
1050	iglu	igloo	26	4	2	1	0	1.34615	0.689481	1.96154	1.70835	1.07692	0.271746	11	4.09091	1.81409	1	0	1.18182	0.603023	2	1.78885	1	0	15	3.93333	2.18654	1	0	1.46667	0.743223	1.93333	1.70992	1.13333	0.351866	1	H	H	H		unclassified
1632	nadel	igła	26	1.57692	0.902134	2.19231	1.67378	2.15385	1.61722	3.73077	1.95054	3	2.09762	14	1.42857	0.937614	1.92857	1.68543	2.14286	1.83375	3.92857	2.1649	3.28571	2.26779	12	1.75	0.866025	2.5	1.67874	2.16667	1.40346	3.5	1.73205	2.66667	1.92275	1	F	none	undifferentiated		F
1500	menge	ilość	26	2.03846	1.3109	1.38462	0.852147	1.30769	0.970329	1.42308	0.808608	1.23077	0.514408	12	2.41667	1.50504	1.16667	0.389249	1.08333	0.288675	1.25	0.621582	1.08333	0.288675	14	1.71429	1.06904	1.57143	1.08941	1.5	1.28602	1.57143	0.937614	1.35714	0.633324	1	H	none	undifferentiated		N
982	heißen	imię	26	3.15385	2.36123	1.65385	1.35476	1.57692	1.33186	1.53846	1.39229	1.42308	1.30148	11	3.63636	2.65604	1.18182	0.40452	1.27273	0.64667	1	0	1.09091	0.301511	15	2.8	2.14476	2	1.69031	1.8	1.65616	1.93333	1.75119	1.66667	1.67616		H	none	H		unclassified
2814	wucht	impet	26	2.42308	1.70113	2.61538	1.85638	1.57692	1.36156	2.5	1.90263	1.34615	0.977438	11	2.63636	1.43337	3.90909	1.7581	2	1.84391	3.09091	2.21154	1.27273	0.904534	15	2.26667	1.90738	1.66667	1.29099	1.26667	0.798809	2.06667	1.57963	1.4	1.0556	1	A	none	undifferentiated		unclassified
1054	import	importować	26	2.80769	1.72091	1.76923	1.21021	1.46154	0.646886	1.96154	1.48272	1.46154	0.811456	14	2.28571	1.43734	1.85714	1.40642	1.35714	0.497245	2.14286	1.83375	1.28571	0.61125	12	3.41667	1.88092	1.66667	0.984732	1.58333	0.792961	1.75	0.965307	1.66667	0.984732	1	H	none	undifferentiated		unclassified
1758	party	impreza	26	4.92308	1.59808	1.46154	0.904689	1.73077	1.34336	2.46154	1.74885	1.84615	1.28662	15	5.06667	1.70992	1.73333	1.09978	1.73333	1.43759	2.53333	1.84649	1.53333	0.743223	11	4.72727	1.48936	1.09091	0.301511	1.72727	1.27208	2.36364	1.68954	2.27273	1.73729	1	H	H	H		unclassified
1055	impuls	impuls	26	3.11538	1.9458	1.88462	1.36607	1.53846	0.989172	2.23077	1.42289	1.42308	0.856648	11	3.45455	1.75292	2.27273	1.48936	2.09091	1.30035	2.81818	1.60114	1.63636	1.20605	15	2.86667	2.09989	1.6	1.24212	1.13333	0.351866	1.8	1.14642	1.26667	0.457738	1	H	none	undifferentiated		unclassified
2686	vorfall	incydent	27	1.51852	1.25178	2.77778	1.62512	2.81481	1.71053	3.14815	1.81243	1.74074	1.3754	14	1.71429	1.63747	3.14286	1.79131	3	1.88108	2.92857	1.85904	1.42857	0.937614	13	1.30769	0.630425	2.38462	1.38675	2.61538	1.55662	3.38462	1.80455	2.07692	1.70595	1	F	none	blended	FSA	unclassified
220	auskunft	informować	26	2.73077	1.5889	1.76923	1.1422	1.69231	1.01071	2.34615	1.26309	1.34615	0.745241	12	2.75	1.71226	1.33333	0.651339	1.25	0.452267	1.66667	0.778499	1.08333	0.288675	14	2.71429	1.54066	2.14286	1.35062	2.07143	1.20667	2.92857	1.32806	1.57143	0.937614	1	H	none	undifferentiated		unclassified
1059	initiative	inicjatywa	27	4.14815	1.43322	1.85185	1.2921	1.7037	0.992852	2.51852	1.50308	1.51852	0.935224	14	4.64286	1.15073	2.28571	1.32599	2	1.03775	2.71429	1.38278	1.78571	0.974961	13	3.61538	1.55662	1.38462	1.1209	1.38462	0.869718	2.30769	1.6525	1.23077	0.83205		H	H	H		unclassified
1063	instrument	instrument	26	4.84615	2.03356	1.69231	1.4634	1.46154	1.06699	1.34615	0.891843	1.30769	1.01071	13	5.38462	1.80455	1.76923	1.64083	1.61538	1.38675	1.15385	0.375534	1.07692	0.27735	13	4.30769	2.17503	1.61538	1.3253	1.30769	0.630425	1.53846	1.19829	1.53846	1.39137		H	H	H		unclassified
1062	instinkt	instynktowny	27	3.7037	2.05342	1.44444	0.847319	1.22222	0.57735	2.22222	1.47631	1.37037	0.92604	14	4.21429	2.11873	1.35714	0.744946	1.28571	0.61125	1.78571	1.3114	1	0	13	3.15385	1.90815	1.53846	0.967418	1.15385	0.5547	2.69231	1.54837	1.76923	1.23517	1	H	none	H		unclassified
308	behörde	instytucja	27	1.88889	1.36814	2.33333	1.4676	2.03704	1.37229	2.85185	1.68029	2.25926	1.55891	14	2.35714	1.64584	2.92857	1.54244	2.35714	1.44686	3.21429	1.42389	2.71429	1.77281	13	1.38462	0.767948	1.69231	1.1094	1.69231	1.25064	2.46154	1.89804	1.76923	1.16575	1	F	none	undifferentiated		unclassified
2759	weisheit	inteligentny	26	6.11538	1.03255	1.34615	0.845804	1.42308	1.23849	1.38462	0.803837	1.07692	0.271746	14	6	1.1767	1.5	1.09193	1.14286	0.363137	1.42857	0.937614	1.14286	0.363137	12	6.25	0.866025	1.16667	0.389249	1.75	1.76455	1.33333	0.651339	1	0	1	H	H	H		H
1064	intensiv	intensywny	27	3.74074	1.65466	1.77778	1.45002	1.7037	1.32476	1.92593	1.46566	1.77778	1.45002	14	4.42857	1.74154	1.78571	0.892582	1.78571	1.18831	1.92857	1.32806	1.92857	1.68543	13	3	1.22474	1.76923	1.92154	1.61538	1.50214	1.92308	1.65638	1.61538	1.19293		H	H	H		unclassified
1163	klient	interesant	26	1.88462	1.24344	2.80769	1.85514	2	1.26491	2.57692	1.67745	2.73077	2.10823	11	1.72727	1.19087	3.63636	2.15744	2.27273	1.55505	3.09091	2.0226	3	2.19089	15	2	1.30931	2.2	1.37321	1.8	1.01419	2.2	1.32017	2.53333	2.09989	1	A	none	undifferentiated		unclassified
2240	spannend	interesujący	26	4.11538	1.75104	1.5	1.17473	1.5	1.2083	1.88462	1.55761	1.46154	1.17408	12	4.58333	1.24011	1.5	1.446	1.58333	1.50504	1.66667	1.61433	1.41667	1.44338	14	3.71429	2.05421	1.5	0.94054	1.42857	0.937614	2.07143	1.54244	1.5	0.94054		H	H	H		unclassified
492	deutung	interpretować	26	2.46154	1.81617	2.38462	1.85638	1.76923	1.1422	1.96154	1.34107	1.57692	1.06482	12	2.41667	1.31137	2.33333	1.72328	1.83333	1.19342	2.16667	1.58592	1.5	1	14	2.5	2.21012	2.42857	2.02729	1.71429	1.13873	1.78571	1.12171	1.64286	1.15073	1	H	none	undifferentiated		unclassified
2440	tonfall	intonować	26	2.34615	1.57334	1.38462	0.803837	1.23077	0.514408	1.57692	0.945434	1.46154	1.30325	14	1.57143	1.15787	1.42857	0.937614	1.14286	0.363137	1.5	0.85485	1.14286	0.363137	12	3.25	1.54479	1.33333	0.651339	1.33333	0.651339	1.66667	1.07309	1.83333	1.85047	1	H	none	undifferentiated		N
1067	intrige	intryga	26	1.76923	1.45073	4	2.07846	3.03846	2.08769	3.96154	2.19965	3.15385	2.12964	11	1.54545	1.03573	4.27273	2.3277	3.63636	2.37793	4.45455	2.50454	3.36364	2.4606	15	1.93333	1.70992	3.8	1.93465	2.6	1.80476	3.6	1.95667	3	1.92725	1	A	none	undifferentiated		unclassified
1066	intim	intymny	26	3.92308	1.95802	1.46154	1.33359	1.46154	1.20767	2.5	1.96469	1.73077	1.21845	12	4.58333	2.23437	1.66667	1.77525	1.66667	1.72328	2.5	2.0226	1.33333	0.492366	14	3.35714	1.54955	1.28571	0.82542	1.28571	0.468807	2.5	1.99036	2.07143	1.54244		H	none	H		unclassified
2558	unmut	irytować	26	1.07692	0.271746	5.23077	1.47804	3.30769	1.73826	2.11538	1.53172	3.26923	2.06993	13	1.07692	0.27735	5.76923	1.36344	3.23077	1.92154	2.53846	1.5064	3.15385	2.19265	13	1.07692	0.27735	4.69231	1.4367	3.38462	1.60927	1.69231	1.49358	3.38462	2.02231	1	A	A	A		A
804	funke	iskra	26	3.61538	2.02142	1.84615	1.64176	1.80769	1.64971	3.11538	2.02636	1.61538	1.41639	13	3.92308	2.10006	2.07692	1.75412	2.23077	2.08782	3.53846	2.3315	1.84615	1.77229	13	3.30769	1.97419	1.61538	1.55662	1.38462	0.960769	2.69231	1.6525	1.38462	0.960769	1	H	none	blended	HF	unclassified
1072	islam	Islam	27	1.96296	1.48016	3.07407	2.0367	3.11111	1.9282	3.74074	1.65466	2.59259	2.11695	14	2.14286	1.74784	2.92857	2.1649	3.42857	1.91007	3.92857	1.97929	2.5	2.31218	13	1.76923	1.16575	3.23077	1.96443	2.76923	1.96443	3.53846	1.26592	2.69231	1.97419	1	F	none	undifferentiated		unclassified
346	bestehen	istnieć	26	4.88462	2.08474	2.03846	1.92833	2.38462	2.06062	2.80769	2.03998	1.96154	1.98959	12	5.41667	1.67649	2.16667	1.89896	2.33333	1.96946	2.91667	1.88092	1.91667	1.83196	14	4.42857	2.34404	1.92857	2.01778	2.42857	2.20887	2.71429	2.23361	2	2.18386		H	none	H		unclassified
843	gehen	iść	26	3.5	2.00499	1.42308	1.06482	1.46154	0.989172	1.38462	0.637302	1.11538	0.325813	12	3.75	2.0505	1.16667	0.389249	1.25	0.452267	1.41667	0.668558	1.08333	0.288675	14	3.28571	2.01642	1.64286	1.39268	1.64286	1.27745	1.35714	0.633324	1.14286	0.363137		H	H	H		unclassified
1098	kammer	izba	26	2.30769	1.87124	1.92308	1.49461	2.03846	1.58697	2.15385	1.54123	2.34615	1.99885	13	2.84615	2.23033	1.38462	0.869718	1.92308	1.5525	1.92308	1.44115	1.92308	1.75412	13	1.76923	1.30089	2.46154	1.8081	2.15385	1.67562	2.38462	1.66024	2.76923	2.20431	1	D	none	undifferentiated		unclassified
2343	stube	izdebka	26	2.34615	1.32491	1.84615	1.25514	2.30769	1.49048	2.03846	1.21592	1.76923	1.39449	14	2	1.4676	1.42857	0.937614	2	1.03775	1.78571	1.25137	1.07143	0.267261	12	2.75	1.05529	2.33333	1.43548	2.66667	1.87487	2.33333	1.1547	2.58333	1.72986	1	H	none	undifferentiated		unclassified
153	apfel	jabłkowy	26	4.53846	2.04413	1.42308	1.23849	1.65385	1.57334	1.42308	1.50128	1.57692	1.50128	12	5.16667	2.24958	1.5	1.446	1.83333	1.58592	1.41667	1.44338	1.5	1.446	14	4	1.75412	1.35714	1.08182	1.5	1.60528	1.42857	1.60357	1.64286	1.59842	1	H	H	H		unclassified
2824	yacht	jacht	26	4.23077	1.83973	1.42308	0.945434	1.46154	0.811456	2.15385	1.4613	1.23077	0.514408	14	4.07143	1.77436	1.57143	1.15787	1.28571	0.468807	1.92857	1.43925	1.14286	0.534522	12	4.41667	1.97523	1.25	0.621582	1.66667	1.07309	2.41667	1.50504	1.33333	0.492366	1	H	H	H		unclassified
1890	qualität	jakość	26	4	2.0199	1.76923	1.47804	1.5	1.10454	1.92308	1.49461	1.42308	1.06482	12	4	1.7581	1.58333	1.50504	1.16667	0.57735	2.16667	1.64225	1.25	0.452267	14	4	2.28709	1.92857	1.49174	1.78571	1.3688	1.71429	1.38278	1.57143	1.39859	1	H	H	H		unclassified
85	almosen	jałmużna	26	1.80769	1.23351	2.88462	1.65715	3	1.69706	2	1.44222	2.88462	2.16013	14	1.85714	1.29241	2.64286	1.64584	2.92857	1.38477	1.71429	0.913874	2.42857	1.98898	12	1.75	1.21543	3.16667	1.6967	3.08333	2.06522	2.33333	1.87487	3.41667	2.31432	1	S	none	undifferentiated		unclassified
929	grube	jama	26	1.96154	1.53573	1.73077	1.40165	1.80769	1.41476	2.88462	1.92514	2.15385	1.75937	11	2.09091	1.7581	1.72727	1.42063	2.09091	1.3751	3.18182	1.99089	2.63636	2.2033	15	1.86667	1.40746	1.73333	1.43759	1.6	1.45406	2.66667	1.91485	1.8	1.32017	1	F	none	undifferentiated		unclassified
464	dackel	jamnik	27	3.59259	2.00498	1.88889	1.36814	1.33333	1.03775	1.33333	0.679366	1.59259	1.08342	14	2.85714	2.10703	1.57143	0.851631	1.21429	0.578934	1.5	0.759555	1.85714	1.35062	13	4.38462	1.60927	2.23077	1.73944	1.46154	1.39137	1.15385	0.5547	1.30769	0.630425	1	H	none	H		unclassified
1074	japan	Japonia	27	3.25926	1.93336	1.66667	1.14354	1.59259	1.08342	2.07407	1.59147	1.77778	1.28103	14	3.35714	2.09788	1.35714	0.928783	1.35714	0.928783	1.85714	1.51186	1.64286	1.15073	13	3.15385	1.81871	2	1.29099	1.84615	1.21423	2.30769	1.70219	1.92308	1.44115	1	H	none	H		unclassified
1155	klarheit	jasność	27	4.88889	1.52753	1.62963	1.47148	1.62963	1.4451	1.25926	0.525693	1.40741	0.971092	14	5.14286	1.65748	1.57143	1.60357	1.78571	1.52812	1.21429	0.425815	1.21429	0.425815	13	4.61538	1.38675	1.69231	1.37747	1.46154	1.39137	1.30769	0.630425	1.61538	1.3253	1	H	H	H		unclassified
548	eidechse	jaszczurka	26	2.57692	2.02333	1.30769	0.884047	1.26923	0.603834	2.19231	1.69751	2.30769	1.95488	11	1.90909	1.92117	1.45455	1.21356	1.18182	0.603023	2.72727	2.05382	3.18182	2.35874	15	3.06667	2.0166	1.2	0.560612	1.33333	0.617213	1.8	1.32017	1.66667	1.34519	1	H	none	blended	HDF	unclassified
680	fahrt	jazda	27	4.51852	1.90889	1.33333	0.620174	1.22222	0.423659	2.77778	1.60128	1.11111	0.423659	14	4.57143	1.91007	1.28571	0.61125	1.28571	0.468807	2.57143	1.65084	1.07143	0.267261	13	4.46154	1.98391	1.38462	0.650444	1.15385	0.375534	3	1.58114	1.15385	0.5547	1	H	none	H		unclassified
1077	jazz	jazz	26	3.34615	2.07735	1.61538	1.23538	1.92308	1.57285	1.38462	0.752432	1.46154	1.1395	15	3.26667	2.08624	1.53333	1.0601	1.8	1.42428	1.53333	0.915475	1.26667	0.457738	11	3.45455	2.16165	1.72727	1.48936	2.09091	1.81409	1.18182	0.40452	1.72727	1.67874	1	H	none	H		unclassified
2280	stammeln	jąkała	27	1.7037	1.4362	2.18519	1.38778	3.2963	1.85669	2.18519	1.66496	2.18519	1.54514	14	1.71429	1.20439	2.85714	1.51186	4.07143	1.68543	3.07143	1.85904	2.71429	1.68379	13	1.69231	1.70219	1.46154	0.77625	2.46154	1.71345	1.23077	0.599145	1.61538	1.19293		S	none	undifferentiated		S
2326	stottern	jąkanie	27	1.40741	0.930643	2.88889	2.02548	3.11111	1.67179	2.62963	2.04089	1.81481	1.56984	14	1.35714	0.744946	3.14286	2.0702	2.92857	1.94004	2.71429	2.1989	1.78571	1.71772	13	1.46154	1.1266	2.61538	2.02231	3.30769	1.37747	2.53846	1.94145	1.84615	1.46322		S	none	undifferentiated		unclassified
677	fahren	jechać	26	4.61538	2.04112	1.30769	0.788377	1.5	1.10454	2.30769	1.76112	1.38462	1.13409	12	4.41667	1.78164	1.41667	0.996205	1.33333	0.887625	2.58333	1.88092	1.41667	0.900337	14	4.78571	2.29309	1.21429	0.578934	1.64286	1.27745	2.07143	1.68543	1.35714	1.33631		H	H	H		unclassified
561	einheit	jedność	26	4.46154	2.12096	1.73077	1.4299	1.80769	1.35703	1.73077	1.37281	1.30769	0.679366	12	4.41667	2.46644	2.16667	1.94625	1.83333	1.52753	2.08333	1.83196	1.41667	0.792961	14	4.5	1.87083	1.35714	0.633324	1.78571	1.25137	1.42857	0.755929	1.21429	0.578934	1	H	H	H		unclassified
2161	seide	jedwabny	27	4.81481	1.88184	1	0	1	0	1.07407	0.26688	1	0	14	5.07143	2.12908	1	0	1	0	1.14286	0.363137	1	0	13	4.53846	1.61325	1	0	1	0	1	0	1	0	1	H	H	H		H
1013	hirsch	jeleń	26	2.88462	1.42343	1.19231	0.633671	1.34615	0.79711	1.84615	1.40548	1.19231	0.401918	12	2.5	1.446	1.16667	0.389249	1.5	1	1.83333	1.19342	1.16667	0.389249	14	3.21429	1.3688	1.21429	0.801784	1.21429	0.578934	1.85714	1.61041	1.21429	0.425815	1	H	none	H		unclassified
470	darm	jelito	26	1.73077	1.45761	1.57692	1.4744	1.53846	1.36325	2.23077	1.70429	3.42308	1.98339	12	1.5	1	2	1.95402	2.16667	1.85047	2.58333	2.19331	4.08333	2.23437	14	1.92857	1.77436	1.21429	0.801784	1	0	1.92857	1.14114	2.85714	1.61041	1	D	none	undifferentiated		D
992	herbst	jesienny	26	2.88462	1.53172	2	1.32665	3.84615	1.91191	2.07692	1.44009	1.80769	1.23351	15	3.2	1.37321	2.13333	1.50555	4.2	2.00713	2.46667	1.64172	1.6	0.828079	11	2.45455	1.69491	1.81818	1.07872	3.36364	1.74773	1.54545	0.934199	2.09091	1.6404	1	S	none	undifferentiated		S
662	essen	jeść	26	5.5	1.30384	1.53846	0.947872	1.57692	1.06482	1.53846	1.24035	1.34615	0.745241	12	5.83333	1.11464	1.66667	1.07309	1.5	1	1.5	1.16775	1.41667	0.900337	14	5.21429	1.42389	1.42857	0.851631	1.64286	1.15073	1.57143	1.34246	1.28571	0.61125		H	H	H		H
2147	see	jezioro	26	5.03846	1.73161	1.07692	0.271746	1.57692	1.27037	2.03846	1.42775	1.30769	0.735893	12	5.33333	1.61433	1.16667	0.389249	1.33333	0.651339	1.91667	0.996205	1.5	0.904534	14	4.78571	1.84718	1	0	1.78571	1.62569	2.14286	1.74784	1.14286	0.534522		H	H	H		unclassified
1953	reiter	jeździecki	26	2.57692	1.72448	1.26923	0.533494	1.38462	1.02282	1.73077	1.48479	1.19231	0.69393	13	3.15385	1.81871	1.23077	0.438529	1.53846	1.33012	2.23077	1.92154	1.15385	0.5547	13	2	1.47196	1.30769	0.630425	1.23077	0.599145	1.23077	0.599145	1.23077	0.83205	1	H	none	undifferentiated		N
1049	igel	jeż	26	4.07692	1.49461	1.42308	0.986836	1.61538	1.0612	1.38462	0.637302	1.38462	1.0612	13	4.30769	1.70219	1.23077	0.438529	1.30769	0.630425	1.38462	0.50637	1.46154	1.39137	13	3.84615	1.28103	1.61538	1.3253	1.92308	1.32045	1.38462	0.767948	1.30769	0.630425	1	H	H	H		unclassified
844	geheul	jęczeć	27	2.92593	2.16486	2.92593	1.99857	2.77778	1.88788	2.88889	1.9282	2.2963	1.4888	14	2.64286	1.78054	3.42857	2.02729	3.07143	2.12908	2.71429	2.05421	2.21429	1.76193	13	3.23077	2.55453	2.38462	1.89466	2.46154	1.61325	3.07692	1.84669	2.38462	1.19293	1	none	none	undifferentiated		unclassified
2264	sprache	język	26	3	2.1166	1.19231	0.401918	1.38462	1.20256	1.65385	1.35476	1.5	1.24097	12	2.66667	1.82574	1.25	0.452267	1.25	0.452267	1.58333	0.996205	1.41667	0.668558	14	3.28571	2.36736	1.14286	0.363137	1.5	1.60528	1.71429	1.63747	1.57143	1.60357	1	H	none	H		unclassified
1797	phonem	językowy	26	2.23077	1.77331	2.38462	2.21046	2	1.78885	1.96154	1.73161	2.03846	1.75455	12	1.91667	1.44338	2.5	2.39317	2.25	1.95982	2.5	2.19504	2.5	2.39317	14	2.5	2.02864	2.28571	2.12779	1.78571	1.67233	1.5	1.09193	1.64286	0.841897	1	A	none	undifferentiated		unclassified
2380	tanne	jodła	26	3.57692	1.74753	1.15385	0.612686	1.30769	0.617688	1.11538	0.588348	1.15385	0.612686	12	3.5	1.446	1.08333	0.288675	1.33333	0.651339	1	0	1.08333	0.288675	14	3.64286	2.02322	1.21429	0.801784	1.28571	0.61125	1.21429	0.801784	1.21429	0.801784	1	H	H	H		unclassified
1085	kabel	kabel	26	1.88462	1.98649	3.07692	2.01838	2.26923	1.92993	2.80769	2.29816	2.53846	2.23125	12	1.33333	0.887625	3.33333	2.01509	2.16667	1.85047	3.16667	2.36771	3	2.3355	14	2.35714	2.53004	2.85714	2.0702	2.35714	2.06089	2.5	2.27866	2.14286	2.14322	1	A	none	undifferentiated		unclassified
595	ente	kaczka	26	3.15385	1.89087	1.34615	0.93562	1.30769	0.970329	1.34615	1.05612	1.69231	1.37896	15	3.26667	1.94447	1.53333	1.18723	1.46667	1.24595	1.53333	1.35576	1.93333	1.70992	11	3	1.89737	1.09091	0.301511	1.09091	0.301511	1.09091	0.301511	1.36364	0.6742	1	H	none	H		unclassified
1479	maulkorb	kaganiec	27	1.55556	1.08604	2.74074	1.63125	3.03704	1.7205	3.2963	1.68283	2.59259	1.64689	14	1.92857	1.32806	3.35714	1.69193	3.57143	1.82775	3.85714	1.51186	3.07143	1.8172	13	1.15385	0.5547	2.07692	1.32045	2.46154	1.45002	2.69231	1.70219	2.07692	1.32045	1	F	none	undifferentiated		unclassified
1089	kakao	kakao	26	5.19231	1.87658	1.19231	0.633671	1.34615	0.845804	1.19231	0.800961	1.34615	1.09334	15	5.4	1.68184	1.06667	0.258199	1.13333	0.351866	1.06667	0.258199	1	0	11	4.90909	2.16585	1.36364	0.924416	1.63636	1.20605	1.36364	1.20605	1.81818	1.60114	1	H	H	H		H
1091	kaktus	kaktus	27	3.25926	1.97275	1.85185	1.06351	1.40741	0.843949	1.66667	1.1767	1.81481	1.41522	14	3	1.92154	1.64286	1.00821	1.21429	0.578934	1.71429	1.38278	2.14286	1.70326	13	3.53846	2.06621	2.07692	1.11516	1.61538	1.04391	1.61538	0.960769	1.46154	0.967418	1	H	none	H		unclassified
1185	kohlrabi	kalarepa	26	2.03846	1.48272	1.34615	1.01754	1.5	1.33417	1.38462	0.982931	2.11538	1.53172	12	2.41667	1.62135	1.25	0.866025	1.33333	0.887625	1.25	0.866025	1.91667	1.62135	14	1.71429	1.32599	1.42857	1.15787	1.64286	1.64584	1.5	1.09193	2.28571	1.48989	1	D	none	undifferentiated		N
1922	rechnen	kalkulować	27	2.44444	1.60128	2.18519	1.46857	1.51852	0.935224	2.18519	1.35978	1.48148	1.22067	14	2.42857	1.82775	2.28571	1.77281	1.35714	0.633324	2.42857	1.45255	1.57143	1.34246	13	2.46154	1.39137	2.07692	1.11516	1.69231	1.18213	1.92308	1.25576	1.38462	1.1209		H	none	undifferentiated		unclassified
1092	kalorie	kaloryczny	26	2.96154	1.70835	2.57692	1.90101	2.42308	1.74753	2.65385	1.97873	2.03846	1.50946	11	3.27273	2.24013	3.45455	2.38175	2.81818	2.08893	2.63636	2.24823	2.09091	1.7581	15	2.73333	1.2228	1.93333	1.16292	2.13333	1.45733	2.66667	1.83874	2	1.36277	1	H	none	undifferentiated		unclassified
1094	kamera	kamera	26	3.38462	2.09908	1.84615	1.37673	1.73077	1.37281	2.65385	1.74224	1.76923	1.65669	13	3.15385	2.23033	2.07692	1.65638	2.07692	1.75412	2.92308	1.70595	2.38462	2.18092	13	3.61538	2.02231	1.61538	1.04391	1.38462	0.767948	2.38462	1.80455	1.15385	0.375534	1	H	none	undifferentiated		unclassified
89	altbau	kamienica	26	2.61538	1.81278	1.46154	0.904689	2	1.41421	1.92308	1.44009	1.69231	1.08699	11	2.36364	1.85864	1.18182	0.603023	2	1.61245	2	1.54919	1.45455	0.934199	15	2.8	1.82052	1.66667	1.04654	2	1.30931	1.86667	1.40746	1.86667	1.18723	1	H	none	undifferentiated		unclassified
2302	stein	kamienny	26	1.92308	1.67148	1.92308	1.80938	1.88462	1.33647	2.03846	1.94896	1.42308	1.13747	12	2	1.53741	2.08333	1.83196	2.08333	1.37895	1.91667	1.97523	1.5	1.24316	14	1.85714	1.83375	1.78571	1.84718	1.71429	1.32599	2.14286	1.9945	1.35714	1.08182	1	F	none	undifferentiated		unclassified
2780	weste	kamizelka	26	1.96154	1.3109	1.30769	0.679366	1.76923	1.21021	1.34615	0.745241	1.57692	0.986836	15	1.4	0.910259	1.13333	0.516398	1.53333	0.99043	1.26667	0.593617	1.53333	0.833809	11	2.72727	1.42063	1.54545	0.8202	2.09091	1.446	1.45455	0.934199	1.63636	1.20605	1	H	none	undifferentiated		N
2386	tarnung	kamuflować	26	1.69231	1.28901	1.53846	0.760567	2	1.44222	2.84615	1.48842	1.42308	0.856648	12	1.75	0.866025	1.41667	0.668558	2.16667	1.64225	2.58333	1.37895	1.33333	0.887625	14	1.64286	1.59842	1.64286	0.841897	1.85714	1.29241	3.07143	1.59153	1.5	0.85485	1	F	none	undifferentiated		F
1102	kanal	kanał	27	1.77778	1.39596	1.66667	1.24035	2.2963	1.72793	2.96296	2.13904	2.88889	2.10006	14	1.71429	1.13873	1.42857	0.755929	2.21429	1.80506	2.71429	2.16364	2.92857	2.09263	13	1.84615	1.67562	1.92308	1.60528	2.38462	1.7097	3.23077	2.16617	2.84615	2.19265	1	F	none	undifferentiated		unclassified
2030	sandwich	kanapka	27	4.14815	2.0325	1.40741	0.930643	1.2963	0.6688	1.44444	1.01274	1.33333	0.733799	14	4.35714	1.94569	1.78571	1.18831	1.57143	0.851631	1.85714	1.29241	1.57143	0.937614	13	3.92308	2.17798	1	0	1	0	1	0	1.07692	0.27735	1	H	H	H		unclassified
1420	madeira	kanaryjski	27	4.77778	1.88788	1.22222	0.697982	1.18519	0.622466	1.33333	0.733799	1.11111	0.57735	14	5	1.88108	1.07143	0.267261	1.07143	0.267261	1.21429	0.578934	1	0	13	4.53846	1.94145	1.38462	0.960769	1.30769	0.85485	1.46154	0.877058	1.23077	0.83205	1	H	H	H		H
1110	kanzler	kanclerz	26	1.80769	1.47022	2.15385	1.86959	2.03846	1.68477	2.23077	1.60767	1.84615	1.34736	12	1.58333	1.08362	1.66667	1.37069	1.58333	1.37895	1.83333	1.58592	1.33333	0.887625	14	2	1.75412	2.57143	2.17377	2.42857	1.86936	2.57143	1.60357	2.28571	1.54066	1	F	none	undifferentiated		unclassified
373	bewerber	kandydat	26	3.11538	1.45126	1.84615	1.48842	1.53846	0.947872	1.92308	1.41204	1.42308	0.902134	14	3	1.6641	1.42857	1.08941	1.07143	0.267261	2	1.56893	1.14286	0.363137	12	3.25	1.21543	2.33333	1.77525	2.08333	1.1645	1.83333	1.2673	1.75	1.21543	1	H	none	H		unclassified
1103	kandidatur	kandydatura	27	2.7037	1.72793	1.96296	1.48016	1.81481	1.41522	2.44444	1.8674	1.88889	1.50214	14	3.07143	1.38477	2.21429	1.25137	2	1.1094	3	1.88108	2.07143	1.32806	13	2.30769	2.01596	1.69231	1.70219	1.61538	1.7097	1.84615	1.72463	1.69231	1.70219		H	none	undifferentiated		unclassified
1104	känguruh	kangur	27	3.55556	1.78311	1.2963	0.775332	1.25926	0.813	1.85185	1.40613	1.33333	0.960769	14	4.21429	1.76193	1.35714	0.744946	1.28571	0.82542	2.07143	1.68543	1.35714	1.08182	13	2.84615	1.57301	1.23077	0.83205	1.23077	0.83205	1.61538	1.04391	1.30769	0.85485	1	H	none	H		unclassified
1106	kanon	kanon	26	2.26923	1.51149	1.73077	1.25085	1.5	0.989949	1.57692	1.17211	1.46154	0.811456	12	2.08333	1.37895	1.41667	0.792961	1.16667	0.57735	1.33333	0.778499	1.25	0.621582	14	2.42857	1.65084	2	1.51911	1.78571	1.18831	1.78571	1.42389	1.64286	0.928783	1	H	none	undifferentiated		N
1801	pilot	kapitan	27	3.59259	2.04299	1.59259	1.04731	1.48148	1.15593	1.74074	1.12976	1.18519	0.483341	14	3.85714	1.95555	1.5	0.85485	1.71429	1.48989	1.64286	0.928783	1.07143	0.267261	13	3.30769	2.17503	1.69231	1.25064	1.23077	0.599145	1.84615	1.3445	1.30769	0.630425	1	H	none	H		unclassified
25	abkehr	kapitulować	26	1.34615	1.23101	3.84615	2.36123	4.11538	2.19685	3.65385	2.18984	2.61538	1.87781	12	1	0	4.16667	2.65718	3.91667	2.67848	3.41667	2.31432	3	2.13201	14	1.64286	1.64584	3.57143	2.13809	4.28571	1.77281	3.85714	2.14322	2.28571	1.63747	1	S	none	undifferentiated		unclassified
1462	marotte	kaprys	26	2.26923	1.34336	2.88462	1.65715	1.69231	1.15825	1.69231	1.12318	1.96154	1.39945	11	1.90909	0.94388	3.81818	1.77866	1.72727	1.42063	1.54545	0.8202	1.81818	1.4013	15	2.53333	1.55226	2.2	1.20712	1.66667	0.9759	1.8	1.32017	2.06667	1.43759	1	A	none	undifferentiated		A
2328	strafe	kara	26	1.26923	0.874423	4.38462	2.22849	4.46154	2.2844	4.92308	2.11515	3.42308	2.10092	11	1	0	4.81818	2.18258	5.36364	1.91169	5.81818	1.77866	3.27273	1.79393	15	1.46667	1.12546	4.06667	2.28244	3.8	2.36643	4.26667	2.15362	3.53333	2.35635	1	F	none	undifferentiated		unclassified
2329	strafen	karać	27	1.2963	0.775332	4.07407	1.81714	4.07407	1.95971	4.2963	1.99644	3.18519	2.11291	14	1.14286	0.534522	4.5	2.13937	4.5	2.21012	4.78571	2.04483	3.42857	2.37663	13	1.46154	0.967418	3.61538	1.3253	3.61538	1.60927	3.76923	1.87767	2.92308	1.84669		F	none	undifferentiated		unclassified
1112	karaffe	karafka	27	3.25926	2.17667	1.22222	0.50637	1.40741	1.00992	1.2963	0.992852	1.07407	0.26688	14	3.21429	2.19014	1.21429	0.425815	1.5	1.3445	1.5	1.3445	1	0	13	3.30769	2.25036	1.23077	0.599145	1.30769	0.480384	1.07692	0.27735	1.15385	0.375534	1	H	none	H		N
2327	strafbar	karalny	26	1.23077	0.710363	3.57692	2.23021	3.42308	2.30084	4.5	1.96469	2.57692	2.23021	11	1.27273	0.904534	3.45455	2.29624	4.18182	2.40076	4.72727	2.00454	2.09091	1.81409	15	1.2	0.560612	3.66667	2.25726	2.86667	2.13363	4.33333	1.98806	2.93333	2.49189		F	none	undifferentiated		unclassified
2044	schabe	karaluch	26	1.23077	0.710363	3.26923	2.2371	2.84615	2.37811	3.88462	2.35503	5.38462	2.19229	12	1	0	3.75	2.37888	3.33333	2.60536	5.33333	2.14617	6.91667	0.288675	14	1.42857	0.937614	2.85714	2.10703	2.42857	2.17377	2.64286	1.78054	4.07143	2.269	1	D	none	undifferentiated		unclassified
2667	verweis	karcić	27	1.55556	1.25064	3.48148	1.71801	3.44444	1.62512	3.55556	1.80455	2.92593	1.68537	14	1.85714	1.61041	4	1.75412	4.28571	1.72888	4.35714	1.69193	3.64286	1.86495	13	1.23077	0.599145	2.92308	1.5525	2.53846	0.877058	2.69231	1.54837	2.15385	1.06819	1	F	none	undifferentiated		unclassified
1114	karriere	kariera	27	5.18519	1.41522	2.25926	1.48305	1.92593	1.10683	3.48148	1.82652	1.48148	1.18874	14	5.35714	1.44686	2.21429	1.67233	2.07143	1.26881	3.5	1.82925	1.64286	1.59842	13	5	1.41421	2.30769	1.31559	1.76923	0.926809	3.46154	1.89804	1.30769	0.480384	1	H	H	H		unclassified
691	fasching	karnawałowy	26	4.80769	1.8115	1.26923	0.603834	1.42308	0.808608	1.30769	0.735893	1.26923	0.827415	15	4.93333	2.0166	1.26667	0.593617	1.46667	0.833809	1.4	0.828079	1.2	0.414039	11	4.63636	1.5667	1.27273	0.64667	1.36364	0.80904	1.18182	0.603023	1.36364	1.20605	1	H	H	H		unclassified
2855	zettel	kartka	26	2.57692	1.92194	1.23077	0.710363	1.73077	1.61388	1.26923	0.533494	1.11538	0.588348	11	2.45455	1.86353	1.36364	0.924416	1.81818	1.66242	1.27273	0.467099	1	0	15	2.66667	2.02367	1.13333	0.516398	1.66667	1.63299	1.26667	0.593617	1.2	0.774597	1	H	none	undifferentiated		N
1743	pappe	karton	26	2.03846	1.42775	1.84615	1.28662	1.84615	1.31734	1.84615	1.34736	1.61538	1.20256	15	1.8	1.14642	2.26667	1.48645	2.13333	1.59762	2.13333	1.50555	1.86667	1.45733	11	2.36364	1.74773	1.27273	0.64667	1.45455	0.687552	1.45455	1.03573	1.27273	0.64667	1	H	none	undifferentiated		N
1116	kartei	kartoteka	26	1.46154	0.989172	2.46154	2.15835	2.23077	1.98611	3.5	2.21359	2.65385	2.26172	11	1.36364	0.6742	2.27273	2.05382	2.27273	2.00454	3.54545	2.20743	1.90909	1.57826	15	1.53333	1.18723	2.6	2.29285	2.2	2.04241	3.46667	2.29492	3.2	2.56905	1	F	none	undifferentiated		unclassified
1121	kasse	kasa	27	4.51852	2.17274	2.11111	1.67179	1.7037	1.40917	2.14815	1.58609	1.62963	1.4451	14	4.85714	2.24832	1.85714	1.70326	1.64286	1.64584	2.21429	1.96815	1.42857	1.60357	13	4.15385	2.11527	2.38462	1.66024	1.76923	1.16575	2.07692	1.11516	1.84615	1.28103	1	H	H	H		unclassified
1122	kassette	kaseta	26	3.26923	1.97094	1.23077	0.651625	1.76923	1.06987	1.30769	0.788377	1.23077	0.651625	12	2.83333	1.74946	1.25	0.866025	1.66667	0.984732	1.41667	0.996205	1.25	0.866025	14	3.64286	2.13423	1.21429	0.425815	1.85714	1.16732	1.21429	0.578934	1.21429	0.425815	1	H	none	H		unclassified
1119	kasino	kasyno	26	2.61538	1.94066	3.15385	2.11078	2.42308	1.8149	3.61538	2.02142	3.23077	2.21464	12	2.66667	2.01509	3.33333	2.18812	3	2.3355	4.08333	2.10878	3.41667	2.50303	14	2.57143	1.94992	3	2.11224	1.92857	1.07161	3.21429	1.92867	3.07143	2.01778	1	F	none	undifferentiated		unclassified
1123	kastanie	kasztan	26	4.07692	1.99846	1.26923	0.724303	1.57692	0.986836	1.26923	0.666795	1.26923	0.874423	11	4.45455	1.75292	1.09091	0.301511	1.63636	1.02691	1.18182	0.603023	1	0	15	3.8	2.17781	1.4	0.910259	1.53333	0.99043	1.33333	0.723747	1.46667	1.12546	1	H	H	H		unclassified
240	bahre	katafalk	26	1.5	1.06771	1.84615	1.54123	2.69231	1.93431	2.38462	1.91994	2.03846	1.82166	12	1.75	1.42223	1.91667	1.83196	2.75	1.95982	2.41667	1.78164	2.16667	1.85047	14	1.28571	0.61125	1.78571	1.3114	2.64286	1.98483	2.35714	2.09788	1.92857	1.85904	1	S	none	undifferentiated		unclassified
41	absturz	katastrofa	27	1.03704	0.19245	3.59259	2.06173	5.11111	1.96769	5.33333	2.0755	2.7037	2.16288	14	1.07143	0.267261	4.14286	2.10703	5.92857	1.63915	5.92857	2.01778	3	2.2188	13	1	0	3	1.91485	4.23077	1.96443	4.69231	2.01596	2.38462	2.14237	1	F	none	blended	FS	unclassified
990	henker	katować	26	1.11538	0.431455	4.88462	1.50537	4.65385	1.91713	5.23077	1.39449	5.23077	1.5826	12	1.16667	0.57735	5.25	1.3568	5.75	1.13818	5.66667	0.984732	5.83333	1.02986	14	1.07143	0.267261	4.57143	1.60357	3.71429	1.9779	4.85714	1.61041	4.71429	1.81568	1	none	none	undifferentiated		unclassified
1463	marter	katusze	26	1.07692	0.271746	3.69231	2.09321	4.26923	2.03091	4.69231	1.99538	3.84615	2.18527	14	1	0	3.14286	1.9945	4.64286	2.13423	4.71429	2.09132	3.57143	2.24343	12	1.16667	0.389249	4.33333	2.10339	3.83333	1.89896	4.66667	1.96946	4.16667	2.16725	1	F	none	undifferentiated		unclassified
1087	kaffee	kawa	26	4.34615	2.07735	1.26923	0.666795	1.38462	0.941357	1.34615	0.745241	1.53846	1.42073	15	5.06667	1.98086	1.26667	0.703732	1.13333	0.516398	1.2	0.414039	1	0	11	3.36364	1.85864	1.27273	0.64667	1.72727	1.27208	1.54545	1.03573	2.27273	2.00454	1	H	H	H		unclassified
1561	mokka	kawowy	26	4.07692	1.89574	1.38462	0.752432	1.15385	0.464095	1.07692	0.271746	1.34615	0.977438	15	4.4	2.02837	1.46667	0.915475	1.06667	0.258199	1.06667	0.258199	1	0	11	3.63636	1.68954	1.27273	0.467099	1.27273	0.64667	1.09091	0.301511	1.81818	1.4013	1	H	H	H		unclassified
1851	predigen	kazanie	26	1.5	1.06771	3.76923	1.98611	2.15385	1.75937	2.23077	1.7276	2.69231	2.13109	12	2.08333	1.37895	3.08333	1.1645	2.16667	1.4668	2	1.3484	2.08333	1.67649	14	1	0	4.35714	2.37316	2.14286	2.0327	2.42857	2.02729	3.21429	2.39161		A	none	undifferentiated		A
2392	tatort	kaźń	26	1.07692	0.271746	3.30769	2.36253	3.65385	2.44855	4.15385	2.37811	3.80769	2.43342	11	1.09091	0.301511	3.90909	2.62505	4.18182	2.7136	4.27273	2.53341	4.18182	2.48267	15	1.06667	0.258199	2.86667	2.13363	3.26667	2.25093	4.06667	2.34419	3.53333	2.4456	1	F	none	undifferentiated		unclassified
423	brause	kąpielowy	26	3.42308	2.11987	1.34615	0.745241	1.61538	1.13409	1.53846	1.06699	1.38462	0.752432	15	3.53333	2.03072	1.33333	0.723747	1.4	0.828079	1.6	1.12122	1.13333	0.351866	11	3.27273	2.3277	1.36364	0.80904	1.90909	1.446	1.45455	1.03573	1.72727	1.00905	1	H	none	H		unclassified
476	daumen	kciuk	26	2.5	1.81659	1.34615	0.745241	1.38462	0.941357	1.53846	1.33359	1.65385	1.38397	13	2.76923	2.0064	1.15385	0.375534	1.23077	0.599145	1.69231	1.54837	1.07692	0.27735	13	2.23077	1.64083	1.53846	0.967418	1.53846	1.19829	1.38462	1.1209	2.23077	1.7867	1	H	none	undifferentiated		N
1151	kitsch	kicz	27	1.85185	1.2921	2.92593	1.97924	1.62963	1.21365	1.33333	0.784465	2.96296	1.698	14	1.5	0.94054	2.5	1.9115	1.57143	1.39859	1.42857	0.937614	2.64286	1.49908	13	2.23077	1.5359	3.38462	2.02231	1.69231	1.03155	1.23077	0.599145	3.30769	1.88788	1	D	none	blended	DA	unclassified
2823	wurst	kiełbasa	26	2.73077	1.90909	1.73077	1.48479	1.61538	1.35873	1.42308	1.06482	2.11538	1.79615	15	2.06667	1.62422	1.53333	1.30201	1.53333	1.35576	1.53333	1.30201	2.4	2.02837	11	3.63636	1.9633	2	1.73205	1.72727	1.42063	1.27273	0.64667	1.72727	1.42063	1	H	none	undifferentiated		unclassified
1516	mies	kiepski	26	1.11538	0.325813	3.76923	2.00614	3.38462	2.04112	2.57692	1.77027	3	1.93907	12	1	0	4.25	1.76455	3.25	2.09436	2.83333	2.03753	2.75	1.28806	14	1.21429	0.425815	3.35714	2.16997	3.5	2.06621	2.35714	1.54955	3.21429	2.39161		A	none	undifferentiated		unclassified
1972	richten	kierować	26	4.5	1.90263	1.69231	1.01071	1.65385	0.93562	2.57692	1.55366	1.30769	1.04954	14	3.57143	1.78516	1.71429	1.13873	1.57143	1.01635	2.78571	1.76193	1.21429	0.578934	12	5.58333	1.44338	1.66667	0.887625	1.75	0.866025	2.33333	1.30268	1.41667	1.44338		H	H	H		unclassified
678	fahrer	kierowca	26	3.65385	2.31417	2.42308	1.67745	1.88462	1.17735	3.38462	1.91994	1.57692	1.06482	12	3.66667	2.26969	2.41667	1.83196	1.91667	1.08362	3.5	2.19504	1.66667	1.23091	14	3.64286	2.43712	2.42857	1.60357	1.85714	1.29241	3.28571	1.72888	1.5	0.94054	1	H	none	undifferentiated		unclassified
1321	lenkrad	kierownica	26	2.76923	1.98611	1.42308	0.986836	1.5	1.14018	2.03846	1.53573	1.15385	0.367946	11	2.27273	2.19504	1.45455	1.21356	1.81818	1.47093	2.36364	1.62928	1.09091	0.301511	15	3.13333	1.80739	1.4	0.828079	1.26667	0.798809	1.8	1.47358	1.2	0.414039	1	H	none	undifferentiated		N
1314	leiter	kierownik	26	2.76923	1.96586	2.80769	1.72091	2.42308	1.57919	3.03846	1.79957	2.15385	1.48842	14	2.57143	2.17377	2.42857	1.91007	1.92857	1.73046	2.71429	1.89852	1.85714	1.51186	12	3	1.7581	3.25	1.42223	3	1.20605	3.41667	1.67649	2.5	1.446	1	F	none	undifferentiated		unclassified
1146	kiosk	kiosk	27	2.18519	1.46857	1.55556	1.01274	1.51852	0.935224	1.37037	0.883531	1.48148	0.935224	14	2.42857	1.39859	1.64286	0.928783	1.78571	0.974961	1.64286	1.15073	1.78571	1.12171	13	1.92308	1.5525	1.46154	1.1266	1.23077	0.83205	1.07692	0.27735	1.15385	0.5547	1	H	none	undifferentiated		N
2353	stute	klacz	26	3.38462	2.11805	1.11538	0.325813	1.19231	0.567044	1.61538	1.20256	1.19231	0.491466	13	4.38462	2.02231	1.15385	0.375534	1.23077	0.599145	2.07692	1.49786	1.38462	0.650444	13	2.38462	1.75777	1.07692	0.27735	1.15385	0.5547	1.15385	0.5547	1	0	1	H	none	H		unclassified
1042	hupe	klakson	26	1.69231	1.19228	3.80769	2.03998	1.73077	1.28243	2.69231	2.05464	2.30769	1.78369	12	1.91667	1.62135	2.91667	1.78164	1.5	1.24316	2.16667	1.64225	1.41667	0.900337	14	1.5	0.650444	4.57143	1.98898	1.92857	1.32806	3.14286	2.31574	3.07143	2.01778	1	A	none	undifferentiated		A
1168	klinke	klamka	27	1.62963	1.14852	1.40741	1.04731	1.2963	0.6688	2.03704	1.7205	1.18519	0.395847	14	1.92857	1.32806	1.14286	0.363137	1	0	1.85714	1.46009	1.07143	0.267261	13	1.30769	0.85485	1.69231	1.4367	1.61538	0.869718	2.23077	2.0064	1.30769	0.480384	1	F	none	undifferentiated		N
1156	klasse	klasa	26	3.46154	2.1768	1.96154	1.39945	1.96154	1.48272	2.07692	1.87453	1.5	1.14018	15	2.8	2.17781	2.26667	1.48645	2.4	1.80476	2.46667	2.06559	1.8	1.42428	11	4.36364	1.91169	1.54545	1.21356	1.36364	0.504525	1.54545	1.50756	1.09091	0.301511	1	H	none	H		unclassified
1157	klassik	klasyczny	26	3.30769	2.03508	1.61538	1.23538	1.88462	1.47856	1.53846	1.20767	1.46154	1.20767	12	3.5	2.11058	1.41667	0.996205	2.08333	1.83196	1.33333	0.887625	1.25	0.866025	14	3.14286	2.0327	1.78571	1.42389	1.71429	1.13873	1.71429	1.43734	1.64286	1.44686	1	H	none	H		unclassified
1171	kloster	klasztor	26	2.19231	1.20064	1.5	0.989949	2.53846	1.81617	1.88462	1.36607	1.53846	0.811456	13	2.30769	1.18213	1.23077	0.599145	2.53846	2.06621	1.53846	0.967418	1.30769	0.630425	13	2.07692	1.25576	1.76923	1.23517	2.53846	1.61325	2.23077	1.64083	1.76923	0.926809	1	S	none	undifferentiated		S
1088	käfig	klatka	26	1.30769	0.549125	3.26923	2.1828	3.5	2.26716	4	2.07846	3.03846	2.21776	11	1.18182	0.40452	3.36364	2.50091	4.18182	2.18258	4.81818	1.77866	2.90909	2.0226	15	1.4	0.632456	3.2	2.00713	3	2.26779	3.4	2.1314	3.13333	2.41622	1	F	none	undifferentiated		unclassified
1308	leim	klej	26	2.15385	1.59229	1.84615	1.25514	1.42308	0.808608	2.03846	1.39945	2.07692	1.26248	15	1.93333	1.57963	1.6	0.828079	1.26667	0.593617	2.2	1.37321	1.73333	0.96115	11	2.45455	1.63485	2.18182	1.66242	1.63636	1.02691	1.81818	1.47093	2.54545	1.50756	1	H	none	undifferentiated		unclassified
1084	juwel	klejnot	26	4.96154	1.77721	1.30769	0.735893	1.53846	1.17408	1.46154	1.17408	1.11538	0.431455	15	4.8	1.97122	1.33333	0.617213	1.6	1.29835	1.46667	1.30201	1.06667	0.258199	11	5.18182	1.53741	1.27273	0.904534	1.45455	1.03573	1.45455	1.03573	1.18182	0.603023	1	H	H	H		unclassified
1251	kunde	klient	26	2.69231	1.69161	2.80769	1.95998	1.96154	1.70835	2.53846	1.85969	2.15385	1.84808	12	3.16667	1.89896	2.91667	1.92865	2.08333	1.83196	2.5	2.0226	2.33333	1.87487	14	2.28571	1.43734	2.71429	2.05421	1.85714	1.65748	2.57143	1.78516	2	1.88108	1	A	none	undifferentiated		unclassified
1164	klima	klimatyczny	26	4.38462	2.02142	1.34615	1.01754	1.76923	1.63236	1.65385	1.52164	1.23077	0.710363	12	5.16667	1.85047	1.16667	0.389249	1.66667	1.72328	1.58333	1.44338	1.08333	0.288675	14	3.71429	1.9779	1.5	1.3445	1.85714	1.61041	1.71429	1.63747	1.35714	0.928783	1	H	H	H		unclassified
1167	klinik	klinika	27	2.40741	1.75979	1.96296	1.60484	3.40741	2.22329	3.92593	1.75249	2.48148	1.98785	14	2.57143	2.06488	1.92857	1.77436	4.14286	2.34872	4.42857	2.1018	2.85714	2.10703	13	2.23077	1.42325	2	1.47196	2.61538	1.85016	3.38462	1.1209	2.07692	1.84669	1	F	none	undifferentiated		unclassified
70	ahorn	klon	26	1.88462	1.45126	1.57692	1.13747	2.03846	1.42775	2.46154	2.13973	2.07692	1.99846	12	1.66667	1.07309	1.41667	0.900337	1.41667	0.668558	2.33333	1.92275	1.58333	1.1645	14	2.07143	1.73046	1.71429	1.32599	2.57143	1.6968	2.57143	2.37663	2.5	2.47293	1	F	none	undifferentiated		unclassified
2294	steg	kładka	26	3.07692	1.74179	1.38462	0.941357	1.19231	0.491466	2.38462	1.72225	1.38462	0.752432	11	3	1.78885	1	0	1	0	2.36364	2.01359	1.09091	0.301511	15	3.13333	1.76743	1.66667	1.17514	1.33333	0.617213	2.4	1.54919	1.6	0.910259	1	H	none	blended	HF	unclassified
1556	mogeln	kłamać	26	1.65385	1.19808	4.61538	1.6267	3.88462	2.00653	3.84615	2.03356	4.30769	2.11224	13	1.84615	1.21423	4.46154	1.89804	4.23077	2.35067	4.38462	2.2188	3.76923	2.31495	13	1.46154	1.19829	4.76923	1.36344	3.53846	1.61325	3.30769	1.75046	4.84615	1.81871		A	none	undifferentiated		unclassified
1403	lüge	kłamstwo	26	1.26923	0.961569	4.23077	1.50486	3.92308	1.87453	3.80769	1.87658	4.5	1.81659	12	1	0	4.08333	1.31137	3.83333	1.52753	3.33333	1.557	3.75	0.866025	14	1.5	1.28602	4.35714	1.69193	4	2.18386	4.21429	2.08211	5.14286	2.17882	1	D	none	undifferentiated		unclassified
1293	legen	kłaść	26	2.65385	1.83177	1.5	0.948683	1.73077	1.18516	1.57692	1.13747	1.23077	0.58704	14	2	1.41421	1.5	1.01905	1.57143	1.15787	1.42857	1.15787	1.21429	0.578934	12	3.41667	2.02073	1.5	0.904534	1.91667	1.24011	1.75	1.13818	1.25	0.621582		H	none	undifferentiated		N
2834	zank	kłótnia	26	1.30769	0.735893	5.11538	1.55761	4.11538	1.98649	3.84615	1.84808	2.57692	1.92194	12	1.41667	0.668558	4.83333	1.2673	3.83333	1.58592	3.41667	1.37895	1.83333	1.33712	14	1.21429	0.801784	5.35714	1.78054	4.35714	2.30742	4.21429	2.15473	3.21429	2.15473	1	A	none	blended	ASF	unclassified
2293	stechen	kłuć	26	1.53846	0.859338	2.65385	1.71912	2.07692	1.49461	3.57692	1.77027	2.88462	2.30351	12	1.66667	0.778499	2.83333	1.58592	2.16667	1.64225	3.58333	1.62135	2.16667	1.80067	14	1.42857	0.937614	2.5	1.87083	2	1.41421	3.57143	1.94992	3.5	2.56455		F	none	undifferentiated		F
1177	kneipe	knajpa	26	3.80769	1.72091	1.46154	0.811456	1.53846	0.859338	2.03846	1.34107	1.92308	1.19743	15	3.93333	1.94447	1.4	0.736788	1.66667	0.9759	2.2	1.14642	1.86667	1.30201	11	3.63636	1.43337	1.54545	0.934199	1.36364	0.6742	1.81818	1.60114	2	1.09545	1	H	H	H		unclassified
1175	knebel	knebel	26	1.61538	1.26734	3.53846	2.10201	2.92308	1.76461	4.46154	2.15835	3.23077	2.30318	13	1.69231	1.49358	3.76923	2.24179	3	1.73205	5.23077	2.24179	3.53846	2.60177	13	1.53846	1.05003	3.30769	2.01596	2.84615	1.86396	3.69231	1.84321	2.92308	2.01914	1	F	none	undifferentiated		unclassified
1176	knebeln	kneblować	26	1.30769	0.837579	4.38462	1.87781	3.5	2.0445	5.11538	1.65715	3.80769	1.98029	14	1.35714	1.08182	4.42857	2.13809	3.5	2.06621	5.14286	1.83375	3.71429	2.1989	12	1.25	0.452267	4.33333	1.61433	3.5	2.11058	5.08333	1.50504	3.91667	1.78164		F	none	undifferentiated		unclassified
1180	koalition	koalicyjny	26	2.5	1.36382	2.15385	1.64176	1.26923	0.533494	2.15385	1.56697	1.69231	1.19228	13	2.46154	1.26592	1.92308	1.75412	1.23077	0.438529	2.30769	1.70219	1.30769	0.630425	13	2.53846	1.5064	2.38462	1.55662	1.30769	0.630425	2	1.47196	2.07692	1.49786		H	none	undifferentiated		unclassified
776	fraulich	kobiecy	27	4.25926	2.04925	1.66667	1.35873	1.59259	1.2788	1.66667	1.44115	1.40741	1.18514	14	5.5	1.60528	1.64286	1.08182	1.42857	0.755929	1.5	1.01905	1.21429	0.425815	13	2.92308	1.60528	1.69231	1.6525	1.76923	1.69085	1.84615	1.81871	1.61538	1.66024		H	H	H		unclassified
774	frau	kobieta	26	5.07692	1.87453	1.92308	1.71868	2.26923	1.88802	2.19231	2.0595	1.5	1.42127	12	5.16667	1.89896	1.83333	1.85047	1.75	1.3568	1.91667	1.97523	1.41667	1.1645	14	5	1.92154	2	1.6641	2.71429	2.1989	2.42857	2.17377	1.57143	1.65084	1	H	H	H		unclassified
1182	kobra	kobra	27	1.77778	1.28103	2.07407	1.66239	1.7037	1.35348	3.7037	2.25004	3.33333	2.01914	14	2.14286	1.65748	2.5	1.95133	2.07143	1.63915	4.35714	2.30742	4.28571	2.12779	13	1.38462	0.50637	1.61538	1.19293	1.30769	0.85485	3	2.04124	2.30769	1.31559	1	F	none	blended	FD	unclassified
1350	lieben	kochać	52	6.59615	0.747797	1.92308	1.47988	2.73077	1.87988	3.15385	1.86174	1.30769	0.960769	27	6.55556	0.847319	1.92593	1.46566	3.11111	2.02548	3.07407	1.93998	1.22222	0.423659	25	6.64	0.637704	1.92	1.52534	2.32	1.65126	3.24	1.80924	1.4	1.32288		H	H	H		unclassified
1341	liaison	kochanek	27	3.14815	2.2821	2.81481	1.94218	3	2.05688	3.33333	2.11224	2.44444	1.9282	14	3.85714	2.34872	2.92857	2.01778	3.14286	2.0702	3.78571	2.35922	2.07143	1.38477	13	2.38462	2.02231	2.69231	1.93152	2.84615	2.11527	2.84615	1.77229	2.84615	2.37508	1	F	none	undifferentiated		unclassified
858	geliebte	kochanka	27	2.7037	2.05342	3.7037	2.25004	3.48148	2.24243	3.07407	2.16486	3.25926	2.14104	14	2.28571	2.05421	4.57143	2.31099	4.07143	2.49505	4.07143	2.33582	3.64286	2.20514	13	3.15385	2.03495	2.76923	1.83275	2.84615	1.81871	2	1.35401	2.84615	2.0755	1	A	none	undifferentiated		unclassified
1347	lieb	kochany	26	5.96154	1.42775	1.30769	1.19228	1.42308	0.986836	1.65385	1.52164	1.11538	0.325813	12	6.25	0.965307	1.58333	1.72986	1.5	1.16775	1.75	1.71226	1.25	0.452267	14	5.71429	1.72888	1.07143	0.267261	1.35714	0.841897	1.57143	1.39859	1	0		H	H	H		H
950	hahn	kogut	26	1.88462	1.39505	1.34615	0.845804	1.34615	0.977438	1.76923	1.2746	1.69231	1.15825	12	2.25	1.48477	1.66667	1.1547	1.41667	0.900337	2.25	1.54479	1.83333	1.33712	14	1.57143	1.28388	1.07143	0.267261	1.28571	1.06904	1.35714	0.841897	1.57143	1.01635	1	H	none	undifferentiated		N
2581	vaterland	kolebka	27	2.74074	1.97275	1.48148	0.975483	1.44444	0.974022	1.14815	0.456045	1.2963	0.868899	14	2.35714	2.02322	1.5	1.16024	1.35714	0.928783	1.14286	0.534522	1.14286	0.534522	13	3.15385	1.90815	1.46154	0.77625	1.53846	1.05003	1.15385	0.375534	1.46154	1.1266		H	none	H		N
1187	kollege	kolega	26	4.96154	1.39945	1.61538	0.941357	1.42308	0.702742	1.5	0.707107	1.19231	0.633671	14	4.92857	1.43925	1.64286	1.15073	1.35714	0.744946	1.42857	0.755929	1.07143	0.267261	12	5	1.41421	1.58333	0.668558	1.5	0.6742	1.58333	0.668558	1.33333	0.887625	1	H	H	H		unclassified
144	anstehen	kolejka	26	2	1.41421	3.73077	2.20105	2.76923	2.21464	2.11538	1.90425	2.30769	1.95488	11	1.72727	1.00905	4.45455	2.11488	3.09091	2.3002	2.54545	2.16165	2.45455	1.96792	15	2.2	1.65616	3.2	2.17781	2.53333	2.19957	1.8	1.69874	2.2	2.00713		A	none	undifferentiated		unclassified
689	farbe	kolor	26	4.03846	1.98959	1.23077	0.58704	1.30769	0.735893	1.11538	0.325813	1.15385	0.367946	12	4.41667	1.88092	1.16667	0.57735	1.08333	0.288675	1.08333	0.288675	1.16667	0.389249	14	3.71429	2.09132	1.28571	0.61125	1.5	0.94054	1.14286	0.363137	1.14286	0.363137	1	H	H	H		unclassified
449	bunt	kolorowy	27	5.22222	1.64862	1.37037	1.04323	1.37037	1.18153	1.33333	1.03775	1.2963	1.17063	14	5.78571	1.3114	1.28571	0.61125	1.21429	0.425815	1.21429	0.578934	1.07143	0.267261	13	4.61538	1.80455	1.46154	1.39137	1.53846	1.6641	1.46154	1.39137	1.53846	1.6641		H	H	H		H
1229	kreis	koło	26	2.80769	2.11696	1.65385	1.38397	1.57692	1.39063	1.80769	1.47022	1.34615	1.29437	11	2.63636	1.68954	1.63636	1.20605	1.72727	1.19087	1.63636	1.20605	1.27273	0.904534	15	2.93333	2.43389	1.66667	1.54303	1.46667	1.55226	1.93333	1.66762	1.4	1.54919	1	H	none	undifferentiated		unclassified
2792	wippe	kołysać	27	3.55556	2.02548	1.48148	1.01414	1.77778	1.08604	1.92593	1.61545	1.62963	1.27545	14	3.92857	2.1649	1.5	1.28602	1.57143	1.15787	1.92857	1.85904	1.85714	1.56191	13	3.15385	1.86396	1.46154	0.660225	2	1	1.92308	1.38212	1.38462	0.869718	1	H	none	H		unclassified
2785	wiege	kołyska	27	4.25926	2.04925	1.66667	0.919866	1.66667	0.877058	1.96296	1.31505	1.55556	1.01274	14	4.57143	2.02729	2	1.03775	2	0.960769	2.07143	1.32806	1.71429	1.13873	13	3.92308	2.10006	1.30769	0.630425	1.30769	0.630425	1.84615	1.3445	1.38462	0.869718	1	H	H	H		unclassified
1588	moskito	komar	26	1.19231	0.491466	4.76923	2.02599	1.57692	1.06482	2.03846	1.42775	3.96154	1.98959	12	1.16667	0.57735	4.16667	1.99241	1.5	1.16775	2.16667	1.64225	4.16667	1.94625	14	1.21429	0.425815	5.28571	1.9779	1.64286	1.00821	1.92857	1.26881	3.78571	2.08211	1	A	none	blended	AD	A
1189	komet	kometa	27	3.7037	1.87729	1.37037	0.791695	1.44444	0.800641	1.96296	1.15962	1.25926	0.712125	14	4.5	1.60528	1.42857	0.755929	1.5	0.759555	2	1.03775	1.21429	0.578934	13	2.84615	1.81871	1.30769	0.85485	1.38462	0.869718	1.92308	1.32045	1.30769	0.85485	1	H	none	H		unclassified
1190	komfort	komfort	27	5.51852	1.626	1.14815	0.456045	1.18519	0.483341	1.22222	0.640513	1.2963	0.953327	14	6.07143	1.20667	1.07143	0.267261	1.14286	0.363137	1.07143	0.267261	1.07143	0.267261	13	4.92308	1.84669	1.23077	0.599145	1.23077	0.599145	1.38462	0.869718	1.53846	1.33012	1	H	H	H		H
1192	komisch	komiczny	26	4.53846	2.02447	2.15385	1.75937	2.07692	1.52113	1.65385	1.09334	1.46154	0.904689	15	4.26667	2.0166	1.93333	1.33452	1.93333	1.48645	1.33333	0.617213	1.4	0.828079	11	4.90909	2.07145	2.45455	2.25227	2.27273	1.61808	2.09091	1.446	1.54545	1.03573		H	H	H		unclassified
1096	kamin	kominek	26	4.92308	1.54721	1.26923	0.666795	2.07692	1.59808	1.76923	1.24283	1.19231	0.567044	13	5	1.73205	1.15385	0.375534	2.30769	1.88788	2	1.52753	1	0	13	4.84615	1.40512	1.38462	0.869718	1.84615	1.28103	1.53846	0.877058	1.38462	0.767948	1	H	H	H		unclassified
1196	kommission	komisja	26	1.84615	1.08415	2.61538	1.81278	2.26923	1.5889	3.69231	1.84974	1.76923	1.1422	14	1.71429	1.20439	2.57143	1.86936	1.71429	1.13873	3.42857	1.91007	1.5	0.85485	12	2	0.953463	2.66667	1.82574	2.91667	1.83196	4	1.80907	2.08333	1.37895		F	none	undifferentiated		F
1193	komitee	komitet	26	1.96154	1.3109	2.34615	1.95841	1.80769	1.52366	2.19231	1.744	2.30769	1.95488	11	1.90909	1.13618	2.36364	1.80404	1.90909	1.3751	2.36364	1.80404	2.27273	1.90215	15	2	1.46385	2.33333	2.12692	1.73333	1.66762	2.06667	1.75119	2.33333	2.05866	1	A	none	undifferentiated		unclassified
1191	komik	komizm	27	4.33333	1.90142	1.74074	1.19591	1.40741	0.797074	1.40741	0.843949	1.2963	0.724028	14	4.42857	2.1018	1.57143	0.937614	1.42857	0.937614	1.21429	0.425815	1.14286	0.363137	13	4.23077	1.73944	1.92308	1.44115	1.38462	0.650444	1.61538	1.1209	1.46154	0.967418	1	H	H	H		unclassified
1197	kommode	komoda	27	2.22222	1.60128	1.51852	0.975483	1.51852	0.893152	1.7037	1.06752	1.48148	1.01414	14	2.92857	1.8172	1.78571	1.0509	1.85714	1.02711	2.07143	1.14114	1.85714	1.29241	13	1.46154	0.877058	1.23077	0.83205	1.15385	0.5547	1.30769	0.85485	1.07692	0.27735	1	H	none	undifferentiated		N
1250	kumpan	kompan	26	4.76923	1.7276	1.46154	1.10384	1.5	1.10454	1.5	1.10454	1.11538	0.588348	11	4.63636	1.85864	1.54545	1.21356	1.54545	1.29334	1.45455	1.21356	1	0	15	4.86667	1.68466	1.4	1.0556	1.46667	0.99043	1.53333	1.0601	1.2	0.774597	1	H	H	H		unclassified
1199	kompass	kompas	26	3	1.78885	1.34615	0.977438	1.26923	0.724303	2.03846	1.53573	1.26923	0.724303	12	3.08333	1.72986	1.33333	0.887625	1.33333	0.887625	1.91667	1.62135	1.25	0.866025	14	2.92857	1.89997	1.35714	1.08182	1.21429	0.578934	2.14286	1.51186	1.28571	0.61125	1	H	none	undifferentiated		unclassified
396	blamage	kompromitujący	26	1.11538	0.431455	4.69231	2.01533	4.96154	1.75455	4.69231	2.03508	4.23077	2.1965	15	1.13333	0.516398	4.93333	2.0166	5.46667	1.59762	5	2	4.4	2.1314	11	1.09091	0.301511	4.36364	2.06265	4.27273	1.79393	4.27273	2.10195	4	2.36643	1	S	none	undifferentiated		unclassified
1198	kommunist	komunistyczny	26	1.5	1.2083	4.38462	2.2817	3.73077	2.49091	3.76923	2.43816	4.23077	2.53468	11	1.09091	0.301511	5.09091	2.21154	4.45455	2.58316	4.81818	2.22792	5.09091	2.34327	15	1.8	1.52128	3.86667	2.26358	3.2	2.36643	3	2.36039	3.6	2.5579		A	none	undifferentiated		unclassified
560	eingehen	konać	26	1.46154	1.17408	3.15385	1.97367	4.88462	2.19685	4.76923	2.26817	3.34615	2.33139	15	1.4	0.910259	3	1.69031	4.93333	2.25093	4.53333	2.41622	2.93333	2.1202	11	1.54545	1.50756	3.36364	2.37793	4.81818	2.22792	5.09091	2.11918	3.90909	2.58668		S	none	undifferentiated		unclassified
901	giftgas	koncentracyjny	54	1.59259	1.40778	3.62963	2.33348	4.33333	2.48011	4.22222	2.37651	4.03704	2.41819	28	1.71429	1.51186	3.78571	2.37825	4.5	2.50185	4.5	2.47207	4.17857	2.41988	26	1.46154	1.30325	3.46154	2.31915	4.15385	2.49307	3.92308	2.279	3.88462	2.45482	1	S	none	undifferentiated		unclassified
1211	konzert	koncert	26	5.19231	1.95998	1.42308	0.808608	1.65385	1.19808	1.73077	1.21845	1.42308	0.808608	12	5.58333	2.23437	1.16667	0.57735	1.5	1	1.25	0.621582	1.16667	0.57735	14	4.85714	1.70326	1.64286	0.928783	1.78571	1.3688	2.14286	1.46009	1.64286	0.928783	1	H	H	H		unclassified
314	beileid	kondolencje	27	1.40741	1.21716	2.74074	1.8312	5.7037	1.65981	3.88889	2.326	2.22222	1.62512	14	1.5	1.3445	3.21429	2.08211	6.14286	1.40642	4.42857	2.37663	2.78571	1.62569	13	1.30769	1.1094	2.23077	1.42325	5.23077	1.83275	3.30769	2.21302	1.61538	1.44559	1	S	S	S		S
1203	konflikt	konflikt	26	1.15385	0.612686	4.53846	1.92314	4.76923	1.68066	4.65385	1.99885	3.38462	1.91994	15	1.06667	0.258199	4.73333	2.05171	5.33333	1.49603	5.06667	1.90738	3.06667	1.70992	11	1.27273	0.904534	4.27273	1.79393	4	1.67332	4.09091	2.07145	3.81818	2.18258	1	S	none	undifferentiated		unclassified
1991	rotwein	koniak	27	3.07407	1.97924	1.81481	1.59415	1.92593	1.51723	1.81481	1.52005	2.55556	1.98714	14	3	2.14834	1.85714	1.74784	2	1.7097	2.07143	1.8172	2.92857	2.40078	13	3.15385	1.86396	1.76923	1.48064	1.84615	1.3445	1.53846	1.1266	2.15385	1.40512	1	H	none	undifferentiated		unclassified
1161	klee	koniczyna	26	4.73077	2.01112	1.07692	0.271746	1.03846	0.196116	1	0	1	0	12	5.25	1.48477	1.08333	0.288675	1.08333	0.288675	1	0	1	0	14	4.28571	2.33464	1.07143	0.267261	1	0	1	0	1	0	1	H	H	H		H
588	ende	koniec	27	2.88889	1.88788	2.11111	1.84669	3	2.11224	3.07407	2.2001	1.33333	1	14	3.28571	1.9779	2.28571	1.93862	3.64286	2.13423	3.92857	2.1649	1.57143	1.34246	13	2.46154	1.76141	1.92308	1.801	2.30769	1.93152	2.15385	1.90815	1.07692	0.27735	1	F	none	undifferentiated		unclassified
1204	konkurrenz	konkurencyjny	26	2.23077	1.63236	3.5	1.72627	2.19231	1.20064	3.19231	1.54969	2.34615	1.59856	14	2.14286	1.74784	3.64286	1.78054	2	1.1094	3.35714	1.54955	2.07143	1.89997	12	2.33333	1.557	3.33333	1.72328	2.41667	1.31137	3	1.59545	2.66667	1.1547		A	none	undifferentiated		unclassified
959	hanf	konopie	27	3.2963	2.21559	2	1.49358	2.11111	1.62512	2.11111	1.52753	2.11111	1.69464	14	2.35714	1.90575	1.78571	1.57766	1.92857	1.59153	2.5	1.82925	2.57143	2.06488	13	4.30769	2.13638	2.23077	1.42325	2.30769	1.70219	1.69231	1.03155	1.61538	1.04391	1	H	none	undifferentiated		unclassified
1207	konsequenz	konsekwentny	26	4.34615	1.83177	1.57692	1.27037	1.61538	1.13409	2.23077	1.83973	1.42308	1.02657	13	4.30769	2.05688	1.53846	1.39137	1.61538	1.19293	2.69231	2.3939	1.38462	1.1209	13	4.38462	1.66024	1.61538	1.19293	1.61538	1.1209	1.76923	0.926809	1.46154	0.967418		H	H	H		unclassified
2606	verfassung	konstytucja	26	2.96154	1.88639	1.73077	1.15092	1.76923	1.24283	2.07692	1.23038	1.5	0.905539	15	3.06667	1.86956	1.66667	1.1127	1.46667	1.12546	1.93333	1.2228	1.33333	0.723747	11	2.81818	1.99089	1.81818	1.25045	2.18182	1.32802	2.27273	1.27208	1.72727	1.10371		H	none	undifferentiated		unclassified
2670	verzehr	konsumpcyjny	26	2.11538	1.58308	2.92308	2.18949	2.38462	1.96116	2.34615	2.05801	2.96154	2.18139	12	2	1.53741	3	2.17423	2.58333	1.92865	2.75	2.30119	3.66667	2.34844	14	2.21429	1.67233	2.85714	2.28228	2.21429	2.04483	2	1.83973	2.35714	1.90575	1	D	none	undifferentiated		unclassified
1208	kontakt	kontakt	26	3.84615	1.93271	1.61538	1.29852	1.57692	1.23849	2.69231	1.93431	1.34615	1.19808	13	4.61538	1.93815	1.92308	1.65638	1.84615	1.51911	2.61538	2.06311	1.15385	0.375534	13	3.07692	1.65638	1.30769	0.751068	1.30769	0.85485	2.76923	1.87767	1.53846	1.6641	1	H	none	undifferentiated		unclassified
1209	konto	konto	26	3.03846	1.96938	1.96154	1.07632	1.53846	0.989172	2.57692	1.50128	1.19231	0.491466	15	2.4	1.45406	2	1.13389	1.66667	1.04654	2.86667	1.59762	1.2	0.560612	11	3.90909	2.3002	1.90909	1.04447	1.36364	0.924416	2.18182	1.32802	1.18182	0.40452	1	H	none	undifferentiated		unclassified
1210	kontrolle	kontrolować	26	2.53846	1.65483	3.57692	2.15728	3	1.78885	2.92308	1.97834	2.46154	1.58065	14	2.78571	1.96815	3.71429	2.05421	2.78571	1.76193	2.85714	2.21384	2.07143	1.54244	12	2.25	1.21543	3.41667	2.35327	3.25	1.86474	3	1.7581	2.91667	1.56428		A	none	undifferentiated		unclassified
767	fortsetzen	kontynuować	26	3.34615	1.95841	1.73077	1.07917	1.69231	1.04954	2.07692	1.44009	1.30769	0.679366	11	3	1.67332	2	1.41421	1.72727	1.42063	1.81818	1.25045	1.27273	0.904534	15	3.6	2.16465	1.53333	0.743223	1.66667	0.723747	2.26667	1.57963	1.33333	0.48795		H	none	H		unclassified
1789	pferd	koń	26	3.84615	1.89087	1.19231	0.633671	1.42308	0.808608	1.84615	1.12044	1.34615	0.79711	12	4.16667	2.08167	1.16667	0.389249	1.5	0.6742	1.91667	1.24011	1.41667	0.996205	14	3.57143	1.74154	1.21429	0.801784	1.35714	0.928783	1.78571	1.0509	1.28571	0.61125	1	H	H	H		unclassified
589	enden	kończyć	26	3.30769	1.99538	2.19231	1.76679	3.53846	2.04413	3.53846	1.9643	1.26923	0.533494	14	2.85714	1.9945	2.14286	1.79131	3.71429	2.01642	3.92857	1.94004	1.21429	0.578934	12	3.83333	1.94625	2.25	1.81534	3.33333	2.14617	3.08333	1.97523	1.33333	0.492366		none	none	undifferentiated		unclassified
821	gebein	kończyna	26	2.96154	2.27122	1.46154	1.10384	1.57692	1.10175	1.92308	1.32433	1.88462	1.3062	11	3	2.56905	1.36364	0.924416	1.81818	1.16775	2	1.26491	1.90909	1.57826	15	2.93333	2.1202	1.53333	1.24595	1.4	1.0556	1.86667	1.40746	1.86667	1.12546	1	H	none	undifferentiated		unclassified
2843	zeche	kopalnia	26	2.11538	1.50537	1.15385	0.464095	1.69231	1.43581	3.19231	1.85514	1.61538	1.49872	12	1.58333	1.08362	1.16667	0.57735	1.25	0.866025	2.91667	1.44338	1.33333	0.887625	14	2.57143	1.6968	1.14286	0.363137	2.07143	1.73046	3.42857	2.17377	1.85714	1.87523	1	F	none	undifferentiated		F
239	bagger	koparka	26	2.26923	1.73338	1.42308	0.986836	1.73077	1.40165	1.84615	1.28662	1.57692	1.36156	15	2	1.77281	1.53333	1.18723	1.66667	1.29099	2	1.51186	1.53333	1.24595	11	2.63636	1.68954	1.27273	0.64667	1.81818	1.60114	1.63636	0.924416	1.63636	1.5667	1	H	none	undifferentiated		N
1213	kopie	kopia	26	1.76923	1.2746	2.42308	1.65343	1.84615	1.22286	1.80769	1.26552	1.80769	1.44275	15	1.46667	0.915475	2.4	1.59463	1.66667	0.899735	1.73333	1.16292	2	1.41421	11	2.18182	1.60114	2.45455	1.80907	2.09091	1.57826	1.90909	1.446	1.54545	1.50756	1	A	none	undifferentiated		unclassified
2490	tritt	kopniak	26	1.84615	1.37673	3.76923	1.81786	2.19231	1.54969	3	1.83303	2.5	2.0445	13	1.92308	1.70595	4.30769	1.84321	2.30769	1.60128	3.38462	1.89466	2.69231	2.09701	13	1.76923	1.01274	3.23077	1.69085	2.07692	1.5525	2.61538	1.75777	2.30769	2.05688	1	A	none	undifferentiated		A
1975	rinde	kora	26	3.19231	2.00038	1.30769	0.837579	1.38462	0.852147	1.19231	0.69393	1.19231	0.633671	13	3.46154	2.22169	1.07692	0.27735	1.15385	0.5547	1	0	1.15385	0.375534	13	2.92308	1.801	1.53846	1.1266	1.61538	1.04391	1.38462	0.960769	1.23077	0.83205	1	H	none	H		unclassified
1214	koran	Koran	26	1.92308	1.19743	2	1.72047	1.80769	1.47022	2.65385	1.97873	1.92308	1.89574	14	1.85714	1.23146	1.5	1.01905	1.35714	0.841897	2.21429	1.57766	1.42857	1.34246	12	2	1.20605	2.58333	2.19331	2.33333	1.87487	3.16667	2.329	2.5	2.31595	1	F	none	undifferentiated		unclassified
1239	krone	korona	26	3.84615	1.86959	1.53846	1.24035	1.5	0.860233	1.84615	1.48842	1.23077	0.710363	13	4.15385	1.57301	1.76923	1.64083	1.38462	0.869718	2.23077	1.96443	1.15385	0.5547	13	3.53846	2.14536	1.30769	0.630425	1.61538	0.869718	1.46154	0.660225	1.30769	0.85485	1	H	H	H		unclassified
1945	reigen	korowód	26	2	1.32665	1.76923	1.42289	1.84615	1.51505	2	1.76635	1.69231	1.28901	12	2.25	1.3568	1.5	0.797724	1.41667	0.792961	1.66667	1.23091	1.41667	0.996205	14	1.78571	1.3114	2	1.79743	2.21429	1.88837	2.28571	2.12779	1.92857	1.49174	1	none	none	undifferentiated		unclassified
98	amsel	kos	27	2.33333	1.73205	1.11111	0.423659	1.18519	0.622466	1.07407	0.26688	1.07407	0.3849	14	2.64286	2.02322	1.14286	0.534522	1.07143	0.267261	1.07143	0.267261	1	0	13	2	1.35401	1.07692	0.27735	1.30769	0.85485	1.07692	0.27735	1.15385	0.5547	1	H	none	H		N
2170	sense	kosa	27	1.55556	0.891556	2.37037	1.71303	1.96296	1.55617	3.62963	1.84283	1.96296	1.698	14	1.14286	0.363137	1.85714	1.61041	1.71429	1.43734	3.78571	1.67233	2.28571	1.89852	13	2	1.08012	2.92308	1.70595	2.23077	1.69085	3.46154	2.06621	1.61538	1.44559	1	F	none	F		F
1217	kosmetik	kosmetyczny	27	3.37037	1.88411	1.44444	0.9337	1.2963	0.724028	1.51852	0.935224	1.48148	0.893152	14	4.14286	2.0327	1.21429	0.578934	1.35714	0.841897	1.64286	1.08182	1.35714	0.928783	13	2.53846	1.33012	1.69231	1.18213	1.23077	0.599145	1.38462	0.767948	1.61538	0.869718	1	H	none	H		unclassified
2821	würfel	kostka	26	2.5	1.96469	1.30769	0.884047	1.23077	0.710363	1.38462	0.697247	1.38462	0.897861	12	2	1.70561	1.16667	0.57735	1.16667	0.57735	1.25	0.621582	1.16667	0.57735	14	2.92857	2.12908	1.42857	1.08941	1.28571	0.82542	1.5	0.759555	1.57143	1.08941	1	H	none	H		N
1215	korb	kosz	27	2.40741	1.71552	1.66667	1.07417	1.66667	1.24035	1.55556	1.01274	2.14815	1.19948	14	2.57143	1.65084	1.78571	1.18831	1.85714	1.51186	1.64286	1.08182	1.92857	0.916875	13	2.23077	1.83275	1.53846	0.967418	1.46154	0.877058	1.46154	0.967418	2.38462	1.44559	1	H	none	undifferentiated		unclassified
87	alptraum	koszmar	26	1.26923	1.00231	3.26923	2.20105	3.65385	2.07735	5.34615	1.6957	3.61538	2.40128	12	1.08333	0.288675	3	2.41209	3.33333	2.22928	5.5	1.62369	4	2.5937	14	1.42857	1.34246	3.5	2.06621	3.92857	1.97929	5.21429	1.80506	3.28571	2.26779	1	F	none	F		unclassified
1218	kosten	kosztować	27	2	1.33012	2.92593	1.81714	2.55556	1.78311	2.03704	1.22416	1.51852	1.12217	14	2.28571	1.38278	3.21429	1.96815	3.14286	2.14322	2.14286	1.29241	1.5	1.09193	13	1.69231	1.25064	2.61538	1.66024	1.92308	1.03775	1.92308	1.18754	1.53846	1.19829		A	none	undifferentiated		A
988	hemd	koszula	27	3.2963	2.18059	1.33333	0.679366	1.37037	0.791695	1.40741	0.930643	1.33333	0.733799	14	3.42857	2.13809	1.5	0.85485	1.71429	0.99449	1.57143	1.15787	1.5	0.85485	13	3.15385	2.30384	1.15385	0.375534	1	0	1.23077	0.599145	1.15385	0.5547	1	H	none	H		unclassified
1147	kirche	kościół	26	2.84615	1.8263	2.92308	1.89574	2.53846	1.98456	2.65385	1.89615	2.30769	1.8925	14	2.78571	1.84718	2.57143	1.82775	1.92857	1.54244	2.35714	1.64584	1.71429	0.913874	12	2.91667	1.88092	3.33333	1.96946	3.25	2.26134	3	2.17423	3	2.48633	1	A	none	undifferentiated		unclassified
1178	knochen	kość	26	1.92308	1.3542	1.38462	1.02282	1.5	0.948683	1.96154	1.56156	1.80769	1.16685	12	1.91667	1.1645	1.08333	0.288675	1.25	0.452267	1.75	1.21543	1.66667	0.984732	14	1.92857	1.54244	1.64286	1.33631	1.71429	1.20439	2.14286	1.83375	1.92857	1.32806	1	F	none	undifferentiated		N
1125	katze	kot	26	4.38462	2.2817	1.65385	0.977438	1.46154	1.24035	1.57692	1.23849	1.65385	1.19808	12	5.33333	1.96946	1.33333	0.887625	1.25	0.866025	1.33333	1.1547	1.33333	0.887625	14	3.57143	2.27746	1.92857	0.997249	1.64286	1.49908	1.78571	1.3114	1.92857	1.38477	1	H	H	H		unclassified
122	anker	kotwica	26	3.15385	1.93271	1.34615	0.745241	1.80769	1.35703	2.07692	1.32433	1.65385	1.41258	15	3.53333	2.06559	1.26667	0.457738	1.53333	1.0601	2.26667	1.2228	1.46667	0.743223	11	2.63636	1.68954	1.45455	1.03573	2.18182	1.66242	1.81818	1.47093	1.90909	2.0226	1	H	none	undifferentiated		unclassified
93	amboß	kowadło	26	2.30769	1.84974	1.46154	1.17408	1.42308	0.945434	1.69231	1.15825	1.30769	0.735893	12	1.83333	1.74946	1.33333	0.887625	1.41667	0.996205	1.91667	1.37895	1.33333	0.887625	14	2.71429	1.89852	1.57143	1.39859	1.42857	0.937614	1.5	0.94054	1.28571	0.61125	1	H	none	undifferentiated		N
2859	ziege	koza	27	2.59259	1.5995	1.44444	0.800641	1.55556	1.08604	1.88889	1.50214	1.88889	1.62512	14	2.28571	1.48989	1.42857	0.646206	1.57143	1.2225	2.21429	1.71772	1.5	1.16024	13	2.92308	1.70595	1.46154	0.967418	1.53846	0.967418	1.53846	1.19829	2.30769	1.97419	1	H	none	undifferentiated		unclassified
2314	stiefel	kozaki	26	2.19231	1.62528	2	1.72047	1.69231	1.40767	1.57692	1.20576	2.07692	1.69524	12	2.5	1.83402	2.58333	2.10878	2.08333	1.83196	1.41667	0.900337	2	1.59545	14	1.92857	1.43925	1.5	1.16024	1.35714	0.841897	1.71429	1.43734	2.14286	1.83375	1	H	none	undifferentiated		unclassified
864	gemse	kozica	26	3.76923	2.12241	1.11538	0.431455	1.19231	0.69393	1.5	0.812404	1.26923	0.827415	11	4.27273	2.3277	1	0	1.45455	1.03573	1.45455	0.8202	1	0	15	3.4	1.95667	1.2	0.560612	1	0	1.53333	0.833809	1.46667	1.0601	1	H	H	H		unclassified
2263	spott	kpić	27	1.44444	0.891556	5.14815	1.70302	3.44444	1.98714	2.96296	2.06587	3.33333	2.33699	14	1.21429	0.578934	5.5	1.40055	4.35714	1.82323	3.42857	2.13809	3.57143	2.53329	13	1.69231	1.1094	4.76923	1.96443	2.46154	1.71345	2.46154	1.94145	3.07692	2.17798	1	A	A	A		unclassified
1272	landschaft	krajobraz	27	5.74074	1.40309	1.14815	0.601518	1.33333	0.620174	1.33333	0.620174	1.07407	0.3849	14	5.92857	1.49174	1.21429	0.801784	1.21429	0.425815	1.28571	0.61125	1	0	13	5.53846	1.33012	1.07692	0.27735	1.46154	0.77625	1.38462	0.650444	1.15385	0.5547		H	H	H		H
2296	stehlen	kraść	26	1.5	1.27279	4.38462	1.94066	4.03846	2.34061	3.88462	2.23297	3.80769	2.51427	15	1.13333	0.516398	4.66667	1.49603	4.13333	2.19957	4	2.23607	3.66667	2.25726	11	2	1.78885	4	2.44949	3.90909	2.62505	3.72727	2.3277	4	2.93258		A	none	undifferentiated		unclassified
906	gitter	krata	26	1.38462	0.897861	3	1.76635	3.38462	1.85638	4.07692	1.99846	2.80769	2.02028	14	1.07143	0.267261	2.92857	1.59153	3.28571	1.72888	4.14286	2.0327	2.35714	1.7368	12	1.75	1.21543	3.08333	2.02073	3.5	2.06706	4	2.04495	3.33333	2.26969	1	F	none	undifferentiated		unclassified
1225	krawatte	krawat	27	3.22222	1.80455	1.44444	0.751068	1.37037	0.791695	1.33333	0.679366	1.40741	0.971092	14	3.42857	1.6968	1.64286	0.633324	1.35714	0.633324	1.28571	0.468807	1.28571	0.468807	13	3	1.95789	1.23077	0.83205	1.38462	0.960769	1.38462	0.869718	1.53846	1.33012	1	H	none	H		unclassified
1108	kante	krawędź	26	1.76923	1.33589	2.07692	1.78713	1.61538	1.16883	3.42308	2.043	1.61538	1.35873	13	1.76923	1.48064	1.92308	1.5525	1.38462	0.650444	3.53846	2.29548	1.30769	0.480384	13	1.76923	1.23517	2.23077	2.04751	1.84615	1.51911	3.30769	1.84321	1.92308	1.84669	1	F	none	F		F
1226	kreativ	kreatywny	26	5	1.89737	1.69231	1.4634	1.5	1.42127	1.80769	1.29674	1.19231	0.567044	15	5.06667	2.1202	1.66667	1.34519	1.6	1.59463	1.86667	1.35576	1.2	0.560612	11	4.90909	1.6404	1.72727	1.67874	1.36364	1.20605	1.72727	1.27208	1.18182	0.603023		H	H	H		unclassified
1228	kreide	kreda	26	1.92308	1.54721	1.80769	1.8115	1.57692	1.4191	1.92308	1.74179	2.19231	1.83345	12	1.75	1.21543	1.66667	1.61433	1.5	1.16775	1.75	1.60255	2.41667	1.88092	14	2.07143	1.8172	1.92857	2.01778	1.64286	1.64584	2.07143	1.89997	2	1.83973	1	D	none	undifferentiated		unclassified
1227	kredit	kredyt	26	1.46154	0.706018	3.73077	2.12711	3.57692	2.02333	4.30769	1.71509	3.07692	2.24362	14	1.21429	0.578934	3.42857	2.37663	3.5	2.37778	4.35714	1.78054	2.35714	1.98483	12	1.75	0.753778	4.08333	1.83196	3.66667	1.61433	4.25	1.71226	3.91667	2.31432	1	F	none	undifferentiated		unclassified
590	endziel	kres	26	2	1.5748	2.92308	1.97834	4.07692	2.09615	4.03846	2.12567	2.07692	1.95802	13	2.15385	1.86396	3.23077	2.27866	4.69231	2.28709	4.53846	2.43637	2.61538	2.56705	13	1.84615	1.28103	2.61538	1.66024	3.46154	1.76141	3.53846	1.71345	1.53846	0.877058	1	S	none	undifferentiated		unclassified
405	blut	krew	26	1.80769	1.54969	2.07692	1.83135	2.38462	1.60192	3.42308	2.08179	3.34615	2.11551	12	1.83333	1.85047	1.75	1.86474	2.66667	2.01509	3.5	2.15322	3.83333	2.4058	14	1.78571	1.3114	2.35714	1.82323	2.14286	1.16732	3.35714	2.09788	2.92857	1.8172	1	F	none	undifferentiated		unclassified
2663	verwandt	krewny	27	3.55556	1.47631	2.55556	1.47631	2.25926	1.74516	1.88889	1.25064	1.85185	1.40613	14	3.57143	1.55486	3	1.7097	2.14286	1.70326	2.35714	1.44686	2.14286	1.61041	13	3.53846	1.45002	2.07692	1.03775	2.38462	1.85016	1.38462	0.767948	1.53846	1.1266		H	none	H		unclassified
1128	kegel	kręgiel	27	3.85185	2.23097	1.33333	1	1.37037	0.92604	1.77778	1.42325	1.18519	0.483341	14	4.14286	2.38125	1.42857	1.34246	1.5	1.16024	2.07143	1.63915	1.28571	0.61125	13	3.53846	2.10616	1.23077	0.438529	1.23077	0.599145	1.46154	1.1266	1.07692	0.27735	1	H	none	H		unclassified
445	bullig	krępy	26	1.88462	1.27521	1.53846	1.17408	1.34615	0.745241	1.84615	1.40548	1.69231	1.37896	12	1.83333	1.2673	1.33333	0.651339	1	0	1.66667	1.37069	1.83333	1.40346	14	1.92857	1.32806	1.71429	1.48989	1.64286	0.928783	2	1.4676	1.57143	1.39859		H	none	undifferentiated		N
2498	trotz	krnąbrny	26	1.42308	0.702742	2.92308	1.54721	1.69231	1.08699	1.80769	1.05903	2.26923	1.15092	12	1.5	0.6742	2.91667	1.08362	1.83333	1.02986	2.08333	0.900337	2.16667	0.717741	14	1.35714	0.744946	2.92857	1.89997	1.57143	1.15787	1.57143	1.15787	2.35714	1.44686	1	A	none	undifferentiated		A
2121	schritt	krok	26	3.53846	1.98456	1.42308	0.702742	1.38462	0.697247	1.96154	1.18257	1.19231	0.491466	14	3.21429	2.15473	1.21429	0.578934	1.14286	0.363137	1.85714	1.40642	1.07143	0.267261	12	3.91667	1.78164	1.66667	0.778499	1.66667	0.887625	2.08333	0.900337	1.33333	0.651339	1	H	none	H		unclassified
1237	krokodil	krokodyl	27	2.48148	1.57798	1.88889	1.45002	2.25926	2.01136	3.37037	1.86358	2.18519	1.81949	14	3	1.7097	2	1.1767	2.21429	1.71772	4	1.56893	2.71429	2.01642	13	1.92308	1.25576	1.76923	1.73944	2.30769	2.35884	2.69231	1.97419	1.61538	1.44559	1	F	none	undifferentiated		F
1238	krokus	krokus	26	4.26923	2.08917	1.07692	0.392232	1.15385	0.464095	1.15385	0.464095	1.07692	0.392232	11	5.09091	2.0226	1	0	1	0	1	0	1	0	15	3.66667	1.98806	1.13333	0.516398	1.26667	0.593617	1.26667	0.593617	1.13333	0.516398	1	H	H	H		unclassified
2494	tropfen	kropla	26	3.26923	2.20105	1.38462	1.0612	1.76923	1.2746	1.26923	0.533494	1.15385	0.784465	11	3.90909	2.34327	1.54545	1.50756	1.90909	1.51357	1.09091	0.301511	1	0	15	2.8	2.04241	1.26667	0.593617	1.66667	1.1127	1.4	0.632456	1.26667	1.0328		H	none	H		unclassified
1241	kruzifix	krucyfiks	26	1.69231	1.34964	2.11538	1.68112	2.96154	2.12567	3.30769	2.20489	2.26923	1.80128	15	1.86667	1.59762	1.93333	1.53375	3.26667	2.1202	3.13333	2.2318	1.8	1.14642	11	1.45455	0.934199	2.36364	1.91169	2.54545	2.16165	3.54545	2.25227	2.90909	2.34327	1	F	none	undifferentiated		unclassified
1894	rabe	kruk	26	2	1.52315	1.73077	1.75631	2.15385	1.8263	2.53846	2.02447	1.92308	1.64738	11	1.45455	1.21356	2.27273	2.37027	2.81818	2.40076	3	2.19089	2.54545	2.06706	15	2.4	1.63881	1.33333	1.04654	1.66667	1.1127	2.2	1.89737	1.46667	1.12546	1	F	none	undifferentiated		unclassified
407	blutig	krwawy	26	1.42308	1.10175	3.61538	1.91994	3.88462	1.81828	5	1.69706	3.69231	2.31118	13	1.53846	1.45002	3.53846	1.94145	3.69231	1.93152	5.23077	1.64083	3.38462	2.18092	13	1.30769	0.630425	3.69231	1.97419	4.07692	1.75412	4.76923	1.7867	4	2.48328		F	none	undifferentiated		unclassified
1234	krimi	kryminał	26	2.30769	1.93431	2.26923	1.4299	2.46154	1.79401	3.5	2.06398	2.07692	1.41204	14	2.21429	2.11873	2.21429	1.47693	2.42857	1.94992	3.57143	2.24343	2.07143	1.54244	12	2.41667	1.78164	2.33333	1.43548	2.5	1.67874	3.41667	1.92865	2.08333	1.31137	1	F	none	undifferentiated		unclassified
1236	kritik	krytyczny	26	1.42308	0.856648	3.26923	1.56353	3.03846	1.96938	3.76923	2.23263	2.19231	1.64971	12	1.66667	0.887625	3	1.20605	2.33333	1.1547	3.33333	1.92275	1.75	0.965307	14	1.21429	0.801784	3.5	1.82925	3.64286	2.34052	4.14286	2.47626	2.57143	2.02729	1	F	none	undifferentiated		unclassified
2668	verweisen	krytykować	26	1.42308	1.10175	4.15385	2.09174	3.61538	2.35078	3.5	1.98494	2.69231	2.24088	11	1.27273	0.64667	4.72727	1.90215	4.54545	2.25227	4	2.19089	2.27273	2.149	15	1.53333	1.35576	3.73333	2.18654	2.93333	2.25093	3.13333	1.80739	3	2.32993		A	none	undifferentiated		unclassified
1235	krise	kryzys	26	1.26923	0.724303	4.26923	2.44226	4	2.28035	4.73077	2.14584	3.07692	2.31384	11	1.09091	0.301511	4.36364	2.65604	4.81818	1.77866	5.36364	1.91169	3.27273	2.4532	15	1.4	0.910259	4.2	2.36643	3.4	2.47271	4.26667	2.25093	2.93333	2.28244	1	F	none	undifferentiated		unclassified
1983	robust	krzepki	27	3.92593	1.97924	1.40741	0.693889	1.2963	0.823446	1.7037	1.2954	1.14815	0.456045	14	3.35714	1.7368	1.28571	0.61125	1.14286	0.363137	1.71429	1.32599	1.14286	0.363137	13	4.53846	2.10616	1.53846	0.77625	1.46154	1.1266	1.69231	1.31559	1.15385	0.5547		H	H	H		unclassified
2346	stuhl	krzesło	26	2.88462	1.79615	1.46154	0.760567	1.38462	0.803837	1.23077	0.58704	1.11538	0.431455	11	2.63636	2.2033	1.45455	0.8202	1.45455	0.687552	1.09091	0.301511	1	0	15	3.06667	1.48645	1.46667	0.743223	1.33333	0.899735	1.33333	0.723747	1.2	0.560612	1	H	none	H		N
2119	schreien	krzyczeć	26	1.84615	1.40548	4.5	1.72627	3.46154	1.88108	4.53846	1.63048	2.73077	2.03091	15	2	1.51186	4.8	1.69874	3.53333	1.9223	4.8	1.65616	2.73333	2.15362	11	1.63636	1.28629	4.09091	1.7581	3.36364	1.91169	4.18182	1.60114	2.72727	1.95402		F	none	undifferentiated		unclassified
878	geschrei	krzyk	27	1.59259	1.21716	4.40741	1.94658	3.62963	1.9245	5.96296	1.48016	2.85185	2.12501	14	1.35714	0.841897	5	1.41421	4.35714	2.13423	6.42857	0.755929	3.07143	2.30265	13	1.84615	1.51911	3.76923	2.27866	2.84615	1.3445	5.46154	1.89804	2.61538	1.98068	1	F	F	F		unclassified
2120	schrill	krzykliwy	27	2.25926	1.34715	3.92593	1.83818	2.25926	1.34715	2.44444	1.88788	2.85185	2.10683	14	2.14286	1.29241	4	1.79743	2.42857	1.39859	2.5	2.17503	2.5	2.13937	13	2.38462	1.44559	3.84615	1.95133	2.07692	1.32045	2.38462	1.60927	3.23077	2.08782		A	none	undifferentiated		A
757	folter	krzywdzić	26	1.34615	1.12933	5.61538	1.20256	5.34615	1.91713	5.07692	2.0381	4.38462	1.96116	15	1.06667	0.258199	5.73333	1.16292	5.86667	1.76743	5.53333	1.84649	4.33333	2.02367	11	1.72727	1.67874	5.45455	1.29334	4.63636	1.9633	4.45455	2.20743	4.45455	1.96792	1	A	none	undifferentiated		unclassified
1490	meineid	krzywoprzysięstwo	27	1.22222	0.800641	3.81481	2.05758	3.40741	2.0803	3.40741	1.96624	4.25926	2.06793	14	1.28571	1.06904	4.42857	2.1018	4	2.32048	4.28571	1.89852	4.78571	1.96815	13	1.15385	0.375534	3.15385	1.86396	2.76923	1.64083	2.46154	1.61325	3.69231	2.09701	1	D	none	undifferentiated		unclassified
1231	kreuz	krzyż	26	2.15385	1.59229	2.57692	1.92194	4.03846	2.18139	3.46154	2.15835	2.19231	1.91873	13	2.07692	1.38212	2.76923	2.16617	4.46154	2.25889	3.92308	2.36155	2	1.77951	13	2.23077	1.83275	2.38462	1.7097	3.61538	2.10311	3	1.91485	2.38462	2.10311	1	S	none	undifferentiated		unclassified
1785	pfarrer	ksiądz	26	2.11538	1.33647	2.88462	1.72805	2.61538	1.69887	2.69231	1.73826	2.11538	1.21085	14	1.85714	1.09945	2.85714	1.70326	2.21429	1.3114	2.42857	1.74154	1.78571	0.892582	12	2.41667	1.56428	2.91667	1.83196	3.08333	2.02073	3	1.7581	2.5	1.446	1	A	none	undifferentiated		unclassified
440	buch	książka	26	4.26923	1.88802	1.76923	1.39449	1.96154	1.48272	1.46154	0.904689	1.46154	1.39229	12	4.33333	1.77525	1.5	0.797724	1.91667	1.31137	1.66667	1.1547	1.41667	1.1645	14	4.21429	2.04483	2	1.75412	2	1.6641	1.28571	0.61125	1.5	1.60528	1	H	H	H		unclassified
1858	prinzessin	księżniczka	26	5	2	1.65385	1.35476	1.73077	1.45761	1.53846	1.27219	1.38462	1.0612	15	4.33333	2.28869	1.93333	1.66762	1.93333	1.62422	1.66667	1.34519	1.6	1.35225	11	5.90909	1.04447	1.27273	0.64667	1.45455	1.21356	1.36364	1.20605	1.09091	0.301511		H	H	H		unclassified
1567	mond	księżyc	26	5	1.2	1.30769	0.837579	2.73077	1.88802	1.65385	1.01754	1.11538	0.431455	13	5.15385	1.46322	1.07692	0.27735	3.23077	2.16617	1.69231	1.03155	1.15385	0.5547	13	4.84615	0.898717	1.53846	1.1266	2.23077	1.48064	1.61538	1.04391	1.07692	0.27735	1	H	H	H		unclassified
386	bilden	kształcić	27	5.18519	1.75493	1.55556	1.05003	1.2963	0.541708	2.18519	1.30198	1.07407	0.26688	14	5.92857	1.14114	1.71429	1.26665	1.42857	0.646206	2.5	1.45444	1.07143	0.267261	13	4.38462	1.98068	1.38462	0.767948	1.15385	0.375534	1.84615	1.06819	1.07692	0.27735		H	H	H		unclassified
883	gestalten	kształtujący	26	3.80769	1.93947	1.57692	1.30148	1.5	1.39284	1.76923	1.33589	1.26923	0.77757	15	4.06667	2.0166	1.8	1.61245	1.8	1.78085	2	1.60357	1.26667	0.703732	11	3.45455	1.86353	1.27273	0.64667	1.09091	0.301511	1.45455	0.8202	1.27273	0.904534		H	H	H		unclassified
271	becher	kubek	26	2.84615	1.78196	1.19231	0.633671	1.19231	0.633671	1.03846	0.196116	1.07692	0.271746	12	3.16667	2.16725	1	0	1	0	1	0	1	0	14	2.57143	1.39859	1.35714	0.841897	1.35714	0.841897	1.07143	0.267261	1.14286	0.363137	1	H	none	H		N
993	herd	kuchenka	26	3.11538	1.81828	1.5	1.30384	1.5	1.24097	1.69231	1.43581	1.69231	1.4634	13	3.15385	2.23033	1.61538	1.66024	1.53846	1.39137	1.76923	1.73944	1.69231	1.6525	13	3.07692	1.38212	1.38462	0.869718	1.46154	1.1266	1.61538	1.1209	1.69231	1.31559	1	H	none	H		unclassified
1836	pony	kucyk	26	4.26923	1.84516	1.5	0.989949	1.57692	1.27037	1.53846	1.30325	1.38462	0.752432	15	4.2	2.11119	1.4	0.910259	1.6	1.45406	1.6	1.59463	1.26667	0.457738	11	4.36364	1.50151	1.63636	1.12006	1.54545	1.03573	1.45455	0.8202	1.54545	1.03573	1	H	H	H		unclassified
2501	truhe	kufer	27	3.77778	1.96769	1.33333	0.620174	1.51852	1.08735	1.51852	0.802418	1.33333	0.784465	14	4.28571	2.33464	1.42857	0.646206	1.42857	0.937614	1.42857	0.755929	1.35714	0.744946	13	3.23077	1.36344	1.23077	0.599145	1.61538	1.26085	1.61538	0.869718	1.30769	0.85485	1	H	H	H		unclassified
1120	kasperl	kukiełka	26	2.23077	1.50486	2.38462	1.81278	2.46154	1.5292	2.26923	1.73338	2.34615	1.64784	15	2.33333	1.71825	2.66667	1.98806	2.6	1.59463	2.2	1.61245	2.06667	1.48645	11	2.09091	1.22103	2	1.54919	2.27273	1.48936	2.36364	1.9633	2.72727	1.84883	1	S	none	undifferentiated		unclassified
1439	mais	kukurydza	26	4.07692	2.07698	1.30769	0.617688	1.19231	0.567044	1.26923	0.874423	1.38462	1.0612	12	4.5	2.19504	1.25	0.621582	1.25	0.621582	1.25	0.621582	1.25	0.621582	14	3.71429	1.9779	1.35714	0.633324	1.14286	0.534522	1.28571	1.06904	1.5	1.3445	1	H	H	H		unclassified
1243	kugel	kula	26	1.80769	1.3862	2	1.49666	1.96154	1.88639	2.73077	2.34193	2.03846	1.68477	12	2	1.65145	2.08333	1.44338	1.58333	1.24011	2.41667	2.06522	2	1.70561	14	1.64286	1.15073	1.92857	1.59153	2.28571	2.30146	3	2.60177	2.07143	1.73046	1	F	none	undifferentiated		unclassified
1026	höhepunkt	kulminacja	27	3.48148	1.76222	1.74074	1.19591	1.59259	1.08342	2.40741	1.78151	1.66667	1.38675	14	4.21429	1.42389	2.21429	1.42389	1.85714	1.23146	3	1.4676	1.92857	1.38477	13	2.69231	1.79743	1.23077	0.599145	1.30769	0.85485	1.76923	1.92154	1.38462	1.38675		H	none	undifferentiated		unclassified
1246	kult	kult	26	3	2.09762	2.34615	1.71912	2	1.46969	3.11538	1.86176	2.61538	1.87781	11	2.72727	1.73729	2.09091	1.3751	2.09091	1.3751	3.63636	1.91169	2.81818	1.88776	15	3.2	2.36643	2.53333	1.95911	1.93333	1.57963	2.73333	1.79151	2.46667	1.9223	1	F	none	undifferentiated		unclassified
1247	kultur	kulturalny	26	4.5	1.63095	1.19231	0.401918	1.15385	0.464095	1.26923	0.827415	1.19231	0.491466	12	5.16667	1.58592	1.08333	0.288675	1.16667	0.389249	1.08333	0.288675	1	0	14	3.92857	1.49174	1.28571	0.468807	1.14286	0.534522	1.42857	1.08941	1.35714	0.633324	1	H	H	H		unclassified
1127	kaufen	kupować	26	4.42308	1.67745	2.69231	2.03508	2.11538	1.33647	2.11538	1.3062	1.84615	1.40548	13	5.07692	1.32045	3.38462	2.25605	2.38462	1.50214	2.38462	1.55662	1.76923	1.48064	13	3.76923	1.7867	2	1.58114	1.84615	1.14354	1.84615	0.987096	1.92308	1.38212		H	H	H		unclassified
1036	huhn	kura	27	2.96296	2.10277	1.40741	0.930643	1.40741	0.888355	1.62963	1.27545	2.37037	2.05965	14	2.92857	2.1649	1.42857	1.15787	1.35714	0.841897	1.85714	1.56191	1.78571	1.84718	13	3	2.12132	1.38462	0.650444	1.46154	0.967418	1.38462	0.869718	3	2.16025	1	H	none	undifferentiated		unclassified
2690	vormund	kurator	26	1.46154	1.10384	2.96154	2.06844	2.84615	2.12964	4.07692	2.09615	2.19231	2.09798	11	1.27273	0.64667	3	2.19089	3.27273	2.49363	4.54545	1.96792	2.09091	2.21154	15	1.6	1.35225	2.93333	2.05171	2.53333	1.84649	3.73333	2.18654	2.26667	2.08624	1	F	none	undifferentiated		F
1258	kurort	kurort	26	4.61538	1.91994	1.30769	1.01071	1.34615	0.845804	1.65385	1.35476	1.34615	0.689481	12	4.41667	1.88092	1.08333	0.288675	1.41667	0.900337	1.16667	0.389249	1.08333	0.288675	14	4.78571	2.00686	1.5	1.3445	1.28571	0.82542	2.07143	1.73046	1.57143	0.851631	1	H	H	H		unclassified
1073	jacke	kurtka	27	3.2963	2.0346	1.18519	0.483341	1.03704	0.19245	1.07407	0.26688	1.03704	0.19245	14	3.28571	2.16364	1.14286	0.363137	1.07143	0.267261	1.07143	0.267261	1.07143	0.267261	13	3.30769	1.97419	1.23077	0.599145	1	0	1.07692	0.27735	1	0	1	H	H	H		N
1043	hure	kurwa	26	2.46154	2.0829	4.92308	1.71868	3.07692	2.18949	3.26923	2.29011	3.84615	2.2573	12	2.33333	2.10339	4.5	1.446	3.08333	1.92865	3.16667	1.85047	4.41667	2.10878	14	2.57143	2.13809	5.28571	1.89852	3.07143	2.46403	3.35714	2.67775	3.35714	2.34052	1	A	none	undifferentiated		unclassified
2289	staub	kurz	26	1.42308	0.856648	3.26923	2.25491	2.92308	1.97834	2.03846	1.50946	3.30769	1.8925	12	1.5	0.904534	3.75	2.45412	2.75	1.86474	2.41667	1.92865	4	2.2563	14	1.35714	0.841897	2.85714	2.0702	3.07143	2.12908	1.71429	0.99449	2.71429	1.32599	1	D	none	undifferentiated		unclassified
1381	locken	kusić	26	3.53846	1.72582	1.92308	1.23038	1.61538	0.941357	2.76923	1.36551	1.5	1.06771	12	3.41667	1.67649	1.91667	0.996205	1.58333	0.996205	2.75	1.48477	1.25	0.621582	14	3.64286	1.82323	1.92857	1.43925	1.64286	0.928783	2.78571	1.3114	1.71429	1.32599		H	none	undifferentiated		unclassified
1956	reizvoll	kuszący	26	4	1.81108	1.5	1.24097	1.65385	1.44062	2.76923	1.63236	1.5	1.17473	12	4.16667	1.89896	1.16667	0.389249	1.41667	0.900337	2.41667	0.996205	1.25	0.621582	14	3.85714	1.79131	1.78571	1.62569	1.85714	1.79131	3.07143	2.01778	1.71429	1.48989		H	none	H		unclassified
2040	sauer	kwaśny	26	2.42308	1.30148	1.73077	1.18516	1.53846	1.10384	1.46154	1.02882	2.34615	1.67194	12	2.91667	1.08362	1.66667	0.887625	1.41667	0.668558	1.33333	0.651339	2.16667	1.11464	14	2	1.35873	1.78571	1.42389	1.64286	1.39268	1.57143	1.28388	2.5	2.06621		H	none	undifferentiated		unclassified
403	blume	kwiat	26	5.38462	1.32897	1.15385	0.464095	1.42308	0.945434	1.26923	0.724303	1.15385	0.464095	12	5.58333	1.50504	1	0	1.66667	1.23091	1.16667	0.389249	1.16667	0.389249	14	5.21429	1.18831	1.28571	0.61125	1.21429	0.578934	1.35714	0.928783	1.14286	0.534522	1	H	H	H		H
358	betrag	kwota	26	2.61538	1.87781	1.46154	1.02882	1.61538	1.09825	2.03846	1.42775	1.23077	0.58704	12	2.25	1.60255	1.5	1.16775	1.58333	1.24011	1.75	1.13818	1.25	0.621582	14	2.92857	2.09263	1.42857	0.937614	1.64286	1.00821	2.28571	1.63747	1.21429	0.578934	1	H	none	undifferentiated		unclassified
1264	labor	laboratoryjny	26	2.80769	2.11696	1.19231	0.491466	1.38462	0.803837	2.46154	1.81617	1.76923	1.1422	14	2.35714	1.94569	1.21429	0.578934	1.28571	0.61125	2.28571	2.05421	1.71429	1.13873	12	3.33333	2.26969	1.16667	0.389249	1.5	1	2.66667	1.557	1.83333	1.19342	1	H	none	undifferentiated		unclassified
2417	theke	lada	27	1.85185	1.63387	1.51852	1.28214	1.59259	1.18514	1.55556	1.25064	1.55556	1.31071	14	2.07143	1.59153	1.64286	1.21574	1.85714	1.23146	1.78571	1.3688	1.71429	1.48989	13	1.61538	1.7097	1.38462	1.38675	1.30769	1.1094	1.30769	1.1094	1.38462	1.1209	1	H	none	undifferentiated		N
1883	puppe	lalka	27	2.96296	1.7863	1.22222	0.50637	1.48148	0.802418	1.55556	1.08604	1.40741	0.930643	14	3.92857	1.49174	1.35714	0.633324	1.78571	0.892582	1.5	1.16024	1.21429	0.578934	13	1.92308	1.49786	1.07692	0.27735	1.15385	0.5547	1.61538	1.04391	1.61538	1.19293	1	H	none	H		unclassified
2745	wehklage	lamentować	26	1.07692	0.392232	3.73077	2.20105	3.84615	2.18527	2.57692	2.10092	3.80769	2.22745	12	1	0	4.41667	2.35327	3.66667	2.42462	2.91667	2.46644	4.91667	2.23437	14	1.14286	0.534522	3.14286	1.95555	4	2.0381	2.28571	1.77281	2.85714	1.79131	1	S	none	undifferentiated		unclassified
1271	lampe	lampa	26	3.53846	1.72582	1.57692	0.808608	1.61538	1.02282	1.73077	1.11562	1.34615	0.628796	15	3.86667	1.80739	1.4	0.736788	1.46667	1.0601	1.6	0.985611	1.2	0.414039	11	3.09091	1.57826	1.81818	0.873863	1.81818	0.98165	1.90909	1.30035	1.54545	0.8202	1	H	H	H		unclassified
1324	leopard	lampart	27	3.2963	1.89767	1.88889	1.36814	1.7037	1.10296	3.33333	1.79743	1.44444	0.9337	14	4.21429	1.84718	2.21429	1.3688	1.85714	1.02711	4.14286	1.79131	1.5	0.94054	13	2.30769	1.4367	1.53846	1.33012	1.53846	1.19829	2.46154	1.39137	1.38462	0.960769	1	F	none	blended	FH	F
1274	larve	larwa	26	1.23077	0.514408	2.26923	1.84516	1.76923	1.55712	3.42308	2.35241	4.73077	2.2371	15	1.33333	0.617213	2.13333	1.95911	2.06667	1.75119	3.46667	2.2318	4.53333	2.29492	11	1.09091	0.301511	2.45455	1.75292	1.36364	1.20605	3.36364	2.61812	5	2.23607	1	D	none	undifferentiated		D
2725	wald	las	26	5.30769	1.71509	1.26923	0.603834	1.53846	0.904689	2.80769	2.03998	1.23077	0.862911	12	5.58333	1.67649	1.08333	0.288675	1.25	0.866025	2.66667	1.87487	1	0	14	5.07143	1.77436	1.42857	0.755929	1.78571	0.892582	2.92857	2.23484	1.42857	1.15787	1	H	H	H		unclassified
743	fliegen	latać	26	5.34615	1.49512	1.26923	0.452344	1.53846	1.02882	2.88462	1.33647	1.15385	0.367946	14	5.28571	1.72888	1.21429	0.425815	1.71429	1.26665	3.14286	1.46009	1.07143	0.267261	12	5.41667	1.24011	1.33333	0.492366	1.33333	0.651339	2.58333	1.1645	1.25	0.452267		H	H	H		unclassified
1278	laterne	latarnia	26	3.11538	2.04601	1.57692	1.4744	1.96154	1.50946	2.19231	1.78928	1.69231	1.64364	12	3.41667	1.92865	1.83333	1.85047	1.75	1.3568	2.5	1.93061	1.83333	1.85047	14	2.85714	2.17882	1.35714	1.08182	2.14286	1.65748	1.92857	1.68543	1.57143	1.50457	1	H	none	undifferentiated		unclassified
2226	sommer	lato	26	5.80769	1.49718	1.23077	0.58704	1.23077	0.58704	1.11538	0.431455	1.19231	0.491466	11	5.72727	1.79393	1.18182	0.603023	1.27273	0.64667	1	0	1	0	15	5.86667	1.30201	1.26667	0.593617	1.2	0.560612	1.2	0.560612	1.33333	0.617213	1	H	H	H		H
27	ableger	latorośl	26	4.15385	2.09174	1.5	0.860233	1.42308	0.757526	1.69231	1.22537	1.5	1.24097	14	4	2.35339	1.35714	0.744946	1.21429	0.425815	1.71429	1.38278	1.21429	0.425815	12	4.33333	1.82574	1.66667	0.984732	1.66667	0.984732	1.66667	1.07309	1.83333	1.74946	1	H	H	H		unclassified
1387	lorbeer	laur	26	4.73077	1.48479	1.26923	0.827415	1.23077	0.514408	1.23077	0.429669	1.11538	0.588348	12	4.66667	1.49747	1.5	1.16775	1.5	0.6742	1.41667	0.514929	1.25	0.866025	14	4.78571	1.52812	1.07143	0.267261	1	0	1.07143	0.267261	1	0	1	H	H	H		unclassified
1287	lawine	lawina	26	1.42308	0.945434	2.61538	1.69887	3.30769	1.97523	5.26923	1.63848	2.84615	2.09174	13	1.15385	0.375534	3	2.04124	4.15385	2.11527	6.30769	0.947331	3.30769	2.21302	13	1.69231	1.25064	2.23077	1.23517	2.46154	1.45002	4.23077	1.5359	2.38462	1.93815	1	F	F	F		F
306	behandlung	leczenie	27	2.55556	1.78311	2.66667	1.51911	3.66667	1.90142	4.07407	1.87956	2.55556	1.82574	14	2.71429	1.81568	3.35714	1.64584	4.35714	1.82323	4.92857	1.49174	3.42857	1.94992	13	2.38462	1.80455	1.92308	0.954074	2.92308	1.75412	3.15385	1.86396	1.61538	1.1209		F	none	undifferentiated		unclassified
305	behandeln	leczyć	26	3.34615	2.33139	1.38462	0.852147	1.96154	1.28002	2.96154	2.1444	1.61538	1.23538	12	3.16667	2.2088	1.58333	0.900337	2.33333	1.37069	3.41667	2.19331	1.66667	0.984732	14	3.5	2.50384	1.21429	0.801784	1.64286	1.15073	2.57143	2.1018	1.57143	1.45255		H	none	undifferentiated		unclassified
173	arzt	lekarz	27	3.14815	1.89541	2.92593	1.93998	2.62963	2.04089	3.25926	2.06793	2.22222	1.96769	14	3.35714	2.06089	2.5	2.02864	2.71429	2.36736	2.92857	2.30265	2.14286	2.0702	13	2.92308	1.75412	3.38462	1.80455	2.53846	1.71345	3.61538	1.80455	2.30769	1.93152	1	F	none	undifferentiated		unclassified
1316	lektion	lekcja	27	2.48148	1.47727	1.81481	1.0755	2	1.30089	2.37037	1.57256	1.92593	1.59147	14	3.28571	1.43734	2.14286	1.29241	2.42857	1.45255	2.64286	1.69193	2.14286	1.95555	13	1.61538	0.960769	1.46154	0.660225	1.53846	0.967418	2.07692	1.44115	1.69231	1.1094	1	H	none	undifferentiated		unclassified
2521	übermut	lekkomyślność	26	1.69231	1.22537	3.76923	1.79572	3.23077	2.10348	3.19231	2.15442	2.38462	1.67516	15	1.53333	0.915475	4.2	1.89737	3.4	2.16465	3.8	2.11119	2.06667	1.38701	11	1.90909	1.57826	3.18182	1.53741	3	2.09762	2.36364	2.01359	2.81818	1.99089	1	A	none	undifferentiated		unclassified
2235	sorglos	lekkomyślny	27	1.59259	0.930643	4.18519	1.90217	2.66667	1.59326	3	1.94145	2.59259	1.90665	14	1.5	0.85485	5.07143	1.43925	3.21429	1.76193	3.57143	2.13809	2.92857	1.97929	13	1.69231	1.03155	3.23077	1.92154	2.07692	1.18754	2.38462	1.55662	2.23077	1.83275		A	none	undifferentiated		A
1304	leichte	lekkość	27	5.40741	1.78151	1.11111	0.423659	1.07407	0.26688	1.18519	0.483341	1.03704	0.19245	14	5.35714	2.20514	1.07143	0.267261	1.07143	0.267261	1.14286	0.363137	1	0	13	5.46154	1.26592	1.15385	0.5547	1.07692	0.27735	1.23077	0.599145	1.07692	0.27735	1	H	H	H		H
1340	lexikon	leksykon	26	2.42308	1.70113	1.46154	1.10384	1.38462	0.941357	1.26923	0.77757	1.46154	1.50282	14	1.78571	1.12171	1.28571	0.61125	1.14286	0.534522	1	0	1	0	12	3.16667	1.99241	1.66667	1.49747	1.66667	1.23091	1.58333	1.08362	2	2.13201	1	H	none	undifferentiated		N
1360	limonade	lemoniada	27	5.03704	1.50592	1.25926	0.655896	1.33333	0.784465	1.25926	0.655896	1.33333	0.919866	14	5.35714	1.39268	1.28571	0.726273	1.28571	0.61125	1.35714	0.841897	1.35714	1.08182	13	4.69231	1.60128	1.23077	0.599145	1.38462	0.960769	1.15385	0.375534	1.30769	0.751068	1	H	H	H		H
1396	löwe	lew	26	3.34615	2.11551	1.57692	1.17211	1.57692	1.33186	3.19231	1.78928	1.42308	0.986836	11	3.54545	2.25227	1.63636	1.43337	2	1.78885	3.63636	1.91169	1.54545	1.21356	15	3.2	2.07709	1.53333	0.99043	1.26667	0.798809	2.86667	1.68466	1.33333	0.816497	1	H	none	blended	HF	unclassified
2141	schweben	lewitować	27	4.11111	2.22457	1.11111	0.320256	1.14815	0.456045	2.37037	1.49739	1.03704	0.19245	14	3.92857	2.09263	1.07143	0.267261	1.14286	0.534522	2.35714	1.78054	1.07143	0.267261	13	4.30769	2.42846	1.15385	0.375534	1.15385	0.375534	2.38462	1.19293	1	0		H	none	H		unclassified
1355	liege	leżanka	26	4.11538	1.96625	1.38462	0.982931	1.80769	1.26552	1.65385	1.19808	1.38462	0.897861	14	4.14286	2.10703	1.35714	1.08182	1.64286	1.39268	1.5	1.3445	1.21429	0.578934	12	4.08333	1.88092	1.41667	0.900337	2	1.12815	1.83333	1.02986	1.58333	1.1645	1	H	H	H		unclassified
1356	liegen	leżeć	26	4.53846	1.77157	1.65385	1.32491	1.73077	1.21845	1.65385	1.32491	1.30769	0.970329	11	4.63636	1.85864	1.90909	1.81409	2.09091	1.3751	1.81818	1.32802	1.27273	0.904534	15	4.46667	1.76743	1.46667	0.833809	1.46667	1.0601	1.53333	1.35576	1.33333	1.04654		H	H	H		unclassified
120	angst	lęk	26	1.11538	0.431455	2.46154	2.02447	3.57692	2.13866	5.76923	1.88271	3.03846	2.42455	12	1	0	2.33333	1.92275	3.58333	2.06522	6.41667	0.514929	2	1.95402	14	1.21429	0.578934	2.57143	2.17377	3.57143	2.27746	5.21429	2.42356	3.92857	2.49505	1	F	F	F		F
1343	liberal	liberalny	27	4.22222	2.04438	2.18519	1.90217	1.55556	1.31071	2	1.44115	1.85185	1.83353	14	4.5	2.13937	1.85714	1.83375	1.64286	1.64584	2.07143	1.63915	1.85714	1.83375	13	3.92308	1.97744	2.53846	1.98391	1.46154	0.877058	1.92308	1.25576	1.84615	1.90815		H	none	H		unclassified
1374	lizenz	licencja	26	2.96154	2.12567	1.76923	1.42289	1.57692	1.23849	2.07692	1.29377	1.69231	1.43581	12	2.58333	1.78164	2.16667	1.85047	1.83333	1.58592	2.58333	1.37895	2.08333	1.92865	14	3.28571	2.39963	1.42857	0.851631	1.35714	0.841897	1.64286	1.08182	1.35714	0.744946	1	H	none	undifferentiated		unclassified
151	anzahl	liczba	27	2.92593	1.7743	1.77778	1.18754	1.66667	1.24035	1.62963	1.14852	1.40741	1.15223	14	2.42857	1.74154	1.57143	1.15787	1.57143	1.28388	1.64286	1.27745	1.57143	1.50457	13	3.46154	1.71345	2	1.22474	1.76923	1.23517	1.61538	1.04391	1.23077	0.599145	1	H	none	H		unclassified
2826	zahl	liczny	26	3.19231	1.67378	1.5	0.812404	1.30769	0.735893	2.15385	1.34736	1.42308	1.02657	12	3.41667	1.83196	1.58333	0.668558	1.25	0.452267	2	1.04447	1.16667	0.389249	14	3	1.56893	1.42857	0.937614	1.35714	0.928783	2.28571	1.5898	1.64286	1.33631	1	H	none	H		unclassified
2828	zählen	liczyć	26	2.88462	1.68112	1.92308	1.26248	1.53846	1.10384	2.03846	1.21592	1.5	1.14018	15	2.6	1.50238	1.93333	1.16292	1.66667	1.29099	2.06667	1.27988	1.66667	1.29099	11	3.27273	1.90215	1.90909	1.446	1.36364	0.80904	2	1.18322	1.27273	0.904534		H	none	undifferentiated		unclassified
2152	seerose	lilia	26	4.65385	2.01876	1.07692	0.271746	2.11538	1.79615	1.5	1.30384	1.42308	0.902134	15	4.46667	2.35635	1.06667	0.258199	2.26667	1.90738	1.73333	1.62422	1.2	0.774597	11	4.90909	1.51357	1.09091	0.301511	1.90909	1.70027	1.18182	0.603023	1.72727	1.00905	1	H	H	H		unclassified
1359	limit	limit	26	1.53846	0.947872	3.5	2.24944	3.19231	1.76679	3.19231	1.87658	1.96154	1.73161	13	1.46154	0.967418	3.84615	2.40992	3.38462	1.93815	3.53846	2.25889	2.38462	2.32875	13	1.61538	0.960769	3.15385	2.11527	3	1.63299	2.84615	1.40512	1.53846	0.660225	1	A	none	blended	ASF	unclassified
2163	seil	lina	26	2.46154	1.5292	1.57692	1.17211	1.73077	1.4299	2.38462	1.79057	1.38462	1.23538	11	2.54545	1.69491	1.72727	1.42063	2.09091	1.8684	3	2.04939	1.63636	1.80404	15	2.4	1.45406	1.46667	0.99043	1.46667	0.99043	1.93333	1.48645	1.2	0.560612	1	H	none	undifferentiated		unclassified
1364	linie	linia	27	2.33333	1.4676	1.14815	0.601518	1.25926	0.655896	1.22222	0.640513	1.07407	0.26688	14	2.57143	1.55486	1	0	1.21429	0.578934	1.35714	0.841897	1.07143	0.267261	13	2.07692	1.38212	1.30769	0.85485	1.30769	0.751068	1.07692	0.27735	1.07692	0.27735	1	H	none	H		N
1363	lineal	linijka	26	1.88462	1.50537	1.73077	1.25085	1.46154	1.1395	1.46154	0.811456	1.57692	1.10175	15	1.4	0.736788	1.66667	0.9759	1.26667	0.593617	1.46667	0.743223	1.66667	1.29099	11	2.54545	2.0181	1.81818	1.60114	1.72727	1.61808	1.45455	0.934199	1.45455	0.8202	1	H	none	undifferentiated		N
1361	linde	lipa	27	3.07407	2.21752	2.48148	1.84746	2.25926	1.6075	2	1.44115	1.59259	1.39392	14	2.5	2.34521	3.28571	2.09132	2.71429	1.85757	2.35714	1.64584	1.64286	1.7368	13	3.69231	1.97419	1.61538	1.04391	1.76923	1.16575	1.61538	1.1209	1.53846	0.967418	1	H	none	undifferentiated		unclassified
1414	lyrik	liryka	26	4.07692	2.26138	1.42308	0.986836	2.80769	1.78928	1.53846	0.947872	1.26923	0.874423	11	4.45455	2.20743	1.27273	0.904534	3.45455	2.16165	1.63636	1.20605	1	0	15	3.8	2.33605	1.53333	1.0601	2.33333	1.34519	1.46667	0.743223	1.46667	1.12546	1	H	none	blended	HS	unclassified
797	fuchs	lis	26	3.26923	1.84516	1.96154	1.48272	1.38462	0.571099	2.5	1.67929	1.65385	1.09334	14	2.92857	1.68543	1.85714	1.65748	1.21429	0.425815	2.57143	1.86936	1.5	1.16024	12	3.66667	2.01509	2.08333	1.31137	1.58333	0.668558	2.41667	1.50504	1.83333	1.02986	1	H	none	undifferentiated		unclassified
428	brief	list	27	4.11111	1.47631	2.11111	1.42325	2.44444	1.18754	2.37037	1.64429	1.55556	0.974022	14	4.28571	1.38278	2.28571	1.54066	2.64286	1.08182	2.57143	1.28388	1.71429	1.13873	13	3.92308	1.60528	1.92308	1.32045	2.23077	1.30089	2.15385	1.99358	1.38462	0.767948	1	H	H	H		unclassified
1369	liste	lista	26	2.30769	1.37896	1.65385	1.05612	1.5	1.06771	2.26923	1.5889	1.46154	0.904689	15	2.26667	1.43759	1.73333	1.2228	1.6	1.18322	2.53333	1.76743	1.4	0.828079	11	2.36364	1.36182	1.54545	0.8202	1.36364	0.924416	1.90909	1.30035	1.54545	1.03573	1	H	none	undifferentiated		unclassified
1690	november	listopadowy	26	2	1.2	2.07692	1.38342	4	1.78885	2.15385	1.7133	2.5	2.00499	15	1.86667	1.40746	2.06667	1.16292	4.06667	1.83095	2.33333	1.44749	2.33333	1.58865	11	2.18182	0.873863	2.09091	1.70027	3.90909	1.81409	1.90909	2.07145	2.72727	2.53341	1	S	none	S		S
1371	litanei	litania	26	1.46154	0.760567	2.34615	1.71912	2.96154	2.12567	1.80769	1.72091	2.26923	1.80128	12	1.41667	0.668558	2.08333	1.50504	2.41667	1.72986	1.66667	1.07309	1.75	1.05529	14	1.5	0.85485	2.57143	1.91007	3.42857	2.37663	1.92857	2.1649	2.71429	2.1989	1	S	none	undifferentiated		unclassified
1373	literatur	literatura	26	3.76923	1.68066	1.5	1.30384	1.88462	1.33647	1.57692	1.33186	1.61538	1.55118	15	4	1.73205	1.13333	0.351866	1.46667	0.743223	1.13333	0.351866	1	0	11	3.45455	1.63485	2	1.89737	2.45455	1.75292	2.18182	1.88776	2.45455	2.16165		H	H	H		unclassified
2788	willen	litość	27	2	1.98068	2.81481	2.00071	4.11111	1.9282	2.81481	1.90217	2.33333	1.94145	14	1.57143	1.08941	2.78571	2.25929	4.28571	1.68379	3	2.2532	2.21429	1.80506	13	2.46154	2.60177	2.84615	1.77229	3.92308	2.21591	2.61538	1.50214	2.46154	2.14536	1	S	none	S		unclassified
1372	liter	litr	26	3.11538	2.25081	1.46154	1.02882	1.42308	1.17211	2.03846	1.86506	1.57692	1.17211	12	3.16667	2.36771	1.41667	0.996205	1.25	0.866025	2	1.95402	1.5	1.16775	14	3.07143	2.23484	1.5	1.09193	1.57143	1.39859	2.07143	1.85904	1.64286	1.21574	1	H	none	undifferentiated		unclassified
1411	lutscher	lizak	27	4.88889	1.60128	1.22222	0.50637	1.33333	0.733799	1.18519	0.557262	1.03704	0.19245	14	5.14286	1.40642	1.35714	0.633324	1.28571	0.61125	1.14286	0.534522	1	0	13	4.61538	1.80455	1.07692	0.27735	1.38462	0.869718	1.23077	0.599145	1.07692	0.27735	1	H	H	H		H
2630	verlies	loch	26	1.38462	1.02282	3.07692	2.38198	3.96154	2.28877	4.92308	1.91673	4.03846	2.06844	11	1.27273	0.904534	3.18182	2.52262	4.27273	2.19504	5.54545	1.57249	4.27273	2.05382	15	1.46667	1.12546	3	2.36039	3.73333	2.40436	4.46667	2.06559	3.86667	2.13363	1	F	none	undifferentiated		unclassified
1385	logisch	logiczny	26	4.03846	2.10677	1.76923	1.47804	1.42308	1.13747	1.46154	1.24035	1.38462	1.23538	12	4.58333	1.92865	2.25	1.91288	1.75	1.54479	1.66667	1.72328	1.58333	1.72986	14	3.57143	2.20887	1.35714	0.841897	1.14286	0.534522	1.28571	0.61125	1.21429	0.578934		H	H	H		unclassified
1384	logik	logika	27	3.85185	1.9156	1.55556	1.01274	1.55556	1.1209	1.55556	1.05003	1.51852	0.935224	14	3.78571	1.62569	1.64286	0.928783	1.78571	1.3114	1.71429	1.20439	1.57143	0.937614	13	3.92308	2.2532	1.46154	1.1266	1.30769	0.85485	1.38462	0.869718	1.46154	0.967418	1	H	H	H		unclassified
1397	loyal	lojalny	27	5.85185	1.32153	1.18519	0.483341	1.18519	0.622466	1.59259	1.11835	1.14815	0.456045	14	6.14286	0.949262	1.28571	0.61125	1.07143	0.267261	1.28571	1.06904	1.14286	0.534522	13	5.53846	1.61325	1.07692	0.27735	1.30769	0.85485	1.92308	1.11516	1.15385	0.375534		H	H	H		H
1822	platz	lokalizacja	26	1.80769	1.49718	1.15385	0.612686	1.19231	0.69393	1.26923	0.533494	1.23077	0.862911	12	2	1.3484	1.08333	0.288675	1.16667	0.57735	1.33333	0.651339	1.16667	0.57735	14	1.64286	1.64584	1.21429	0.801784	1.21429	0.801784	1.21429	0.425815	1.28571	1.06904	1	H	none	undifferentiated		N
2073	schicksal	los	26	2.80769	2.17291	1.96154	1.45549	2.57692	1.92194	2.84615	1.97367	1.5	0.860233	12	2.5	2.19504	1.33333	0.651339	2.08333	1.72986	2.75	2.09436	1.25	0.621582	14	3.07143	2.20015	2.5	1.74312	3	2.0381	2.92857	1.94004	1.71429	0.99449		F	none	undifferentiated		unclassified
1393	lotterie	loteria	27	4	1.77591	2.14815	1.09908	1.7037	0.992852	2.37037	1.39085	1.51852	1.05139	14	4.35714	1.49908	2.07143	1.07161	2	1.1767	2.28571	1.43734	1.28571	0.82542	13	3.61538	2.02231	2.23077	1.16575	1.38462	0.650444	2.46154	1.39137	1.76923	1.23517	1	H	none	H		unclassified
751	flughafen	lotnisko	27	3.92593	2.01773	1.25926	0.594371	1.7037	1.23459	2.7037	1.51441	1.03704	0.19245	14	4.07143	1.97929	1.21429	0.425815	1.5	0.94054	3.28571	1.68379	1	0	13	3.76923	2.12736	1.30769	0.751068	1.92308	1.49786	2.07692	1.03775	1.07692	0.27735		H	none	H		unclassified
1395	lotus	lotos	26	3.61538	2.02142	1.26923	0.724303	1.5	1.14018	1.26923	0.874423	1.26923	0.874423	12	3.41667	2.35327	1.33333	0.651339	1.16667	0.57735	1.16667	0.57735	1.25	0.621582	14	3.78571	1.76193	1.21429	0.801784	1.78571	1.42389	1.35714	1.08182	1.28571	1.06904	1	H	H	H		unclassified
1394	lotto	lotto	26	4.11538	2.17857	2.34615	1.85348	2	1.76635	1.73077	1.11562	1.80769	1.62528	15	3.93333	2.18654	2.8	2.04241	2.4	2.1314	1.8	1.01419	1.4	0.910259	11	4.36364	2.24823	1.72727	1.42063	1.45455	0.934199	1.63636	1.28629	2.36364	2.2033	1	H	none	H		unclassified
576	eis	lód	26	3.46154	2.1951	1.61538	0.982931	2	1.54919	2.26923	1.73338	1.38462	0.941357	12	3.5	2.50454	1.25	0.621582	1.83333	1.40346	1.91667	1.67649	1.5	1.24316	14	3.42857	1.98898	1.92857	1.14114	2.14286	1.70326	2.57143	1.78516	1.28571	0.61125		H	none	undifferentiated		unclassified
1335	leuchten	lśnić	26	3.84615	1.91191	1.30769	0.837579	1.19231	0.567044	1.30769	0.735893	1.11538	0.325813	12	4.08333	1.72986	1.08333	0.288675	1	0	1.25	0.866025	1	0	14	3.64286	2.09788	1.5	1.09193	1.35714	0.744946	1.35714	0.633324	1.21429	0.425815		H	H	H		unclassified
1557	mögen	lubić	26	5.92308	1.09263	1.46154	1.02882	1.5	1.14018	1.38462	0.803837	1.07692	0.271746	14	5.78571	1.3114	1.21429	0.578934	1.5	1.40055	1.28571	0.61125	1.07143	0.267261	12	6.08333	0.792961	1.75	1.3568	1.5	0.797724	1.5	1	1.08333	0.288675		H	H	H		H
2768	weltkrieg	ludobójstwo	53	1.07547	0.331027	5.28302	2.12474	5.62264	1.70098	5.4717	1.84603	5.62264	1.98287	28	1.03571	0.188982	5.71429	2.0341	6.21429	1.64107	6.07143	1.63137	6	1.9245	25	1.12	0.439697	4.8	2.16025	4.96	1.54056	4.8	1.87083	5.2	2		none	none	undifferentiated		unclassified
1339	leute	ludzie	27	3.7037	1.79347	2.74074	1.53404	2.03704	1.15962	2.85185	1.72546	1.88889	1.52753	14	4.21429	1.84718	2.64286	1.54955	2.07143	1.20667	3.21429	1.96815	1.85714	1.70326	13	3.15385	1.62512	2.84615	1.57301	2	1.1547	2.46154	1.39137	1.92308	1.38212	1	H	none	undifferentiated		unclassified
1503	menschheit	ludzki	26	3.65385	1.78756	1.46154	1.1395	1.92308	1.44009	1.65385	1.26309	1.34615	0.745241	12	3.58333	1.83196	1.25	0.452267	1.66667	1.1547	1.58333	0.900337	1.16667	0.389249	14	3.71429	1.81568	1.64286	1.49908	2.14286	1.65748	1.71429	1.54066	1.5	0.94054		H	none	H		unclassified
1400	luftloch	lufcik	26	2.30769	1.4634	1.38462	0.803837	1.30769	0.617688	1.46154	0.706018	1.42308	0.945434	15	2.13333	1.50555	1.33333	0.617213	1.26667	0.593617	1.6	0.736788	1.33333	0.723747	11	2.54545	1.4397	1.45455	1.03573	1.36364	0.6742	1.27273	0.64667	1.54545	1.21356	1	H	none	H		N
1404	lukrativ	lukratywny	26	2.96154	1.96938	1.57692	1.02657	1.34615	0.745241	1.5	1.24097	1.30769	0.679366	14	2.5	1.99036	1.35714	0.633324	1.35714	0.841897	1.5	1.09193	1.28571	0.82542	12	3.5	1.88294	1.83333	1.33712	1.33333	0.651339	1.5	1.446	1.33333	0.492366		H	none	H		N
1412	luxus	luksusowy	26	5.26923	1.80128	1.88462	1.36607	1.76923	1.42289	1.53846	0.706018	1.69231	1.19228	15	5	1.85164	2.26667	1.62422	2.06667	1.75119	1.53333	0.63994	1.73333	1.33452	11	5.63636	1.74773	1.36364	0.6742	1.36364	0.6742	1.54545	0.8202	1.63636	1.02691	1	H	H	H		unclassified
1407	lupe	lupa	27	2.77778	1.69464	1.2963	0.724028	1.33333	0.877058	1.2963	0.6688	1.14815	0.601518	14	3.28571	1.5898	1.35714	0.633324	1.42857	0.937614	1.21429	0.425815	1.07143	0.267261	13	2.23077	1.69085	1.23077	0.83205	1.23077	0.83205	1.38462	0.869718	1.23077	0.83205	1	H	none	H		N
2252	spiegel	lustro	26	3.23077	1.60767	2.15385	1.34736	2.19231	1.49718	2.07692	1.38342	1.61538	1.44435	14	3.35714	1.86495	2.14286	1.51186	2.07143	1.38477	2.14286	1.56191	1.42857	1.15787	12	3.08333	1.31137	2.16667	1.19342	2.33333	1.66969	2	1.20605	1.83333	1.74946	1	H	none	undifferentiated		unclassified
1611	mustern	lustrować	27	1.66667	1.20894	3.07407	1.85899	2.07407	1.43918	2.96296	1.91113	2.37037	1.84283	14	1.21429	0.425815	2.85714	1.87523	2.28571	1.43734	3.07143	2.01778	2.35714	1.82323	13	2.15385	1.57301	3.30769	1.88788	1.84615	1.46322	2.84615	1.86396	2.38462	1.93815		A	none	undifferentiated		unclassified
2139	schwan	łabędzi	27	3.66667	2.01914	1.22222	0.423659	1.74074	1.34715	1.44444	0.9337	1.22222	0.57735	14	4.35714	1.7368	1.28571	0.468807	2.21429	1.57766	1.64286	1.15073	1.07143	0.267261	13	2.92308	2.10006	1.15385	0.375534	1.23077	0.83205	1.23077	0.599145	1.38462	0.767948	1	H	none	H		unclassified
1277	latein	łaciński	26	2.26923	1.73338	1.69231	1.15825	1.73077	1.18516	1.46154	0.760567	1.61538	1.35873	15	2.46667	2.03072	1.53333	0.915475	1.4	0.910259	1.46667	0.63994	1.4	0.910259	11	2	1.26491	1.90909	1.446	2.18182	1.4013	1.45455	0.934199	1.90909	1.81409	1	H	none	undifferentiated		unclassified
788	frieden	ład	26	3.96154	1.6366	1.34615	0.79711	1.23077	0.514408	1.5	1.02956	1.23077	0.815239	12	3.91667	1.62135	1.33333	0.778499	1.25	0.452267	1.08333	0.288675	1.08333	0.288675	14	4	1.7097	1.35714	0.841897	1.21429	0.578934	1.85714	1.29241	1.35714	1.08182	1	H	H	H		unclassified
1677	niedlich	ładny	27	5.74074	1.28879	1.55556	1.01274	1.55556	1.2195	1.48148	1.12217	1.44444	0.974022	14	6	1.41421	1.57143	0.937614	1.42857	0.851631	1.35714	1.08182	1.57143	1.15787	13	5.46154	1.1266	1.53846	1.1266	1.69231	1.54837	1.61538	1.19293	1.30769	0.751068		H	H	H		H
1267	ladung	ładunek	26	1.84615	1.15559	1.38462	0.752432	1.38462	0.941357	2.23077	1.79572	1.30769	0.837579	12	1.66667	0.984732	1.41667	0.668558	1.25	0.621582	2.16667	1.58592	1.08333	0.288675	14	2	1.30089	1.35714	0.841897	1.5	1.16024	2.28571	2.01642	1.5	1.09193	1	F	none	undifferentiated		unclassified
943	gutartig	łagodny	26	4.42308	1.57919	1.38462	0.803837	1.65385	1.05612	1.07692	0.271746	1.34615	0.891843	14	4.5	1.69842	1.35714	0.744946	1.57143	1.2225	1	0	1.07143	0.267261	12	4.33333	1.49747	1.41667	0.900337	1.75	0.866025	1.16667	0.389249	1.66667	1.23091		H	H	H		unclassified
1362	lindern	łagodzić	26	5	1.29615	1.30769	0.735893	1.30769	0.617688	1.30769	0.679366	1.11538	0.431455	15	5.13333	1.24595	1.13333	0.351866	1.13333	0.351866	1.2	0.414039	1.06667	0.258199	11	4.81818	1.4013	1.54545	1.03573	1.54545	0.8202	1.45455	0.934199	1.18182	0.603023		H	H	H		H
1398	luder	łajdak	27	1.18519	0.622466	4.81481	1.92228	3.85185	2.16091	3.88889	2.13638	4.81481	2.11291	14	1	0	5.64286	1.59842	4.85714	1.83375	4.78571	2.08211	5.21429	1.96815	13	1.38462	0.869718	3.92308	1.89128	2.76923	2.0064	2.92308	1.801	4.38462	2.25605	1	none	none	undifferentiated		unclassified
327	benötigen	łaknąć	26	2.73077	1.21845	1.46154	0.947872	1.88462	1.24344	1.65385	1.05612	1.76923	1.21021	12	2.66667	1.30268	1.58333	1.1645	2.25	1.28806	1.66667	1.07309	1.5	0.6742	14	2.78571	1.18831	1.35714	0.744946	1.57143	1.15787	1.64286	1.08182	2	1.51911		H	none	H		unclassified
425	brechen	łamać	26	2.03846	1.73161	3.07692	1.74179	2.92308	1.95802	4.15385	1.91191	2.69231	2.11224	13	2.07692	1.89128	2.76923	1.87767	3.15385	2.03495	4.61538	2.10311	2.61538	2.10311	13	2	1.63299	3.38462	1.60927	2.69231	1.93152	3.69231	1.6525	2.76923	2.20431		F	none	undifferentiated		unclassified
1138	kette	łańcuch	26	1.38462	0.803837	2.23077	1.65669	2.46154	1.63048	3.69231	1.97523	2.15385	1.34736	12	1.33333	0.887625	2.58333	1.83196	3	1.7581	3.91667	2.31432	2.5	1.3817	14	1.42857	0.755929	1.92857	1.49174	2	1.41421	3.5	1.69842	1.85714	1.29241	1	F	none	F		F
1795	pfote	łapa	26	3.30769	2.2763	1.57692	1.13747	1.42308	0.808608	1.65385	1.09334	1.5	1.10454	11	4.18182	2.31595	1.27273	0.904534	1.63636	1.02691	1.54545	1.03573	1.45455	0.934199	15	2.66667	2.09307	1.8	1.26491	1.26667	0.593617	1.73333	1.16292	1.53333	1.24595	1	H	none	H		unclassified
687	fangen	łapać	27	3.07407	1.93998	2.11111	1.36814	1.44444	0.800641	2.33333	1.6641	1.62963	0.966681	14	2.78571	2.11873	2.35714	1.33631	1.64286	0.928783	2.35714	1.39268	1.92857	1.14114	13	3.38462	1.75777	1.84615	1.40512	1.23077	0.599145	2.30769	1.97419	1.30769	0.630425		H	none	undifferentiated		unclassified
915	gnade	łaska	26	3.80769	2.26308	2.34615	2.09652	1.96154	1.68477	2.03846	1.86506	2.15385	1.99384	12	4.25	2.13733	2.16667	1.89896	2	1.53741	2	1.85864	2.16667	2.03753	14	3.42857	2.37663	2.5	2.31218	1.92857	1.85904	2.07143	1.94004	2.14286	2.0327	1	H	none	H		unclassified
238	bad	łazienka	26	3.30769	1.69161	1.15385	0.367946	1.15385	0.464095	1.42308	0.902134	1.38462	0.752432	14	3	1.7097	1	0	1	0	1.28571	0.82542	1.28571	0.82542	12	3.66667	1.66969	1.33333	0.492366	1.33333	0.651339	1.58333	0.996205	1.5	0.6742		H	H	H		unclassified
1850	prater	Łazienki	27	4.7037	1.99644	1.11111	0.423659	1.25926	0.594371	1.07407	0.26688	1.22222	0.697982	14	5.14286	2.31574	1.07143	0.267261	1.21429	0.578934	1.07143	0.267261	1.28571	0.82542	13	4.23077	1.5359	1.15385	0.5547	1.30769	0.630425	1.07692	0.27735	1.15385	0.5547	1	H	H	H		unclassified
2592	verbinden	łączyć	27	3.81481	1.49453	1.66667	1.1094	1.92593	1.32798	1.77778	1.1547	1.66667	1.07417	14	3.71429	1.63747	1.5	0.85485	1.71429	1.13873	1.92857	1.14114	1.71429	1.13873	13	3.92308	1.38212	1.84615	1.3445	2.15385	1.51911	1.61538	1.19293	1.61538	1.04391		H	H	H		unclassified
2786	wiese	łąka	26	5.46154	1.5292	1.07692	0.392232	1.23077	0.710363	1.15385	0.464095	1.23077	0.815239	11	5.72727	1.48936	1	0	1.36364	0.924416	1.09091	0.301511	1.36364	1.20605	15	5.26667	1.57963	1.13333	0.516398	1.13333	0.516398	1.2	0.560612	1.13333	0.351866	1	H	H	H		H
1402	lug	łgać	26	1.11538	0.431455	4.57692	2.00346	3.5	2.42074	2.73077	2.20105	5.03846	1.68477	12	1.08333	0.288675	5	1.7581	3.83333	2.28963	2.16667	1.94625	5.08333	1.67649	14	1.14286	0.534522	4.21429	2.19014	3.21429	2.57737	3.21429	2.35922	5	1.75412		D	none	undifferentiated		unclassified
1162	klette	łopian	26	2.34615	1.78756	1.26923	0.724303	1.26923	0.724303	1.26923	0.724303	1.34615	0.845804	11	2.72727	1.95402	1.36364	0.924416	1.27273	0.904534	1.36364	0.924416	1.54545	1.21356	15	2.06667	1.66762	1.2	0.560612	1.26667	0.593617	1.2	0.560612	1.2	0.414039	1	H	none	H		N
580	elch	łoś	26	4.07692	1.80938	1.46154	1.02882	1.53846	1.1395	2	1.35647	1.30769	0.970329	11	3.90909	1.92117	1.36364	0.6742	1.63636	1.20605	1.90909	1.30035	1.09091	0.301511	15	4.2	1.78085	1.53333	1.24595	1.46667	1.12546	2.06667	1.43759	1.46667	1.24595	1	H	H	H		unclassified
1405	lump	łotr	26	1.38462	0.803837	3.57692	2.08179	3.11538	2.23297	3.73077	2.05052	3.26923	2.20105	11	1.45455	0.8202	3.90909	2.2563	3.72727	2.49363	4.54545	2.16165	3.54545	2.29624	15	1.33333	0.816497	3.33333	1.98806	2.66667	1.98806	3.13333	1.80739	3.06667	2.18654	1	F	none	undifferentiated		unclassified
417	boot	łódź	26	3.73077	2.25491	1.15385	0.464095	1.57692	0.902134	2.26923	1.61388	1.26923	0.77757	12	3.75	2.49089	1	0	1.5	0.797724	1.91667	1.1645	1	0	14	3.71429	2.12779	1.28571	0.61125	1.64286	1.00821	2.57143	1.91007	1.5	1.01905	1	H	none	H		unclassified
363	bett	łóżko	26	5.26923	1.75631	1.19231	0.800961	1.69231	1.08699	1.57692	0.986836	1.19231	0.633671	12	5	2.08893	1.08333	0.288675	1.66667	1.07309	1.58333	0.996205	1.08333	0.288675	14	5.5	1.45444	1.28571	1.06904	1.71429	1.13873	1.57143	1.01635	1.28571	0.82542	1	H	H	H		H
411	bogen	łuk	26	2.65385	1.6957	1.57692	1.10175	1.34615	0.689481	2.30769	1.76112	1.30769	1.19228	14	2.14286	1.56191	1.21429	0.425815	1.28571	0.61125	2.35714	1.82323	1	0	12	3.25	1.71226	2	1.4771	1.41667	0.792961	2.25	1.76455	1.66667	1.72328	1	H	none	undifferentiated		unclassified
1383	löffel	łyżka	27	2.44444	1.73944	1.37037	0.883531	1.25926	0.712125	1.18519	0.557262	1.07407	0.26688	14	2.5	1.99036	1.28571	0.82542	1.14286	0.534522	1	0	1	0	13	2.38462	1.50214	1.46154	0.967418	1.38462	0.869718	1.38462	0.767948	1.15385	0.375534	1	H	none	H		N
2464	träne	łza	27	1.85185	1.13353	2.74074	1.99215	5.07407	1.68537	3.44444	1.90815	1.81481	1.6181	14	1.5	0.759555	3.21429	2.08211	5.71429	1.63747	3.64286	2.02322	2	1.79743	13	2.23077	1.36344	2.23077	1.83275	4.38462	1.50214	3.23077	1.83275	1.61538	1.44559	1	S	none	S		S
1140	keule	maczuga	27	2.37037	1.77911	2.18519	1.75493	1.33333	0.784465	2.59259	1.82418	1.25926	0.712125	14	2.07143	1.59153	2.35714	2.06089	1.42857	0.937614	2.5	1.82925	1.14286	0.363137	13	2.69231	1.97419	2	1.41421	1.23077	0.599145	2.69231	1.88788	1.38462	0.960769	1	F	none	blended	FHA	unclassified
1421	madonna	Madonna	26	3.38462	1.85638	1.76923	1.45073	1.73077	1.37281	1.57692	0.986836	1.42308	1.30148	15	2.86667	1.45733	1.93333	1.16292	1.8	1.01419	1.8	1.01419	1.33333	0.816497	11	4.09091	2.16585	1.54545	1.80907	1.63636	1.80404	1.27273	0.904534	1.54545	1.80907	1	H	none	H		unclassified
1422	mafia	mafia	26	1.23077	0.815239	3.57692	2.38618	3.07692	2.279	4.84615	2.11078	3.11538	2.25081	11	1	0	3.72727	2.57258	3.63636	2.24823	5.45455	2.06706	4	2.19089	15	1.4	1.0556	3.46667	2.32584	2.66667	2.28869	4.4	2.09762	2.46667	2.13363	1	F	none	undifferentiated		unclassified
1423	magazin	magazynować	26	2.26923	1.6866	2.03846	1.66086	1.96154	1.58697	1.92308	1.74179	1.76923	1.45073	14	1.57143	1.08941	2.21429	2.00686	1.78571	1.84718	2	2	1.78571	1.52812	12	3.08333	1.92865	1.83333	1.19342	2.16667	1.2673	1.83333	1.4668	1.75	1.42223	1	H	none	undifferentiated		unclassified
1427	magie	magia	26	4.19231	2.13578	1.65385	1.64784	1.73077	1.66271	2.88462	1.90425	1.73077	1.63848	12	4.16667	2.36771	1.66667	1.72328	1.58333	1.72986	2.58333	1.83196	1.41667	0.900337	14	4.21429	2.00686	1.64286	1.64584	1.85714	1.65748	3.14286	1.9945	2	2.0755	1	H	none	undifferentiated		unclassified
1429	magisch	magiczny	26	4.96154	1.66086	1.23077	0.429669	1.30769	0.549125	2.07692	1.54721	1.30769	0.549125	14	5.07143	2.09263	1.14286	0.363137	1.28571	0.61125	2.07143	1.8172	1.21429	0.425815	12	4.83333	1.02986	1.33333	0.492366	1.33333	0.492366	2.08333	1.24011	1.41667	0.668558		H	H	H		unclassified
1428	magier	magik	26	3.57692	1.60432	1.38462	1.0612	1.65385	1.29437	2.07692	1.67148	1.53846	1.42073	13	3.46154	2.02548	1.15385	0.375534	1.69231	1.4367	2.61538	2.14237	1.61538	1.66024	13	3.69231	1.1094	1.61538	1.44559	1.61538	1.19293	1.53846	0.77625	1.46154	1.19829	1	H	none	H		unclassified
1430	magma	magma	26	1.84615	1.51505	1.38462	1.0612	1.5	0.989949	2.61538	1.72225	1.69231	1.40767	12	1.66667	1.23091	1.25	0.452267	1.5	0.797724	2.25	1.48477	1.33333	0.651339	14	2	1.75412	1.5	1.40055	1.5	1.16024	2.92857	1.89997	2	1.79743	1	F	none	undifferentiated		F
1431	magnet	magnes	26	2.19231	1.744	1.34615	0.891843	1.11538	0.325813	1.11538	0.325813	1.03846	0.196116	12	1.58333	0.900337	1.08333	0.288675	1.08333	0.288675	1.08333	0.288675	1	0	14	2.71429	2.12779	1.57143	1.15787	1.14286	0.363137	1.14286	0.363137	1.07143	0.267261	1	H	none	undifferentiated		N
1437	mai	maj	26	5.57692	1.27037	1.30769	0.970329	1.92308	1.57285	1.34615	0.891843	1.30769	0.788377	13	6	1	1.30769	1.1094	2.07692	1.89128	1.15385	0.5547	1.23077	0.599145	13	5.15385	1.40512	1.30769	0.85485	1.76923	1.23517	1.53846	1.1266	1.38462	0.960769		H	H	H		H
2636	vermögen	majętny	26	4.38462	1.87781	2.19231	1.57529	2.26923	1.77894	2.69231	1.78369	2	1.6	13	4.30769	1.88788	2.38462	1.85016	2.84615	2.23033	3.15385	2.11527	2.23077	1.87767	13	4.46154	1.94145	2	1.29099	1.69231	0.947331	2.23077	1.30089	1.76923	1.30089	1	H	none	H		unclassified
1440	makaber	makabryczny	26	1.26923	1.18516	2.65385	2.05801	3.61538	2.02142	4.53846	2.15835	3.88462	2.04601	12	1.5	1.73205	2.75	2.13733	3	2	5.08333	2.02073	4.16667	2.03753	14	1.07143	0.267261	2.57143	2.06488	4.14286	1.95555	4.07143	2.23484	3.64286	2.09788		F	none	undifferentiated		unclassified
1692	nudel	makaron	27	4.37037	1.84283	1.22222	0.57735	1.11111	0.320256	1.14815	0.456045	1.03704	0.19245	14	4.64286	1.86495	1.21429	0.578934	1.14286	0.363137	1.21429	0.578934	1	0	13	4.07692	1.84669	1.23077	0.599145	1.07692	0.27735	1.07692	0.27735	1.07692	0.27735	1	H	H	H		unclassified
1443	makler	makler	27	2.51852	1.98785	2.11111	1.18754	1.59259	1.08342	2.37037	1.64429	1.66667	1.03775	14	1.92857	1.49174	2	1.03775	1.42857	0.937614	2.64286	1.90575	1.64286	0.928783	13	3.15385	2.30384	2.23077	1.36344	1.76923	1.23517	2.07692	1.32045	1.69231	1.18213	1	H	none	undifferentiated		unclassified
1558	mohn	makowy	26	3.15385	1.8263	1.11538	0.325813	1.11538	0.325813	1.15385	0.543493	1.11538	0.325813	12	3.41667	1.67649	1.25	0.452267	1.25	0.452267	1.33333	0.778499	1.25	0.452267	14	2.92857	1.97929	1	0	1	0	1	0	1	0	1	H	H	H		N
1483	maximum	maksimum	27	4.51852	2.00711	1.81481	1.41522	1.66667	1.44115	1.88889	1.47631	1.59259	1.39392	14	4.14286	1.87523	1.85714	1.09945	1.64286	1.08182	1.78571	1.12171	1.5	1.09193	13	4.92308	2.13937	1.76923	1.73944	1.69231	1.79743	2	1.82574	1.69231	1.70219	1	H	H	H		unclassified
1482	maximal	maksymalny	26	4.23077	2.1965	1.88462	1.33647	1.53846	1.1395	2	1.29615	1.57692	1.33186	11	4.27273	2.41209	2	1.41421	1.45455	0.934199	2.27273	1.48936	1.27273	0.904534	15	4.2	2.11119	1.8	1.32017	1.6	1.29835	1.8	1.14642	1.8	1.56753		H	H	H		unclassified
1117	karton	makulatura	27	2	1.38675	1.59259	1.00992	1.22222	0.57735	1.33333	0.877058	1.44444	1.1209	14	2.14286	1.51186	1.57143	0.851631	1.21429	0.578934	1.35714	0.928783	1.35714	0.841897	13	1.84615	1.28103	1.61538	1.19293	1.23077	0.599145	1.30769	0.85485	1.53846	1.39137	1	H	none	undifferentiated		N
1444	malaria	malaria	26	1.23077	1.1767	3.46154	2.33634	4.34615	2.24397	5.34615	1.8098	5.03846	1.98959	12	1	0	3.58333	2.46644	4.08333	2.31432	5.75	1.42223	5.5	1.78377	14	1.42857	1.60357	3.35714	2.30742	4.57143	2.24343	5	2.0755	4.64286	2.13423	1	F	none	undifferentiated		unclassified
1445	maler	malarz	27	3.37037	1.90441	1.55556	0.974022	1.81481	1.2415	1.25926	0.446576	1.2963	0.724028	14	3.85714	2.0327	1.57143	1.15787	1.57143	0.937614	1.28571	0.468807	1.28571	0.61125	13	2.84615	1.67562	1.53846	0.77625	2.07692	1.49786	1.23077	0.438529	1.30769	0.85485	1	H	none	H		unclassified
1010	himbeere	malinowy	26	4.92308	1.38342	1.07692	0.271746	1.23077	0.710363	1.07692	0.271746	1.19231	0.401918	15	4.93333	1.38701	1.06667	0.258199	1.06667	0.258199	1.06667	0.258199	1.2	0.414039	11	4.90909	1.446	1.09091	0.301511	1.45455	1.03573	1.09091	0.301511	1.18182	0.40452	1	H	H	H		H
1040	humorlos	malkontent	26	1.46154	1.33359	2.84615	1.75937	1.92308	1.44009	1.69231	1.37896	2.23077	1.50486	12	1.66667	1.77525	3	1.7581	2.08333	1.72986	1.91667	1.78164	2.25	1.81534	14	1.28571	0.82542	2.71429	1.81568	1.78571	1.18831	1.5	0.94054	2.21429	1.25137		A	none	undifferentiated		A
1446	malerei	malować	26	4.65385	1.85348	1.5	1.02956	1.73077	1.31325	1.30769	0.884047	1.26923	0.603834	11	4.90909	1.8684	1.54545	1.21356	1.90909	1.57826	1.45455	1.21356	1.18182	0.40452	15	4.46667	1.88478	1.46667	0.915475	1.6	1.12122	1.2	0.560612	1.33333	0.723747	1	H	H	H		unclassified
2812	wortkarg	małomówny	27	1.7037	1.2954	2.7037	1.56438	3	2.0381	2.74074	1.85208	1.66667	1.1767	14	1.64286	0.841897	2.71429	1.81568	2.5	1.95133	2.5	1.87083	1.42857	0.937614	13	1.76923	1.69085	2.69231	1.31559	3.53846	2.06621	3	1.87083	1.92308	1.38212		S	none	blended	SAF	unclassified
63	affe	małpa	27	3.40741	2.11695	1.37037	0.791695	1.18519	0.557262	1.96296	1.55617	1.77778	1.50214	14	2.78571	2.00686	1.35714	0.841897	1.14286	0.534522	2.14286	1.74784	1.92857	1.85904	13	4.07692	2.10006	1.38462	0.767948	1.23077	0.599145	1.76923	1.36344	1.61538	1.04391	1	H	none	H		unclassified
2771	wenig	mały	26	2.53846	1.74885	1.57692	1.02657	1.76923	1.1767	1.5	1.02956	1.38462	0.803837	12	2.75	1.48477	1.25	0.452267	1.66667	0.984732	1.33333	0.492366	1.25	0.621582	14	2.35714	1.98483	1.85714	1.29241	1.85714	1.35062	1.64286	1.33631	1.5	0.94054		H	none	undifferentiated		unclassified
980	heirat	małżeński	26	4.73077	1.61388	1.73077	1.11562	2	1.29615	2.11538	1.3062	1.30769	0.735893	15	4.66667	1.71825	1.66667	0.816497	1.86667	1.24595	2.4	1.45406	1.13333	0.351866	11	4.81818	1.53741	1.81818	1.47093	2.18182	1.4013	1.72727	1.00905	1.54545	1.03573	1	H	H	H		unclassified
819	gatte	małżonek	26	5.26923	1.86671	1.88462	1.17735	2	1.46969	2.03846	1.24838	1.57692	1.02657	15	5.13333	1.68466	2.06667	1.16292	1.8	1.08233	2.13333	1.45733	1.53333	0.99043	11	5.45455	2.16165	1.63636	1.20605	2.27273	1.90215	1.90909	0.94388	1.63636	1.12006	1	H	H	H		unclassified
1447	mama	mama	27	6.33333	1.14354	1.74074	1.1633	2.03704	1.42725	1.62963	1.04323	1.14815	0.456045	14	6.28571	1.20439	1.57143	1.01635	2	1.7097	1.42857	0.937614	1.21429	0.578934	13	6.38462	1.1209	1.92308	1.32045	2.07692	1.11516	1.84615	1.14354	1.07692	0.27735	1	H	H	H		H
1307	leiern	mamrotać	26	1.42308	0.757526	2.96154	1.6366	2.30769	1.54322	2.30769	1.69161	1.92308	1.3542	15	1.33333	0.48795	3.13333	1.40746	2.33333	1.39728	2.2	1.37321	1.86667	0.99043	11	1.54545	1.03573	2.72727	1.95402	2.27273	1.79393	2.45455	2.11488	2	1.78885		A	none	undifferentiated		A
1617	mutti	mamusia	26	5.30769	1.73826	2.19231	1.41476	1.84615	1.22286	1.26923	0.666795	1.19231	0.491466	14	5.14286	2.14322	2.64286	1.69193	1.92857	1.43925	1.14286	0.363137	1.35714	0.633324	12	5.5	1.16775	1.66667	0.778499	1.75	0.965307	1.41667	0.900337	1	0	1	H	H	H		unclassified
1448	manager	manager	27	3.2963	1.95753	2.14815	1.56165	1.96296	1.45395	2.18519	1.33119	1.62963	1.07946	14	3.14286	1.61041	2.85714	1.61041	2.57143	1.6968	2.5	1.45444	2	1.30089	13	3.46154	2.3315	1.38462	1.1209	1.30769	0.751068	1.84615	1.14354	1.23077	0.599145	1	H	none	undifferentiated		unclassified
1451	mango	mango	26	4.73077	1.88802	1.38462	1.0612	1.19231	0.567044	1.23077	0.651625	1.19231	0.567044	12	5.41667	2.06522	1.25	0.621582	1.25	0.621582	1.33333	0.778499	1.16667	0.57735	14	4.14286	1.56191	1.5	1.3445	1.14286	0.534522	1.14286	0.534522	1.21429	0.578934	1	H	H	H		unclassified
1452	manie	maniakalny	26	1.73077	1.18516	2.5	1.70294	2.19231	1.41476	4.15385	1.7133	2.76923	1.7276	12	1.91667	1.31137	2.16667	1.64225	2.33333	1.61433	4.41667	1.62135	2.66667	1.82574	14	1.57143	1.08941	2.78571	1.76193	2.07143	1.26881	3.92857	1.8172	2.85714	1.70326	1	F	none	F		F
1453	manko	manko	26	1.38462	0.803837	2.26923	1.82335	2.26923	1.92993	2.03846	1.61197	1.84615	1.54123	12	1.75	1.05529	2.58333	1.62135	2.41667	1.72986	2.33333	1.49747	1.91667	1.37895	14	1.07143	0.267261	2	2	2.14286	2.14322	1.78571	1.71772	1.78571	1.71772	1	none	none	undifferentiated		unclassified
47	abweg	manowce	26	1.96154	1.79957	3.34615	2.09652	2.84615	1.97367	3.30769	2.14978	2.19231	2.00038	12	2	1.95402	3.5	2.35488	2.58333	1.88092	3.25	1.91288	2.5	2.31595	14	1.92857	1.73046	3.21429	1.92867	3.07143	2.09263	3.35714	2.40535	1.92857	1.73046	1	A	none	undifferentiated		unclassified
1115	karte	mapa	26	3.84615	2.23951	1.5	1.10454	1.46154	1.02882	1.69231	1.15825	1.23077	0.815239	11	3.81818	2.27236	1.63636	1.43337	1.45455	0.934199	1.72727	1.10371	1.27273	0.904534	15	3.86667	2.29492	1.4	0.828079	1.46667	1.12546	1.66667	1.23443	1.2	0.774597	1	H	none	H		unclassified
1560	möhre	marchwiowy	26	3.23077	1.92474	1.19231	0.800961	1.11538	0.588348	1.15385	0.784465	1.53846	0.811456	12	3.66667	2.22928	1.08333	0.288675	1	0	1	0	1.33333	0.492366	14	2.85714	1.61041	1.28571	1.06904	1.21429	0.801784	1.28571	1.06904	1.71429	0.99449	1	H	none	H		unclassified
1460	marke	marka	26	2.23077	1.60767	1.53846	1.42073	1.30769	0.788377	1.23077	0.58704	1.61538	1.41639	12	2	1.41421	1.66667	1.23091	1.5	1	1.5	0.797724	1.66667	1.23091	14	2.42857	1.78516	1.42857	1.60357	1.14286	0.534522	1	0	1.57143	1.60357	1	H	none	undifferentiated		N
1465	marxist	marksista	26	1.30769	0.837579	2.34615	1.5477	1.69231	1.15825	1.92308	1.3542	2.57692	1.85845	12	1.16667	0.389249	2	0.953463	1.58333	0.668558	1.91667	1.08362	2.25	1.48477	14	1.42857	1.08941	2.64286	1.90575	1.78571	1.47693	1.92857	1.59153	2.85714	2.14322	1	D	none	undifferentiated		unclassified
2096	schlecht	marny	26	1.15385	0.612686	2.42308	1.62906	3.53846	1.81617	1.92308	1.38342	2.80769	1.85514	12	1.25	0.866025	2.08333	1.50504	3	1.41421	1.58333	0.996205	2.33333	1.61433	14	1.07143	0.267261	2.71429	1.72888	4	2.0381	2.21429	1.62569	3.21429	2.00686		S	none	undifferentiated		S
2232	sorge	martwić	26	1.34615	1.05612	3.15385	1.75937	5.15385	1.61722	4.5	1.81659	2.38462	1.89899	13	1.15385	0.5547	3.38462	1.80455	5.84615	1.28103	5	1.82574	2.61538	2.2188	13	1.53846	1.39137	2.92308	1.75412	4.46154	1.6641	4	1.73205	2.15385	1.57301	1	S	none	blended	SF	unclassified
2449	tot	martwy	26	1.26923	1.04145	2.84615	2.0138	5.46154	1.94383	5.11538	1.88312	3.53846	2.0829	15	1.13333	0.516398	2.8	1.97122	5.53333	1.80739	5.13333	1.76743	3.6	2.09762	11	1.45455	1.50756	2.90909	2.16585	5.36364	2.2033	5.09091	2.11918	3.45455	2.16165		S	none	blended	SF	unclassified
2699	vorstellen	marzyć	27	5.62963	1.69043	1.37037	0.883531	2.03704	1.76464	1.77778	1.33973	1.03704	0.19245	14	6	1.4676	1.28571	0.61125	2.07143	2.05555	1.57143	1.34246	1.07143	0.267261	13	5.23077	1.87767	1.46154	1.1266	2	1.47196	2	1.35401	1	0		H	H	H		unclassified
1470	masse	masa	26	1.96154	1.39945	2.11538	1.68112	2.03846	1.56156	1.73077	1.21845	2.38462	2.3337	12	2	1.65145	1.91667	1.72986	1.75	1.42223	1.33333	0.778499	2.16667	2.16725	14	1.92857	1.20667	2.28571	1.68379	2.28571	1.68379	2.07143	1.43925	2.57143	2.53329	1	D	none	undifferentiated		unclassified
1469	massaker	masakra	26	1.19231	0.800961	4.23077	2.32048	4.30769	2.20489	4.80769	2.00038	3.46154	2.12096	11	1	0	4.90909	2.21154	5.09091	1.8684	5.63636	1.50151	3.54545	2.38175	15	1.33333	1.04654	3.73333	2.34419	3.73333	2.31352	4.2	2.14476	3.4	1.99284	1	F	none	undifferentiated		unclassified
1468	massage	masaż	26	5.5	1.44914	1.19231	0.633671	1.07692	0.271746	1.19231	0.491466	1.19231	0.491466	15	5.6	1.45406	1.33333	0.816497	1.13333	0.351866	1.13333	0.351866	1.13333	0.351866	11	5.36364	1.50151	1	0	1	0	1.27273	0.64667	1.27273	0.64667	1	H	H	H		H
1467	maske	maska	27	2.11111	1.47631	2.44444	1.64862	2.03704	1.60484	2.74074	1.70051	1.96296	1.48016	14	2.14286	1.70326	2.21429	1.52812	2.07143	1.59153	2.5	1.55662	1.57143	1.15787	13	2.07692	1.25576	2.69231	1.79743	2	1.68325	3	1.87083	2.38462	1.7097	1	F	none	undifferentiated		unclassified
2385	tarnen	maskować	27	1.7037	1.46274	2.66667	1.6641	2.48148	1.36918	2.14815	1.43322	2.25926	1.65466	14	2.21429	1.88837	2.92857	1.89997	2.14286	1.29241	1.71429	1.13873	2.57143	1.94992	13	1.15385	0.375534	2.38462	1.38675	2.84615	1.40512	2.61538	1.60927	1.92308	1.25576		A	none	undifferentiated		unclassified
1471	massiv	masywny	26	2.07692	1.67148	1.76923	1.24283	1.57692	1.20576	1.80769	1.35703	1.76923	1.2746	12	1.66667	1.1547	1.66667	1.23091	1.5	1.24316	1.16667	0.389249	1.58333	1.08362	14	2.42857	1.98898	1.85714	1.29241	1.64286	1.21574	2.35714	1.64584	1.92857	1.43925		H	none	undifferentiated		N
2072	scheusal	maszkara	27	1.37037	0.687702	2.40741	2.0803	3	1.86052	3.22222	2.13638	3.92593	2.25194	14	1.14286	0.363137	3.28571	2.36736	3.71429	2.09132	3.85714	2.38125	4.07143	2.30265	13	1.61538	0.869718	1.46154	1.19829	2.23077	1.23517	2.53846	1.6641	3.76923	2.27866	1	D	none	undifferentiated		unclassified
2025	salbe	maść	26	2.30769	1.40767	1.69231	1.04954	1.80769	1.23351	1.88462	1.17735	2.23077	1.24283	15	2.46667	1.50555	1.6	0.910259	1.66667	0.899735	2.06667	1.27988	2.33333	1.29099	11	2.09091	1.30035	1.81818	1.25045	2	1.61245	1.63636	1.02691	2.09091	1.22103	1	H	none	undifferentiated		unclassified
455	butter	maślany	26	3	1.95959	1.5	1.24097	1.23077	0.815239	1.23077	0.815239	2.19231	2.13578	12	3.33333	2.05971	1.58333	1.37895	1.25	0.866025	1.25	0.866025	3	2.5937	14	2.71429	1.89852	1.42857	1.15787	1.21429	0.801784	1.21429	0.801784	1.5	1.40055	1	H	none	undifferentiated		unclassified
1475	matte	mata	27	2.92593	2.07412	1.2963	0.868899	1.18519	0.68146	1.44444	0.9337	1.18519	0.557262	14	2.92857	2.23484	1.14286	0.534522	1.14286	0.534522	1.28571	0.726273	1.14286	0.534522	13	2.92308	1.97744	1.46154	1.1266	1.23077	0.83205	1.61538	1.1209	1.23077	0.599145	1	H	none	H		N
1473	matratze	materac	26	3.61538	2.19229	1.42308	0.986836	1.65385	1.29437	1.42308	0.986836	1.61538	1.16883	13	4.23077	2.35067	1.23077	0.438529	1.92308	1.44115	1.69231	1.25064	1.38462	0.869718	13	3	1.91485	1.61538	1.3253	1.38462	1.1209	1.15385	0.5547	1.84615	1.40512	1	H	none	H		unclassified
1616	mutter	matka	26	5.07692	2.01838	1.76923	1.1422	2.19231	1.52366	2.07692	1.52113	1.19231	0.800961	12	4.91667	2.10878	1.66667	0.984732	1.83333	1.11464	2	1.12815	1.33333	1.1547	14	5.21429	2.00686	1.85714	1.29241	2.5	1.7867	2.14286	1.83375	1.07143	0.267261	1	H	H	H		unclassified
1474	matt	matowy	27	2.81481	2.11291	1.44444	0.974022	1.7037	1.20304	1.37037	0.966681	1.51852	1.12217	14	3.21429	2.25929	1.5	1.16024	1.5	1.16024	1.42857	1.08941	1.42857	1.08941	13	2.38462	1.93815	1.38462	0.767948	1.92308	1.25576	1.30769	0.85485	1.61538	1.19293		H	none	H		unclassified
24	abitur	matura	27	4.07407	2.16486	2.81481	1.84051	2.62963	2.04089	4.07407	2.26895	2.18519	1.86129	14	3.5	1.9115	3.35714	1.82323	3.42857	1.98898	4.64286	1.94569	2.71429	1.93862	13	4.69231	2.32324	2.23077	1.73944	1.76923	1.7867	3.46154	2.50384	1.61538	1.66024	1	none	none	undifferentiated		unclassified
1172	klugheit	mądrość	26	4.61538	1.81278	1.46154	1.27219	2.11538	2.02636	1.69231	1.54322	1.42308	1.39063	12	4.08333	1.97523	1.25	0.621582	1.58333	1.44338	1.33333	0.887625	1	0	14	5.07143	1.59153	1.64286	1.64584	2.57143	2.37663	2	1.92154	1.78571	1.84718	1	H	H	H		unclassified
2515	übelkeit	mdłości	26	1.19231	0.633671	3	1.54919	3.5	2.12132	4.30769	2.1683	4.65385	2.03848	15	1.06667	0.258199	2.93333	1.57963	3.6	2.38447	4.46667	2.29492	4.66667	2.19306	11	1.36364	0.924416	3.09091	1.57826	3.36364	1.80404	4.09091	2.07145	4.63636	1.91169	1	D	none	undifferentiated		unclassified
1576	moos	mech	27	3.2963	2.01561	1.33333	0.784465	1.51852	1.18874	1.33333	0.679366	1.59259	0.930643	14	2.92857	1.89997	1.42857	0.937614	1.5	1.09193	1.28571	0.468807	1.5	0.650444	13	3.69231	2.13638	1.23077	0.599145	1.53846	1.33012	1.38462	0.869718	1.69231	1.18213	1	H	none	H		unclassified
1484	mechanik	mechaniczny	27	2.22222	1.5525	1.62963	1.18153	1.77778	1.25064	2.40741	1.3376	1.77778	1.2195	14	2.21429	1.67233	1.85714	1.40642	2	1.30089	2.64286	1.33631	2.14286	1.35062	13	2.23077	1.48064	1.38462	0.869718	1.53846	1.19829	2.15385	1.3445	1.38462	0.960769	1	F	none	undifferentiated		unclassified
1485	medaille	medal	26	5.53846	1.60576	1.5	1.17473	1.34615	0.745241	1.11538	0.325813	1	0	15	5.33333	1.79947	1.4	0.828079	1.46667	0.833809	1.2	0.414039	1	0	11	5.81818	1.32802	1.63636	1.5667	1.18182	0.603023	1	0	1	0	1	H	H	H		H
1486	medizin	medyczny	26	2.5	2.02485	2.07692	1.83135	1.92308	1.16355	3.38462	2.19229	2.53846	1.85969	12	2.16667	1.89896	2.25	2.00567	1.75	0.965307	3.75	2.17945	2.25	2.0505	14	2.78571	2.15473	1.92857	1.73046	2.07143	1.32806	3.07143	2.23484	2.78571	1.71772	1	F	none	undifferentiated		unclassified
1505	mephisto	mefisto	26	1.84615	1.37673	2.19231	2.03998	2.19231	1.95998	2.92308	2.17114	2.34615	2.09652	12	1.5	1	2.08333	2.31432	2.08333	1.97523	2.66667	2.10339	1.83333	1.74946	14	2.14286	1.61041	2.28571	1.85757	2.28571	2.01642	3.14286	2.28228	2.78571	2.32639	1	F	none	undifferentiated		unclassified
2746	wehmut	melancholia	26	1.88462	1.27521	2.46154	1.70249	5	2.13542	3.03846	1.98959	1.88462	1.24344	15	1.93333	1.43759	2.46667	1.84649	5.46667	1.99523	3.2	2.04241	1.93333	1.16292	11	1.81818	1.07872	2.45455	1.57249	4.36364	2.24823	2.81818	1.99089	1.81818	1.4013	1	S	none	S		S
1498	melodram	melodramat	27	2.14815	1.35032	2.18519	1.38778	3.66667	1.96116	2.22222	2.04438	1.96296	1.62863	14	1.85714	1.09945	2	1.1767	3.5	2.10311	2.07143	2.05555	1.28571	0.468807	13	2.46154	1.56074	2.38462	1.60927	3.84615	1.86396	2.38462	2.10311	2.69231	2.09701	1	S	none	S		S
1497	melodie	melodyjny	26	5.23077	1.60767	1.15385	0.367946	1.53846	1.17408	1	0	1	0	11	5.63636	1.20605	1.27273	0.467099	2	1.67332	1	0	1	0	15	4.93333	1.83095	1.06667	0.258199	1.2	0.414039	1	0	1	0	1	H	H	H		H
1499	melone	melon	26	4.34615	2.15299	1.42308	1.39063	1.23077	0.815239	1.15385	0.612686	1.07692	0.392232	13	4.69231	2.42846	1.53846	1.6641	1.07692	0.27735	1	0	1	0	13	4	1.87083	1.30769	1.1094	1.38462	1.1209	1.30769	0.85485	1.15385	0.5547	1	H	H	H		unclassified
1504	mentor	mentor	26	3.92308	1.83135	1.65385	1.19808	1.73077	1.15092	1.80769	1.20064	1.65385	1.29437	12	3.83333	1.4668	1.5	1	1.75	1.05529	1.75	0.965307	1.75	1.13818	14	4	2.14834	1.78571	1.3688	1.71429	1.26665	1.85714	1.40642	1.57143	1.45255	1	H	H	H		unclassified
1508	metall	metalowy	26	1.73077	1.31325	1.76923	1.30561	1.76923	1.36551	1.96154	1.6366	1.57692	1.20576	12	1.66667	1.23091	2.08333	1.62135	2.08333	1.67649	2.58333	2.15146	1.41667	0.900337	14	1.78571	1.42389	1.5	0.94054	1.5	1.01905	1.42857	0.755929	1.71429	1.43734	1	F	none	undifferentiated		N
1472	maßnahme	metoda	26	2.80769	1.85514	1.73077	1.28243	1.53846	1.1395	1.92308	1.41204	1.46154	1.02882	12	2.08333	1.24011	2	1.70561	1.5	1.16775	2	1.70561	1.33333	0.887625	14	3.42857	2.1018	1.5	0.759555	1.57143	1.15787	1.85714	1.16732	1.57143	1.15787	1	H	none	undifferentiated		unclassified
1509	meter	metr	26	1.69231	1.51708	1.15385	0.464095	1.15385	0.464095	1.15385	0.543493	1.07692	0.392232	12	2.08333	1.97523	1.25	0.621582	1.16667	0.57735	1.33333	0.778499	1.16667	0.57735	14	1.35714	0.928783	1.07143	0.267261	1.14286	0.363137	1	0	1	0	1	H	none	undifferentiated		N
1594	möwe	mewa	26	3.69231	2.03508	1.84615	1.37673	2	1.52315	1.42308	0.808608	1.46154	0.811456	14	3.57143	2.20887	1.42857	1.08941	1.71429	1.63747	1.21429	0.578934	1.21429	0.578934	12	3.83333	1.89896	2.33333	1.557	2.33333	1.37069	1.66667	0.984732	1.75	0.965307	1	H	none	H		unclassified
1770	pein	męczarnia	26	1	0	4.23077	1.86135	4.76923	1.92474	4.65385	2.07735	3.53846	2.13973	14	1	0	3.85714	1.65748	5.14286	1.91581	4.78571	2.15473	3.07143	2.1649	12	1	0	4.66667	2.05971	4.33333	1.92275	4.5	2.06706	4.08333	2.06522	1	S	none	undifferentiated		unclassified
1464	martern	męczyć	27	1.74074	1.09519	3.51852	1.78391	3.22222	1.94804	2.74074	1.93336	2.77778	2.06311	14	1.71429	0.99449	4.28571	1.63747	4.21429	1.71772	3.35714	1.94569	3.5	2.06621	13	1.76923	1.23517	2.69231	1.60128	2.15385	1.62512	2.07692	1.75412	2	1.82574		A	none	undifferentiated		unclassified
1889	qual	męka	26	1.07692	0.271746	3.53846	2.12096	4.61538	2.21046	4.30769	2.22296	3.46154	2.15835	11	1.09091	0.301511	3.36364	2.06265	5.63636	1.80404	5.09091	1.8684	3.54545	1.91644	15	1.06667	0.258199	3.66667	2.22539	3.86667	2.2318	3.73333	2.34419	3.4	2.38447	1	S	none	undifferentiated		unclassified
1454	mann	mężczyzna	26	4.65385	2.01876	2.53846	1.70249	2.96154	2.30618	2.80769	1.83345	1.46154	1.10384	15	5.26667	1.98086	3.06667	1.70992	3.53333	2.32584	3.33333	2.02367	1.53333	1.0601	11	3.81818	1.83402	1.81818	1.47093	2.18182	2.13627	2.09091	1.30035	1.36364	1.20605	1	H	none	H		unclassified
1653	neblig	mglisty	27	2.44444	1.78311	2	1.41421	2.51852	1.626	3	1.98068	1.74074	1.6075	14	2.28571	1.89852	2.14286	1.70326	2.42857	1.86936	3.42857	2.31099	1.78571	1.71772	13	2.61538	1.7097	1.84615	1.06819	2.61538	1.38675	2.53846	1.5064	1.69231	1.54837		F	none	undifferentiated		unclassified
1652	nebel	mgła	26	1.80769	1.26552	2.19231	1.3862	3.30769	1.8925	3.34615	2.11551	2	1.64924	15	1.93333	1.38701	2.06667	1.27988	3.26667	1.75119	3.53333	2.26358	1.66667	1.49603	11	1.63636	1.12006	2.36364	1.5667	3.36364	2.15744	3.09091	1.97254	2.45455	1.80907	1	F	none	undifferentiated		unclassified
2144	schwert	miecz	27	3.03704	1.97058	2.44444	1.52753	1.96296	1.42725	2.77778	1.9282	2.11111	1.73944	14	2.57143	1.94992	2.57143	1.6968	2	1.4676	3.28571	2.26779	2.57143	2.06488	13	3.53846	1.94145	2.30769	1.37747	1.92308	1.44115	2.23077	1.36344	1.61538	1.19293	1	H	none	undifferentiated		unclassified
1255	kupfer	miedziany	26	2.34615	1.64784	1.38462	0.982931	1.42308	1.02657	1.42308	0.902134	1.46154	1.24035	11	2	1.48324	1.36364	0.924416	1.45455	1.21356	1.63636	1.02691	1.18182	0.40452	15	2.6	1.76473	1.4	1.0556	1.4	0.910259	1.26667	0.798809	1.66667	1.58865	1	H	none	undifferentiated		N
2303	stelle	miejsce	27	3.48148	1.57798	1.55556	0.974022	1.48148	1.01414	1.77778	1.1547	1.40741	0.843949	14	3.71429	1.5898	1.5	1.01905	1.35714	0.633324	1.71429	1.13873	1.5	0.94054	13	3.23077	1.58923	1.61538	0.960769	1.61538	1.3253	1.84615	1.21423	1.30769	0.751068	1	H	H	H		unclassified
1566	monat	miesiąc	27	2.51852	1.55342	1.66667	1.27098	1.74074	1.31829	1.66667	1	1.25926	1.1633	14	2.5	1.6525	1.78571	1.47693	1.57143	1.15787	1.57143	1.08941	1	0	13	2.53846	1.5064	1.53846	1.05003	1.92308	1.49786	1.76923	0.926809	1.53846	1.6641	1	H	none	undifferentiated		N
2803	wohnen	mieszkać	27	4.88889	1.71718	1.51852	0.893152	1.51852	0.802418	1.7037	1.03086	1	0	14	4.92857	1.89997	1.57143	1.01635	1.5	0.759555	1.71429	1.06904	1	0	13	4.84615	1.57301	1.46154	0.77625	1.53846	0.877058	1.69231	1.03155	1	0		H	H	H		unclassified
2805	wohnung	mieszkanie	26	4.23077	1.83973	1.5	1.2083	1.69231	1.40767	1.92308	1.74179	1.11538	0.325813	12	3.75	1.81534	1.58333	1.37895	1.91667	1.72986	1.5	1.446	1.16667	0.389249	14	4.64286	1.82323	1.42857	1.08941	1.5	1.09193	2.28571	1.93862	1.07143	0.267261	1	H	H	H		unclassified
2751	weich	miękki	26	3.46154	1.98456	1.92308	1.49461	1.69231	1.40767	1.69231	1.43581	2.23077	1.90384	13	4.38462	2.10311	1.30769	0.751068	1.07692	0.27735	1.23077	0.599145	1.30769	0.85485	13	2.53846	1.39137	2.53846	1.8081	2.30769	1.79743	2.15385	1.86396	3.15385	2.23033		H	none	undifferentiated		unclassified
1609	muskel	mięsień	26	3.07692	2.05763	1.46154	0.859338	1.30769	0.788377	1.53846	0.947872	1.73077	1.4299	11	3.18182	2.44206	1.18182	0.40452	1.09091	0.301511	1.72727	1.27208	2.18182	2.0405	15	3	1.81265	1.66667	1.04654	1.46667	0.99043	1.4	0.632456	1.4	0.632456	1	H	none	H		unclassified
740	fleisch	mięso	27	3.85185	1.95534	1.48148	0.848998	1.55556	1.2195	1.40741	0.888355	1.85185	0.948833	14	3.14286	1.79131	1.64286	0.841897	1.85714	1.61041	1.5	0.94054	1.78571	0.974961	13	4.61538	1.89466	1.30769	0.85485	1.23077	0.438529	1.30769	0.85485	1.92308	0.954074	1	H	H	H		unclassified
1522	mikrofon	mikrofon	26	2.80769	1.85514	1.42308	0.856648	1.46154	0.947872	2.73077	1.99113	1.69231	1.19228	12	2.75	1.81534	1.33333	0.778499	1.41667	0.996205	2.5	1.88294	1.41667	0.996205	14	2.85714	1.95555	1.5	0.94054	1.5	0.94054	2.92857	2.12908	1.92857	1.32806	1	H	none	undifferentiated		F
2142	schweigen	milczeć	26	2.53846	1.44861	2.38462	1.74532	3.11538	1.98649	2.69231	1.97523	1.73077	1.4299	11	2.63636	1.62928	2.09091	1.57826	3.81818	1.99089	2.81818	2.0405	1.45455	1.03573	15	2.46667	1.35576	2.6	1.88225	2.6	1.88225	2.6	1.99284	1.93333	1.66762		S	none	undifferentiated		unclassified
1528	miliz	milicja	26	2.07692	1.80938	3.92308	2.279	3.19231	2.09798	3.46154	2.02447	3.84615	2.36123	12	1.83333	1.33712	3.66667	2.10339	2.83333	2.12489	3.75	1.81534	4	2.48633	14	2.28571	2.16364	4.14286	2.47626	3.5	2.10311	3.21429	2.22498	3.71429	2.33464	1	A	none	undifferentiated		unclassified
1529	million	milion	26	5.15385	1.86959	1.26923	0.533494	1.5	1.02956	1.80769	1.29674	1.26923	1.04145	15	4.73333	1.86956	1.46667	0.63994	1.4	0.632456	2	1.30931	1.46667	1.35576	11	5.72727	1.79393	1	0	1.63636	1.43337	1.54545	1.29334	1	0	1	H	H	H		unclassified
1349	liebelei	miłostka	27	3.7037	1.6128	1.92593	1.2987	1.81481	1.17791	1.96296	1.09128	1.59259	1.39392	14	3.5	1.82925	1.92857	1.32806	1.85714	0.949262	2.14286	1.09945	1.5	1.09193	13	3.92308	1.38212	1.92308	1.32045	1.76923	1.42325	1.76923	1.09193	1.69231	1.70219	1	H	H	H		unclassified
1348	liebe	miłość	26	6.19231	1.69751	2.07692	1.76461	2.5	1.88149	2.80769	2.09798	1.26923	0.874423	11	6.90909	0.301511	2	1.78885	2.54545	1.91644	3.09091	1.97254	1	0	15	5.66667	2.09307	2.13333	1.80739	2.46667	1.9223	2.6	2.22967	1.46667	1.12546	1	H	H	H		unclassified
1670	nett	miły	26	5.38462	1.41639	1.38462	0.897861	1.5	1.27279	1.26923	0.603834	1.26923	0.724303	15	5.53333	1.50555	1.2	0.560612	1.2	0.560612	1.33333	0.723747	1.13333	0.516398	11	5.18182	1.32802	1.63636	1.20605	1.90909	1.81409	1.18182	0.40452	1.45455	0.934199		H	H	H		H
1530	mimik	mimika	26	3.15385	1.86959	2.07692	1.49461	1.76923	1.0318	1.84615	1.22286	1.69231	1.37896	14	3.07143	1.89997	2.14286	1.65748	1.92857	1.26881	1.64286	0.928783	1.57143	1.08941	12	3.25	1.91288	2	1.3484	1.58333	0.668558	2.08333	1.50504	1.83333	1.6967	1	H	none	undifferentiated		unclassified
1531	mimose	mimoza	26	1.80769	1.52366	1.76923	1.60767	1.53846	1.06699	1.42308	0.902134	1.57692	1.02657	12	2.16667	1.64225	2.33333	2.10339	1.75	1.21543	1.58333	0.996205	1.58333	0.900337	14	1.5	1.40055	1.28571	0.82542	1.35714	0.928783	1.28571	0.82542	1.57143	1.15787	1	H	none	undifferentiated		N
1515	miene	mina	26	3.42308	1.8149	2.46154	1.79401	2.69231	1.84974	2.65385	1.99885	1.92308	1.54721	13	4	1.73205	2.92308	1.84669	3.07692	1.93484	2.69231	2.13638	1.92308	1.70595	13	2.84615	1.77229	2	1.68325	2.30769	1.75046	2.61538	1.93815	1.92308	1.44115	1	H	none	undifferentiated		unclassified
1534	minigolf	minigolf	26	3.34615	2.07735	1.61538	1.0612	1.19231	0.633671	1.42308	0.757526	1.15385	0.464095	12	2.83333	1.58592	1.58333	0.900337	1.33333	0.887625	1.41667	0.792961	1.33333	0.651339	14	3.78571	2.39161	1.64286	1.21574	1.07143	0.267261	1.42857	0.755929	1	0	1	H	none	H		unclassified
1535	minimal	minimalny	27	1.85185	1.32153	1.74074	1.1633	1.92593	1.26873	1.81481	1.00142	1.51852	0.935224	14	2.14286	1.61041	2.07143	1.43925	2.35714	1.54955	2.14286	1.23146	1.5	1.09193	13	1.53846	0.877058	1.38462	0.650444	1.46154	0.660225	1.46154	0.518875	1.53846	0.77625		S	none	undifferentiated		N
1536	minimum	minimum	26	2.65385	1.67194	2.30769	1.49048	2.19231	1.44275	2.15385	1.51505	1.34615	0.891843	11	2.45455	1.4397	2.36364	1.36182	2.54545	1.69491	1.81818	1.47093	1	0	15	2.8	1.85934	2.26667	1.62422	1.93333	1.2228	2.4	1.54919	1.6	1.12122	1	H	none	undifferentiated		unclassified
1537	minirock	miniówka	27	3.81481	2.09463	1.51852	0.848998	1.37037	0.629294	1.40741	1.04731	1.92593	1.38469	14	2.92857	1.63915	1.92857	0.997249	1.64286	0.744946	1.78571	1.3688	2.5	1.40055	13	4.76923	2.16617	1.07692	0.27735	1.07692	0.27735	1	0	1.30769	1.1094	1	H	none	H		unclassified
1538	minister	minister	27	1.88889	1.33973	3	1.92154	1.96296	1.25519	1.92593	1.61545	2.74074	1.7887	14	1.78571	1.3114	3.28571	2.36736	1.78571	1.42389	2	1.92154	3.07143	2.20015	13	2	1.41421	2.69231	1.31559	2.15385	1.06819	1.84615	1.28103	2.38462	1.19293	1	A	none	undifferentiated		unclassified
1539	minus	minus	27	1.44444	1.2195	2.33333	1.73205	2.74074	1.91337	2.22222	1.82574	1.62963	1.07946	14	1.42857	0.646206	2.71429	1.72888	3.28571	1.68379	3.28571	2.01642	2.14286	1.29241	13	1.46154	1.6641	1.92308	1.70595	2.15385	2.03495	1.07692	0.27735	1.07692	0.27735	1	S	none	undifferentiated		unclassified
1540	minute	minuta	26	2.65385	1.76505	2.23077	1.70429	2.03846	1.61197	2.30769	1.64364	1.5	1.10454	11	2.63636	1.85864	2.63636	2.15744	2.09091	1.6404	2.36364	1.80404	1.27273	0.904534	15	2.66667	1.75933	1.93333	1.27988	2	1.64751	2.26667	1.57963	1.66667	1.23443	1	H	none	undifferentiated		unclassified
341	besen	miotła	26	1.76923	1.45073	1.69231	1.34964	1.38462	0.637302	1.23077	0.514408	1.53846	0.947872	12	1.25	0.621582	1.33333	0.778499	1.33333	0.492366	1.16667	0.389249	1.41667	0.900337	14	2.21429	1.80506	2	1.6641	1.42857	0.755929	1.28571	0.61125	1.64286	1.00821	1	H	none	undifferentiated		N
1028	honig	miód	26	4.80769	2.00038	1.11538	0.431455	1.26923	0.533494	1.15385	0.464095	1.07692	0.392232	11	5.27273	1.67874	1	0	1.18182	0.40452	1	0	1	0	15	4.46667	2.19957	1.2	0.560612	1.33333	0.617213	1.26667	0.593617	1.13333	0.516398	1	H	H	H		H
1544	mission	misja	26	3.96154	1.75455	1.76923	1.30561	1.53846	0.947872	2.76923	1.7276	1.30769	0.617688	14	3.28571	1.81568	1.57143	1.15787	1.35714	0.633324	2.5	1.60528	1.28571	0.61125	12	4.75	1.3568	2	1.4771	1.75	1.21543	3.08333	1.88092	1.33333	0.651339	1	H	none	H		unclassified
1494	meister	mistrz	27	5	1.94145	1.55556	1.05003	1.44444	1.01274	1.48148	0.802418	1.40741	1.00992	14	4.85714	1.9945	1.42857	0.937614	1.35714	0.928783	1.57143	0.937614	1.35714	0.928783	13	5.15385	1.95133	1.69231	1.18213	1.53846	1.1266	1.38462	0.650444	1.46154	1.1266	1	H	H	H		unclassified
1619	mystisch	mistyczny	27	3.44444	2.0064	1.44444	1.25064	1.40741	0.888355	2.03704	1.45395	1.2963	0.775332	14	3.57143	2.27746	1.21429	0.578934	1.21429	0.801784	1.85714	1.51186	1.28571	0.726273	13	3.30769	1.75046	1.69231	1.70219	1.61538	0.960769	2.23077	1.42325	1.30769	0.85485		H	none	H		unclassified
1618	mystik	mistyka	26	3.23077	1.94541	1.92308	1.59808	2.23077	1.47804	2.5	1.72627	2.11538	1.75104	11	3.54545	2.33939	1.45455	0.934199	2.72727	1.55505	2.63636	1.12006	2	1.89737	15	3	1.64751	2.26667	1.90738	1.86667	1.35576	2.4	2.09762	2.2	1.69874	1	H	none	undifferentiated		unclassified
2400	teddy	miś	26	5.19231	1.52366	1.07692	0.271746	1.57692	1.06482	1.42308	0.808608	1	0	12	5.16667	1.6967	1.08333	0.288675	1.83333	1.2673	1.41667	0.668558	1	0	14	5.21429	1.42389	1.07143	0.267261	1.35714	0.841897	1.42857	0.937614	1	0	1	H	H	H		H
1620	mythos	mit	26	2.30769	1.73826	2.03846	1.61197	2.26923	1.66271	1.88462	1.42343	1.57692	1.27037	15	2.46667	1.72654	1.73333	0.96115	1.8	1.37321	1.73333	0.96115	1.6	1.29835	11	2.09091	1.81409	2.45455	2.20743	2.90909	1.8684	2.09091	1.92117	1.54545	1.29334	1	H	none	undifferentiated		unclassified
1523	milch	mleczny	26	3.34615	1.85348	1.80769	1.62528	1.53846	1.24035	1.65385	1.19808	1.73077	1.31325	14	3	1.6641	1.57143	1.65084	1.35714	1.33631	1.57143	1.34246	1.71429	1.68379	12	3.75	2.0505	2.08333	1.62135	1.75	1.13818	1.75	1.05529	1.75	0.753778	1	H	none	H		unclassified
1080	jugend	młodzieżowy	26	3.53846	1.70249	1.84615	1.4613	1.5	0.948683	1.38462	0.852147	1.30769	0.679366	12	3.08333	1.31137	1.5	0.797724	1.41667	0.668558	1.33333	0.778499	1.25	0.621582	14	3.92857	1.94004	2.14286	1.83375	1.57143	1.15787	1.42857	0.937614	1.35714	0.744946	1	H	none	H		unclassified
955	hammer	młotek	27	2.59259	2.0987	2.22222	1.62512	1.48148	0.975483	1.92593	1.20658	1.37037	0.741524	14	2.57143	2.13809	2.64286	1.94569	1.21429	0.578934	1.85714	1.46009	1.42857	0.755929	13	2.61538	2.14237	1.76923	1.09193	1.76923	1.23517	2	0.912871	1.30769	0.751068	1	H	none	undifferentiated		unclassified
1532	minder	mniejszy	26	1.84615	1.61722	1.96154	1.66086	2.11538	1.42343	1.73077	1.21845	1.26923	0.533494	12	2.33333	2.14617	1.58333	1.50504	1.58333	0.996205	1.33333	0.887625	1.16667	0.389249	14	1.42857	0.851631	2.28571	1.77281	2.57143	1.60357	2.07143	1.38477	1.35714	0.633324		S	none	undifferentiated		unclassified
928	großmacht	mocarstwo	27	2.62963	1.54791	1.85185	1.09908	1.77778	1.08604	3.11111	1.52753	1.85185	1.19948	14	3	1.61722	2.42857	1.2225	2.07143	1.26881	3.5	1.45444	2.28571	1.38278	13	2.23077	1.42325	1.23077	0.438529	1.46154	0.77625	2.69231	1.54837	1.38462	0.767948		F	none	undifferentiated		F
1553	mode	moda	26	2.65385	2.01876	2.57692	1.8149	1.57692	1.02657	1.46154	1.02882	2.42308	1.77027	12	3.16667	1.89896	2.16667	1.2673	1.75	0.965307	1.58333	0.996205	1.75	1.21543	14	2.21429	2.08211	2.92857	2.1649	1.42857	1.08941	1.35714	1.08182	3	2	1	H	none	undifferentiated		unclassified
1565	monarch	monarcha	26	2.07692	1.59808	2.76923	2.00614	2.42308	1.87985	3.26923	2.25491	2.73077	2.2371	12	1.66667	1.07309	2.75	2.26134	2	1.70561	3.66667	2.38683	2.83333	2.36771	14	2.42857	1.91007	2.78571	1.84718	2.78571	2.00686	2.92857	2.1649	2.64286	2.20514	1	F	none	undifferentiated		unclassified
1569	monogam	monogamiczny	26	3.96154	2.06844	1.57692	1.36156	1.57692	1.20576	2	1.38564	1.30769	0.679366	15	4.13333	2.03072	1.6	1.29835	1.6	1.24212	2.13333	1.45733	1.2	0.414039	11	3.72727	2.19504	1.54545	1.50756	1.54545	1.21356	1.81818	1.32802	1.45455	0.934199		H	none	H		unclassified
1570	monolog	monolog	26	2.26923	1.84516	2.23077	1.45073	2.34615	1.62339	1.88462	1.45126	1.84615	1.59229	12	1.91667	1.37895	2.08333	1.24011	2.25	1.28806	1.58333	0.792961	1.25	0.621582	14	2.57143	2.17377	2.35714	1.64584	2.42857	1.91007	2.14286	1.83375	2.35714	1.98483	1	S	none	undifferentiated		unclassified
1571	monopol	monopolowy	26	3	2.09762	1.38462	0.752432	1.80769	1.44275	1.38462	0.752432	1.73077	1.18516	12	2.5	2.06706	1.41667	0.668558	2.16667	1.6967	1.58333	0.996205	1.66667	1.07309	14	3.42857	2.1018	1.35714	0.841897	1.5	1.16024	1.21429	0.425815	1.78571	1.3114	1	H	none	H		unclassified
1572	monoton	monotonny	26	1.26923	0.452344	3.53846	1.55514	3.73077	1.82335	2.76923	2.00614	2.53846	1.72582	14	1.14286	0.363137	3.35714	1.44686	3.21429	1.67233	2.5	2.27866	2	1.51911	12	1.41667	0.514929	3.75	1.71226	4.33333	1.87487	3.08333	1.67649	3.16667	1.80067		S	none	undifferentiated		unclassified
1573	monstrum	monstrum	27	1.51852	1.22067	2.33333	1.98068	2.40741	2.00498	4.14815	2.0885	3.37037	2.09667	14	1.07143	0.267261	3.07143	2.46403	3	2.28709	4.28571	2.12779	3.35714	2.40535	13	2	1.63299	1.53846	0.77625	1.76923	1.48064	4	2.12132	3.38462	1.80455	1	F	none	undifferentiated		unclassified
188	aufbauen	montować	26	3.19231	1.744	2.34615	1.76505	1.5	1.24097	1.84615	1.22286	2.03846	1.84349	13	3	2.08167	2.38462	1.75777	1.53846	1.1266	2.07692	1.49786	2.07692	1.75412	13	3.38462	1.38675	2.30769	1.84321	1.46154	1.39137	1.61538	0.869718	2	2		H	none	undifferentiated		unclassified
1579	moralist	moralista	26	1.80769	1.16685	3.61538	1.79057	2.11538	1.53172	2.23077	1.63236	2.57692	1.98339	14	1.42857	0.851631	3.78571	1.84718	1.57143	0.755929	2.07143	1.20667	2.35714	1.82323	12	2.25	1.3568	3.41667	1.78164	2.75	1.95982	2.41667	2.06522	2.83333	2.2088	1	A	none	undifferentiated		A
1578	moral	moralny	26	4.30769	1.95488	1.69231	1.40767	1.76923	1.1422	1.84615	1.22286	1.30769	0.617688	12	4.16667	1.99241	1.58333	1.44338	1.75	0.965307	1.75	1.21543	1.16667	0.389249	14	4.42857	1.98898	1.78571	1.42389	1.78571	1.3114	1.92857	1.26881	1.42857	0.755929	1	H	H	H		unclassified
1581	mord	mord	27	1.25926	0.984206	5.22222	2.04438	5.22222	1.94804	5.25926	2.01136	5.22222	2.22457	14	1.42857	1.34246	5.92857	1.68543	5.92857	1.54244	6	1.6641	5.64286	2.16997	13	1.07692	0.27735	4.46154	2.18386	4.46154	2.10616	4.46154	2.10616	4.76923	2.27866	1	F	none	undifferentiated		unclassified
1584	mordtat	morderstwo	54	1.22222	0.793052	4.87037	2.03782	5.38889	1.99449	5.98148	1.71002	4.96296	2.27341	28	1.03571	0.188982	5.53571	1.81521	6.39286	1.16553	6.71429	0.599824	5.57143	2.04448	26	1.42308	1.10175	4.15385	2.05314	4.30769	2.14978	5.19231	2.13578	4.30769	2.36253	1	F	none	undifferentiated		unclassified
1582	morden	mordować	26	1.23077	0.992278	5.03846	2.16298	4.80769	2.13578	5.53846	1.67883	5.23077	2.21464	13	1	0	5.46154	2.29548	5.30769	1.97419	6.30769	1.03155	5.69231	2.05688	13	1.46154	1.39137	4.61538	2.02231	4.30769	2.25036	4.76923	1.87767	4.76923	2.35067		F	none	undifferentiated		unclassified
1487	meer	morze	26	5.34615	1.29437	1.61538	1.65111	2.26923	1.61388	2.88462	2.23297	1.26923	0.666795	12	5.5	1.31426	1.75	1.76455	1.91667	1.44338	3.08333	2.4293	1.5	0.904534	14	5.21429	1.3114	1.5	1.60528	2.57143	1.74154	2.71429	2.12779	1.07143	0.267261	1	H	H	H		unclassified
435	brücke	most	26	2.92308	1.91673	1.23077	0.862911	1.26923	0.827415	2.38462	1.49872	1.30769	0.970329	12	2.5	1.31426	1.16667	0.57735	1.25	0.452267	2.33333	1.49747	1.33333	0.887625	14	3.28571	2.30146	1.28571	1.06904	1.28571	1.06904	2.42857	1.55486	1.28571	1.06904	1	H	none	blended	HF	unclassified
881	gesindel	motłoch	26	1.19231	0.491466	4.11538	1.79615	1.96154	1.66086	3.07692	1.95802	3.76923	1.77331	12	1.25	0.621582	3.58333	1.72986	1.75	1.60255	2.83333	1.99241	3.41667	1.67649	14	1.14286	0.363137	4.57143	1.78516	2.14286	1.74784	3.28571	1.9779	4.07143	1.85904	1	A	none	undifferentiated		unclassified
1591	motorrad	motocykl	26	3.61538	2.09908	1.80769	1.3862	1.61538	1.41639	3.23077	1.92474	1.69231	1.54322	14	2.28571	1.26665	2.21429	1.76193	1.78571	1.84718	3.78571	2.19014	2.07143	2.01778	12	5.16667	1.80067	1.33333	0.492366	1.41667	0.668558	2.58333	1.37895	1.25	0.452267	1	H	none	blended	HF	unclassified
1577	moped	motorower	27	3.33333	1.94145	1.74074	1.28879	1.37037	0.741524	1.96296	1.37229	1.55556	1.31071	14	3.07143	1.77436	1.57143	1.01635	1.42857	0.937614	2	1.41421	1.5	1.09193	13	3.61538	2.14237	1.92308	1.5525	1.30769	0.480384	1.92308	1.38212	1.61538	1.55662	1	H	none	H		unclassified
1593	motto	motto	26	3.73077	1.73338	1.61538	1.20256	1.57692	1.27037	1.73077	1.66271	1.57692	1.33186	13	3.46154	2.06621	1.61538	1.38675	1.76923	1.69085	2	2.04124	1.53846	1.39137	13	4	1.35401	1.61538	1.04391	1.38462	0.650444	1.46154	1.19829	1.61538	1.3253	1	H	H	H		unclassified
1589	motiv	motywować	26	4.96154	1.45549	1.92308	1.57285	1.61538	1.23538	1.92308	1.26248	1.23077	0.710363	13	5.30769	1.25064	1.92308	1.65638	1.53846	1.19829	2.07692	1.49786	1.23077	0.83205	13	4.61538	1.60927	1.92308	1.5525	1.69231	1.31559	1.76923	1.01274	1.23077	0.599145	1	H	H	H		unclassified
1924	rede	mowa	27	4.2963	2.01561	2.25926	1.50876	2	1.4676	2.14815	1.51159	1.62963	1.27545	14	4.64286	1.64584	2.35714	1.33631	2.28571	1.38278	2.64286	1.44686	1.71429	1.20439	13	3.92308	2.36155	2.15385	1.72463	1.69231	1.54837	1.61538	1.44559	1.53846	1.39137	1	H	H	H		unclassified
1587	mörser	moździerz	26	1.53846	1.1395	1.92308	1.44009	2.19231	1.83345	2.61538	1.72225	2.30769	1.93431	12	1.33333	0.887625	1.66667	1.37069	1.83333	1.52753	2.41667	1.83196	2.33333	2.18812	14	1.71429	1.32599	2.14286	1.51186	2.5	2.06621	2.78571	1.67233	2.28571	1.77281	1	F	none	undifferentiated		unclassified
1206	können	móc	26	4.92308	1.87453	1.46154	0.947872	1.46154	1.02882	2	1.6	1.11538	0.431455	11	5.63636	1.28629	1.18182	0.40452	1.27273	0.64667	2.27273	1.84883	1	0	15	4.4	2.09762	1.66667	1.17514	1.6	1.24212	1.8	1.42428	1.2	0.560612		H	H	H		unclassified
1592	motte	mól	26	1.15385	0.464095	3.57692	2.17574	2.38462	1.91994	2.46154	1.81617	3.76923	2.32048	11	1.09091	0.301511	4.63636	2.06265	3	2.09762	2.63636	1.80404	4.54545	2.42337	15	1.2	0.560612	2.8	1.97122	1.93333	1.70992	2.33333	1.87718	3.2	2.14476	1	D	none	undifferentiated		unclassified
1925	redner	mówca	27	2.66667	1.51911	1.85185	1.09908	1.59259	1.04731	2.40741	2.02407	1.55556	1.25064	14	2.64286	1.39268	1.64286	0.928783	1.5	1.09193	2.57143	2.27746	1.21429	0.578934	13	2.69231	1.70219	2.07692	1.25576	1.69231	1.03155	2.23077	1.7867	1.92308	1.65638	1	H	none	undifferentiated		unclassified
2265	sprechen	mówić	27	3.74074	1.87273	1.88889	1.2195	1.7037	1.06752	2.25926	1.50876	1.37037	0.83887	14	3.92857	1.68543	2.07143	1.20667	1.92857	1.20667	2.14286	1.40642	1.42857	1.08941	13	3.53846	2.10616	1.69231	1.25064	1.46154	0.877058	2.38462	1.66024	1.30769	0.480384		H	none	H		unclassified
845	gehirn	mózg	27	4.2963	2.18059	1.44444	1.1209	1.2963	0.953327	2.2963	1.58878	1.51852	1.22067	14	4.14286	2.24832	1.57143	1.15787	1.28571	0.82542	1.92857	1.20667	1.28571	1.06904	13	4.46154	2.18386	1.30769	1.1094	1.30769	1.1094	2.69231	1.88788	1.76923	1.36344	1	H	none	H		unclassified
742	fliege	mucha	26	1.34615	0.745241	3.38462	2.22849	1.53846	0.989172	1.73077	1.07917	3.34615	2.38231	13	1.15385	0.5547	4	2.27303	1.53846	0.967418	1.92308	1.18754	3.92308	2.56455	13	1.53846	0.877058	2.76923	2.08782	1.53846	1.05003	1.53846	0.967418	2.76923	2.12736	1	A	none	blended	AD	unclassified
1597	mumie	mumia	26	1.84615	1.31734	1.38462	1.13409	1.5	1.2083	2.65385	1.46812	2.26923	1.77894	12	1.5	1.16775	1.16667	0.57735	1.5	1.16775	2.75	1.3568	2.25	1.65831	14	2.14286	1.40642	1.57143	1.45255	1.5	1.28602	2.57143	1.60357	2.28571	1.93862	1	F	none	undifferentiated		F
1476	mauer	mur	27	1.66667	0.919866	2.59259	1.64689	2.18519	1.44214	2.59259	1.90665	1.74074	1.19591	14	1.64286	1.00821	2.57143	1.91007	2	1.4676	2.64286	1.90575	1.71429	1.06904	13	1.69231	0.85485	2.61538	1.38675	2.38462	1.44559	2.53846	1.98391	1.76923	1.36344	1	none	none	undifferentiated		unclassified
1658	neger	murzyn	26	1.69231	1.40767	1.57692	0.986836	1.30769	0.884047	1.46154	0.989172	1.61538	1.26734	12	1.75	1.3568	1.41667	0.996205	1.16667	0.57735	1.25	0.621582	1.16667	0.57735	14	1.64286	1.49908	1.71429	0.99449	1.42857	1.08941	1.64286	1.21574	2	1.56893	1	H	none	undifferentiated		N
1659	negerin	murzynka	27	3.55556	1.9282	1.66667	1.54422	1.48148	1.22067	1.62963	1.3344	1.7037	1.4888	14	3.28571	2.01642	1.71429	1.48989	1.35714	0.633324	1.28571	0.61125	1.78571	1.3688	13	3.84615	1.86396	1.61538	1.66024	1.61538	1.66024	2	1.77951	1.61538	1.66024	1	H	none	H		unclassified
1605	musical	musical	26	3.76923	1.81786	1.76923	1.65669	1.5	1.27279	1.38462	1.29852	1.53846	1.27219	13	4.46154	1.76141	1.61538	1.38675	1.30769	0.630425	1.07692	0.27735	1.23077	0.438529	13	3.07692	1.65638	1.92308	1.93484	1.69231	1.70219	1.69231	1.79743	1.84615	1.72463	1	H	H	H		unclassified
2225	sollen	musieć	26	1.26923	0.724303	3.80769	1.76679	2.53846	1.5292	2.30769	1.51708	2.61538	1.85638	12	1.25	0.621582	3.75	1.48477	2.33333	1.07309	2.41667	1.50504	2	1.53741	14	1.28571	0.82542	3.85714	2.0327	2.71429	1.85757	2.21429	1.57766	3.14286	1.9945		A	none	undifferentiated		A
1604	muschel	muszla	26	3.5	2.26716	1.26923	0.724303	1.76923	1.1767	1.46154	0.706018	1.26923	0.452344	12	3.41667	2.19331	1.08333	0.288675	1.58333	1.1645	1.41667	0.792961	1.33333	0.492366	14	3.57143	2.40878	1.42857	0.937614	1.92857	1.20667	1.5	0.650444	1.21429	0.425815	1	H	none	H		unclassified
1613	mutation	mutacja	26	1.88462	1.77374	2.65385	2.24397	2.19231	2.03998	2.84615	2.2573	2.84615	2.20349	12	1.25	0.621582	2.83333	2.36771	2.25	2.00567	2.83333	2.58785	3.58333	2.53909	14	2.42857	2.24343	2.5	2.21012	2.14286	2.14322	2.85714	2.0327	2.21429	1.71772	1	none	none	undifferentiated		unclassified
1608	musiker	muzyk	26	4.76923	1.88271	1.69231	1.31967	2.07692	1.29377	1.11538	0.325813	1.34615	1.09334	11	4.90909	1.92117	1.45455	1.03573	2.36364	1.28629	1.09091	0.301511	1	0	15	4.66667	1.91485	1.86667	1.50555	1.86667	1.30201	1.13333	0.351866	1.6	1.40408	1	H	H	H		unclassified
1606	musik	muzyka	26	6.07692	1.01678	1.65385	1.29437	2.38462	1.85638	1.38462	1.16883	1.23077	0.992278	11	6	0.774597	2.09091	1.81409	3.27273	2.10195	1.63636	1.5667	1.45455	1.50756	15	6.13333	1.18723	1.33333	0.617213	1.73333	1.38701	1.2	0.774597	1.06667	0.258199	1	H	H	H		H
1283	lauge	mydliny	26	2.88462	2.12277	1.34615	0.689481	1.61538	0.941357	1.38462	0.697247	2.26923	1.71015	13	3.23077	2.16617	1.23077	0.599145	1.61538	0.869718	1.38462	0.767948	2.07692	1.801	13	2.53846	2.10616	1.46154	0.77625	1.61538	1.04391	1.38462	0.650444	2.46154	1.6641	1	H	none	undifferentiated		unclassified
2162	seife	mydło	26	3.46154	2.00461	1.46154	0.904689	1.53846	0.989172	1.34615	0.93562	1.73077	1.15092	15	3.26667	1.90738	1.33333	0.723747	1.4	0.736788	1.46667	1.12546	1.46667	0.743223	11	3.72727	2.19504	1.63636	1.12006	1.72727	1.27208	1.18182	0.603023	2.09091	1.51357	1	H	none	H		unclassified
1481	mausgrau	mysi	27	1.88889	1.73944	2	1.59326	1.92593	1.56711	2.07407	1.63909	2.88889	2.29269	14	2.14286	2.0702	1.92857	1.26881	2.21429	1.57766	2.5	1.9115	2.92857	2.49505	13	1.61538	1.3253	2.07692	1.93484	1.61538	1.55662	1.61538	1.19293	2.84615	2.1543		D	none	undifferentiated		unclassified
1480	maus	mysz	27	2.40741	1.44806	1.85185	1.43322	1.77778	1.36814	2.85185	2.17863	3.37037	2.07824	14	2.42857	1.55486	1.71429	1.13873	1.71429	1.48989	3.78571	2.48623	3.71429	2.36736	13	2.38462	1.38675	2	1.73205	1.84615	1.28103	1.84615	1.21423	3	1.73205	1	D	none	undifferentiated		unclassified
827	gedanke	myśl	26	4.03846	1.75455	1.69231	1.43581	2.15385	1.86959	2.07692	1.62291	1.42308	1.27037	12	3.5	1.3817	1.25	0.621582	1.75	1.3568	1.83333	1.40346	1.25	0.621582	14	4.5	1.95133	2.07143	1.8172	2.5	2.21012	2.28571	1.81568	1.57143	1.65084	1	H	H	H		unclassified
1491	meinen	myśleć	27	4.74074	1.70051	1.96296	1.12597	1.74074	1.09519	1.66667	1.1094	1.55556	1.05003	14	5.21429	1.67233	2.07143	1.07161	1.71429	0.99449	1.78571	1.42389	1.57143	0.937614	13	4.23077	1.64083	1.84615	1.21423	1.76923	1.23517	1.53846	0.660225	1.53846	1.19829		H	H	H		unclassified
488	denker	myśliciel	26	3.23077	1.86135	1.53846	0.989172	2.61538	1.96116	2.03846	1.73161	1.53846	1.27219	12	2.91667	1.78164	1.58333	1.1645	2.08333	1.67649	1.91667	1.50504	1.91667	1.72986	14	3.5	1.95133	1.5	0.85485	3.07143	2.12908	2.14286	1.95555	1.21429	0.578934	1	H	none	undifferentiated		unclassified
653	erwerb	nabytek	27	4.55556	1.64862	1.66667	1.24035	1.66667	1.33012	1.55556	0.974022	1.44444	1.08604	14	5.14286	1.51186	1.42857	0.937614	1.28571	0.61125	1.35714	0.744946	1.28571	0.82542	13	3.92308	1.60528	1.92308	1.49786	2.07692	1.75412	1.76923	1.16575	1.61538	1.3253	1	H	H	H		unclassified
654	erwerben	nabywać	26	4.5	1.67929	1.73077	1.18516	1.26923	0.827415	1.80769	1.26552	1.30769	0.735893	13	5	1.52753	1.92308	1.25576	1.38462	1.1209	1.92308	1.60528	1.30769	0.630425	13	4	1.73205	1.53846	1.1266	1.15385	0.375534	1.69231	0.85485	1.30769	0.85485		H	H	H		unclassified
137	anpumpen	naciągać	27	1.85185	1.65724	3.96296	1.99	2.74074	1.89316	3.03704	2.02829	3.37037	2.25573	14	2	1.6641	3.71429	1.93862	2.85714	1.74784	3.14286	1.9945	3.5	1.82925	13	1.69231	1.70219	4.23077	2.08782	2.61538	2.10311	2.92308	2.13937	3.23077	2.71274		A	none	undifferentiated		unclassified
1135	kerbe	nacinać	26	1.42308	0.902134	2.61538	1.72225	2.61538	1.94066	3.73077	1.90909	2.76923	1.81786	13	1.61538	1.1209	2.30769	1.6525	3.30769	2.09701	4.23077	1.7867	3.30769	1.97419	13	1.23077	0.599145	2.92308	1.801	1.92308	1.5525	3.23077	1.96443	2.23077	1.5359	1	F	none	undifferentiated		unclassified
530	drücken	naciskać	26	1.5	0.905539	3.84615	1.7133	2.69231	1.93431	3.26923	2.05052	2.73077	2.1828	11	1.54545	1.03573	4.27273	1.27208	2.90909	2.07145	3.81818	2.13627	2.63636	2.06265	15	1.46667	0.833809	3.53333	1.95911	2.53333	1.88478	2.86667	1.95911	2.8	2.33605		A	none	undifferentiated		unclassified
37	absender	nadawca	26	2.30769	1.69161	1.46154	0.904689	1.53846	1.17408	1.69231	1.19228	1.26923	0.77757	15	2.2	1.78085	1.33333	0.723747	1.46667	0.99043	1.4	0.632456	1.26667	0.703732	11	2.45455	1.63485	1.63636	1.12006	1.63636	1.43337	2.09091	1.6404	1.27273	0.904534	1	H	none	undifferentiated		N
2481	treten	nadepnąć	26	1.38462	0.897861	3.23077	1.88271	2.61538	1.57675	2.34615	1.5477	2.30769	1.66779	14	1.07143	0.267261	3.28571	1.68379	2.5	1.40055	1.92857	1.68543	2.07143	1.59153	12	1.75	1.21543	3.16667	2.16725	2.75	1.81534	2.83333	1.2673	2.58333	1.78164		A	none	undifferentiated		A
249	baltikum	nadmorski	27	4.85185	2.07	1.37037	1.07946	1.7037	1.1373	1.55556	1.2195	1.33333	0.919866	14	5.35714	1.86495	1.35714	1.08182	1.64286	1.21574	1.78571	1.47693	1.5	1.16024	13	4.30769	2.21302	1.38462	1.1209	1.76923	1.09193	1.30769	0.85485	1.15385	0.5547	1	H	H	H		unclassified
1024	hoffnung	nadzieja	26	4.76923	1.77331	1.69231	1.25759	2.65385	1.83177	2.57692	1.8149	1.03846	0.196116	12	4.66667	1.37069	1.91667	1.37895	2.5	1.73205	2.91667	2.02073	1.08333	0.288675	14	4.85714	2.10703	1.5	1.16024	2.78571	1.96815	2.28571	1.63747	1	0	1	H	H	H		unclassified
201	aufseher	nadzorca	26	1.57692	1.27037	2.19231	1.91873	1.76923	1.45073	2.46154	1.63048	2.15385	1.75937	12	1.75	1.48477	1.66667	1.23091	1.41667	0.996205	2.5	1.446	1.75	1.13818	14	1.42857	1.08941	2.64286	2.30742	2.07143	1.73046	2.42857	1.82775	2.5	2.13937	1	F	none	undifferentiated		unclassified
2367	tadel	nagana	26	1.26923	0.603834	3.42308	1.65343	3.73077	1.71015	3.76923	1.81786	1.76923	1.1422	14	1.07143	0.267261	3.42857	1.65084	3.57143	1.74154	3.5	2.02864	1.35714	0.633324	12	1.5	0.797724	3.41667	1.72986	3.91667	1.72986	4.08333	1.56428	2.25	1.42223	1	F	none	blended	FSA	unclassified
1631	nackt	nagi	26	3.15385	2.05314	1.96154	1.56156	2.19231	1.69751	2.65385	1.8098	2.11538	1.36607	15	2.8	1.56753	2.2	1.37321	2.2	1.69874	3.13333	1.68466	2	1.36277	11	3.63636	2.57964	1.63636	1.80404	2.18182	1.77866	2	1.84391	2.27273	1.42063		H	none	undifferentiated		unclassified
324	belohnen	nagradzać	26	5.38462	1.47179	1.30769	1.04954	1.23077	0.651625	1.23077	0.815239	1	0	12	5.58333	1.31137	1.58333	1.50504	1.33333	0.887625	1	0	1	0	14	5.21429	1.62569	1.07143	0.267261	1.14286	0.363137	1.42857	1.08941	1	0		H	H	H		H
197	aufnahme	nagranie	27	3.51852	1.94877	1.62963	1.11452	1.40741	0.747265	2.22222	1.36814	1.62963	1.21365	14	3.5	1.87083	1.71429	0.82542	1.78571	0.892582	2.42857	1.15787	1.64286	1.15073	13	3.53846	2.10616	1.53846	1.39137	1	0	2	1.58114	1.61538	1.3253	1	H	none	H		unclassified
198	aufnehmen	nagrywać	26	3.03846	1.92833	2.65385	1.67194	1.80769	1.41476	3.42308	2.02333	2.03846	1.42775	15	3.33333	2.02367	2.8	1.78085	2.26667	1.70992	3.66667	2.12692	2	1.41421	11	2.63636	1.80404	2.45455	1.57249	1.18182	0.40452	3.09091	1.92117	2.09091	1.51357		F	none	undifferentiated		unclassified
559	einfalt	naiwność	26	1.5	0.860233	4	2.24499	3.84615	2.23951	2.80769	2.17291	2.65385	2.13433	11	1.54545	0.8202	3.81818	2.35874	4.27273	2.05382	3.09091	2.21154	2.18182	1.83402	15	1.46667	0.915475	4.13333	2.2318	3.53333	2.38647	2.6	2.1974	3	2.32993	1	A	none	undifferentiated		unclassified
1637	naiv	naiwny	26	1.61538	1.29852	3.42308	1.79272	4.11538	1.86176	3.5	1.86011	2.76923	2.00614	15	1.4	0.736788	4.06667	1.43759	4.6	1.88225	3.73333	1.86956	2.86667	2.06559	11	1.90909	1.81409	2.54545	1.91644	3.45455	1.69491	3.18182	1.88776	2.63636	2.01359		S	none	undifferentiated		unclassified
1519	mieter	najemca	26	1.96154	1.21592	2.34615	1.67194	2.19231	1.60048	2.38462	1.65111	2.07692	1.62291	11	2.09091	1.51357	2.45455	1.96792	2.27273	1.73729	2.90909	2.0226	1.90909	1.81409	15	1.86667	0.99043	2.26667	1.48645	2.13333	1.55226	2	1.25357	2.2	1.52128	1	F	none	undifferentiated		unclassified
522	drängen	nalegać	26	1.26923	0.724303	4.07692	1.99846	2.30769	1.61912	2.69231	1.84974	2.57692	2.06249	11	1.36364	0.924416	4.81818	1.47093	2.63636	1.68954	3.18182	2.18258	2.72727	2.05382	15	1.2	0.560612	3.53333	2.19957	2.06667	1.57963	2.33333	1.54303	2.46667	2.13363		A	none	A		A
846	gehören	należeć	26	3.53846	1.77157	1.80769	1.05903	1.96154	1.18257	2.53846	1.5292	1.61538	1.38786	15	3.4	1.76473	2.13333	1.0601	2.13333	1.24595	2.8	1.74028	1.8	1.65616	11	3.72727	1.84883	1.36364	0.924416	1.72727	1.10371	2.18182	1.16775	1.36364	0.924416		H	none	undifferentiated		unclassified
2357	sucht	nałóg	27	1.48148	1.18874	4.11111	2.0064	3.77778	1.98714	3.40741	2.04299	3.81481	2.40252	14	1.42857	1.34246	3.78571	1.88837	3.64286	1.86495	3.14286	2.21384	3.5	2.24465	13	1.53846	1.05003	4.46154	2.14536	3.92308	2.17798	3.69231	1.88788	4.15385	2.60916	1	A	none	undifferentiated		unclassified
108	anfall	napad	26	1.11538	0.588348	4	1.83303	2.96154	2.00959	4.92308	1.97834	3.07692	2.22572	12	1.25	0.866025	3.75	1.42223	2.33333	1.61433	5	1.59545	2.33333	1.37069	14	1	0	4.21429	2.15473	3.5	2.21012	4.85714	2.31574	3.71429	2.64367	1	F	none	undifferentiated		unclassified
109	anfallen	napadać	26	1.03846	0.196116	4.26923	2.05052	3.5	1.81659	4.73077	1.80128	3.80769	2.26308	13	1	0	4.61538	1.93815	4	1.82574	5.69231	1.37747	4	2.48328	13	1.07692	0.27735	3.92308	2.17798	3	1.73205	3.76923	1.69085	3.61538	2.10311		F	none	undifferentiated		unclassified
2517	überfall	napastować	27	1.33333	0.784465	4.22222	1.94804	3.92593	2.28584	4.88889	2.18972	4.92593	1.99857	14	1.28571	0.61125	5.21429	1.62569	5.14286	2.10703	6	1.7097	5.92857	1.63915	13	1.38462	0.960769	3.15385	1.72463	2.61538	1.7097	3.69231	2.05688	3.84615	1.81871	1	D	none	undifferentiated		unclassified
801	füllen	napełniać	27	3.44444	1.69464	1.33333	0.679366	1.37037	0.741524	1.48148	0.848998	1.37037	0.83887	14	3.92857	1.59153	1.5	0.759555	1.42857	0.646206	1.57143	0.937614	1.42857	0.851631	13	2.92308	1.70595	1.15385	0.5547	1.30769	0.85485	1.38462	0.767948	1.30769	0.85485		H	H	H		unclassified
191	auffordern	napierać	26	1.76923	1.39449	3.19231	1.52366	2.5	1.60624	3.46154	1.90223	2.46154	1.88108	13	1.61538	1.66024	3.46154	1.76141	3	1.87083	4.46154	1.71345	2.84615	2.1543	13	1.92308	1.11516	2.92308	1.25576	2	1.1547	2.46154	1.56074	2.07692	1.5525		F	none	undifferentiated		unclassified
2241	spannung	napięcie	27	1.77778	1.28103	2.81481	1.66496	2.03704	1.19233	3.59259	1.62337	1.74074	1.43024	14	1.64286	1.49908	2.71429	2.05421	1.64286	0.841897	3.92857	1.63915	1.5	0.85485	13	1.92308	1.03775	2.92308	1.18754	2.46154	1.39137	3.23077	1.58923	2	1.87083	1	F	none	undifferentiated		F
294	begegnen	napotykać	26	3.38462	1.57675	1.65385	1.09334	1.57692	0.902134	2.15385	0.967153	1.30769	0.679366	14	3.21429	1.71772	1.5	0.85485	1.42857	0.755929	1.92857	0.997249	1.28571	0.82542	12	3.58333	1.44338	1.83333	1.33712	1.75	1.05529	2.41667	0.900337	1.33333	0.492366		H	none	H		unclassified
226	aussetzen	narażać	27	1.40741	0.797074	3.92593	2.14702	3.25926	2.14104	4.48148	2.10074	2.48148	2.04508	14	1.28571	0.82542	4.14286	2.14322	3.85714	2.17882	4.71429	2.1989	2.35714	1.82323	13	1.53846	0.77625	3.69231	2.21302	2.61538	1.98068	4.23077	2.04751	2.61538	2.32875		F	none	undifferentiated		unclassified
526	droge	narkotyk	27	1.96296	1.62863	3.44444	2.04438	3.51852	1.86816	4.59259	2.0803	4.74074	1.91337	14	2.28571	1.68379	3.92857	1.8172	4.28571	1.5898	5.57143	1.60357	4.71429	1.93862	13	1.61538	1.55662	2.92308	2.21591	2.69231	1.84321	3.53846	2.06621	4.76923	1.96443	1	D	none	undifferentiated		unclassified
1643	narkose	narkoza	27	2.14815	1.81243	1.77778	1.5525	2.7037	2.0346	5.03704	1.55617	1.77778	1.28103	14	1.57143	1.01635	2.21429	2.00686	3	2.0755	5	1.61722	2.07143	1.63915	13	2.76923	2.27866	1.30769	0.630425	2.38462	2.02231	5.07692	1.5525	1.46154	0.660225	1	F	F	F		F
1647	national	narodowy	26	3.42308	1.98339	1.96154	1.42775	2.15385	1.4613	1.5	1.17473	1.76923	1.45073	12	2.91667	1.72986	1.66667	1.43548	1.66667	1.23091	1.5	1.24316	1.5	1.24316	14	3.85714	2.14322	2.21429	1.42389	2.57143	1.55486	1.5	1.16024	2	1.61722		H	none	H		unclassified
825	geburt	narodziny	26	5.69231	1.59422	1.19231	0.980581	1.53846	1.50282	3.03846	1.58697	1.69231	1.59422	13	6.07692	1.25576	1	0	1.69231	1.6525	3.30769	1.75046	2	1.77951	13	5.30769	1.84321	1.38462	1.38675	1.38462	1.38675	2.76923	1.42325	1.38462	1.38675	1	H	H	H		unclassified
2680	volk	naród	26	3.84615	1.7133	2.07692	1.38342	2.34615	1.49512	1.76923	1.06987	1.42308	1.20576	14	3.64286	1.64584	2.28571	1.54066	2	1.56893	1.78571	1.25137	1.64286	1.59842	12	4.08333	1.83196	1.83333	1.19342	2.75	1.3568	1.75	0.866025	1.16667	0.389249	1	H	none	H		unclassified
575	eintritt	nastawać	26	1.5	0.989949	2.57692	1.60432	2.11538	1.3062	3.38462	1.89899	1.88462	1.39505	13	1.53846	1.19829	3.07692	1.801	2.30769	1.37747	3.76923	2.08782	2.38462	1.80455	13	1.46154	0.77625	2.07692	1.25576	1.92308	1.25576	3	1.68325	1.38462	0.50637	1	F	none	undifferentiated		F
1623	nachfolger	następca	27	2.77778	1.45002	1.88889	1.28103	2.33333	1.59326	2.14815	1.32153	1.59259	1.18514	14	3.42857	1.28388	1.92857	1.26881	2.85714	1.87523	2.57143	1.55486	1.78571	1.3688	13	2.07692	1.32045	1.84615	1.3445	1.76923	1.01274	1.69231	0.85485	1.38462	0.960769		H	none	undifferentiated		unclassified
2318	stimmung	nastrojowy	27	4.37037	1.86358	1.40741	0.888355	2.18519	1.64169	1.7037	1.1373	1.25926	0.594371	14	4.64286	2.09788	1.64286	1.15073	2.57143	1.91007	1.92857	1.26881	1.28571	0.61125	13	4.07692	1.60528	1.15385	0.375534	1.76923	1.23517	1.46154	0.967418	1.23077	0.599145	1	H	H	H		unclassified
1284	laune	nastrój	26	4.30769	1.49048	2.57692	1.77027	3.26923	1.77894	2.46154	1.83806	1.92308	1.64738	13	4.53846	1.56074	2.92308	1.801	3.76923	1.73944	2.92308	1.97744	2.61538	2.06311	13	4.07692	1.44115	2.23077	1.73944	2.76923	1.73944	2	1.63299	1.23077	0.599145	1	H	none	undifferentiated		unclassified
1649	natur	naturalny	27	4.66667	1.54422	1.33333	0.919866	1.40741	0.930643	1.48148	0.975483	1.33333	0.877058	14	5.21429	1.42389	1.21429	0.578934	1.35714	0.633324	1.42857	0.755929	1.21429	0.425815	13	4.07692	1.49786	1.46154	1.19829	1.46154	1.19829	1.53846	1.19829	1.46154	1.19829	1	H	H	H		unclassified
1294	lehre	nauczka	26	1.73077	1.51149	3.96154	2.28877	3.23077	2.47075	3.19231	2.09798	2.5	2.14009	11	1.09091	0.301511	4.54545	2.46429	4.54545	2.58316	3.54545	2.50454	2.27273	1.79393	15	2.2	1.85934	3.53333	2.13363	2.26667	1.94447	2.93333	1.79151	2.66667	2.4103	1	A	none	undifferentiated		unclassified
1295	lehrer	nauczyciel	27	2.66667	1.20894	2.25926	1.70051	1.59259	1.21716	2.22222	1.36814	1.7037	1.32476	14	3.28571	0.99449	2.5	1.6525	1.64286	1.08182	2.35714	1.39268	2.07143	1.63915	13	2	1.08012	2	1.77951	1.53846	1.39137	2.07692	1.38212	1.30769	0.751068	1	H	none	undifferentiated		unclassified
1296	lehrerin	nauczycielka	27	3.03704	1.62863	2.44444	1.64862	2.11111	1.73944	2.55556	1.9282	1.74074	1.40309	14	3.21429	1.47693	2.85714	1.51186	2.21429	1.67233	2.71429	1.9779	2.35714	1.7368	13	2.84615	1.81871	2	1.73205	2	1.87083	2.38462	1.93815	1.07692	0.27735	1	H	none	undifferentiated		unclassified
101	anbahnen	nawiązywać	26	3.26923	1.6866	1.26923	0.666795	1.34615	0.689481	1.88462	1.3062	1.19231	0.401918	12	2.91667	1.44338	1.16667	0.389249	1.33333	0.887625	1.75	1.21543	1	0	14	3.57143	1.86936	1.35714	0.841897	1.35714	0.497245	2	1.41421	1.35714	0.497245		H	none	H		unclassified
1650	nazi	nazista	52	1.23077	0.962338	5.03846	2.05762	3.90385	2.25144	4.55769	2.164	5.19231	2.07731	24	1.125	0.612372	5.04167	2.0319	3.875	2.11233	4.875	2.09165	5.41667	1.83958	28	1.32143	1.18801	5.03571	2.11664	3.92857	2.4026	4.28571	2.22539	5	2.2771	1	D	none	undifferentiated		unclassified
1638	name	nazwisko	26	2.23077	1.70429	1.46154	0.811456	1.42308	0.902134	1.69231	1.12318	1.46154	1.10384	15	1.53333	1.12546	1.4	0.632456	1.4	0.632456	1.53333	0.63994	1.33333	0.617213	11	3.18182	1.94001	1.54545	1.03573	1.45455	1.21356	1.90909	1.57826	1.63636	1.5667	1	H	none	undifferentiated		N
1669	nennen	nazywać	27	2.96296	2.06587	1.55556	1.08604	1.44444	1.08604	1.55556	1.1209	1.44444	1.1547	14	3.21429	2.22498	1.5	0.85485	1.28571	0.468807	1.71429	1.26665	1.5	1.3445	13	2.69231	1.93152	1.61538	1.3253	1.61538	1.50214	1.38462	0.960769	1.38462	0.960769		H	none	H		unclassified
1656	negation	negacja	26	1.19231	0.491466	3.30769	1.71509	2.61538	1.49872	2.30769	1.31967	1.88462	1.10732	12	1.16667	0.57735	3.83333	1.94625	2.75	1.54479	2.08333	1.37895	1.75	0.965307	14	1.21429	0.425815	2.85714	1.40642	2.5	1.5064	2.5	1.28602	2	1.24035	1	A	none	undifferentiated		A
1657	negativ	negatywny	26	1.30769	0.928191	4.15385	1.86959	4.26923	1.90909	3.65385	1.99885	3.30769	1.97523	15	1.13333	0.516398	4.26667	2.05171	4.86667	1.72654	4.06667	1.94447	2.8	1.97122	11	1.54545	1.29334	4	1.67332	3.45455	1.91644	3.09091	2.0226	4	1.84391		S	none	undifferentiated		unclassified
351	bestreiten	negować	26	1.61538	0.982931	2.80769	1.83345	2.23077	1.7276	2.23077	1.70429	1.80769	1.26552	11	1.45455	0.8202	3.72727	2.10195	3.27273	2.05382	3	2.09762	1.90909	1.30035	15	1.73333	1.09978	2.13333	1.30201	1.46667	0.915475	1.66667	1.1127	1.73333	1.27988		A	none	undifferentiated		unclassified
1627	nachruf	nekrolog	27	1.11111	0.320256	2.77778	2.13638	5.14815	1.9156	4.22222	2.3094	2.51852	1.86816	14	1.07143	0.267261	3.42857	2.37663	5.21429	2.22498	4.57143	2.59331	2.71429	2.01642	13	1.15385	0.375534	2.07692	1.65638	5.07692	1.60528	3.84615	1.99358	2.30769	1.75046	1	S	none	undifferentiated		unclassified
1679	niere	nerka	26	2.07692	1.54721	1.53846	1.1395	2.15385	1.86959	2.65385	1.76505	2.26923	1.5889	14	1.71429	1.13873	1.57143	1.39859	2.57143	2.1018	3.07143	1.94004	2.57143	1.86936	12	2.5	1.88294	1.5	0.797724	1.66667	1.49747	2.16667	1.4668	1.91667	1.1645	1	F	none	undifferentiated		unclassified
1673	neurose	nerwica	27	1.33333	1.03775	4.11111	1.78311	4.11111	1.94804	4.25926	1.97275	2.74074	2.15893	14	1.57143	1.39859	4.07143	1.89997	4.57143	2.13809	4.92857	1.73046	2.5	2.10311	13	1.07692	0.27735	4.15385	1.72463	3.61538	1.66024	3.53846	2.02548	3	2.27303	1	F	none	blended	FAS	unclassified
582	elend	nędzny	27	1.51852	1.28214	2.77778	1.84669	4.03704	2.10277	3.25926	2.01136	3.48148	1.92894	14	1.42857	1.15787	2.92857	2.05555	5.28571	1.68379	4.28571	1.81568	4.07143	2.01778	13	1.61538	1.44559	2.61538	1.66024	2.69231	1.6525	2.15385	1.62512	2.84615	1.67562		S	none	undifferentiated		unclassified
673	faden	nić	26	2.69231	1.78369	1.5	1.02956	1.76923	1.68066	1.53846	1.39229	1.65385	1.5477	13	2.92308	1.97744	1.61538	1.1209	2.15385	2.23033	2	1.87083	2	2.08167	13	2.46154	1.61325	1.38462	0.960769	1.38462	0.767948	1.07692	0.27735	1.30769	0.630425	1	H	none	undifferentiated		unclassified
831	gefahr	niebezpieczeństwo	26	1.34615	0.977438	3.23077	1.94541	3.15385	2.12964	5.61538	1.32897	2.23077	1.50486	12	1	0	3.75	2.22077	3.5	2.57611	6	1.20605	2.41667	1.67649	14	1.64286	1.27745	2.78571	1.62569	2.85714	1.70326	5.28571	1.38278	2.07143	1.38477	1	F	F	F		F
1011	himmel	niebo	27	5.88889	1.62512	1.14815	0.533761	1.40741	1.08342	1.92593	1.56711	1.07407	0.26688	14	6.42857	0.937614	1	0	1.42857	1.08941	1.64286	1.21574	1	0	13	5.30769	2.01596	1.30769	0.751068	1.38462	1.1209	2.23077	1.87767	1.15385	0.375534	1	H	H	H		H
2556	unlust	niechęć	26	1.34615	1.05612	4.07692	1.93748	3.38462	1.6267	3.15385	1.84808	4.19231	2.0595	12	1.33333	0.651339	4.41667	1.97523	3.33333	1.61433	3.5	2.0226	5.08333	2.23437	14	1.35714	1.33631	3.78571	1.92867	3.42857	1.6968	2.85714	1.70326	3.42857	1.60357	1	D	none	undifferentiated		unclassified
2549	ungeduld	niecierpliwość	26	1.15385	0.612686	3.88462	2.10384	2.38462	1.55118	2.42308	1.96312	2.5	1.79444	12	1.33333	0.887625	3.75	2.37888	2.25	1.65831	2.66667	2.26969	2.16667	1.85047	14	1	0	4	1.92154	2.5	1.5064	2.21429	1.71772	2.78571	1.76193	1	A	none	A		A
1351	lieblos	nieczuły	26	1.26923	0.666795	3.57692	1.79272	4.88462	1.72805	3.34615	1.95841	2.65385	1.95841	13	1.15385	0.375534	4.07692	1.801	5.69231	1.49358	4.15385	2.0755	2.61538	1.75777	13	1.38462	0.869718	3.07692	1.70595	4.07692	1.60528	2.53846	1.5064	2.69231	2.21302		S	none	S		S
2645	versehen	niedopatrzenie	26	1.26923	0.533494	4.57692	1.92194	3.23077	1.96586	3.84615	1.93271	2.65385	2.17149	13	1.07692	0.27735	5	1.77951	3.46154	2.25889	4.46154	2.02548	2.84615	2.54448	13	1.46154	0.660225	4.15385	2.03495	3	1.68325	3.23077	1.69085	2.46154	1.8081	1	A	none	undifferentiated		unclassified
2543	unding	niedorzeczny	27	1.59259	1.08342	3.66667	1.88108	2.2963	1.40917	2.25926	1.72298	2.25926	1.58339	14	1.78571	1.25137	4.21429	1.84718	2.71429	1.68379	3	2.0755	2.92857	1.8172	13	1.38462	0.869718	3.07692	1.801	1.84615	0.898717	1.46154	0.660225	1.53846	0.877058	1	A	none	A		A
2594	verboten	niedozwolony	26	1.53846	1.27219	3.69231	1.8925	2.84615	1.8263	3.26923	2.05052	1.84615	1.34736	15	1.66667	1.34519	3.86667	2.03072	3.2	1.74028	3.26667	2.08624	1.8	0.941124	11	1.36364	1.20605	3.45455	1.75292	2.36364	1.91169	3.27273	2.10195	1.90909	1.81409		A	none	undifferentiated		unclassified
2231	sonntag	niedziela	26	4.38462	2.06062	1.92308	1.74179	1.84615	1.54123	1.53846	1.06699	1.38462	0.982931	11	5.18182	1.53741	1.81818	1.53741	2.09091	1.57826	1.45455	0.934199	1.27273	0.904534	15	3.8	2.24245	2	1.92725	1.66667	1.54303	1.6	1.18322	1.46667	1.0601	1	H	H	H		unclassified
2539	unart	niegrzeczny	26	1.46154	0.947872	3.88462	1.84015	2.38462	1.96116	2.11538	1.88312	2.19231	2.00038	12	1.16667	0.57735	4.16667	1.58592	2.16667	1.80067	1.83333	1.85047	2.25	1.91288	14	1.71429	1.13873	3.64286	2.06089	2.57143	2.13809	2.35714	1.94569	2.14286	2.14322	1	A	none	A		A
1051	illegal	nielegalny	26	1.57692	1.30148	3.57692	2.2122	2.65385	2.05801	4.30769	2.14978	2.53846	2.10201	11	1.36364	0.504525	4.09091	2.50817	2.54545	1.96792	4.90909	1.7581	3.27273	2.37027	15	1.73333	1.66762	3.2	1.97122	2.73333	2.18654	3.86667	2.35635	2	1.77281		F	none	undifferentiated		unclassified
2571	unwesen	nieład	26	1.69231	1.12318	4	1.6	2.76923	1.65669	2.84615	1.93271	3.19231	2.03998	14	1.21429	0.425815	3.78571	1.52812	2.78571	1.62569	2.35714	1.7368	2.64286	2.02322	12	2.25	1.42223	4.25	1.71226	2.75	1.76455	3.41667	2.06522	3.83333	1.94625	1	A	none	undifferentiated		unclassified
2552	ungnade	niełaska	27	1.40741	0.971092	3.18519	1.81949	3.14815	1.70302	2.88889	1.90815	2.03704	1.65207	14	1.57143	1.08941	3.14286	1.79131	2.85714	1.9945	2.85714	1.9945	1.57143	1.15787	13	1.23077	0.83205	3.23077	1.92154	3.46154	1.33012	2.92308	1.89128	2.53846	1.98391	1	A	none	undifferentiated		unclassified
236	baby	niemowlę	27	5.03704	1.55617	1.59259	1.04731	1.14815	0.456045	3.22222	1.90815	1.2963	0.6688	14	5.21429	1.67233	1.35714	0.633324	1.07143	0.267261	3	1.96116	1.14286	0.363137	13	4.84615	1.46322	1.84615	1.3445	1.23077	0.599145	3.46154	1.89804	1.46154	0.877058	1	H	H	H		unclassified
2347	stumm	niemy	26	1.38462	0.941357	2.46154	1.79401	4.46154	2.02447	2.65385	1.89615	2.07692	1.85306	15	1.4	1.0556	2.33333	1.71825	4.2	2.14476	2.93333	1.83095	2.2	1.85934	11	1.36364	0.80904	2.63636	1.9633	4.81818	1.88776	2.27273	2.00454	1.90909	1.92117		S	none	S		S
2368	tadellos	nienaganny	26	3.73077	1.75631	1.73077	1.4299	1.5	1.06771	1.46154	0.811456	1.38462	1.09825	11	4.27273	1.73729	2	1.73205	1.90909	1.30035	1.72727	1.00905	1.27273	0.904534	15	3.33333	1.71825	1.53333	1.18723	1.2	0.774597	1.26667	0.593617	1.46667	1.24595		H	H	H		unclassified
965	hassen	nienawidzić	27	1.2963	1.06752	5.03704	2.04716	4.11111	2.1543	3.25926	2.06793	2.85185	2.0885	14	1.28571	1.06904	5.57143	1.45255	4.42857	2.31099	3.07143	2.269	2.57143	1.98898	13	1.30769	1.1094	4.46154	2.47034	3.76923	2.0064	3.46154	1.89804	3.15385	2.23033		A	none	undifferentiated		unclassified
2878	zufall	nieoczekiwany	26	3.07692	1.85306	1.84615	1.1897	1.46154	0.859338	2.88462	1.53172	1.38462	0.982931	12	3.25	1.48477	1.83333	0.937437	1.41667	0.668558	2.41667	1.1645	1.16667	0.389249	14	2.92857	2.1649	1.85714	1.40642	1.5	1.01905	3.28571	1.72888	1.57143	1.28388	1	H	none	blended	HF	F
280	bedürfen	nieodzowny	27	2.40741	1.64689	1.7037	0.992852	1.88889	1.25064	1.96296	1.31505	1.59259	1.15223	14	2.35714	1.33631	2.07143	0.997249	2.5	1.40055	2.35714	1.15073	2	1.41421	13	2.46154	1.98391	1.30769	0.85485	1.23077	0.599145	1.53846	1.39137	1.15385	0.5547		H	none	undifferentiated		unclassified
2572	unwetter	niepogoda	26	1.26923	0.603834	2.69231	1.40767	3.92308	1.64738	1.57692	1.06482	1.88462	1.33647	12	1.16667	0.57735	2.66667	1.49747	3.91667	0.996205	1.5	1	1.83333	1.2673	14	1.35714	0.633324	2.71429	1.38278	3.92857	2.09263	1.64286	1.15073	1.92857	1.43925	1	S	none	S		S
2563	unruhe	niepokój	26	1.07692	0.271746	2.42308	1.55366	3.76923	2.02599	5.34615	1.8098	2.73077	2.29011	12	1	0	2.33333	1.07309	3.91667	1.97523	5.5	1.3817	2.5	2.15322	14	1.14286	0.363137	2.5	1.9115	3.64286	2.13423	5.21429	2.15473	2.92857	2.46403	1	F	none	F		F
1909	ratlos	nieporadny	26	1.23077	0.58704	3.92308	1.89574	3.30769	2.01533	2.15385	2.05314	2.76923	2.23263	12	1.33333	0.778499	4.5	1.93061	3.33333	2.22928	1.83333	1.85047	3.58333	2.57464	14	1.14286	0.363137	3.42857	1.78516	3.28571	1.89852	2.42857	2.24343	2.07143	1.68543		A	none	undifferentiated		unclassified
133	anomal	nieprawidłowy	26	1.5	1.30384	3.69231	1.78369	2.80769	1.35703	2.80769	1.49718	2.11538	1.50537	14	1.07143	0.267261	3	1.96116	2.5	1.01905	2.35714	1.27745	1.57143	1.01635	12	2	1.80907	4.5	1.16775	3.16667	1.64225	3.33333	1.61433	2.75	1.76455		A	none	undifferentiated		A
659	erzfeind	nieprzyjaciel	26	1.46154	1.10384	3.84615	2.03356	2.61538	1.74532	3.38462	1.91994	2.84615	2.03356	12	1.41667	0.900337	3.66667	1.66969	2.58333	1.56428	2.75	1.42223	2	0.953463	14	1.5	1.28602	4	2.35339	2.64286	1.94569	3.92857	2.1649	3.57143	2.4405	1	A	none	undifferentiated		unclassified
2559	unnahbar	nieprzystępny	26	1.23077	0.58704	3.42308	1.57919	3.26923	1.86671	3.23077	1.65669	2.23077	1.42289	15	1.26667	0.593617	3.33333	1.67616	3.4	1.95667	3.46667	1.59762	2	1.19523	11	1.18182	0.603023	3.54545	1.50756	3.09091	1.81409	2.90909	1.7581	2.54545	1.69491		A	none	undifferentiated		unclassified
1937	reglos	nieruchomy	26	1.69231	1.12318	2.30769	1.73826	2.57692	1.79272	3	2.1166	1.69231	1.4634	14	1.14286	0.363137	2.07143	1.68543	2.57143	1.91007	3.14286	2.41333	1.28571	0.726273	12	2.33333	1.37069	2.58333	1.83196	2.58333	1.72986	2.83333	1.80067	2.16667	1.94625		F	none	undifferentiated		unclassified
1442	makellos	nieskazitelny	26	3.92308	1.95802	1.5	1.02956	1.30769	0.549125	1.61538	1.09825	1.61538	1.23538	12	4.08333	1.67649	1.83333	1.40346	1.41667	0.668558	1.66667	1.07309	1.75	1.42223	14	3.78571	2.22498	1.21429	0.425815	1.21429	0.425815	1.57143	1.15787	1.5	1.09193		H	H	H		unclassified
2526	uferlos	nieskończony	27	3.07407	2.07412	2.14815	1.48593	2.07407	1.38469	3.40741	2.0803	1.2963	0.992852	14	2.64286	1.90575	2.28571	1.54066	2	1.56893	3.5	2.13937	1.42857	1.34246	13	3.53846	2.22169	2	1.47196	2.15385	1.21423	3.30769	2.09701	1.15385	0.375534		F	none	undifferentiated		unclassified
2548	ungeahnt	niespodziewany	26	3.61538	1.85638	2.23077	1.42289	1.80769	1.16685	3.42308	1.62906	1.69231	1.12318	13	4.15385	2.03495	2.38462	1.3253	2.07692	1.32045	3.69231	1.4367	1.92308	1.25576	13	3.07692	1.5525	2.07692	1.5525	1.53846	0.967418	3.15385	1.81871	1.46154	0.967418		H	none	blended	HF	unclassified
2000	ruhelos	niespokojny	27	1.37037	0.687702	3.11111	1.5525	2.96296	1.62863	4.48148	1.78391	2.22222	1.69464	14	1.28571	0.468807	3	1.61722	2.85714	1.46009	4.35714	1.7368	2.21429	1.62569	13	1.46154	0.877058	3.23077	1.5359	3.07692	1.84669	4.61538	1.89466	2.23077	1.83275		F	none	F		F
2561	unrecht	niesprawiedliwy	26	1.11538	0.588348	5.07692	1.78713	4	1.67332	2.69231	1.71509	3.26923	1.84516	12	1	0	5	2.08893	4	1.70561	2.75	1.81534	3.08333	1.88092	14	1.21429	0.801784	5.14286	1.56191	4	1.7097	2.64286	1.69193	3.42857	1.86936	1	A	none	undifferentiated		A
2553	unheil	nieszczęście	26	1.23077	0.815239	4.46154	1.79401	5.53846	1.79401	4.88462	2.02636	2.73077	1.84516	15	1.2	0.774597	4.2	1.82052	6	1.51186	5.26667	1.66762	2.66667	1.87718	11	1.27273	0.904534	4.81818	1.77866	4.90909	2.0226	4.36364	2.41962	2.81818	1.88776	1	S	none	blended	SFA	unclassified
2071	scheu	nieśmiały	27	1.66667	0.83205	1.96296	1.25519	3	1.6641	3.07407	1.99857	1.62963	1.00568	14	2	0.877058	2.21429	1.3688	3.64286	1.64584	3.78571	1.80506	1.64286	0.744946	13	1.30769	0.630425	1.69231	1.1094	2.30769	1.4367	2.30769	1.97419	1.61538	1.26085		F	none	blended	SF	unclassified
2399	taumeln	nietrzeźwy	27	1.77778	1.18754	3.48148	1.98785	3.18519	2.16683	3.18519	2.01984	3.85185	1.97491	14	1.85714	1.16732	4.21429	2.04483	4.14286	2.0327	4.21429	2.11873	4.5	2.13937	13	1.69231	1.25064	2.69231	1.6525	2.15385	1.86396	2.07692	1.18754	3.15385	1.57301		D	none	undifferentiated		unclassified
2544	unfair	nieuczciwy	26	1.30769	0.884047	5	1.69706	3.92308	2.01838	3.65385	2.09652	4.23077	2.17821	13	1.61538	1.19293	5.07692	2.06	3.76923	2.31495	3.46154	2.25889	4.30769	2.42846	13	1	0	4.92308	1.32045	4.07692	1.75412	3.84615	1.99358	4.15385	1.99358		A	none	undifferentiated		unclassified
2644	versager	nieudacznik	27	1.11111	0.320256	3.62963	1.75736	4.62963	1.64429	3.18519	2.01984	3.18519	2.11291	14	1.07143	0.267261	3.57143	1.60357	5.14286	1.51186	3.85714	2.24832	2.64286	2.16997	13	1.15385	0.375534	3.69231	1.97419	4.07692	1.65638	2.46154	1.5064	3.76923	1.96443	1	S	none	undifferentiated		unclassified
164	argwohn	nieufność	27	1.22222	0.50637	3.48148	1.82652	3.44444	1.57708	4.44444	1.96769	2.66667	1.94145	14	1.14286	0.363137	3.64286	2.30742	3.85714	1.91581	5	2.0381	2.92857	2.09263	13	1.30769	0.630425	3.30769	1.18213	3	1	3.84615	1.77229	2.38462	1.80455	1	F	none	undifferentiated		unclassified
2540	unbefugt	nieuprawniony	26	1.19231	0.491466	3.57692	1.98339	2.57692	2.10092	2.73077	2.14584	2	1.85472	11	1.18182	0.40452	3.45455	1.75292	2.36364	1.85864	2.63636	1.9633	1.54545	1.21356	15	1.2	0.560612	3.66667	2.19306	2.73333	2.31352	2.8	2.33605	2.33333	2.19306		A	none	undifferentiated		A
2542	undank	niewdzięczny	26	1.19231	0.633671	4.57692	1.70113	3.92308	1.93748	1.92308	1.57285	4	1.95959	12	1.08333	0.288675	4.66667	1.61433	4.33333	1.72328	1.83333	1.85047	3.41667	2.10878	14	1.28571	0.82542	4.5	1.82925	3.57143	2.1018	2	1.35873	4.5	1.74312	1	A	none	blended	ADS	unclassified
2570	untreue	niewierność	27	1.33333	1.03775	5.40741	1.75979	4.96296	2.04716	4.96296	2.17471	4.88889	2.40725	14	1.14286	0.363137	6.28571	1.20439	5.71429	1.93862	5.5	2.21012	6	1.92154	13	1.53846	1.45002	4.46154	1.8081	4.15385	1.90815	4.38462	2.06311	3.69231	2.35884	1	A	none	undifferentiated		unclassified
2484	treulos	niewierny	26	1.30769	0.679366	4.92308	1.95802	5.11538	1.92514	4.53846	2.1951	4.76923	2.30318	13	1.15385	0.5547	5.53846	1.89804	5.53846	1.98391	5.07692	2.13937	5.15385	2.40992	13	1.46154	0.77625	4.30769	1.88788	4.69231	1.84321	4	2.19848	4.38462	2.2188		S	none	undifferentiated		unclassified
2564	unschuld	niewinny	26	3.69231	2.05464	1.42308	0.902134	1.92308	1.38342	1.53846	1.10384	1.15385	0.612686	12	3.16667	2.08167	1.41667	0.668558	2.41667	1.67649	1.33333	0.492366	1.08333	0.288675	14	4.14286	1.9945	1.42857	1.08941	1.5	0.94054	1.71429	1.43734	1.21429	0.801784	1	H	none	H		unclassified
2214	sklavin	niewolnica	26	1.57692	1.4191	4.69231	1.80597	5	1.44222	4.57692	1.96312	4.07692	2.17114	15	1.6	1.40408	5	1.81265	5.26667	1.57963	5.26667	1.48645	3.93333	2.28244	11	1.54545	1.50756	4.27273	1.79393	4.63636	1.20605	3.63636	2.2033	4.27273	2.10195	1	S	none	undifferentiated		unclassified
2213	sklave	niewolniczy	26	1.26923	0.603834	4.73077	1.88802	4.80769	1.69751	4.30769	2.13109	3.96154	2.08769	14	1.14286	0.534522	4.78571	1.96815	4.85714	2.0702	4.5	2.24465	3.85714	2.34872	12	1.41667	0.668558	4.66667	1.87487	4.75	1.21543	4.08333	2.06522	4.08333	1.83196	1	S	none	undifferentiated		unclassified
2541	unbequem	niewygodny	27	1.62963	1.49739	3.51852	1.69548	2.25926	1.6075	1.81481	1.03912	2.44444	1.8674	14	1.5	1.3445	3.71429	1.9779	1.85714	1.29241	1.64286	0.928783	2.78571	2.32639	13	1.76923	1.69085	3.30769	1.37747	2.69231	1.84321	2	1.1547	2.07692	1.18754		A	none	undifferentiated		A
2893	zwanglos	niewymuszony	26	3.65385	1.99885	1.42308	0.945434	1.73077	1.40165	1.34615	0.628796	1.23077	0.514408	12	3.83333	1.58592	1.08333	0.288675	1.16667	0.389249	1.08333	0.288675	1.08333	0.288675	14	3.5	2.34521	1.71429	1.20439	2.21429	1.76193	1.57143	0.755929	1.35714	0.633324		H	none	H		unclassified
1680	niete	niewypał	26	1.5	1.33417	3.69231	2.32842	2.96154	2.19965	3.61538	2.13686	2.46154	2.1768	12	1.41667	0.900337	3.25	2.26134	2.66667	2.05971	3.58333	2.15146	2.58333	2.15146	14	1.57143	1.65084	4.07143	2.40078	3.21429	2.35922	3.64286	2.20514	2.35714	2.27384	1	A	none	undifferentiated		unclassified
541	ehelos	niezamężny	27	2.37037	1.75736	1.74074	1.43024	2.2963	1.65981	2.18519	1.6879	1.2963	0.724028	14	2.42857	1.86936	1.92857	1.85904	2.14286	1.51186	2.28571	1.85757	1.14286	0.363137	13	2.30769	1.70219	1.53846	0.77625	2.46154	1.85362	2.07692	1.5525	1.46154	0.967418		H	none	undifferentiated		unclassified
2551	ungesund	niezdrowy	26	1.42308	0.808608	2.96154	1.88639	3.07692	1.83135	3	1.91833	3.19231	1.98029	12	1.66667	1.07309	2.58333	1.62135	2.58333	1.50504	2.41667	1.44338	2.41667	1.50504	14	1.21429	0.425815	3.28571	2.09132	3.5	2.02864	3.5	2.17503	3.85714	2.14322		D	none	undifferentiated		unclassified
2546	unfriede	niezgoda	27	1.37037	0.791695	3.88889	1.64862	3.55556	1.73944	2.81481	1.77671	2.11111	1.45002	14	1.35714	0.633324	4.21429	1.76193	4.07143	1.89997	3.5	2.06621	2.57143	1.65084	13	1.38462	0.960769	3.53846	1.5064	3	1.41421	2.07692	1.03775	1.61538	1.04391	1	A	none	undifferentiated		A
1337	leugnung	niezgodny	27	1.66667	1.24035	3.59259	1.39392	2.66667	1.68705	2.59259	1.50024	2.25926	1.50876	14	1.78571	1.42389	4.21429	1.25137	3.42857	1.6968	3.07143	1.38477	2.64286	1.39268	13	1.53846	1.05003	2.92308	1.25576	1.84615	1.28103	2.07692	1.49786	1.84615	1.57301	1	A	none	undifferentiated		A
1908	rastlos	niezmordowany	26	3.88462	2.28608	1.38462	0.752432	1.69231	1.12318	1.57692	0.986836	1.26923	0.724303	11	3.81818	2.27236	1.63636	1.02691	1.72727	1.27208	2	1.26491	1.36364	0.924416	15	3.93333	2.37447	1.2	0.414039	1.66667	1.04654	1.26667	0.593617	1.2	0.560612		H	none	H		unclassified
2767	weltfern	nieżyciowy	26	1.46154	0.989172	3.76923	2.10348	3.34615	2.05801	2.53846	1.70249	2.65385	1.83177	14	1.28571	0.82542	3.92857	2.20015	3.35714	2.16997	2.14286	1.51186	2.64286	1.94569	12	1.66667	1.1547	3.58333	2.06522	3.33333	2.01509	3	1.85864	2.66667	1.77525		A	none	undifferentiated		unclassified
1290	leblos	nieżywy	26	1.11538	0.431455	3.19231	2.26308	5.69231	1.59422	5.34615	1.85348	3.69231	2.1683	15	1.2	0.560612	3.13333	2.13363	5.66667	1.39728	5.6	1.54919	3.73333	2.21897	11	1	0	3.27273	2.53341	5.72727	1.90215	5	2.23607	3.63636	2.2033		S	none	blended	SF	unclassified
1681	nikotin	nikotyna	26	1.23077	0.514408	4.19231	2.3836	4	2.41661	3.30769	2.4943	4.57692	2.28338	12	1.16667	0.389249	5.08333	2.4293	4.5	2.81231	3.91667	2.90637	5.5	2.43086	14	1.28571	0.61125	3.42857	2.13809	3.57143	2.02729	2.78571	2.04483	3.78571	1.88837	1	D	none	undifferentiated		unclassified
1678	niemand	nikt	26	1.53846	1.20767	1.61538	1.0612	3.42308	1.85845	2.42308	1.60432	1.76923	1.1767	12	1.25	0.866025	1.58333	0.900337	3.75	1.71226	2.33333	1.37069	1.5	1.16775	14	1.78571	1.42389	1.64286	1.21574	3.14286	1.9945	2.5	1.82925	2	1.1767		S	none	undifferentiated		S
2638	vernichten	niszczyć	26	1.53846	1.42073	4.38462	1.89899	3	1.81108	3.03846	1.68477	2.69231	1.76112	12	1.5	1.16775	4.33333	1.77525	3.58333	1.50504	2.83333	1.40346	2.33333	1.43548	14	1.57143	1.65084	4.42857	2.06488	2.5	1.95133	3.21429	1.92867	3	2		A	none	A		A
56	adeln	nobilitować	26	3.30769	2.11224	1.57692	1.30148	1.38462	1.09825	1.42308	0.902134	1.38462	1.23538	14	3.14286	2.24832	1.64286	1.21574	1.5	1.40055	1.28571	0.61125	1.28571	1.06904	12	3.5	2.0226	1.5	1.446	1.25	0.621582	1.58333	1.1645	1.5	1.446		H	none	H		unclassified
1628	nacht	noc	26	3.5	2.10238	1.34615	0.79711	2.61538	1.96116	2.84615	1.64176	1.46154	0.859338	12	4.08333	2.31432	1.08333	0.288675	2.83333	2.12489	2.91667	1.37895	1.25	0.621582	14	3	1.83973	1.57143	1.01635	2.42857	1.86936	2.78571	1.88837	1.64286	1.00821	1	H	none	blended	HFS	unclassified
1646	nase	nos	27	2.2963	1.56438	1.66667	1.07417	1.55556	1.05003	1.40741	1.00992	1.51852	1.01414	14	2.14286	1.65748	1.57143	0.851631	1.64286	1.15073	1.35714	0.841897	1.28571	0.468807	13	2.46154	1.5064	1.76923	1.30089	1.46154	0.967418	1.46154	1.19829	1.76923	1.36344	1	H	none	undifferentiated		N
2458	tragen	nosić	26	2.15385	1.68979	2.07692	1.54721	2.11538	1.72805	2.11538	1.84015	1.80769	1.35703	12	2.33333	1.72328	2.33333	1.82574	2	1.95402	2.16667	2.2088	1.75	1.21543	14	2	1.7097	1.85714	1.29241	2.21429	1.57766	2.07143	1.54244	1.85714	1.51186		H	none	undifferentiated		unclassified
2457	trage	nosze	26	1.34615	0.891843	2.61538	2.13686	3.73077	2.14584	3.73077	2.14584	2.11538	1.86176	11	1.36364	1.20605	3.18182	2.63887	4.54545	2.25227	3.90909	2.16585	2.45455	2.33939	15	1.33333	0.617213	2.2	1.65616	3.13333	1.9223	3.6	2.1974	1.86667	1.45733	1	none	none	undifferentiated		unclassified
1685	notar	notariusz	26	1.57692	1.20576	2.57692	1.87985	2.57692	1.74753	3.07692	1.83135	2.11538	1.79615	14	1.35714	1.08182	2	1.75412	2.64286	2.09788	3	1.96116	1.5	1.60528	12	1.83333	1.33712	3.25	1.86474	2.5	1.31426	3.16667	1.74946	2.83333	1.80067	1	F	none	undifferentiated		unclassified
1688	notiz	notować	26	1.92308	1.3542	2.03846	1.39945	1.65385	1.38397	1.73077	1.25085	1.76923	1.1767	12	2.08333	1.44338	1.91667	1.1645	1.75	1.28806	1.83333	1.02986	1.41667	0.996205	14	1.78571	1.3114	2.14286	1.61041	1.57143	1.50457	1.64286	1.44686	2.07143	1.26881	1	A	none	undifferentiated		N
1555	modern	nowoczesny	26	4	1.44222	2.15385	1.4613	1.65385	1.19808	2.65385	1.6957	2	1.41421	13	3.92308	1.11516	2.30769	1.49358	1.61538	1.38675	2.84615	1.95133	2.15385	1.72463	13	4.07692	1.75412	2	1.47196	1.69231	1.03155	2.46154	1.45002	1.84615	1.06819		H	none	H		unclassified
2506	tumor	nowotwór	26	1.19231	0.800961	3.69231	2.07402	4.65385	2.05801	5.30769	1.84974	3	2.07846	12	1.08333	0.288675	3.08333	1.97523	4.41667	1.88092	4.66667	1.77525	3	1.90693	14	1.28571	1.06904	4.21429	2.08211	4.85714	2.24832	5.85714	1.79131	3	2.28709	1	F	none	undifferentiated		unclassified
2068	schere	nożyczki	26	1.76923	1.24283	2.03846	1.73161	1.69231	1.59422	3.19231	2.07883	1.76923	1.68066	15	1.6	1.29835	1.86667	1.76743	1.6	1.68184	3.46667	1.99523	1.73333	1.62422	11	2	1.18322	2.27273	1.73729	1.81818	1.53741	2.81818	2.22792	1.81818	1.83402	1	F	none	undifferentiated		F
1507	messer	nóż	26	1.73077	1.21845	3.53846	2.0829	2.53846	1.9643	4.5	1.94422	2.73077	2.08917	13	1.46154	0.967418	4.38462	1.89466	3.23077	2.24179	5.46154	1.45002	3.15385	2.26738	13	2	1.41421	2.69231	1.97419	1.84615	1.40512	3.53846	1.94145	2.30769	1.88788	1	F	none	undifferentiated		unclassified
1693	nuklear	nuklearny	26	1.65385	1.32491	2.80769	1.98029	3	2.05913	4.61538	2.06062	2.76923	2.21464	15	1.4	0.910259	2.6	1.76473	2.8	2.00713	4.2	2.33605	2.86667	1.95911	11	2	1.73205	3.09091	2.3002	3.27273	2.19504	5.18182	1.53741	2.63636	2.61812		F	none	F		unclassified
2396	tauchen	nurkować	26	4.23077	2.10348	1.15385	0.367946	1.30769	0.617688	2.96154	1.88639	1.34615	0.79711	14	4	2.41788	1.21429	0.425815	1.28571	0.61125	3.14286	1.9945	1.28571	0.726273	12	4.5	1.73205	1.08333	0.288675	1.33333	0.651339	2.75	1.81534	1.41667	0.900337		H	none	blended	HF	unclassified
1695	oase	oaza	26	5.38462	1.44435	1.07692	0.271746	1.30769	0.679366	1.38462	0.941357	1	0	11	5.54545	1.12815	1.09091	0.301511	1.45455	0.8202	1.81818	1.32802	1	0	15	5.26667	1.66762	1.06667	0.258199	1.2	0.560612	1.06667	0.258199	1	0	1	H	H	H		H
806	furcht	obawa	26	1.42308	1.30148	2.42308	1.77027	3.30769	1.8925	4.80769	1.62528	2.15385	1.59229	12	1.33333	0.887625	2.08333	1.83196	3.58333	1.97523	5.08333	1.50504	2.33333	1.87487	14	1.5	1.60528	2.71429	1.72888	3.07143	1.85904	4.57143	1.74154	2	1.35873	1	F	none	F		F
33	absatz	obcas	26	3.07692	2.20768	2	1.64924	1.96154	1.77721	1.53846	1.17408	1.53846	1.47596	13	4.07692	2.10006	2.38462	1.80455	2.61538	2.2188	1.76923	1.42325	1.46154	1.6641	13	2.07692	1.89128	1.61538	1.44559	1.30769	0.85485	1.30769	0.85485	1.61538	1.3253	1	H	none	undifferentiated		unclassified
320	belastung	obciążać	26	1.11538	0.588348	3.30769	1.78369	2.92308	1.74179	2.57692	1.70113	1.92308	1.38342	12	1.25	0.866025	3.25	1.3568	2.91667	1.67649	2.41667	1.67649	2	1.04447	14	1	0	3.35714	2.13423	2.92857	1.85904	2.71429	1.77281	1.85714	1.65748		A	none	undifferentiated		A
2852	zerlumpt	obdarty	26	1.07692	0.392232	2.69231	1.71509	3.84615	1.91191	3.03846	2.08769	3.61538	1.69887	15	1.13333	0.516398	2.73333	1.90738	3.53333	1.99523	2.93333	2.0166	3.26667	1.70992	11	1	0	2.63636	1.50151	4.27273	1.79393	3.18182	2.27236	4.09091	1.6404		S	none	undifferentiated		unclassified
2528	umarmen	obejmować	26	4.96154	1.68477	1.26923	0.533494	1.84615	1.31734	1.65385	1.29437	1.30769	0.884047	12	5	1.80907	1.25	0.621582	1.75	1.13818	1.5	0.797724	1.16667	0.57735	14	4.92857	1.63915	1.28571	0.468807	1.92857	1.49174	1.78571	1.62569	1.42857	1.08941		H	H	H		unclassified
1697	objekt	obiekt	26	1.96154	1.18257	1.65385	1.05612	1.61538	1.23538	1.53846	0.989172	1.42308	1.30148	14	1.5	0.94054	1.5	0.94054	1.14286	0.363137	1.42857	0.755929	1.28571	0.82542	12	2.5	1.24316	1.83333	1.19342	2.16667	1.64225	1.66667	1.23091	1.58333	1.72986	1	H	none	undifferentiated		N
1541	mirakel	objawienie	26	3.65385	1.64784	1.76923	1.24283	1.30769	0.617688	2.46154	1.42073	1.5	1.02956	14	3.28571	1.77281	1.64286	1.00821	1.35714	0.744946	2.21429	1.52812	1.42857	1.08941	12	4.08333	1.44338	1.91667	1.50504	1.25	0.452267	2.75	1.28806	1.58333	0.996205	1	H	none	H		unclassified
1918	razzia	obława	26	1.5	1.02956	2.84615	2.03356	3	1.74356	4.5	1.94422	2.69231	1.99538	13	1.38462	0.869718	3	2.19848	2.92308	1.89128	4.92308	2.10006	2.92308	2.28989	13	1.61538	1.19293	2.69231	1.93152	3.07692	1.65638	4.07692	1.75412	2.46154	1.71345	1	F	none	F		F
1068	irre	obłąkany	26	1.42308	0.757526	2.30769	1.76112	3.23077	2.15977	4.65385	1.83177	3.15385	2.09174	12	1.16667	0.389249	2.58333	2.02073	3.58333	2.4293	5.5	1.62369	3.83333	2.28963	14	1.64286	0.928783	2.07143	1.54244	2.92857	1.94004	3.92857	1.73046	2.57143	1.78516		F	none	F		F
1070	irrsinn	obłędny	27	3.88889	2.37508	1.74074	1.25859	1.51852	1.18874	2.59259	1.84514	2.03704	1.698	14	4.42857	2.4405	1.5	1.16024	1.35714	0.744946	1.71429	1.06904	1.42857	0.755929	13	3.30769	2.25036	2	1.35401	1.69231	1.54837	3.53846	2.06621	2.69231	2.17503	1	H	none	undifferentiated		unclassified
2169	senken	obniżać	27	2.11111	1.76141	2.66667	1.68705	2.51852	1.74026	2.74074	1.76706	2	1.56893	14	2.71429	2.05421	2.57143	1.74154	2.85714	1.79131	2.57143	1.74154	1.85714	1.46009	13	1.46154	1.1266	2.76923	1.69085	2.15385	1.67562	2.92308	1.84669	2.15385	1.72463		F	none	undifferentiated		unclassified
1794	pflicht	obowiązkowy	27	3.25926	2.08645	2.74074	1.6075	1.77778	1.1209	2.25926	1.65466	1.51852	0.752962	14	3.42857	1.94992	2.42857	1.82775	1.92857	1.26881	2.42857	1.94992	1.35714	0.744946	13	3.07692	2.28989	3.07692	1.32045	1.61538	0.960769	2.07692	1.32045	1.69231	0.751068	1	H	none	undifferentiated		unclassified
860	gelten	obowiązywać	26	1.80769	1.16685	2.53846	1.60576	1.88462	1.36607	1.92308	1.41204	1.69231	1.15825	12	1.83333	1.19342	2.41667	1.78164	1.75	1.48477	1.66667	1.07309	1.25	0.621582	14	1.78571	1.18831	2.64286	1.49908	2	1.30089	2.14286	1.65748	2.07143	1.38477		A	none	undifferentiated		A
1269	lager	obóz	26	2.30769	2.01533	2.65385	2.24397	3.23077	2.28574	3.15385	2.12964	2.5	2.02485	11	2.63636	2.4606	3.09091	2.62505	3.81818	2.44206	3.63636	2.3355	2.54545	2.42337	15	2.06667	1.66762	2.33333	1.9518	2.8	2.14476	2.8	1.97122	2.46667	1.76743	1	S	none	undifferentiated		unclassified
332	berauben	obrabować	27	1.55556	1.2195	4.92593	2.14702	3.92593	2.11089	5.18519	1.73287	4	2.48069	14	1.14286	0.363137	5.21429	1.96815	4.64286	2.02322	5.71429	1.43734	4.07143	2.43261	13	2	1.63299	4.61538	2.36426	3.15385	1.99358	4.61538	1.89466	3.92308	2.62874		F	none	undifferentiated		unclassified
1130	kehren	obracać	26	2.46154	1.81617	1.96154	1.42775	1.61538	1.0612	1.73077	1.18516	1.73077	1.45761	15	2.33333	1.63299	2.06667	1.66762	1.66667	1.17514	1.86667	1.30201	1.66667	1.39728	11	2.63636	2.11058	1.81818	1.07872	1.54545	0.934199	1.54545	1.03573	1.81818	1.60114		H	none	undifferentiated		unclassified
2372	tagung	obradować	27	2.51852	1.60217	2.33333	1.64083	1.85185	1.48593	2.18519	1.59415	1.81481	1.52005	14	3.07143	1.89997	2.64286	2.02322	2.07143	1.8172	2.64286	1.98483	2.07143	1.85904	13	1.92308	0.954074	2	1.08012	1.61538	1.04391	1.69231	0.85485	1.53846	1.05003	1	H	none	undifferentiated		unclassified
385	bild	obraz	26	3.38462	2.2641	1.61538	1.29852	2.19231	1.69751	1.84615	1.8263	1.57692	1.4744	13	4	2.16025	1.84615	1.67562	2.61538	2.18092	2	2.23607	1.53846	1.6641	13	2.76923	2.27866	1.38462	0.767948	1.76923	0.926809	1.69231	1.37747	1.61538	1.3253	1	H	none	undifferentiated		unclassified
1478	maulen	obrażony	26	1.07692	0.271746	4.03846	1.79957	3.57692	1.77027	2.61538	1.87781	1.96154	1.6366	12	1.16667	0.389249	3.16667	1.40346	3.5	1.62369	2.58333	1.67649	1.25	0.452267	14	1	0	4.78571	1.80506	3.64286	1.94569	2.64286	2.09788	2.57143	2.02729		A	none	undifferentiated		A
2471	trauring	obrączka	26	4.92308	1.85306	1.42308	0.902134	1.61538	0.982931	2.5	1.50333	1.34615	0.891843	15	5.06667	1.66762	1.4	0.910259	1.6	1.0556	2.53333	1.55226	1.2	0.560612	11	4.72727	2.149	1.45455	0.934199	1.63636	0.924416	2.45455	1.50756	1.54545	1.21356	1	H	H	H		unclassified
2747	wehr	obronny	26	2.96154	2.12567	1.5	0.905539	1.34615	0.845804	2.46154	1.55514	1.26923	0.827415	12	3.16667	2.2088	1.66667	1.07309	1.16667	0.389249	2.25	1.3568	1.08333	0.288675	14	2.78571	2.11873	1.35714	0.744946	1.5	1.09193	2.64286	1.7368	1.42857	1.08941	1	H	none	blended	HF	unclassified
2532	umsatz	obrót	26	2.30769	1.87124	1.42308	1.02657	1.19231	0.491466	1.92308	1.09263	1.15385	0.464095	12	2.75	2.22077	1.16667	0.57735	1.16667	0.57735	1.83333	1.11464	1.16667	0.57735	14	1.92857	1.49174	1.64286	1.27745	1.21429	0.425815	2	1.1094	1.14286	0.363137	1	H	none	undifferentiated		N
106	anekeln	obrzydliwy	26	1.34615	1.19808	3.03846	2.10677	2.5	2.19545	2.65385	1.87494	5.42308	1.87985	12	1	0	2.83333	2.03753	2.33333	2.10339	2.83333	1.99241	5.83333	1.58592	14	1.64286	1.59842	3.21429	2.22498	2.64286	2.34052	2.5	1.82925	5.07143	2.09263		D	D	D		D
578	ekel	obrzydzenie	26	1.11538	0.588348	3.26923	2.10823	2.46154	2.0829	3.26923	2.12711	5.5	1.81659	12	1	0	3.25	2.26134	2.33333	1.87487	3.83333	2.03753	6	1.53741	14	1.21429	0.801784	3.28571	2.05421	2.57143	2.31099	2.78571	2.15473	5.07143	1.97929	1	D	D	D		D
357	betrachten	obserwować	26	2.30769	1.66779	1.34615	0.689481	1.34615	0.79711	1.96154	1.07632	1.26923	0.827415	12	1.91667	0.996205	1.41667	0.514929	1.33333	0.651339	2	1.20605	1.25	0.866025	14	2.64286	2.06089	1.28571	0.82542	1.35714	0.928783	1.92857	0.997249	1.28571	0.82542		H	none	undifferentiated		N
523	dreck	obskurny	27	1.55556	1.39596	2.77778	1.67179	3.14815	1.95534	2.92593	1.93998	4.33333	1.83973	14	1.64286	1.44686	3.28571	1.85757	4.28571	1.72888	3.85714	1.9945	5.21429	1.57766	13	1.46154	1.39137	2.23077	1.30089	1.92308	1.38212	1.92308	1.32045	3.38462	1.66024	1	D	none	undifferentiated		D
277	bedienen	obsługiwać	27	2.48148	1.31179	2.33333	1.49358	1.81481	1.35978	2.2963	1.63648	2.18519	1.49453	14	2.28571	1.38278	2.71429	1.72888	2.21429	1.67233	2.71429	1.93862	2.71429	1.68379	13	2.69231	1.25064	1.92308	1.11516	1.38462	0.767948	1.84615	1.14354	1.61538	1.04391		H	none	undifferentiated		unclassified
2781	wetten	obstawiać	26	2.80769	1.83345	1.80769	1.16685	1.46154	1.02882	3	1.69706	1.34615	0.891843	12	2.58333	1.31137	1.83333	1.02986	1.5	1.16775	2.41667	1.24011	1.25	0.621582	14	3	2.2188	1.78571	1.3114	1.42857	0.937614	3.5	1.9115	1.42857	1.08941		F	none	undifferentiated		F
823	gebiet	obszar	26	2.15385	1.89087	1.46154	0.904689	1.61538	1.20256	1.80769	1.13205	1.53846	1.42073	12	2	1.53741	1.58333	1.08362	1.83333	1.64225	1.66667	1.07309	1.75	1.86474	14	2.28571	2.1989	1.35714	0.744946	1.42857	0.646206	1.92857	1.20667	1.35714	0.928783	1	H	none	undifferentiated		N
2013	sabbern	obślinić	26	1.69231	1.19228	2	1.13137	1.26923	0.666795	1.69231	1.12318	4.26923	1.66271	12	1.5	0.904534	1.58333	0.668558	1.25	0.452267	1.83333	1.19342	4.83333	1.74946	14	1.85714	1.40642	2.35714	1.33631	1.28571	0.82542	1.57143	1.08941	3.78571	1.47693		D	D	D		D
4	abbau	obumierać	26	1.30769	0.788377	2.92308	1.64738	4.92308	1.69524	4.65385	1.49512	2.88462	1.84015	13	1.23077	0.83205	3.15385	1.95133	5.53846	1.6641	4.92308	1.70595	2.84615	2.19265	13	1.38462	0.767948	2.69231	1.31559	4.30769	1.54837	4.38462	1.26085	2.92308	1.49786	1	S	none	blended	SF	unclassified
2089	schlaff	obwisły	26	1.11538	0.431455	3.11538	1.98649	2.88462	2.00653	3.23077	2.08437	4.84615	1.93271	15	1.13333	0.516398	3.26667	2.15362	3.2	2.11119	3.13333	2.06559	4.8	2.14476	11	1.09091	0.301511	2.90909	1.81409	2.45455	1.86353	3.36364	2.2033	4.90909	1.70027		D	none	D		D
1727	ozean	ocean	27	4.66667	1.68705	1.40741	0.797074	1.7037	1.06752	2.88889	2.0064	1.59259	1.42125	14	4.78571	1.52812	1.35714	0.841897	1.71429	1.13873	2.71429	1.89852	1.57143	1.15787	13	4.53846	1.89804	1.46154	0.77625	1.69231	1.03155	3.07692	2.17798	1.61538	1.7097	1	H	H	H		unclassified
1686	note	ocena	26	2.88462	1.50537	3	1.64924	2.73077	1.53773	4.03846	1.92833	1.92308	1.49461	15	2.6	1.35225	3.33333	1.58865	3.26667	1.75119	4.8	1.61245	1.93333	1.43759	11	3.27273	1.67874	2.54545	1.69491	2	0.774597	3	1.89737	1.90909	1.6404	1	F	none	undifferentiated		unclassified
2849	zensur	ocenzurowany	26	1.26923	0.666795	3.26923	1.92993	2.84615	1.84808	2.46154	1.67883	3.15385	1.99384	15	1.13333	0.516398	3.26667	1.98086	2.86667	1.99523	2.33333	1.44749	2.86667	1.64172	11	1.45455	0.8202	3.27273	1.95402	2.81818	1.72152	2.63636	2.01359	3.54545	2.42337	1	A	none	undifferentiated		unclassified
663	essig	ocet	27	1.62963	1.00568	1.55556	1.1547	1.77778	1.36814	1.59259	1.30853	3.37037	1.94438	14	1.57143	1.08941	1.28571	0.82542	1.78571	1.62569	1.64286	1.64584	3.64286	1.94569	13	1.69231	0.947331	1.84615	1.40512	1.76923	1.09193	1.53846	0.877058	3.07692	1.97744	1	D	none	D		D
1408	lust	ochota	26	4.84615	1.61722	1.26923	0.724303	1.30769	0.837579	1.65385	1.09334	1.26923	0.724303	12	4.5	1.446	1.25	0.621582	1.33333	1.1547	1.33333	0.887625	1.41667	0.996205	14	5.14286	1.74784	1.28571	0.82542	1.28571	0.468807	1.92857	1.20667	1.14286	0.363137	1	H	H	H		unclassified
2696	vorsorge	ochraniać	26	4.53846	2.04413	2	1.54919	1.96154	1.53573	3.03846	2.19965	1.69231	1.59422	11	5.81818	1.53741	1.90909	1.3751	1.90909	1.22103	3.18182	2.0405	1.27273	0.904534	15	3.6	1.88225	2.06667	1.70992	2	1.77281	2.93333	2.37447	2	1.92725	1	H	none	H		unclassified
2134	schutz	ochrona	26	4.03846	1.90748	1.92308	1.19743	1.5	0.812404	2.34615	1.49512	1.80769	1.47022	15	4.33333	1.9518	2.06667	1.09978	1.73333	0.96115	2.6	1.40408	1.73333	1.38701	11	3.63636	1.85864	1.72727	1.3484	1.18182	0.40452	2	1.61245	1.90909	1.6404	1	H	none	H		unclassified
2487	triefen	ociekać	27	2.77778	1.78311	1.92593	1.38469	1.59259	1.04731	1.74074	1.19591	2.66667	1.56893	14	2.71429	1.9779	1.85714	1.23146	1.57143	1.15787	1.71429	1.26665	2.78571	1.42389	13	2.84615	1.62512	2	1.58114	1.61538	0.960769	1.76923	1.16575	2.53846	1.76141		H	none	undifferentiated		unclassified
650	erwarten	oczekiwać	26	3.15385	2.05314	2.11538	1.75104	1.92308	1.57285	2.30769	1.80597	1.5	1.06771	12	3.91667	2.23437	2.08333	1.92865	1.41667	0.514929	2.58333	1.88092	1.5	1	14	2.5	1.69842	2.14286	1.65748	2.35714	2.02322	2.07143	1.77436	1.5	1.16024		H	none	undifferentiated		unclassified
651	erwartung	oczekiwanie	27	3.37037	2.23861	2.40741	1.5995	2.33333	1.27098	3.33333	2.05688	1.7037	1.4888	14	3.85714	2.34872	2.42857	1.82775	2.35714	1.33631	4	2.32048	1.57143	1.34246	13	2.84615	2.0755	2.38462	1.38675	2.30769	1.25064	2.61538	1.50214	1.84615	1.67562		H	none	undifferentiated		unclassified
1949	reinheit	oczyszczać	26	2.73077	1.90909	1.65385	1.12933	1.30769	0.679366	1.69231	1.22537	2.03846	1.3109	12	2.5	1.446	1.5	0.797724	1.33333	0.492366	1.5	0.797724	2.16667	1.52753	14	2.92857	2.269	1.78571	1.3688	1.28571	0.82542	1.85714	1.51186	1.92857	1.14114	1	H	none	undifferentiated		unclassified
585	empfangen	odbierać	26	2.38462	1.67516	2.42308	1.92194	1.96154	1.50946	2.80769	2.00038	1.73077	1.34336	12	2	1.20605	3.08333	2.46644	2.33333	1.96946	2.58333	2.02073	1.91667	1.50504	14	2.71429	1.9779	1.85714	1.09945	1.64286	0.928783	3	2.0381	1.57143	1.2225		F	none	undifferentiated		unclassified
9	abdruck	odbitka	26	2.03846	1.61197	1.23077	0.58704	1.38462	0.803837	1.19231	0.567044	1.19231	0.567044	12	1.66667	1.23091	1.16667	0.389249	1.5	0.797724	1.25	0.621582	1.16667	0.57735	14	2.35714	1.86495	1.28571	0.726273	1.28571	0.82542	1.14286	0.534522	1.21429	0.578934	1	H	none	undifferentiated		N
587	empfinden	odczuwać	26	4.07692	1.93748	1.61538	1.09825	2.23077	1.63236	2.38462	1.49872	1.57692	0.945434	14	4	2.18386	1.57143	1.01635	2.5	1.9115	2.21429	1.62569	1.35714	0.633324	12	4.16667	1.6967	1.66667	1.23091	1.91667	1.24011	2.58333	1.37895	1.83333	1.19342		H	none	H		unclassified
1332	lesung	odczyt	27	2.11111	1.39596	1.48148	0.752962	1.74074	1.31829	2.11111	1.64862	1.44444	0.891556	14	2.5	1.60528	1.57143	0.755929	2	1.56893	2.5	1.9115	1.64286	1.08182	13	1.69231	1.03155	1.38462	0.767948	1.46154	0.967418	1.69231	1.25064	1.23077	0.599145	1	none	none	undifferentiated		N
597	entfernen	oddalony	27	1.74074	1.28879	2.59259	1.71552	3.77778	1.71718	3.62963	1.8006	1.44444	0.847319	14	1.42857	0.937614	2.71429	2.01642	4.21429	1.67233	3.64286	2.09788	1.35714	0.744946	13	2.07692	1.5525	2.46154	1.39137	3.30769	1.70219	3.61538	1.50214	1.53846	0.967418		S	none	undifferentiated		S
19	abgeben	oddawać	26	2.57692	1.70113	2.23077	1.65669	2.38462	1.52517	1.65385	1.09334	1.5	1.30384	12	3	1.80907	2.25	1.42223	2	1.2792	1.5	0.522233	1.16667	0.389249	14	2.21429	1.57766	2.21429	1.88837	2.71429	1.68379	1.78571	1.42389	1.78571	1.71772		H	none	undifferentiated		unclassified
183	atmung	oddychać	26	4	1.95959	1.30769	0.837579	1.23077	0.514408	1.53846	0.760567	1.03846	0.196116	12	3.83333	1.99241	1.16667	0.389249	1.25	0.452267	1.41667	0.668558	1.08333	0.288675	14	4.14286	1.9945	1.42857	1.08941	1.21429	0.578934	1.64286	0.841897	1	0	1	H	H	H		unclassified
2503	truppe	oddział	27	1.88889	1.33973	2.07407	1.70803	1.96296	1.45395	2.77778	1.80455	1.66667	1.1094	14	1.64286	0.744946	2.42857	2.1018	2.57143	1.74154	3.21429	2.08211	1.78571	1.3114	13	2.15385	1.77229	1.69231	1.1094	1.30769	0.630425	2.30769	1.37747	1.53846	0.877058	1	F	none	undifferentiated		unclassified
230	auswirkung	oddziaływanie	26	2.84615	1.99384	1.73077	0.961569	1.38462	0.803837	1.84615	1.15559	1.34615	0.628796	14	2.28571	1.81568	1.71429	0.99449	1.28571	0.61125	1.71429	1.20439	1.21429	0.425815	12	3.5	2.06706	1.75	0.965307	1.5	1	2	1.12815	1.5	0.797724		H	none	undifferentiated		unclassified
17	abgang	odejście	27	1.66667	0.877058	3.66667	2.2014	4.85185	2.01349	4.37037	2.25573	1.92593	1.20658	14	1.64286	0.841897	4.71429	2.01642	5.35714	2.30742	5.42857	2.17377	1.85714	1.09945	13	1.69231	0.947331	2.53846	1.85362	4.30769	1.54837	3.23077	1.7867	2	1.35401	1	S	none	blended	SFA	unclassified
186	aufatmen	odetchnąć	27	4.59259	1.94658	1.81481	1.64169	1.81481	1.46857	1.92593	1.49167	1.18519	0.68146	14	4.64286	2.13423	2.07143	1.97929	2.21429	1.80506	1.85714	1.56191	1.21429	0.801784	13	4.53846	1.8081	1.53846	1.19829	1.38462	0.869718	2	1.47196	1.15385	0.5547		H	H	H		unclassified
1389	lossagen	odizolowany	26	1.11538	0.431455	3	1.87617	4.65385	2.01876	4.23077	1.94541	2.73077	2.03091	15	1.06667	0.258199	3.2	1.93465	5.26667	1.90738	4.46667	2.09989	2.33333	1.87718	11	1.18182	0.603023	2.72727	1.84883	3.81818	1.94001	3.90909	1.7581	3.27273	2.19504		S	none	undifferentiated		unclassified
13	abfahrt	odjazd	26	2.84615	2.12964	2.23077	1.88271	3.53846	2.0636	2.53846	1.74885	1.5	1.10454	13	3.07692	2.49872	2.30769	2.01596	4.07692	2.21591	2.84615	2.1543	1.69231	1.49358	13	2.61538	1.75777	2.15385	1.81871	3	1.82574	2.23077	1.23517	1.30769	0.480384	1	S	none	undifferentiated		unclassified
594	entdecken	odkrywać	26	4.23077	1.70429	1.26923	0.603834	1.34615	0.745241	2.65385	1.46812	1.19231	0.491466	15	4	1.85164	1.33333	0.617213	1.53333	0.915475	2.86667	1.59762	1.13333	0.351866	11	4.54545	1.50756	1.18182	0.603023	1.09091	0.301511	2.36364	1.28629	1.27273	0.64667		H	none	H		unclassified
15	abflug	odlatywać	26	4.57692	2.15728	1.34615	0.628796	1.53846	0.904689	2.03846	1.3109	1.11538	0.325813	15	4.33333	2.22539	1.33333	0.617213	1.66667	1.1127	2	1.41421	1.13333	0.351866	11	4.90909	2.11918	1.36364	0.6742	1.36364	0.504525	2.09091	1.22103	1.09091	0.301511	1	H	H	H		unclassified
598	entfernung	odległość	27	2.44444	1.94804	2.66667	1.79743	3.33333	1.92154	3.18519	1.86129	1.77778	1.47631	14	2.14286	1.83375	2.92857	2.01778	4	2.0755	3.42857	2.13809	1.85714	1.65748	13	2.76923	2.08782	2.38462	1.55662	2.61538	1.50214	2.92308	1.5525	1.69231	1.31559		S	none	undifferentiated		unclassified
2665	verweigern	odmawiać	26	1.88462	1.72805	3.23077	2.04563	3.11538	2.06547	3.38462	2.00154	2.61538	2.13686	12	1.66667	1.61433	3.66667	2.05971	3.41667	2.31432	3.58333	1.88092	3.25	2.52713	14	2.07143	1.85904	2.85714	2.0327	2.85714	1.87523	3.21429	2.15473	2.07143	1.63915		F	none	undifferentiated		unclassified
32	absage	odmowa	26	1.23077	0.815239	4.42308	1.72448	4.15385	1.75937	3.69231	2.03508	2.53846	2.0636	12	1.33333	1.1547	4.16667	1.6967	4	1.65145	3.66667	1.92275	2.33333	2.14617	14	1.14286	0.363137	4.64286	1.78054	4.28571	1.89852	3.71429	2.1989	2.71429	2.05421	1	A	none	undifferentiated		unclassified
36	abseits	odosobniony	26	1.57692	1.20576	3.30769	1.93431	5.23077	1.7276	4.26923	2.20105	2.38462	1.94066	13	1.53846	1.1266	3.38462	2.29269	5.61538	1.89466	4.30769	2.3939	2.38462	2.32875	13	1.61538	1.3253	3.23077	1.58923	4.84615	1.51911	4.23077	2.08782	2.38462	1.55662		S	none	undifferentiated		unclassified
14	abfall	odpady	27	1.18519	0.622466	3.18519	2.05758	2.44444	1.28103	2.33333	1.51911	4.51852	2.20786	14	1	0	2.92857	2.12908	2.35714	1.27745	2.21429	1.12171	4.71429	2.1989	13	1.38462	0.869718	3.46154	2.02548	2.53846	1.33012	2.46154	1.89804	4.30769	2.28709	1	D	none	undifferentiated		D
48	abwehr	odpierać	26	2.5	1.92354	2.61538	1.83471	1.57692	0.902134	2.69231	1.76112	1.80769	1.20064	12	3.41667	2.06522	2.83333	2.03753	1.75	1.05529	3.25	1.71226	2.16667	1.19342	14	1.71429	1.43734	2.42857	1.6968	1.42857	0.755929	2.21429	1.71772	1.5	1.16024	1	F	none	undifferentiated		unclassified
148	antworten	odpowiadać	26	2.34615	1.49512	1.96154	1.24838	1.80769	1.20064	3.03846	1.68477	1.69231	1.25759	12	2.75	1.71226	1.91667	1.50504	1.91667	1.37895	3	1.70561	1.41667	0.900337	14	2	1.24035	2	1.03775	1.71429	1.06904	3.07143	1.73046	1.92857	1.49174		F	none	undifferentiated		F
948	haftung	odpowiedzialny	26	4.80769	1.62528	1.76923	1.47804	2.23077	1.77331	3.5	2.26716	1.5	1.02956	13	5.07692	1.70595	1.84615	1.72463	2.30769	2.05688	4.38462	2.2188	1.46154	0.967418	13	4.53846	1.56074	1.69231	1.25064	2.15385	1.51911	2.61538	2.02231	1.53846	1.1266	1	H	none	H		unclassified
147	antwort	odpowiedź	26	3.42308	2.2658	1.65385	0.977438	1.61538	0.982931	2.46154	1.65483	1.46154	0.989172	11	3.72727	2.53341	1.81818	1.25045	1.81818	1.25045	2.90909	1.92117	1.18182	0.603023	15	3.2	2.11119	1.53333	0.743223	1.46667	0.743223	2.13333	1.40746	1.66667	1.17514	1	H	none	undifferentiated		unclassified
193	aufgeben	odpuścić	26	2.57692	2.15728	3.38462	1.96116	3.07692	1.64738	2.42308	1.70113	2.15385	1.56697	12	2.75	2.4168	3.75	2.0505	3.25	1.48477	2.75	2.00567	2	1.3484	14	2.42857	1.98898	3.07143	1.89997	2.92857	1.8172	2.14286	1.40642	2.28571	1.77281		A	none	undifferentiated		unclassified
2873	zögern	odraczać	26	1.73077	1.53773	3.11538	1.9458	2.84615	1.7133	3.46154	1.79401	1.96154	1.50946	13	1.92308	1.89128	3.46154	2.06621	2.92308	1.5525	3.69231	1.70219	1.38462	0.869718	13	1.53846	1.1266	2.76923	1.83275	2.76923	1.92154	3.23077	1.92154	2.53846	1.8081		F	none	undifferentiated		unclassified
34	abscheu	odrażający	26	1.07692	0.392232	2.38462	1.79057	2.38462	2.04112	3.61538	2.22849	5.23077	1.86135	12	1.16667	0.57735	2.33333	1.87487	2.25	2.00567	3.66667	2.01509	5.25	1.71226	14	1	0	2.42857	1.78516	2.5	2.13937	3.57143	2.47182	5.21429	2.04483	1	D	none	D		D
28	ablehnen	odrzucać	26	1.34615	1.05612	4.30769	1.95488	4.03846	1.84349	3.96154	2.06844	2.76923	1.98611	12	1.25	0.621582	4.66667	2.05971	4.33333	2.05971	4.41667	1.97523	2.83333	2.08167	14	1.42857	1.34246	4	1.88108	3.78571	1.67233	3.57143	2.13809	2.71429	1.9779		A	none	undifferentiated		unclassified
1892	quote	odsetek	26	1.80769	1.44275	2.07692	1.41204	1.84615	1.15559	1.92308	1.32433	1.84615	1.15559	13	1.61538	1.19293	1.92308	1.44115	1.84615	1.3445	2.07692	1.5525	2	1.29099	13	2	1.68325	2.23077	1.42325	1.84615	0.987096	1.76923	1.09193	1.69231	1.03155	1	A	none	undifferentiated		unclassified
2868	zins	odsetki	26	2.80769	2.07883	2.84615	1.9533	2.76923	2.10348	3.26923	2.1644	2.30769	2.03508	15	1.93333	1.33452	3	1.36277	2.8	1.78085	3.93333	1.83095	2.13333	1.50555	11	4	2.36643	2.63636	2.61812	2.72727	2.57258	2.36364	2.3355	2.54545	2.65946	1	F	none	undifferentiated		unclassified
39	abstand	odstęp	26	1.76923	1.24283	1.76923	1.10662	1.69231	0.928191	1.84615	1.00766	1.53846	1.10384	15	1.8	1.26491	2	1.25357	1.86667	0.99043	1.93333	1.0328	1.4	0.910259	11	1.72727	1.27208	1.45455	0.8202	1.45455	0.8202	1.72727	1.00905	1.72727	1.3484	1	F	none	undifferentiated		N
1612	mut	odwaga	27	5.51852	1.78391	1.85185	1.45981	1.7037	1.56438	2.37037	1.75736	1.14815	0.456045	14	5.92857	1.38477	1.57143	1.08941	1.64286	1.64584	2.42857	1.74154	1.07143	0.267261	13	5.07692	2.10006	2.15385	1.77229	1.76923	1.5359	2.30769	1.84321	1.23077	0.599145		H	H	H		unclassified
1614	mutig	odważny	26	5	1.38564	1.61538	0.982931	2	1.6	3	2	1.19231	0.69393	13	4.69231	1.75046	1.69231	1.18213	2.30769	1.93152	3.61538	2.29269	1.15385	0.5547	13	5.30769	0.85485	1.53846	0.77625	1.69231	1.18213	2.38462	1.50214	1.23077	0.83205		H	H	H		unclassified
353	besuchen	odwiedzać	27	4.44444	1.71718	1.62963	1.00568	1.59259	1.00992	2.48148	1.67264	1.48148	1.08735	14	4.78571	1.76193	1.64286	1.08182	1.78571	1.25137	2.64286	1.59842	1.42857	1.08941	13	4.07692	1.65638	1.61538	0.960769	1.38462	0.650444	2.30769	1.79743	1.53846	1.1266		H	H	H		unclassified
2770	wenden	odwracać	26	1.53846	1.02882	2.23077	1.39449	2.53846	1.55514	2.69231	1.56893	1.73077	1.56353	15	1.53333	0.833809	2.26667	1.62422	2.4	1.72378	2.8	1.69874	1.53333	1.24595	11	1.54545	1.29334	2.18182	1.07872	2.72727	1.3484	2.54545	1.4397	2	1.94936		F	none	undifferentiated		unclassified
605	entzug	odwyk	27	1.88889	1.8674	2.66667	1.81871	3.88889	2.06311	3.74074	2.14104	3.48148	2.17274	14	1.5	0.94054	3.71429	1.81568	4.42857	1.86936	4.28571	1.81568	4	2.14834	13	2.30769	2.49615	1.53846	0.967418	3.30769	2.17503	3.15385	2.37508	2.92308	2.13937	1	S	none	undifferentiated		unclassified
1273	lanze	odznaczać	26	3.38462	2.22849	1.61538	1.35873	1.73077	1.21845	1.84615	1.37673	1.53846	0.947872	12	3.91667	1.97523	1.83333	1.40346	1.83333	1.11464	2.08333	1.44338	1.75	1.13818	14	2.92857	2.40078	1.42857	1.34246	1.64286	1.33631	1.64286	1.33631	1.35714	0.744946	1	H	none	H		unclassified
196	aufleben	odżywać	26	4.96154	1.58697	1.46154	0.811456	1.34615	0.745241	1.69231	0.970329	1.30769	0.735893	13	5.38462	1.50214	1.46154	0.660225	1.61538	0.960769	1.76923	0.926809	1.15385	0.375534	13	4.53846	1.61325	1.46154	0.967418	1.07692	0.27735	1.61538	1.04391	1.46154	0.967418		H	H	H		unclassified
809	futter	odżywczy	26	4.19231	2.00038	1.42308	0.856648	1.26923	0.724303	1.5	1.10454	1.53846	1.24035	12	4.58333	1.56428	1.5	1	1.16667	0.389249	1.33333	0.651339	1.25	0.452267	14	3.85714	2.31574	1.35714	0.744946	1.35714	0.928783	1.64286	1.39268	1.78571	1.62569	1	H	H	H		unclassified
103	anbieten	oferować	26	3.23077	1.81786	2.15385	1.4613	1.46154	0.989172	2.03846	1.07632	1.96154	1.61197	11	4	2.04939	2	1.54919	1.18182	0.603023	1.81818	0.873863	1.27273	0.904534	15	2.66667	1.44749	2.26667	1.43759	1.66667	1.17514	2.2	1.20712	2.46667	1.84649		H	none	undifferentiated		unclassified
113	angebot	oferta	27	3.7037	1.5396	1.33333	0.784465	1.33333	0.877058	2.14815	1.2921	1.25926	0.655896	14	3.85714	1.02711	1.21429	0.578934	1.42857	1.08941	1.92857	0.997249	1.07143	0.267261	13	3.53846	1.98391	1.46154	0.967418	1.23077	0.599145	2.38462	1.55662	1.46154	0.877058	1	H	H	H		unclassified
1708	opfer	ofiara	26	1.42308	1.10175	3.96154	2.06844	5	1.62481	4.73077	1.84516	3.15385	2.37811	13	1.23077	0.83205	4.46154	2.18386	5.38462	1.80455	4.92308	2.13937	3.30769	2.6263	13	1.61538	1.3253	3.46154	1.89804	4.61538	1.38675	4.53846	1.56074	3	2.19848	1	S	none	undifferentiated		unclassified
1709	opfern	ofiarować	26	4.30769	1.93431	1.23077	0.514408	1.76923	1.33589	1.80769	1.23351	1.23077	0.514408	15	4.4	2.1974	1.33333	0.617213	1.93333	1.57963	2	1.36277	1.13333	0.351866	11	4.18182	1.60114	1.09091	0.301511	1.54545	0.934199	1.54545	1.03573	1.36364	0.6742		H	H	H		unclassified
1701	offizier	oficer	26	2.42308	1.55366	1.73077	1.21845	1.42308	0.945434	2.5	1.39284	1.65385	1.46812	12	2.66667	1.43548	1.66667	0.778499	1.5	1	2.5	1.16775	1.58333	0.900337	14	2.21429	1.67233	1.78571	1.52812	1.35714	0.928783	2.5	1.60528	1.71429	1.85757	1	F	none	undifferentiated		unclassified
719	feuer	ogień	27	3.25926	1.91337	2.37037	1.9245	2.59259	1.94658	3.40741	2.00498	1.62963	1.3344	14	3.07143	1.97929	2.28571	1.68379	2.85714	1.91581	3.85714	1.95555	1.64286	0.928783	13	3.46154	1.89804	2.46154	2.22169	2.30769	2.01596	2.92308	2.01914	1.61538	1.7097	1	F	none	undifferentiated		unclassified
720	feurig	ognisty	27	3.33333	1.88108	2.14815	1.63387	1.51852	0.752962	2.55556	1.82574	1.40741	0.843949	14	4.14286	1.40642	2.28571	1.43734	1.5	0.759555	3.07143	1.94004	1.5	0.85485	13	2.46154	1.98391	2	1.87083	1.53846	0.77625	2	1.58114	1.30769	0.85485		H	none	undifferentiated		unclassified
940	gurke	ogórek	26	3.26923	2.14584	1.38462	1.0612	1.53846	1.33359	1.34615	1.12933	1.46154	1.30325	14	3	2.0381	1.14286	0.363137	1.42857	0.937614	1.21429	0.801784	1.28571	0.726273	12	3.58333	2.31432	1.66667	1.49747	1.66667	1.72328	1.5	1.446	1.66667	1.77525	1	H	none	H		unclassified
557	einengen	ograniczać	27	1.18519	0.395847	5.22222	1.47631	3.66667	1.88108	3.11111	1.80455	2.96296	2.13904	14	1.21429	0.425815	5.42857	1.65084	4.14286	1.9945	3.42857	1.82775	3.21429	2.22498	13	1.15385	0.375534	5	1.29099	3.15385	1.67562	2.76923	1.7867	2.69231	2.09701		A	A	A		A
816	garten	ogród	26	5.69231	1.4634	1.23077	0.429669	1.92308	1.23038	1.57692	1.02657	1.07692	0.271746	14	5.78571	1.84718	1.21429	0.425815	1.85714	1.23146	1.64286	1.21574	1	0	12	5.58333	0.900337	1.25	0.452267	2	1.2792	1.5	0.797724	1.16667	0.389249	1	H	H	H		H
984	heizung	ogrzewanie	26	4.5	1.90263	1.34615	0.628796	1.23077	0.514408	1.15385	0.367946	1.26923	0.603834	12	4.16667	2.03753	1.16667	0.389249	1.16667	0.389249	1.08333	0.288675	1.16667	0.389249	14	4.78571	1.80506	1.5	0.759555	1.28571	0.61125	1.21429	0.425815	1.35714	0.744946	1	H	H	H		unclassified
150	anwidern	ohydny	26	1.19231	0.800961	3.03846	1.84349	2.73077	1.95054	3.88462	1.88312	5.61538	2.09908	14	1	0	2.71429	1.68379	2.57143	1.98898	3.85714	2.0702	5.5	2.13937	12	1.41667	1.1645	3.41667	2.02073	2.91667	1.97523	3.91667	1.72986	5.75	2.13733		D	none	D		D
2580	vater	ojciec	26	4.61538	2.09908	2.19231	1.44275	2.15385	1.48842	2.03846	1.34107	1.26923	0.603834	11	5.09091	1.81409	2.63636	1.74773	2.54545	1.63485	2.36364	1.62928	1.36364	0.6742	15	4.26667	2.28244	1.86667	1.12546	1.86667	1.35576	1.8	1.08233	1.2	0.560612	1	H	H	H		unclassified
978	heimat	ojczyzna	27	4.55556	1.88788	1.77778	1.33973	2.59259	1.64689	2.2963	1.63648	1.48148	1.18874	14	4.92857	1.77436	1.42857	0.755929	2.35714	1.78054	2.35714	1.7368	1.35714	1.08182	13	4.15385	1.99358	2.15385	1.72463	2.84615	1.51911	2.23077	1.58923	1.61538	1.3253	1	H	H	H		unclassified
2628	verletzung	okaleczony	27	1.2963	0.823446	3.44444	2.1183	4.7037	1.70553	3.7037	2.10886	3.55556	1.96769	14	1.07143	0.267261	4.35714	2.23975	5.42857	1.39859	4.14286	2.31574	3.71429	2.33464	13	1.53846	1.1266	2.46154	1.5064	3.92308	1.70595	3.23077	1.83275	3.38462	1.55662		S	none	undifferentiated		unclassified
2094	schlapp	oklapnięty	27	1.51852	0.975483	2.44444	1.5525	3.03704	1.74271	1.96296	1.7205	2.07407	1.75249	14	1.35714	0.841897	2.78571	1.52812	3.28571	1.5898	1.71429	1.20439	1.85714	1.83375	13	1.69231	1.1094	2.07692	1.5525	2.76923	1.92154	2.23077	2.16617	2.30769	1.70219		S	none	undifferentiated		S
311	beifall	oklaski	26	5.42308	1.30148	1.46154	1.02882	1.15385	0.464095	1.65385	1.23101	1.26923	1.00231	14	5.71429	1.06904	1.28571	0.82542	1.07143	0.267261	1.5	1.01905	1.07143	0.267261	12	5.08333	1.50504	1.66667	1.23091	1.25	0.621582	1.83333	1.4668	1.5	1.446	1	H	H	H		H
317	bejubeln	oklaskiwać	26	4.73077	1.97094	1.38462	0.803837	1.34615	0.689481	1.38462	0.852147	1.34615	1.01754	14	4.5	2.24465	1.42857	0.937614	1.5	0.85485	1.21429	0.425815	1.14286	0.363137	12	5	1.65145	1.33333	0.651339	1.16667	0.389249	1.58333	1.1645	1.58333	1.44338		H	H	H		unclassified
707	fenster	okno	27	3.55556	1.67179	1.33333	0.784465	1.96296	1.55617	2.14815	1.72546	1.25926	0.764229	14	4.14286	1.51186	1.28571	0.61125	2.35714	1.82323	2.35714	1.82323	1.14286	0.534522	13	2.92308	1.65638	1.38462	0.960769	1.53846	1.1266	1.92308	1.65638	1.38462	0.960769	1	H	none	H		unclassified
208	auge	oko	27	3	1.90142	1.33333	0.733799	1.48148	1.08735	1.77778	1.05003	1.33333	0.679366	14	3.14286	2.31574	1.28571	0.61125	1.28571	0.61125	2	1.30089	1.28571	0.726273	13	2.84615	1.40512	1.38462	0.869718	1.69231	1.4367	1.53846	0.660225	1.38462	0.650444	1	H	none	H		unclassified
836	gegend	okolica	26	3.38462	1.83471	1.42308	0.945434	1.61538	1.0612	1.46154	0.947872	1.34615	0.845804	12	2.91667	1.88092	1.16667	0.57735	1.41667	0.668558	1.25	0.621582	1.16667	0.389249	14	3.78571	1.76193	1.64286	1.15073	1.78571	1.3114	1.64286	1.15073	1.5	1.09193	1	H	none	H		unclassified
375	bezeichnen	określać	26	1.88462	1.58308	1.88462	1.63284	1.46154	0.947872	1.80769	1.32723	1.76923	1.45073	12	2	1.53741	2.58333	2.15146	1.66667	1.23091	2.33333	1.66969	2.25	1.91288	14	1.78571	1.67233	1.28571	0.61125	1.28571	0.61125	1.35714	0.744946	1.35714	0.744946		none	none	undifferentiated		N
2538	umweg	okrężny	27	1.44444	0.800641	2.66667	1.96116	1.7037	1.06752	1.62963	1.00568	1.55556	1.2195	14	1.28571	0.726273	3.07143	2.20015	1.64286	1.08182	1.57143	1.15787	1.78571	1.47693	13	1.61538	0.869718	2.23077	1.64083	1.76923	1.09193	1.69231	0.85485	1.30769	0.85485	1	A	none	undifferentiated		unclassified
2557	unmensch	okrutnik	26	1.11538	0.588348	3.88462	2.04601	3.42308	1.74753	4.46154	1.9643	3.73077	2.52282	13	1	0	4.84615	1.99358	3.69231	2.01596	5.38462	1.80455	4.30769	2.65784	13	1.23077	0.83205	2.92308	1.65638	3.15385	1.46322	3.53846	1.71345	3.15385	2.33973	1	F	none	undifferentiated		unclassified
923	grausam	okrutny	26	1.11538	0.431455	5.34615	1.67194	4.57692	1.65343	5.03846	1.94896	4.26923	2.25491	13	1	0	5.76923	1.87767	5.07692	1.70595	5.53846	2.14536	4.23077	2.58695	13	1.23077	0.599145	4.92308	1.38212	4.07692	1.49786	4.53846	1.6641	4.30769	1.97419		A	none	undifferentiated		unclassified
431	brille	okulary	26	2.38462	1.76809	2.03846	1.48272	1.84615	1.15559	1.88462	1.21085	1.30769	0.679366	14	2.14286	1.83375	1.85714	1.51186	1.5	0.759555	1.85714	1.35062	1.07143	0.267261	12	2.66667	1.72328	2.25	1.48477	2.25	1.42223	1.91667	1.08362	1.58333	0.900337	1	H	none	undifferentiated		unclassified
1974	riese	olbrzymi	27	3.14815	1.93557	1.51852	1.12217	1.37037	0.966681	3.14815	1.83353	1.44444	1.01274	14	3.07143	1.77436	1.92857	1.43925	1.64286	1.27745	3	1.75412	1.64286	1.27745	13	3.23077	2.16617	1.07692	0.27735	1.07692	0.27735	3.30769	1.97419	1.23077	0.599145	1	none	none	blended	FH	F
398	blei	ołów	26	1.57692	0.945434	2.03846	1.34107	1.76923	1.39449	2.73077	1.82335	2.07692	1.59808	14	1.21429	0.578934	1.71429	1.32599	1.64286	1.64584	2.42857	2.02729	1.78571	1.62569	12	2	1.12815	2.41667	1.31137	1.91667	1.08362	3.08333	1.56428	2.41667	1.56428	1	F	none	undifferentiated		F
88	altar	ołtarz	26	2.76923	1.79572	1.65385	1.05612	2	1.41421	1.92308	1.44009	1.65385	1.35476	11	3.54545	1.91644	1.18182	0.40452	2.36364	1.91169	2.36364	1.9633	1.63636	1.80404	15	2.2	1.52128	2	1.25357	1.73333	0.883715	1.6	0.828079	1.66667	0.9759	1	H	none	undifferentiated		unclassified
1705	omen	omen	26	1.69231	1.25759	2.23077	1.7506	2.5	1.58114	4.07692	2.01838	2.65385	2.01876	15	1.8	1.42428	1.86667	1.24595	2.6	1.59463	4	2.13809	2.2	1.78085	11	1.54545	1.03573	2.72727	2.24013	2.36364	1.62928	4.18182	1.94001	3.27273	2.24013	1	F	none	F		F
44	abtei	opactwo	26	2.84615	1.99384	1.26923	0.666795	1.5	0.989949	1.38462	0.852147	1.23077	0.58704	13	2.84615	2.11527	1.30769	0.751068	1.53846	1.05003	1.38462	0.767948	1.23077	0.599145	13	2.84615	1.95133	1.23077	0.599145	1.46154	0.967418	1.38462	0.960769	1.23077	0.599145	1	H	none	H		N
2195	sinken	opadać	26	1.53846	0.904689	2.42308	1.92194	3.30769	2.01533	3.11538	2.21498	1.84615	1.68979	11	2	1.18322	2.63636	2.06265	4.36364	1.74773	3.27273	2.3277	1.36364	0.924416	15	1.2	0.414039	2.26667	1.86956	2.53333	1.88478	3	2.20389	2.2	2.04241		S	none	undifferentiated		unclassified
1938	regnen	opady	26	1.92308	1.3542	2.84615	2.23951	3	2.03961	2.11538	1.81828	2.5	2.31948	11	2.36364	1.80404	2.45455	1.96792	2.90909	1.446	1.54545	1.03573	1.72727	1.84883	15	1.6	0.828079	3.13333	2.4456	3.06667	2.43389	2.53333	2.16685	3.06667	2.52039		S	none	undifferentiated		unclassified
2229	sonnen	opalony	27	4.44444	1.78311	1.25926	0.655896	1.22222	0.800641	1.40741	0.843949	1.37037	0.966681	14	4.71429	1.43734	1.28571	0.726273	1.35714	1.08182	1.42857	0.755929	1.14286	0.363137	13	4.15385	2.11527	1.23077	0.599145	1.07692	0.27735	1.38462	0.960769	1.61538	1.3253		H	H	H		unclassified
1495	meistern	opanować	26	3.88462	2.47106	1.92308	1.71868	1.76923	1.30561	2.34615	2.03848	1.42308	0.856648	12	4.25	2.17945	2	1.7581	1.91667	1.50504	2.33333	2.05971	1.58333	0.996205	14	3.57143	2.73761	1.85714	1.74784	1.64286	1.15073	2.35714	2.09788	1.28571	0.726273		H	none	H		unclassified
43	abt	opat	27	1.96296	1.65207	1.55556	0.9337	1.48148	0.802418	1.48148	0.802418	1.77778	1.08604	14	2.21429	2.00686	1.21429	0.578934	1.35714	0.633324	1.42857	0.755929	1.42857	0.851631	13	1.69231	1.18213	1.92308	1.11516	1.61538	0.960769	1.53846	0.877058	2.15385	1.21423		H	none	undifferentiated		N
2589	verband	opatrywać	26	2.96154	1.68477	2.26923	1.82335	3	1.81108	3.42308	1.96312	2.38462	1.85638	13	2.92308	1.65638	2.38462	1.85016	3.61538	2.18092	4.38462	1.75777	2.76923	2.16617	13	3	1.77951	2.15385	1.86396	2.38462	1.1209	2.46154	1.71345	2	1.47196	1	F	none	undifferentiated		unclassified
1707	oper	opera	26	3.26923	1.84516	1.65385	1.41258	1.69231	1.22537	1.46154	1.17408	1.80769	1.62528	12	3.5	1.88294	1.58333	1.37895	1.41667	0.996205	1.66667	1.61433	1.75	1.86474	14	3.07143	1.85904	1.71429	1.48989	1.92857	1.38477	1.28571	0.61125	1.85714	1.46009	1	H	none	H		unclassified
1696	obhut	opieka	27	4.96296	1.65207	1.66667	1.07417	1.92593	1.49167	2.18519	1.44214	1.25926	0.655896	14	5.28571	1.20439	1.5	0.94054	1.78571	1.52812	2.21429	1.47693	1	0	13	4.61538	2.02231	1.84615	1.21423	2.07692	1.49786	2.15385	1.46322	1.53846	0.877058	1	H	H	H		unclassified
1793	pflegen	opiekuńczy	26	5.46154	1.58065	1.57692	1.36156	1.42308	1.13747	1.69231	1.49048	1.30769	0.884047	12	5.75	1.65831	1.66667	1.72328	1.58333	1.44338	1.83333	1.85047	1.33333	0.651339	14	5.21429	1.52812	1.5	1.01905	1.28571	0.82542	1.57143	1.15787	1.28571	1.06904		H	H	H		unclassified
1492	meinung	opinia	27	2.51852	1.64948	2.25926	1.6075	2.07407	1.63909	2.96296	2.12098	1.66667	1.24035	14	2.71429	1.85757	1.92857	1.49174	2	1.75412	3.5	2.13937	1.64286	1.15073	13	2.30769	1.4367	2.61538	1.7097	2.15385	1.57301	2.38462	2.02231	1.69231	1.37747	1	F	none	undifferentiated		unclassified
2079	schildern	opisywać	26	2.73077	1.71015	1.61538	1.20256	1.46154	0.646886	1.46154	0.646886	1.34615	0.745241	14	2.57143	1.94992	1.07143	0.267261	1.21429	0.578934	1.14286	0.363137	1.07143	0.267261	12	2.91667	1.44338	2.25	1.54479	1.75	0.621582	1.83333	0.717741	1.66667	0.984732		H	none	H		N
1710	opium	opium	26	1.92308	1.57285	1.84615	1.34736	2.19231	1.67378	2.88462	1.84015	2.53846	2.13973	12	2.08333	1.72986	1.41667	0.996205	1.5	1	2.41667	1.56428	1.58333	1.1645	14	1.78571	1.47693	2.21429	1.52812	2.78571	1.92867	3.28571	2.01642	3.35714	2.46848	1	F	none	undifferentiated		unclassified
2467	trauern	opłakiwać	27	1.22222	0.974022	2.96296	1.87045	5.96296	1.48016	3.14815	2.0885	1.96296	1.7205	14	1.07143	0.267261	3.5	2.06621	6.42857	1.01635	3.71429	2.12779	1.78571	1.62569	13	1.38462	1.38675	2.38462	1.50214	5.46154	1.76141	2.53846	1.94145	2.15385	1.86396		S	S	S		S
2783	widerstand	oporny	26	1.73077	1.04145	3.26923	1.82335	2	1.29615	2.34615	1.57334	1.84615	1.43366	11	1.63636	1.02691	4.18182	1.77866	2.27273	1.3484	2.54545	1.57249	1.45455	0.934199	15	1.8	1.08233	2.6	1.59463	1.8	1.26491	2.2	1.61245	2.13333	1.68466		A	none	undifferentiated		A
655	erzählen	opowiadać	26	4.19231	1.57529	1.57692	0.902134	1.92308	1.12865	1.76923	1.1422	1.57692	1.17211	13	4.23077	1.73944	1.84615	1.06819	1.92308	1.03775	1.92308	1.18754	1.61538	1.04391	13	4.15385	1.46322	1.30769	0.630425	1.92308	1.25576	1.61538	1.1209	1.53846	1.33012		H	H	H		unclassified
1711	opposition	opozycja	26	1.53846	0.859338	2.69231	1.8925	2.03846	1.45549	2.34615	1.62339	2.15385	1.91191	12	1.75	1.05529	2.25	1.28806	1.83333	1.02986	2.08333	1.1645	1.58333	1.1645	14	1.35714	0.633324	3.07143	2.269	2.21429	1.76193	2.57143	1.94992	2.64286	2.30742		A	none	undifferentiated		unclassified
1684	not	opresja	26	1.19231	0.69393	3.5	1.63095	3.73077	1.63848	4.88462	1.63284	2.65385	1.87494	15	1.13333	0.516398	3.66667	1.75933	3.8	1.65616	5.33333	1.49603	2.4	1.72378	11	1.27273	0.904534	3.27273	1.48936	3.63636	1.68954	4.27273	1.67874	3	2.09762		F	none	F		F
813	ganove	opryszek	26	1.38462	0.803837	2.57692	1.4744	1.96154	1.3109	2.80769	1.57529	3	1.49666	12	1.41667	0.900337	2.25	1.28806	2.16667	1.4668	2.25	1.28806	2.5	1.16775	14	1.35714	0.744946	2.85714	1.61041	1.78571	1.18831	3.28571	1.68379	3.42857	1.65084	1	D	none	undifferentiated		unclassified
[truncated: 1,528 more rows]

## Sheet: Description
No.	number identifying each of the 2902 words and corresponding to the original number in the BAWL-R (Võ et al., 2009)
[truncated: 42 more rows]
